# Supplementary material
Source: publisher figshare collection journal article supplement (https://acs.figshare.com/ndownloader/files/25756983)
Supplement: Supplementary file 1 [file 25756983]

## Sheet: Proteins
Table S4_Multireport of proteins identified in the crop section of the Apis mellifera gut tissue
Checked	Protein FDR Confidence: Combined	Master	Accession	Description	tBlastn results	Exp. q-value: Combined	Contaminant	Sum PEP Score	Coverage [%]	# Peptides	# PSMs	# Unique Peptides	# AAs	MW [kDa]	calc. pI	Score Sequest HT: A Sequest HT	Score Sequest HT: B Sequest HT	Score Sequest HT: C Sequest HT	Score Sequest HT: D Sequest HT	Score Sequest HT: E Sequest HT	Score Sequest HT: F Sequest HT	Score Sequest HT: G Sequest HT	Score Sequest HT: H Sequest HT	Score Sequest HT: I Sequest HT	Score Sequest HT: J Sequest HT	Score Sequest HT: K Sequest HT	Score Sequest HT: L Sequest HT	Score Sequest HT: M Sequest HT	Score Sequest HT: N Sequest HT	Score Sequest HT: O Sequest HT	Score Sequest HT: P Sequest HT	Score Sequest HT: Q Sequest HT	Score Sequest HT: R Sequest HT	Score Sequest HT: S Sequest HT	Score Sequest HT: T Sequest HT	# Peptides (by Search Engine): A Sequest HT	# Peptides (by Search Engine): B Sequest HT	# Peptides (by Search Engine): C Sequest HT	# Peptides (by Search Engine): D Sequest HT	# Peptides (by Search Engine): E Sequest HT	# Peptides (by Search Engine): F Sequest HT	# Peptides (by Search Engine): G Sequest HT	# Peptides (by Search Engine): H Sequest HT	# Peptides (by Search Engine): I Sequest HT	# Peptides (by Search Engine): J Sequest HT	# Peptides (by Search Engine): K Sequest HT	# Peptides (by Search Engine): L Sequest HT	# Peptides (by Search Engine): M Sequest HT	# Peptides (by Search Engine): N Sequest HT
FALSE	High	Master Protein	A0A088AS00	1,2-dihydroxy-3-keto-5-methylthiopentene dioxygenase OS=Apis mellifera OX=7460 GN=LOC551839 PE=3 SV=1		0	FALSE	10.53	16	2	2	2	185	22.4	6.23						4.05										2.59										1
FALSE	High	Master Protein	A0A087ZUP0	14_3_3 domain-containing protein OS=Apis mellifera OX=7460 GN=14-3-3epsilon PE=3 SV=1		0	FALSE	82.772	47	12	138	10	256	29.1	4.89	16.65	25.37	5.39	3.92	11.74	30.76	13.47	15.48	9.97	3.85	30.47	13.94	9.79	18.55	8.01	11.22	25.69	9.11	12.43	17.6	3	5	2	2	6	7	3	4	3	1	9	4	3	5
FALSE	High	Master Protein	V5T877	2,3-bisphosphoglycerate-dependent phosphoglycerate mutase OS=Lactobacillus mellifer OX=1218492 GN=gpmA PE=3 SV=1		0	FALSE	6.866	4	1	5	1	240	27.3	5.4							2.46					9.61															1					1
FALSE	High	Master Protein	A0A088A1W8	26S proteasome non-ATPase regulatory subunit 2 OS=Apis mellifera OX=7460 GN=Psmd2 PE=3 SV=1		0	FALSE	171.189	43	26	214	26	892	98.6	5.52	39.13	35.03	4.6	1.76	7.14	65.53	51.93	42.69		11.5	84.71	34.5	23.4	32.85	10.37	24.76	22.67	19.66	13.75	17.57	12	8	2	2	3	15	13	13		6	19	10	10	11
FALSE	High	Master Protein	A0A088A406	2Fe-2S ferredoxin-type domain-containing protein OS=Apis mellifera OX=7460 PE=4 SV=1		0.004	FALSE	3.22	22	1	1	1	133	14.6	4.6						2.43																				1
FALSE	High	Master Protein	A0A088A189	2-oxoacid_dh domain-containing protein OS=Apis mellifera OX=7460 PE=4 SV=1		0	FALSE	77.691	35	8	147	8	311	33.8	9.45	24.72	13.53	16.53	10.27	7.71	42.52	17.83	32.2	6	29.1	42.35	18.66	46.94	39.33	25.24	7.08	1.7	7.04	7.32	10.69	5	3	4	4	2	7	4	5	4	5	7	5	8	7
FALSE	High	Master Protein	A0A0P0QIA0	30S ribosomal protein S2 OS=Serratia marcescens OX=615 GN=rpsB PE=3 SV=1		0.002	FALSE	4.042	4	1	11	1	241	26.6	8.13	1.72	6.21	0				2.17				2.01	6.81	0								1	1	1				1				1	1	1
FALSE	High	Master Protein	A0A087ZZQ9	3-hydroxy-3-methylglutaryl coenzyme A synthase OS=Apis mellifera OX=7460 GN=Hmgs PE=3 SV=1		0	FALSE	13.648	13	3	5	3	453	50.8	7.74						2.56					4.41															2					3
FALSE	High	Master Protein	A0A088AET4	3-hydroxyisobutyryl-CoA hydrolase, mitochondrial OS=Apis mellifera OX=7460 GN=LOC412796 PE=3 SV=1		0	FALSE	100.085	40	16	136	16	440	48.7	8.75	46.51	16.51	23.96	2.36	2.53	26.87	25	15.12	0	2.84	25.87	24.13	23.66	30.33	17.35	13.31	14.69	10.33	3.03		10	5	7	3	2	7	4	3	2	1	8	5	7	9
FALSE	High	Master Protein	C5CAC8	3-isopropylmalate dehydratase large subunit OS=Micrococcus luteus (strain ATCC 4698 / DSM 20030 / JCM 1464 / NBRC 3333 / NCIMB 9278 / NCTC 2665 / VKM Ac-2230) OX=465515 GN=leuC PE=3 SV=1		0	FALSE	6.618	3	1	2	1	484	51.6	5.21												5.87																				1
FALSE	High	Master Protein	A0A088AI57	40S ribosomal protein S12 OS=Apis mellifera OX=7460 PE=3 SV=1		0	FALSE	27.821	39	4	26	4	168	18.6	7.12		7.69				12.96	13.3	3.65		0	15.27	4.18		7.64	3.33	0	3.15	3				1				3	2	1		1	3	2		1
FALSE	High	Master Protein	A0A088AVR2	40S ribosomal protein S21 OS=Apis mellifera OX=7460 GN=LOC551479 PE=3 SV=1		0.001	FALSE	5.263	12	1	4	1	83	9.2	6.52		2.45					2.62				2.21							2.26				1					1				1
FALSE	High	Master Protein	A0A088A5I5	40S ribosomal protein S24 OS=Apis mellifera OX=7460 GN=LOC408799 PE=3 SV=1		0	FALSE	36.315	28	4	63	4	132	15.3	10.89	10.05	12.3	11.95	9.04	9.99	12.09	11.83	16.1	4.82	14.02	14.36	10.94	19.11	14.35	14.22	4.86	1.3				2	3	2	2	1	3	3	4	1	3	3	3	3	3
FALSE	High	Master Protein	A0A088AFP5	40S ribosomal protein S25 OS=Apis mellifera OX=7460 GN=RpS25 PE=3 SV=1		0	FALSE	37.417	36	6	118	6	119	13.4	10.36	15.47	16.4	7.69	9.68	10.37	25.09	18.67	23.85	11.9	14.18	23.53	30.83	23.06	19.38	14.3	13.21	3.85	16.41	8.46	6.91	4	4	2	3	4	5	3	5	3	4	5	6	5	5
FALSE	High	Master Protein	A0A088AKL1	40S ribosomal protein S26 OS=Apis mellifera OX=7460 GN=RpS26 PE=3 SV=1		0	FALSE	16.465	32	3	65	3	114	13.1	11.14	4.61	4.79	5.72	4.69	4.73	8.19	11.87	12.44	2.03	10.3	11.33	9.26	8.91	8.61	9.38	11		11.23	4.31	6.43	1	1	2	2	2	2	2	2	1	2	3	3	2	2
FALSE	High	Master Protein	A0A088A003	40S ribosomal protein S30 OS=Apis mellifera OX=7460 GN=RpS30 PE=3 SV=1		0.001	FALSE	4.61	8	1	3	1	132	14.7	10.14						3.03					2.96	2.7														1					1	1
FALSE	High	Master Protein	A0A088AD55	40S ribosomal protein S3a OS=Apis mellifera OX=7460 GN=RpS3A PE=3 SV=1		0	FALSE	101.298	61	16	288	16	267	30	9.66	36.88	36.78	24.02	30.85	25.54	56.76	42.63	47.88	26.17	41.33	38.53	40.86	36.43	36.44	33.85	32.92	42.79	30.03	46.11	11.42	12	12	6	10	11	14	12	12	8	11	12	9	10	14
FALSE	High	Master Protein	A0A088AHT9	40S ribosomal protein S4 OS=Apis mellifera OX=7460 GN=LOC550651 PE=3 SV=1		0	FALSE	112.857	56	16	328	16	262	29.4	10.24	36.6	64.53	35.35	36.55	33.75	65.61	62.24	63.55	16.86	65.3	64.28	45.79	58.09	52.28	54.11	25.06	2.18	17.86	12.8	18.14	7	9	8	8	6	10	10	11	7	13	11	10	9	10
FALSE	High	Master Protein	A0A088AFT2	40S ribosomal protein S6 OS=Apis mellifera OX=7460 GN=LOC725647 PE=3 SV=1		0	FALSE	38.626	29	6	114	6	251	28.9	10.95	13.79	11.16	10.28	11.95	13.5	19.4	20.33	22.91	2.08	17.96	18.62	12.4	15.23	14.04	14.6	13.69	2.55	11.25	4.21	17.04	4	3	4	3	3	3	4	4	3	3	3	3	4	3
FALSE	High	Master Protein	A0A088A8A7	40S ribosomal protein S7 OS=Apis mellifera OX=7460 GN=RpS7 PE=3 SV=1		0	FALSE	94.644	59	12	291	12	214	24.6	9.76	43.13	53.06	28.22	15.64	21.73	47.14	40.57	44.72	10.79	33.76	49.18	35.21	38.84	34.08	21.99	27.16	23	17.57	4.05	7.41	8	10	5	5	9	10	10	10	5	9	9	8	8	8
FALSE	High	Master Protein	A0A087ZV06	40S ribosomal protein S8 OS=Apis mellifera OX=7460 GN=Rps8 PE=3 SV=1		0	FALSE	74.434	52	10	168	10	208	23.9	10.59	20.65	19.73	12.25	21.99	29.69	33.15	32.69	31.44	12.15	23.19	22.33	22.07	21.37	20.58	28.01	22.26	6.87	25.45	21.31	18.5	6	6	5	8	7	8	8	8	5	8	5	6	7	5
FALSE	High	Master Protein	A0A087ZXD5	40S ribosomal protein SA OS=Apis mellifera OX=7460 GN=RpSA PE=3 SV=1		0	FALSE	67.593	41	8	158	8	310	33.7	5.05	21.49	24.78	8.9	8.07	10.17	44.15	24.31	21.47	8.03	13.49	32.46	31.57	19.18	24.56	12.57	32.44	17.15	47.47	6.22	12.94	4	5	4	4	5	6	6	5	4	4	6	6	5	5
FALSE	High	Master Protein	A0A087EPL2	50S ribosomal protein L30 OS=Lactobacillus kunkeei OX=148814 GN=rpmD PE=3 SV=1		0.001	FALSE	5.442	23	1	1	1	60	6.7	10.7												2.89																				1
FALSE	High	Master Protein	A0A088A7I3	5-formyltetrahydrofolate cyclo-ligase OS=Apis mellifera OX=7460 GN=100577699 PE=3 SV=1		0	FALSE	7.89	11	2	10	2	195	22.7	8.31	2.97			1.7	1.83				2.21		2.86	0		0			2.18		0		1			1	1				1		2	1		1
FALSE	High	Master Protein	Q83ZS6	60 kDa chaperonin (Fragment) OS=Pectobacterium carotovorum subsp. carotovorum OX=555 GN=cpn60 PE=4 SV=1		0	FALSE	15.094	7	2	8	2	185	19.4	4.67		3.89										17.82								3.07		1										2
FALSE	High	Master Protein	A0A087ZPA5	60S acidic ribosomal protein P0 OS=Apis mellifera OX=7460 GN=RpLP0 PE=3 SV=1		0	FALSE	115.292	48	11	209	11	317	34.4	6	38.03	28.45	23.97	16.39	28.29	53.72	54.43	41.41	20.97	34.51	66.02	39.83	50.38	57.04	47.6	21.96	30.98	27.5	21.57	12.05	7	6	5	3	3	8	7	6	5	5	9	6	8	9
FALSE	High	Master Protein	A0A088ARA9	60S ribosomal protein L13 OS=Apis mellifera OX=7460 GN=RpL13 PE=3 SV=1		0	FALSE	42.351	39	9	214	9	219	25.3	10.93	30.08	19.3	21.08	27.54	31.42	35.77	16.8	32.12	20.55	31.45	20.8	10.29	16.2	18.1	20.3	28.53	13.74	19.97	10.34	1.65	7	5	6	6	7	9	4	7	5	7	8	2	7	6
FALSE	High	Master Protein	A0A088AH51	60S ribosomal protein L18 OS=Apis mellifera OX=7460 GN=102654426 PE=4 SV=1		0	FALSE	64.039	39	7	209	7	188	21.7	11.75	38.91	46.23	28.83	45.88	37.65	41.67	47.65	37.05	8.9	43.86	44.7	36.14	38.71	42.76	43.13	15.19	12.62	33.87	17.94	7.65	5	6	4	4	4	7	6	6	3	6	5	4	5	5
FALSE	High	Master Protein	A0A088A7V4	60S ribosomal protein L18a OS=Apis mellifera OX=7460 GN=RpL18A PE=3 SV=1		0	FALSE	54.684	43	11	203	11	177	21	10.7	10.37	22.99	16.21	18.98	14.05	31.56	31.41	36.68	7.54	26.71	35.45	23.25	20.21	25.02	22.97	11	1.73	20.15	19.55	7.97	4	7	6	6	5	11	8	10	3	9	9	6	7	8
FALSE	High	Master Protein	A0A088ACL1	60S ribosomal protein L27 OS=Apis mellifera OX=7460 GN=RpL27 PE=3 SV=1		0	FALSE	35.027	37	6	58	6	134	16.1	10.59	4.81	6.18	4.49	4	13.12	8.25	12.86	11.84		8.86	12.05	5.4	8.42	13.7	8.98	6.83	3.39	5.73			2	2	2	2	4	3	3	4		3	3	1	3	4
FALSE	High	Master Protein	A0A088ACQ3	60S ribosomal protein L29 OS=Apis mellifera OX=7460 GN=RpL29 PE=3 SV=1		0	FALSE	12.779	17	2	13	2	71	8.6	11.58		3.12			2.85	6.88	8.51	3.62			3.52	3.45	3.41	2.65	2.14			3.45				1			1	2	2	1			1	1	1	1
FALSE	High	Master Protein	H9K170	60S ribosomal protein L32 OS=Apis mellifera OX=7460 GN=RpL32 PE=4 SV=1		0	FALSE	36.754	34	6	75	6	134	15.9	11.6	8.1	9.1	12.59	4.86	10.43	10.21	15.29	13.77	0	9.04	12.05	9.57	11.4	16.15	9.57	10.33		14.19	7.34	5.61	3	2	3	2	3	4	4	4	1	3	4	3	4	4
FALSE	High	Master Protein	A0A0B4J2P3	60S ribosomal protein L36 OS=Apis mellifera OX=7460 GN=RpL36 PE=3 SV=1		0	FALSE	22.035	35	5	65	5	115	13.4	11.5	4.21	10.58	2.55	2.06	2.11	10.98	8.05	14.59	7.3	7.26	10.93	8.09	7.28	8.41	9.5	4.4	4.85	9.13			2	4	2	2	1	3	3	3	2	2	3	3	3	3
FALSE	High	Master Protein	A0A087ZWB6	6PF2K domain-containing protein OS=Apis mellifera OX=7460 PE=4 SV=1		0	FALSE	7.39	3	1	3	1	452	52.3	6.54						3.61											3.01	2.78								1
FALSE	High	Master Protein	A0A088AHG6	6-phosphofructokinase OS=Apis mellifera OX=7460 PE=3 SV=1		0	FALSE	258.645	46	30	517	30	886	98.5	6.68	95.31	109.57	50.55	67.44	28.87	123.28	101.79	113.7	35.45	26.25	124.43	77.27	116.11	106.15	51.88	75.16	31.14	28.91	24.41	55.25	16	15	14	20	10	19	14	21	9	8	18	15	20	20
FALSE	High	Master Protein	A0A088AKI3	6-phosphogluconate dehydrogenase, decarboxylating OS=Apis mellifera OX=7460 GN=Pgd PE=3 SV=1		0	FALSE	152.653	63	19	230	19	482	52.9	7.46	48.1	31.21	16.18	11.49	10.27	82.63	12.94	2.9	9.73	0	89.27	36.77	2.19	62.96	10.37	32.98	39.33	23.21	18.96	11.34	14	9	6	5	4	14	5	2	4	1	15	8	1	13
FALSE	High	Master Protein	A0A087EQF2	6-phosphogluconate dehydrogenase, decarboxylating OS=Lactobacillus kunkeei OX=148814 GN=JI66_01835 PE=3 SV=1		0	FALSE	6.778	4	1	1	1	479	52.9	5.08												2.56																				1
FALSE	High	Master Protein	A0A088A588	6-phosphogluconolactonase OS=Apis mellifera OX=7460 GN=LOC551785 PE=3 SV=1		0	FALSE	10.783	16	2	4	2	238	26.2	5.97						3.1					2.61			2.55			2.33									1					1			1
FALSE	High	Master Protein	A0A023RDH9	70kDa heat shock cognate protein OS=Antheraea pernyi OX=7119 GN=HSP70 PE=2 SV=1		0	FALSE	206.444	30	19	540	1	652	71.4	5.52	103.25	74.2	35.69	56.21	30.34	133.85	49.77	45.53	66.11	18.82	114.71	81.44	56.15	112.2	33.8	123.89	61.31	184.04	122.24	67.78	14	11	8	9	8	16	12	10	11	6	15	13	10	14
FALSE	High	Master Protein	A0A088A551	Aa_trans domain-containing protein OS=Apis mellifera OX=7460 GN=path PE=4 SV=1		0	FALSE	8.316	4	1	1	1	468	51.6	6.95																		3
FALSE	High	Master Protein	A0A088AMB2	AA_TRNA_LIGASE_II domain-containing protein OS=Apis mellifera OX=7460 GN=Aats-asp PE=3 SV=1		0.001	FALSE	5.403	3	2	2	2	533	60.5	7.05														1.9						0														1
FALSE	High	Master Protein	A0A087ZNA9	AA_TRNA_LIGASE_II domain-containing protein OS=Apis mellifera OX=7460 GN=Aats-ser PE=4 SV=1		0.002	FALSE	4.38	4	1	2	1	427	49.5	8.76													2.38							3.72													1
FALSE	High	Master Protein	A0A088AUV5	AA_TRNA_LIGASE_II domain-containing protein OS=Apis mellifera OX=7460 GN=LOC410806 PE=3 SV=1		0.001	FALSE	4.521	3	2	2	2	603	68.6	6.57												1.75						1.95														1
FALSE	High	Master Protein	A0A087ZP92	AA_TRNA_LIGASE_II domain-containing protein OS=Apis mellifera OX=7460 GN=LOC412200 PE=3 SV=1		0	FALSE	21.095	10	6	14	6	714	83.3	7.03	2.22	1.93				8.08					4.46	2.45		4.68		5.04	1.98	2.89			1	1				3					1	1		2
FALSE	High	Master Protein	A0A088A397	AA_TRNA_LIGASE_II domain-containing protein OS=Apis mellifera OX=7460 GN=LOC413011 PE=4 SV=1		0.001	FALSE	5.647	9	2	3	2	496	57.4	7.24						2.39					2.34															2					1
FALSE	High	Master Protein	A0A087ZU43	AA_TRNA_LIGASE_II domain-containing protein OS=Apis mellifera OX=7460 GN=LOC551088 PE=4 SV=1		0	FALSE	12.23	12	4	5	4	556	64.5	6.23						5.17											3.1	0								3
FALSE	High	Master Protein	A0A088ADF9	AA_TRNA_LIGASE_II domain-containing protein OS=Apis mellifera OX=7460 GN=LOC726436 PE=4 SV=1		0	FALSE	14.249	8	3	16	3	433	49.4	8.76	0	4.12	1.73	0		5.03	0	3.08		0	5.06	2.47	2.95							3.13	1	2	1	1		2	1	1		1	2	1	1
FALSE	High	Master Protein	A0A088ARS3	AAA domain-containing protein OS=Apis mellifera OX=7460 GN=bor PE=4 SV=1		0	FALSE	33.583	18	10	20	10	608	68.8	9.03						5.44	1.84	5	0		2.08	2.53	3.56	1.89	3.62	4.97		3.9	0	2.58						2	1	2	1		1	1	1	1
FALSE	High	Master Protein	A0A0B4J2L4	AAA domain-containing protein OS=Apis mellifera OX=7460 GN=LOC410026 PE=3 SV=1		0	FALSE	110.066	55	17	83	17	415	47	5.33	9.41	9.36	2.29		0	39.94	3.46	15.86	2.06	5.46	29.06	19.21	8.9	16.78	4.74	6.44	21.18	8.03	9.46	14.68	2	3	1		1	9	2	5	2	2	7	4	4	3
FALSE	High	Master Protein	A0A088A5P5	AAA domain-containing protein OS=Apis mellifera OX=7460 GN=LOC410289 PE=4 SV=1		0	FALSE	7.705	3	2	4	2	752	85.5	9.23						2.28					2.83		4.9													1					1		2
FALSE	High	Master Protein	A0A088AW81	AAA domain-containing protein OS=Apis mellifera OX=7460 GN=LOC411858 PE=3 SV=1		0.001	FALSE	5.718	5	1	1	1	376	42.5	6.8											3.31																				1
FALSE	High	Master Protein	A0A0B4J2N0	AAA domain-containing protein OS=Apis mellifera OX=7460 GN=LOC550794 PE=3 SV=1		0	FALSE	115.87	58	18	128	17	405	45.7	8.5	20.84	16.96	15.62	9	5.84	51.29	36.09	24.96	7.13	17.83	52.42	18.65	16.05	16.8	7.12	13.45	20.95	15.73	12.83	6.45	6	5	6	2	2	11	8	6	3	4	10	4	4	5
FALSE	High	Master Protein	A0A0B4J2P2	AAA domain-containing protein OS=Apis mellifera OX=7460 GN=LOC551386 PE=3 SV=1		0	FALSE	96.478	55	16	103	16	393	44.5	7.44	20.84	18.44	2.43	2.66	2.63	39.34	26.01	21.17	2.17	4.9	33.65	12.65	9.64	25.8	5.25	5.95	37.65	5.66	2.58	3.23	4	5	3	1	2	9	4	4	2	2	7	4	2	5
FALSE	High	Master Protein	A0A088A5D5	AAA domain-containing protein OS=Apis mellifera OX=7460 GN=LOC552166 PE=3 SV=1		0	FALSE	158.699	36	24	306	24	803	91	8.76	46.68	32.74	48.11	7.5	15.51	43.56	57.44	67.52	11.63	56.03	44.82	27.23	35.08	41.44	27.86	19.47	20.83	29.45	21.94	6.78	13	10	14	4	8	13	14	15	9	15	15	10	13	12
FALSE	High	Master Protein	A0A0B4J2L7	AAA domain-containing protein OS=Apis mellifera OX=7460 GN=Pros26.4 PE=3 SV=1		0	FALSE	68.461	38	12	42	11	440	49.2	6.76		4.8				11.46	4.82				16.43	8.63	3.43	6.48		11.66	19.45	21.66	19.01	8.45		1				3	1				5	3	1	2
FALSE	High	Master Protein	A0A088A957	AAA domain-containing protein OS=Apis mellifera OX=7460 GN=Rpt1 PE=3 SV=1		0	FALSE	93.484	54	17	114	17	434	48.4	6.07	16.49	16.75	6.33	0	2.57	33.35	20.27	19.34		9.98	47.78	27.63	7.4	11.94	1.89	16.22	24.82	27.43	6.25	5.03	5	5	3	1	1	7	6	6		4	11	7	3	4
FALSE	High	Master Protein	A0A088AC90	AAA domain-containing protein OS=Apis mellifera OX=7460 GN=Tbp-1 PE=3 SV=1		0	FALSE	120.134	61	17	143	16	428	47.6	5.17	29.08	20	4.7	0	4.33	77.16	30.69	36.5	0	9.4	48.81	28.54	21.74	40.5	13.61	15.19	45.58	20.07	4.38	4.77	6	4	2	1	2	12	6	7	2	2	7	8	5	7
FALSE	High	Master Protein	A0A088AB81	Aamy domain-containing protein OS=Apis mellifera OX=7460 GN=AGLU-like2 PE=4 SV=1		0	FALSE	16.539	10	4	12	4	616	69.7	5.17	0	0	0			0	0			1.72			3.92	0			2.85				1	2	1			1	1			1			2	1
FALSE	High	Master Protein	A0A088A337	AB hydrolase-1 domain-containing protein OS=Apis mellifera OX=7460 GN=LOC552611 PE=4 SV=1		0	FALSE	7.921	5	1	1	1	388	43.8	7.55																				6.26
FALSE	High	Master Protein	A0A088A9Q3	AB hydrolase-1 domain-containing protein OS=Apis mellifera OX=7460 PE=4 SV=1		0.001	FALSE	5.251	3	1	3	1	506	57.1	6.64						2.8	3.12				2.3															1	1				1
FALSE	High	Master Protein	A0A088AF57	ABC transporter domain-containing protein OS=Apis mellifera OX=7460 GN=LOC409666 PE=4 SV=1		0	FALSE	130.439	31	19	177	18	799	89.4	6.96	46.09	43.07	32.09	7.78	16.64	28.99	22.66	70.83		20.71	39	23.16	27.99	19.31	9.8	10.45	19.58	16.17	11.06	16.89	12	11	9	4	6	8	6	18		6	13	8	11	6
FALSE	High	Master Protein	A0A087ZSQ4	ABC transporter domain-containing protein OS=Apis mellifera OX=7460 GN=LOC413844 PE=4 SV=1		0.001	FALSE	5.106	5	2	3	2	820	91.4	8.48						0				0	2.11															1				1	1
FALSE	High	Master Protein	A0A088AN63	ABC transporter domain-containing protein OS=Apis mellifera OX=7460 GN=LOC414051 PE=4 SV=1		0	FALSE	13.238	6	3	8	3	703	79.2	7.58					1.62	2.82	2.24	2.92			6.48	2.02	2.9												1	1	1	1			2	1	1
FALSE	High	Master Protein	A0A087ZSN8	ABC transporter domain-containing protein OS=Apis mellifera OX=7460 GN=LOC726513 PE=4 SV=1		0	FALSE	9.717	6	3	4	3	625	69.1	8.76	2.33					0					4.26										1					1					2
FALSE	High	Master Protein	A0A087ZQY9	ABC transporter domain-containing protein OS=Apis mellifera OX=7460 PE=4 SV=1		0	FALSE	53.27	22	12	114	11	620	69.4	6.68	8.92	11.49	5.94		5.35	16.88	4.37	31.23		5.89	18.84	11.9	11.72	10.19	5.93	4.17	9.05	16.03	5.9	6.32	4	6	3		3	8	5	11		5	6	5	6	5
FALSE	High	Master Protein	A0A087ZS34	ABC transporter domain-containing protein OS=Apis mellifera OX=7460 PE=4 SV=1		0	FALSE	8.649	2	1	17	1	601	68.3	8.16	0	5.41				5.65	5.09	2.08		0	5.32	0	3.15	2.05							1	1				1	1	1		1	1	1	1	1
FALSE	High	Master Protein	A0A088AHK0	Abhydrolase_2 domain-containing protein OS=Apis mellifera OX=7460 GN=LOC409201 PE=4 SV=1		0	FALSE	9.567	11	2	7	2	219	23.8	7.53	2.42			2.03	2.08	2.23			3.93										2.63		1			1	1	1			1
FALSE	High	Master Protein	A0A087ZSM9	ACB domain-containing protein OS=Apis mellifera OX=7460 GN=LOC411272 PE=4 SV=1		0	FALSE	70.442	78	9	82	9	89	10	7.18	2.69	15.24	1.86			26.85	14.11		27.97		4.16	8.07		10.2	1.98	2.46	49.96	4.05		24.68	1	4	1			6	2		5		3	2		2
FALSE	High	Master Protein	A0A087ER89	Acetoin reductase OS=Lactobacillus kunkeei OX=148814 GN=JI66_00625 PE=3 SV=1		0	FALSE	11.099	12	2	3	2	257	26.7	4.88												6.26								2.83												2
FALSE	High	Master Protein	A0A088ADC5	AcetylCoA_hyd_C domain-containing protein OS=Apis mellifera OX=7460 PE=4 SV=1		0	FALSE	123.939	42	14	132	14	448	49.6	7.81	25.47	8.29	25.06			79.48	15.16	20.73			41.59	12.08	35.24	36.68	28.74	15.83	4.63	10.96	6.22	12.06	6	3	7			12	5	5			10	5	8	10
FALSE	High	Master Protein	A0A088ADU5	acidPPc domain-containing protein OS=Apis mellifera OX=7460 GN=LOC552437 PE=4 SV=1		0.001	FALSE	4.91	6	1	4	1	212	24.4	9		3.4				0				2.6			2.54									1				1				1			1
FALSE	High	Master Protein	A0A087ZXK3	Aconitate hydratase, mitochondrial OS=Apis mellifera OX=7460 GN=LOC408446 PE=3 SV=1		0	FALSE	440.084	58	44	755	44	788	85.9	8.44	239.38	102.2	183.94	12.86		306.03	106.75	91.29	45.7	6.64	237.29	87.84	70.53	245.35	89.77	148.11	128.76	100.49	84.28	39.66	30	23	27	7		39	21	21	17	2	31	21	16	33
FALSE	High	Master Protein	O15560	Actin (Fragment) OS=Antonospora locustae OX=278021 GN=ACT1 PE=3 SV=1		0	FALSE	35.786	10	4	1064	2	327	36.3	6.19	98.72	80.2	104.94	29.34	27.12	124.24	23.43	92.86	49.96	68.21	88.67	39.73	80.78	78.9	58.32	357.95	17.39	67.68	11.19	31.32	1	3	3	1	1	3	2	2	1	1	1	1	1	1
FALSE	High	Master Protein	A0A088AJ79	Actin-related protein 2 OS=Apis mellifera OX=7460 GN=LOC409313 PE=3 SV=1		0	FALSE	22.602	18	5	17	4	406	46	6.47	2.99	2.39				9.06	2.56	2.38			5.45					1.66		6.27		2.99	2	2				3	2	2			2
FALSE	High	Master Protein	A0A087ZYS4	Actin-related protein 2/3 complex subunit 3 OS=Apis mellifera OX=7460 GN=Arpc3A PE=3 SV=1		0	FALSE	8.176	12	3	6	3	177	20.2	8.51				1.68	0	0					2.15			1.79				1.73						1	1	1					1			1
FALSE	High	Master Protein	A0A088A168	Actin-related protein 2/3 complex subunit 4 OS=Apis mellifera OX=7460 GN=Arpc4 PE=3 SV=1		0.001	FALSE	4.574	7	1	3	1	168	19.7	8.57						3.03	2.55	2.48																		1	1	1
FALSE	High	Master Protein	A0A088A6E7	Actin-related protein 2/3 complex subunit 5 OS=Apis mellifera OX=7460 GN=p16-ARC PE=3 SV=1		0	FALSE	12.477	19	3	9	3	157	17.3	5.64		1.71					4.03				4.86						4.86	2.56		2.9		1					2				2
FALSE	High	Master Protein	A0A088A9T8	Actin-related protein 2/3 complex subunit OS=Apis mellifera OX=7460 GN=Sop2 PE=3 SV=1		0	FALSE	7.242	5	2	2	2	368	41	7.46	1.82										2.28										1										1
FALSE	High	Master Protein	A0A088AVR3	Acyl carrier protein OS=Apis mellifera OX=7460 PE=3 SV=1		0	FALSE	30.91	31	7	80	7	187	21.5	8.43	12.55	9.15	10.46	2.53	10.1	9.41	4.99	9.08	20.67	7.06	9.43	8.03	7.42	10.23	10.44	6.58	2.44	4.01	5.87	20.64	3	2	3	1	3	3	1	2	6	3	3	2	2	3
FALSE	High	Master Protein	A0A088ARZ1	Acyl-coenzyme A oxidase OS=Apis mellifera OX=7460 PE=3 SV=1		0	FALSE	43.048	16	8	27	8	663	75	7.46	6.69	5.5	2.37			3.24	12.16	11.99			6.97	6.59		3.96			4.33	9.4	4.78	1.69	2	1	1			1	5	4			2	2		1
FALSE	High	Master Protein	A0A088A1B6	Adenosylhomocysteinase OS=Apis mellifera OX=7460 GN=LOC408368 PE=3 SV=1		0	FALSE	56.008	32	9	33	9	433	47.9	7.28	2.86	7.31				20.34	2.29	0			17.8	8.56	0	0		3.88		3.57	3.59	3.77	2	2				6	1	1			6	2	1	1
FALSE	High	Master Protein	A0A0B4J2L5	Adenylate kinase OS=Apis mellifera OX=7460 GN=Adk2 PE=3 SV=1		0	FALSE	106.267	71	17	155	17	252	28.5	8.05	50.76	12.94	32.53	4.25	6.59	59.77	14.25	19.23	21.87	2.08	30.12	8.38	11.2	23.63	13.61	28.56	19.05	5.05	17.88	7.77	10	3	10	3	4	11	4	5	9	1	6	2	3	7
FALSE	High	Master Protein	A0A087ZXK2	Adenylosuccinate lyase OS=Apis mellifera OX=7460 PE=3 SV=1		0.005	FALSE	3.058	4	1	3	1	420	47.2	6.61		0				0											0					1				1
FALSE	High	Master Protein	A0A087EQH9	Adenylosuccinate lyase OS=Lactobacillus kunkeei OX=148814 GN=JI66_01475 PE=3 SV=1		0.001	FALSE	4.794	4	1	1	1	431	49.1	5.72												2.81																				1
FALSE	High	Master Protein	A0A087ZXT6	Adenylosuccinate synthetase OS=Apis mellifera OX=7460 GN=LOC409299 PE=3 SV=1		0	FALSE	27.299	12	4	65	4	449	49.3	8.12	4.74	1.34	1.42	1.4	2.64	15.39	4.41	3.01	0	4.31	7.89	1.49	3.1	4.2			0	0		3.14	2	1	2	1	1	3	2	2	1	1	2	1	1	1
FALSE	High	Master Protein	A0A087ZPC0	Adenylyl cyclase-associated protein OS=Apis mellifera OX=7460 GN=LOC410158 PE=4 SV=1		0	FALSE	93.142	31	17	86	17	767	85.1	5.36	30.02			4.71		47.81	3.62	4.67	13.97		41.31	4.28	3.36	16.55	0	24.86	19.15	2.61	16.71	3.44	6			2		11	1	2	4		10	1	1	4
FALSE	High	Master Protein	A0A088AUH4	ADF-H domain-containing protein OS=Apis mellifera OX=7460 GN=LOC725718 PE=3 SV=1		0	FALSE	46.911	52	8	64	8	148	16.8	6.57	11.22	8.01	2.14	9.69	2.19	15.88	8.88	2.79	10.42		17.64	5.64		9.41	5.67	22.48	16.26	6.36	12.69	12.21	3	2	1	3	1	5	3	1	4		4	2		3
FALSE	High	Master Protein	Q6VQ13	ADP/ATP translocase OS=Apis mellifera OX=7460 GN=Ant PE=2 SV=1		0	FALSE	261.049	83	26	2096	26	300	33	9.69	246.06	242.58	239.33	140.17	181.64	237.01	185.14	262.27	72.91	234.89	234.5	188.59	255.21	221.1	169.76	427.88	59.83	490.37	300.71	207.88	20	19	22	20	20	21	19	20	17	20	18	18	20	20
FALSE	High	Master Protein	A0A087ZSV2	AIP3 domain-containing protein OS=Apis mellifera OX=7460 PE=4 SV=1		0	FALSE	41.652	15	6	45	6	577	63.1	9.04	4.74	9.49	2.13	1.95	2.05	16.42	6.84	5.43	2.63	5.75	4.54		2.84	2.4	0		10.75	5.85	2.41	3.26	2	2	1	2	2	5	2	1	3	2	2		2	1
FALSE	High	Master Protein	A0A087ZSV1	AIP3 domain-containing protein OS=Apis mellifera OX=7460 PE=4 SV=1		0	FALSE	8.453	7	2	2	2	392	42.2	7.3									2.16							2.43													1
FALSE	High	Master Protein	A0A088AL04	AIRC domain-containing protein OS=Apis mellifera OX=7460 GN=ade5 PE=3 SV=1		0	FALSE	6.633	3	1	2	1	420	47.2	7.43																2.62		3.69
FALSE	High	Master Protein	A0A088ACS2	Aldedh domain-containing protein OS=Apis mellifera OX=7460 GN=Aldh PE=3 SV=1		0	FALSE	227.64	75	27	373	27	510	55.7	7.14	100.58	54.41	28.98	4.6	1.83	145.83	76.68	29.69	2.18	10.46	106.55	109.01	61.31	85.19	36.16	73.83	45.19	98.22	57.93	81.36	15	11	7	3	1	22	12	7	1	3	17	16	12	18
FALSE	High	Master Protein	A0A087ZNH4	Aldedh domain-containing protein OS=Apis mellifera OX=7460 GN=LOC409736 PE=4 SV=1		0	FALSE	35.649	15	5	15	5	520	56	8.03	10.22					18.23					9.86	3.54						5.31	3.49		2					3					2	1
FALSE	High	Master Protein	A0A088AAD1	Aldedh domain-containing protein OS=Apis mellifera OX=7460 GN=Ssadh PE=4 SV=1		0	FALSE	157.131	51	23	189	23	503	55.6	8.4	48.96	13.52	21.02	2.59		91.58	51.24	35.69	0	0	78.46	52.33	56.46	70.44	28.74	19.6	17.03	21.93	2.63	1.9	10	5	8	2		15	8	7	2	1	15	9	11	11
FALSE	High	Master Protein	A0A088AID7	Aldedh domain-containing protein OS=Apis mellifera OX=7460 PE=3 SV=1		0	FALSE	65.314	38	11	29	11	487	52.9	5.8	5.92	2.87				22.19	3.81				18.85	2.16		2.79			9.61	20.68	1.78		2	1				6	2				6	1		1
FALSE	High	Master Protein	A0A088ANX1	Aldehyde dehydrogenase OS=Apis mellifera OX=7460 PE=3 SV=1		0	FALSE	114.124	40	18	211	18	551	62.3	7.33	30.64	55.87	38.7	3.66	14.97	25.82	50.7	32.24		9.67	37.52	40.3	36.54	42.57	20.39	39.33	6.46	21.74	3.22	10.27	9	11	11	4	7	8	10	8		4	10	11	9	10
FALSE	High	Master Protein	A0A087ZZ66	Aldo_ket_red domain-containing protein OS=Apis mellifera OX=7460 GN=LOC411202 PE=4 SV=1		0	FALSE	33.692	29	6	12	6	321	37.2	7.87	2.12					11.7					6.35					1.74	5.89	1.77		1.75	1					3					2
FALSE	High	Master Protein	A0A088AGI6	Aldo_ket_red domain-containing protein OS=Apis mellifera OX=7460 GN=LOC412163 PE=4 SV=1		0	FALSE	21.737	21	5	14	5	311	35.2	7.87						3.31			6.04					2.98	10.62	2.91			2.64							1			4					1
FALSE	High	Master Protein	A0A087ZZR5	Aldo_ket_red domain-containing protein OS=Apis mellifera OX=7460 GN=LOC551927 PE=4 SV=1		0.002	FALSE	4.355	6	2	2	2	328	37.7	6.92				0																0				1
FALSE	High	Master Protein	A0A088AGI8	Aldo_ket_red domain-containing protein OS=Apis mellifera OX=7460 GN=LOC551968 PE=4 SV=1		0	FALSE	78.011	66	16	78	16	318	36.1	6.73	9.39					33.23			2.1		26.35	2.47		36.95	2.45	41.46	10.81	4.25	7.35	17.7	4					10			1		9	1		11
FALSE	High	Master Protein	A0A088AGI5	Aldo_ket_red domain-containing protein OS=Apis mellifera OX=7460 PE=4 SV=1		0	FALSE	92.373	53	14	84	14	318	36.4	7.09	8.25	4.68	4.57		2.81	51.82	4.45	2.48	13.96		35.77	5.37	2.11	17.1	6.95	23.02	23.66	7.97	16.4	5.99	4	2	2		1	12	2	1	6		9	2	1	6
FALSE	High	Master Protein	A0A088AEU8	Aldolase_II domain-containing protein OS=Apis mellifera OX=7460 GN=LOC409713 PE=4 SV=1		0	FALSE	319.526	31	32	623	32	1325	150.9	5.08	159.31	142.91	51.39	91.84	95.54	135.52	153.99	100.57	67.74	109.55	154.98	88.63	122.69	88.78	75.02	70.24	117.92	113.08	87.06	29.56	23	21	14	16	18	20	22	18	16	19	22	17	18	15
FALSE	High	Master Protein	A0A088A8P3	Alkylglycerone-phosphate synthase OS=Apis mellifera OX=7460 PE=3 SV=1		0	FALSE	122.445	37	13	145	13	562	63.3	8.09	7.64	40.19	61.09		3.75	42.96	28.86	52		6.49	36.81	46.93	47.62	46.88	17.25	5.02	0	30.21	7.51	16.42	2	8	12		1	6	6	8		2	6	9	9	8
FALSE	High	Master Protein	P83563	Allergen Api m 6.03 / Api m 6.04 OS=Apis mellifera OX=7460 PE=1 SV=2		0	FALSE	8.615	34	3	7	3	92	9.8	9.69				0					0	3.65														1					1	3
FALSE	High	Master Protein	A0A087ZVF4	Alpha-1,4 glucan phosphorylase OS=Apis mellifera OX=7460 GN=GlyP PE=3 SV=1		0	FALSE	141.311	43	30	131	30	844	97.3	6.37	7.6	29.58				51.77	18.47	8.33	0		68.49	18.57	10.52	8.18		29.22	23.06	16.4	13.64	29.93	3	10				15	6	3	1		19	6	4	3
FALSE	High	Master Protein	Q25BT8	Alpha-glucosidase OS=Apis mellifera OX=7460 GN=hbg1 PE=4 SV=1		0	FALSE	80.48	32	15	21	15	588	67.3	6.61														0	44.33					0														1
FALSE	High	Master Protein	Q25BT7	Alpha-glucosidase OS=Apis mellifera OX=7460 GN=hbg2 PE=4 SV=1		0	FALSE	58.513	22	9	27	9	580	66.5	6.28		8.16	1.8	2.9		5.11			0					32.65	7.95	3				14.8		2	1	1		2			1					7
FALSE	High	Master Protein	Q17058	Alpha-glucosidase OS=Apis mellifera OX=7460 PE=1 SV=1		0	FALSE	139.123	42	17	126	17	567	65.5	5.24					66.05	24.02					76.51	47.42		28.02	5.62					72.24					15	6					14	11		7
FALSE	High	Master Protein	A0A088APY3	Amidase domain-containing protein OS=Apis mellifera OX=7460 GN=LOC408742 PE=4 SV=1		0	FALSE	161.756	62	21	299	21	536	60.1	8.76	36.24	61.66	32.82	19.17	27.64	81.83	61.38	85.85		15.82	85.95	49.73	44.35	41.49	49.83	32.46	42.46	28.86	25.89	33.33	8	9	11	7	6	11	11	12		4	13	10	9	7
FALSE	High	Master Protein	A0A088ABQ0	Amidase domain-containing protein OS=Apis mellifera OX=7460 PE=4 SV=1		0	FALSE	25.427	16	6	16	6	496	55.4	8.81						2.58	12.78	1.68		0	7.56	2.1	7.72	2.31				1.9		0						1	2	1		1	2	1	3	1
FALSE	High	Master Protein	A0A088A8Y7	Amidase domain-containing protein OS=Apis mellifera OX=7460 PE=4 SV=1		0	FALSE	30.27	19	7	27	7	540	60.9	7.93	3.38	6.12	11.41	0		3.02	11.31	10.13			8	6.61	7.02	3.81	2.95	3.71	2.53	2.66			1	2	4	1		1	3	3			2	2	2	1
FALSE	High	Master Protein	A0A088ALH3	Amidohydro-rel domain-containing protein OS=Apis mellifera OX=7460 PE=4 SV=1		0	FALSE	59.944	22	11	29	11	688	74.9	6.23		2.58		0		19.61					14.21	2.33				19.49	4.09	7.56	7.03	4.33		1		1		6					6	1
FALSE	High	Master Protein	A0A088A150	Amino acid transporter OS=Apis mellifera OX=7460 GN=LOC409919 PE=3 SV=1		0	FALSE	56.974	19	5	134	5	503	54.6	6.65	27.67	33.8	8.63	4.31	4.47	32.18	41.48	34.39		18.1	35.39	21.96	33.68	29.22	17.85	3.98	24.41	4.7	0		3	4	2	1	1	4	4	4		4	4	4	4	4
FALSE	High	Master Protein	A0A088A624	Amino acid transporter OS=Apis mellifera OX=7460 PE=3 SV=1		0	FALSE	63.594	24	8	83	8	486	52.9	6.57	7.99	8.26	5.64			19.8	9.17	27.69	3.06	9.64	31.19	25.3	25.79	19.08	11.95	6.8	3.26	5.89	6.18	12.27	2	3	3			4	3	5	1	4	6	4	6	3
FALSE	High	Master Protein	A0A087ZSE6	Aminomethyltransferase OS=Apis mellifera OX=7460 GN=LOC410550 PE=3 SV=1		0	FALSE	16.595	9	3	5	3	455	49.6	9.42						2.52					5.23			2.06						2.99						1					2			1
FALSE	High	Master Protein	A0A087ZUG8	Aminopeptidase OS=Apis mellifera OX=7460 GN=LOC412808 PE=3 SV=1		0	FALSE	93.891	24	16	98	15	982	112.4	7.15	15.48	13.8	0	7.34	7.13	8.49	12.62	24.43		12.76	37.81	26.69	25.27	0	20.87		3.01	7.27	7.94	5.09	7	5	1	3	6	5	6	9		6	11	7	8	1
FALSE	High	Master Protein	A0A087ZUB3	Aminopeptidase OS=Apis mellifera OX=7460 GN=LOC551180 PE=3 SV=1		0	FALSE	42.521	10	9	27	8	928	108	6.76	2.76	3.29		3	2.66	2.78	3.05	2.62			2.74	2.59	3.25		21.88		3.01	3.1	2.84	3.09	1	1		1	1	1	1	1			1	1	1
FALSE	High	Master Protein	A0A087ZTK0	Aminopeptidase OS=Apis mellifera OX=7460 GN=Psa PE=3 SV=1		0	FALSE	135.761	39	24	85	24	867	98.5	5.54	2.66					57.05	2.09				51.36	14.32		25.61	0	35.49	19.16	21.5	3.03	12.27	1					15	1				14	4		8
FALSE	High	Master Protein	A0A087ZWR8	Aminopeptidase OS=Apis mellifera OX=7460 PE=3 SV=1		0	FALSE	30.738	11	6	25	6	971	111.2	5.2	2.01	0			2.23	3.35	0			2.37	2.37	0	5.47	0	4.28			6.68			1	1			1	2	1			2	3	1	2	1
FALSE	High	Master Protein	A0A087ZNZ2	Aminotran_1_2 domain-containing protein OS=Apis mellifera OX=7460 GN=LOC409196 PE=4 SV=1		0	FALSE	145.82	57	25	154	25	543	60.8	8.32	37.23	8.63	12.94			54.1	15.33	5.27	0	1.61	57.03	24.08	5.7	41.07	5.65	34.94	31.62	16.51	10.53	16.45	11	3	6			12	6	3	1	1	14	9	3	11
FALSE	High	Master Protein	A0A088AJ72	AMP-binding domain-containing protein OS=Apis mellifera OX=7460 GN=bgm PE=4 SV=1		0	FALSE	85.883	35	17	103	17	687	76.9	7.36	10.07	21.77	12.67		2.49	22.85	24.03	39.1		1.63	28.08	14.38	14.04	8.61	8.51	2.64	16.01	19.59	3.92	2.78	3	7	6		4	7	6	11		1	8	4	5	4
FALSE	High	Master Protein	A0A087ZV52	AMP-binding domain-containing protein OS=Apis mellifera OX=7460 GN=LOC409515 PE=4 SV=1		0	FALSE	123.277	38	23	180	23	715	80.8	8.32	21.75	52.63	30.6	1.69	5.24	23.61	36.46	49.71		12.95	23.94	20.26	23.65	21.3	15.66	31.38	8.12	39.04	9.74	23.21	7	13	9	1	4	8	10	12		5	7	7	9	7
FALSE	High	Master Protein	A0A088AEI4	AMP-binding domain-containing protein OS=Apis mellifera OX=7460 GN=LOC412541 PE=4 SV=1		0	FALSE	8.855	2	1	6	1	657	73.5	8.07		3.13						7.83			3.22		3.53									1						1			1		1
FALSE	High	Master Protein	A0A087ZYX1	AMPKBI domain-containing protein OS=Apis mellifera OX=7460 GN=alc PE=4 SV=1		0	FALSE	16.459	12	2	12	2	283	31.8	7.25		3.24		0			6.57	2.93		0	3.05		3.34	3.33	0			0	0			1		1			1	1		1	1		1	1
FALSE	High	Master Protein	A0A088APR9	ANK_REP_REGION domain-containing protein OS=Apis mellifera OX=7460 GN=LOC551350 PE=4 SV=1		0	FALSE	9.372	28	2	2	2	124	13.8	5.3						2.1											4.48									1
FALSE	High	Master Protein	A0A088AJG3	ANK_REP_REGION domain-containing protein OS=Apis mellifera OX=7460 GN=LOC551954 PE=4 SV=1		0.003	FALSE	3.386	12	1	11	1	226	24.8	5.9	0	2.07				0	0				0			0			0				1	1				1	1				1			1
FALSE	High	Master Protein	A0A087ZQN0	ANK_REP_REGION domain-containing protein OS=Apis mellifera OX=7460 PE=4 SV=1		0	FALSE	6.041	4	2	2	2	801	88.7	5.6	2.32					0															1					1
FALSE	High	Master Protein	A0A088A1W4	Annexin OS=Apis mellifera OX=7460 GN=LOC409068 PE=3 SV=1		0	FALSE	82.374	31	16	81	16	508	56.5	5.55	12.42	1.83		0	2.24	22.51	2.17	2.57		0	26.86	6.14	0	12.99	0	27.94	21.98	18.34	7.19	4.1	5	2		1	1	8	1	2		1	8	2	1	4
FALSE	High	Master Protein	A0A088AJH1	Annexin OS=Apis mellifera OX=7460 GN=LOC409533 PE=3 SV=1		0	FALSE	258.035	79	28	414	27	323	35.9	4.74	52.36	29.78	16.19	15.84	17.04	197.43	18.97	23.01	22.87	9.37	178.59	46.15	10.03	99.21	14.53	180.82	160.36	65.06	23.98	103.3	9	5	4	5	3	23	4	5	8	3	23	8	2	20
FALSE	High	Master Protein	A0A087ZR92	Annexin OS=Apis mellifera OX=7460 PE=3 SV=1		0	FALSE	192.788	63	19	275	18	323	35.7	5.48	25.08	53.37	22.67	9.74	13.67	93.37	22	42.59	5.92	12.81	121.01	35.33	16.3	44.49	13.13	62.27	80.04	18.67	5.97	74.32	8	10	7	4	5	11	7	11	3	4	15	6	6	10
FALSE	High	Master Protein	Q8I6X7	Antennal-specific protein 3c OS=Apis mellifera OX=7460 GN=ASP3c PE=2 SV=1		0	FALSE	50.807	45	8	190	8	130	14.9	7.68	28.99	19.11	19.96	15.19	10.11	18.4	16.27	11.31	31.34	4.01	14.84	17.67		10.32	2.71	13.74	15.14	12.45	10.28	27.26	7	4	7	7	3	6	4	3	6	1	4	4		4
FALSE	High	Master Protein	A0A088AH86	AP complex subunit beta OS=Apis mellifera OX=7460 PE=3 SV=1		0	FALSE	79.735	27	17	61	17	918	101.3	5.27	13.73	14.04	2.37	1.78	1.67	18.63	21.74	5.15		2.12	27.23	5.84	6.09	4.47	2.21	3.49	5.59	4.61	1.92	3.06	4	3	2	1	1	5	5	2		1	5	3	2	3
FALSE	High	Master Protein	A0A088ACY2	AP-1 complex subunit gamma OS=Apis mellifera OX=7460 PE=3 SV=1		0	FALSE	9.515	4	3	3	3	809	90.2	7.96	2.09						3.37				2.12										1						1				1
FALSE	High	Master Protein	A0A088APJ2	AP-2 complex subunit alpha OS=Apis mellifera OX=7460 GN=alpha-Adaptin PE=3 SV=1		0	FALSE	46.848	17	12	40	12	937	104.9	7.21	6.13	9.57				8.77	2.38	3.59		0	14.24	7.42		5.72		5.55	2.6	9.56	7.3	10.54	3	2				3	2	1		2	4	1		2
FALSE	High	Master Protein	A0A088A8Q2	AP-3 complex subunit beta OS=Apis mellifera OX=7460 GN=LOC552064 PE=3 SV=1		0.003	FALSE	3.542	1	1	2	1	1049	117.6	6.32						1.61					1.88															1					1
FALSE	High	Master Protein	A0A088ANC5	APD-3-like protein; Apidermin 1-like protein; Apidermin 3-like protein OS=Apis mellifera OX=7460 GN=apd-3 PE=4 SV=1		0	FALSE	60.088	27	3	104	3	275	24.2	7.56	25.6	13.23	31.89	32.45	108.7	4.78	9.45	5.14	18.5	52.3	27.11	4.04	9.36	10.58	12.54	10.57	14.35	9.49	10.93	8.27	3	2	3	3	3	1	2	1	2	2	2	1	2	2
FALSE	High	Master Protein	B0LUE8	Apolipophorin-III-like protein OS=Apis mellifera OX=7460 GN=A4 PE=2 SV=1		0	FALSE	23.314	34	4	43	4	193	21.3	5.66	7.94		6.23	1.88	5.91	9.19		9.8	6.83	4.63	20.35		2.21	7.43	4.08	5.18	2.01		2.72	4.7	3		3	1	2	3		3	3	2	4		1	2
FALSE	High	Master Protein	A0A088AB14	Arf-GAP domain-containing protein OS=Apis mellifera OX=7460 GN=LOC409617 PE=4 SV=1		0.001	FALSE	5.133	5	2	2	2	545	60.6	8.38	0					0															1					1
FALSE	High	Master Protein	A0A088ARZ8	Arginine kinase OS=Apis mellifera OX=7460 PE=3 SV=1		0	FALSE	392.387	77	35	945	35	383	43.4	6.55	135.31	140.22	46.03	53.13	17.48	250.5	120.28	67.83	54.59	19.01	224.33	152.32	75.19	158.08	29.38	462.34	165.14	149.5	53.47	263.19	18	21	13	13	7	27	21	14	13	7	23	22	16	24
FALSE	High	Master Protein	A0A088AM48	Arp2/3 complex 34 kDa subunit OS=Apis mellifera OX=7460 GN=Arc-p34 PE=3 SV=1		0	FALSE	9.567	6	2	9	2	306	35.8	7.68	2.54	2.9				4.41					3.15			4.46				0		0	1	1				2					1			2
FALSE	High	Master Protein	A0A087ZUT4	Arrestin_C domain-containing protein OS=Apis mellifera OX=7460 GN=409006 PE=4 SV=1		0	FALSE	15.268	3	1	9	1	492	54.2	5.62	3.68	3.07					3.04		2.04		2.01			2.34		2.49		3.85			1	1					1		1		1			1
FALSE	High	Master Protein	A0A088AH00	Arrestin_C domain-containing protein OS=Apis mellifera OX=7460 GN=ArrL2 PE=4 SV=1		0	FALSE	41.203	32	7	50	7	338	37.7	8.81	9.03	6.69	7.91	4.66	7.92	9.75	9.58	11.69	1.88	13.22	9.78	5.56	13.28	13	11.36					0	2	1	2	2	2	2	2	3	2	3	2	2	3	3
FALSE	High	Master Protein	A0A088A4B2	Aspartate aminotransferase OS=Apis mellifera OX=7460 GN=Got2 PE=4 SV=1		0	FALSE	159.642	57	22	215	22	429	48	9.22	53.97	39.04	41.5			77.82	38.66	31.38			56.67	31.06	41.73	48.33	42.33	25.34	44.39	47.49	5.84	38.34	13	9	13			15	10	9			13	9	9	9
FALSE	High	Master Protein	A0A088ASL4	Aspartate aminotransferase OS=Apis mellifera OX=7460 PE=4 SV=1		0	FALSE	155.278	79	18	198	18	365	41.5	7.24	12.52	54.07	15.43	4.51	2.5	73.93	72.03	44.51	7.12	11.98	89.24	61.21	33.16	27.27	10.22	6.02	14.48	22.28	1.97	43.31	4	9	4	2	1	12	11	8	4	3	16	11	7	8
FALSE	High	Master Protein	M9SXX0	ATP synthase alpha subunit (Fragment) OS=Lactobacillus apis OX=303541 GN=atpA PE=4 SV=1		0	FALSE	24.293	8	2	221	1	303	32.8	5.06	18.83	15.66	21.42	9.91	9.68	26.57	15.75	15.15	12.14	16	15.46	21.84	13.27	21.65	18.79	22.96	12.2	153.44	69.9	156.95	1	1	1	1	1	1	1	1	1	1	1	2	1	1
FALSE	High	Master Protein	A0A343ITD7	ATP synthase subunit a OS=Apis mellifera syriaca OX=279977 PE=4 SV=1		0	FALSE	6.994	8	2	29	2	226	26.6	8.94		8.36	4.31	0	5.73		3.57	6.07			4.09	2.62	8.03	4.52	2							2	2	1	2		2	2			2	1	2	2
FALSE	High	Master Protein	A0A087ZQI5	ATP synthase subunit alpha OS=Apis mellifera OX=7460 GN=Atp5a1 PE=3 SV=1		0	FALSE	373.426	74	36	1803	35	547	59.5	8.9	256.93	249.3	258.66	125.69	168.18	277.97	234.55	251.85	135.38	200.78	232.47	204.92	234.26	208.67	201.38	438.88	142.81	604.12	403.58	584.66	25	23	25	22	24	27	24	25	19	22	23	22	25	22
FALSE	High	Master Protein	A0A088AMB8	ATP synthase subunit beta OS=Apis mellifera OX=7460 GN=Atp5b PE=3 SV=1		0	FALSE	677.187	82	33	2956	33	516	55.1	5.41	509.35	418.32	488.72	238.16	297.37	595.38	428.08	503.4	362.34	399.61	490.97	371.39	477.82	431.62	415.52	1020.44	369.96	971.03	502.44	1064.01	27	28	27	25	25	31	30	30	29	29	28	28	28	27
FALSE	High	Master Protein	A0A087ENJ2	ATP synthase subunit beta OS=Lactobacillus kunkeei OX=148814 GN=atpD PE=3 SV=1		0	FALSE	25.247	14	4	50	4	468	50.9	4.75	8.91	16.28	12.99	8.84	2.76	9.34	10.64	13.14	5.9	10.05	5.57	14.97	5.9	12.15	14.57						1	2	2	2	1	2	2	2	2	2	1	3	1	2
FALSE	High	Master Protein	A0A087ZS51	ATP synthase subunit d, mitochondrial OS=Apis mellifera OX=7460 GN=ATPsyn-d PE=3 SV=1		0	FALSE	162.476	79	16	521	16	174	20.3	5.12	90.59	99.21	97.53	28.33	43.38	107.02	84.3	116.77	45.15	76.37	93.21	87.7	99.73	85.2	78.84	71.88	76.95	54.81	31.65	18.16	11	11	13	7	8	12	12	13	9	11	11	10	12	10
FALSE	High	Master Protein	A0A088ACY7	ATP synthase subunit gamma OS=Apis mellifera OX=7460 GN=Atp5c1 PE=3 SV=1		0	FALSE	145.354	50	15	482	15	296	32.8	9.42	79.37	63.52	89.78	42.01	57.69	102.91	65.17	85.01	27.21	68.09	75.24	53.64	86.03	62.44	63.76	113.35	25.6	102.09	38.75	34.2	11	12	13	8	9	13	11	12	7	9	11	8	12	11
FALSE	High	Master Protein	A0A088A2G0	ATP synthase subunit OS=Apis mellifera OX=7460 PE=3 SV=1		0	FALSE	30.554	47	6	223	6	107	12.2	9.83	30.7	27.43	27.94	7.92	17.66	20.37	15.71	29.06	3.83	28.2	25.64	18.83	20.76	26.75	19.45	19.24		20.87	9.17	8.01	5	6	5	4	6	5	5	6	2	6	5	5	5	5
FALSE	High	Master Protein	A0A087ZY48	ATPase ASNA1 homolog OS=Apis mellifera OX=7460 GN=LOC409264 PE=3 SV=1		0	FALSE	40.8	35	8	22	8	339	38.3	5.29	2.54				0	3.94	2.07				11.83	2.58	2.49	5.68		1.98	2.98	2.16	0	0	1				1	3	1				4	1	1	2
FALSE	High	Master Protein	A0A088ARD2	ATP-citrate synthase OS=Apis mellifera OX=7460 GN=ATPCL PE=3 SV=1		0	FALSE	336.736	59	50	398	50	1086	120	7.74	53.58	28.74	20.02	10.27	20.97	152.79	40.9	49.19	0	5.03	165.45	138.79	55.77	90.71	25.75	36.56	38.35	65.31	41.81	34.92	18	9	7	4	7	34	13	16	2	3	33	26	18	23
FALSE	High	Master Protein	A0A087ZNI5	ATP-dependent (S)-NAD(P)H-hydrate dehydratase OS=Apis mellifera OX=7460 PE=3 SV=1		0	FALSE	28.488	22	4	24	4	350	38.4	9.28	2.37	7.17	0			13.68	19.32	2.73			16.56	2.97	3.58				5.54	1.8			1	1	1			1	2	1			4	1	1
FALSE	High	Master Protein	C5CAX2	ATP-dependent Clp protease ATP-binding subunit ClpX OS=Micrococcus luteus (strain ATCC 4698 / DSM 20030 / JCM 1464 / NBRC 3333 / NCIMB 9278 / NCTC 2665 / VKM Ac-2230) OX=465515 GN=clpX PE=3 SV=1		0.001	FALSE	4.69	3	1	1	1	432	46.9	5.06												2.68																				1
FALSE	High	Master Protein	A0A087ZVI9	ATP-dependent Clp protease proteolytic subunit OS=Apis mellifera OX=7460 GN=LOC409011 PE=3 SV=1		0	FALSE	12.836	6	1	14	1	237	26.3	8.63						3.69	2.6		2.24		5.8	2.52	2.63		0	5.46		2.97	0	3.32						1	1		1		1	1	1
FALSE	High	Master Protein	A0A087ZZ68	ATP-grasp_2 domain-containing protein OS=Apis mellifera OX=7460 PE=4 SV=1		0	FALSE	11.858	17	4	4	4	322	36.1	5.66											2.21					2.61		2.36		2.48											1
FALSE	High	Master Protein	A0A088AHV3	ATP-synt_DE_N domain-containing protein OS=Apis mellifera OX=7460 GN=Atp5d PE=3 SV=1		0	FALSE	76.154	55	7	146	7	161	17.6	5.17	31.81	21.68	40.58		6.1	39.47	38.12	45.39	43.81	27.45	20.91	23.9	26.8	15.89	27.96	3.66	52.42	9.17		3.04	5	5	6		2	6	7	7	7	5	5	4	5	4
FALSE	High	Master Protein	A0A088AN03	B5 domain-containing protein OS=Apis mellifera OX=7460 GN=LOC551101 PE=4 SV=1		0.002	FALSE	3.934	2	1	1	1	590	67.5	6.29							2.52																				1
FALSE	High	Master Protein	A0A088APR0	Bac_surface_Ag domain-containing protein OS=Apis mellifera OX=7460 GN=LOC413450 PE=4 SV=1		0	FALSE	62.04	29	12	106	12	483	54	9.09	24.31	16.28	21.16	9.15	11.92	16.98	18.92	20.49	2.87	15.52	12.17	10.78	19.44	14.9	16.77	5.21	2.6	9.34	3.42	7.75	5	3	7	3	5	6	6	5	1	6	4	3	5	5
FALSE	High	Master Protein	A0A088ARD5	BAG domain-containing protein OS=Apis mellifera OX=7460 GN=LOC727486 PE=4 SV=1		0	FALSE	10.591	5	3	3	3	707	81.8	6.05							2.95										2.4			1.97							1
FALSE	High	Master Protein	A0A088A3V9	Beta-galactosidase OS=Apis mellifera OX=7460 GN=LOC725756 PE=3 SV=1		0.001	FALSE	4.824	2	1	3	1	644	73	6.38						2.33					2.05	1.72														1					1	1
FALSE	High	Master Protein	A0A088AJN6	Beta-glucuronidase OS=Apis mellifera OX=7460 GN=LOC409814 PE=3 SV=1		0	FALSE	29.905	14	7	15	7	669	76.9	6.11	4.05				2.07	3.94		5.89							1.9	4.59	6.78	2.65	2.3	4.94	2				1	1		2
FALSE	High	Master Protein	A0A087ZUU5	Beta-hexosaminidase OS=Apis mellifera OX=7460 PE=3 SV=1		0	FALSE	15.317	12	4	4	4	541	61.3	6.99	2.39		2.38			4.06														2.4	1		1			1
FALSE	High	Master Protein	A0A088A206	BRCT domain-containing protein OS=Apis mellifera OX=7460 GN=100576717 PE=4 SV=1		0	FALSE	8.366	2	2	2	2	1389	156.3	5.31							2.08											1.72									1
FALSE	High	Master Protein	A0A088ANI4	BRO1 domain-containing protein OS=Apis mellifera OX=7460 GN=ALiX PE=4 SV=1		0	FALSE	100.322	30	19	64	19	816	91.6	5.77	10.08	9.88				19.42	3.99	2.48	0		37.49	0	0	9.98		8.78	18.18	6.51	9.25	3.15	4	3				7	2	1	2		11	1	1	4
FALSE	High	Master Protein	A0A088ALI7	BSD domain-containing protein OS=Apis mellifera OX=7460 GN=726924 PE=4 SV=1		0	FALSE	9.651	6	2	3	2	438	47.4	4.56						2.97			2.19								2.92									1			1
FALSE	High	Master Protein	A0A088ABD2	BTB domain-containing protein OS=Apis mellifera OX=7460 PE=4 SV=1		0.001	FALSE	5.29	3	1	10	1	429	48.7	9.17		5.04	2.41			3.18	2.75	2.79		2.47	2.56	2.72	3									1	1			1	1	1		1	1	1	1
FALSE	High	Master Protein	A0A088AWA1	C2 domain-containing protein OS=Apis mellifera OX=7460 GN=LOC724498 PE=4 SV=1		0	FALSE	20.415	19	7	16	7	409	46	9.61				1.71	10.15				3.34				3.4	5.45		2.06		1.7		0				1	5				2				2	2
FALSE	High	Master Protein	A0A087ZTJ1	C2H2-type domain-containing protein OS=Apis mellifera OX=7460 GN=LOC408565 PE=4 SV=1		0	FALSE	12.386	7	3	13	3	761	85.7	6.71		4.21				4.64	6.73			1.83	0			2.1				0				2				1	2			1	1			1
FALSE	High	Master Protein	A0A087ZQ49	CAAX prenyl protease OS=Apis mellifera OX=7460 GN=LOC551466 PE=3 SV=1		0	FALSE	19.04	13	5	17	5	442	52.1	7.77		8.98	0		0		8.88	7.56		4.73			10.64	5.36		2.06		4.82				1	1		1		1	2		1			2	2
FALSE	High	Master Protein	A0A088AAI1	Calcium load-activated calcium channel OS=Apis mellifera OX=7460 GN=LOC552501 PE=3 SV=1		0	FALSE	11.73	8	1	37	1	183	21.1	9.6	12.4	16.39	10.19	5.39	5.72	11.64	12.91	9.2	0	8.99	12.08	7.62	9.16	8.47	7.29						1	1	1	1	1	1	1	1	1	1	1	1	1	1
FALSE	High	Master Protein	A0A088ACZ9	Calcium-transporting ATPase OS=Apis mellifera OX=7460 GN=LOC410371 PE=3 SV=1		0	FALSE	719.405	51	56	2693	56	1002	110	5.64	540.84	470.36	535.23	273.88	222.43	511.32	343.38	558.2	153.69	419.51	457.88	378.38	515.29	462.71	318.34	648.61	195.76	343.79	277	251.4	47	43	51	42	38	46	41	52	35	47	46	38	49	44
FALSE	High	Master Protein	A0A087ZYD1	Calcium-transporting ATPase OS=Apis mellifera OX=7460 PE=3 SV=1		0	FALSE	340.411	41	39	554	39	1080	119.2	8.24	96.61	85.66	94.81	52.63	39.65	103.52	58.92	127.34	15.48	78.03	88.04	76.24	120.55	101.98	62.1	89.45	29.21	104.33	70.62	50.46	21	22	24	16	12	21	17	26	8	19	21	17	23	21
FALSE	High	Master Protein	A0A088ADK9	Calmodulin kinase II OS=Apis mellifera OX=7460 PE=4 SV=1		0	FALSE	23.49	12	4	9	4	576	64.3	7.68	2.39					12.38	5.81	5.91			5.64		5.38			2.27					1					3	1	1			1		1
FALSE	High	Master Protein	A0A088AF78	Calponin OS=Apis mellifera OX=7460 GN=LOC408532 PE=3 SV=1		0	FALSE	109.497	72	14	262	14	169	19.1	8.4	51.68	33.34	31.06	40.47	13.1	67.71	27.99	33.08	67.56	5.46	64.21	23.74	11.9	30.35	16.48	74.42	39.46	23.19	37.66	15.02	7	6	5	8	5	8	6	8	8	2	8	6	4	5
FALSE	High	Master Protein	A0A088AJ37	Calponin-homology (CH) domain-containing protein OS=Apis mellifera OX=7460 GN=LOC412262 PE=4 SV=1		0.002	FALSE	4.102	2	1	2	1	701	81.5	5.6						3.29								2.01												1								1
FALSE	High	Master Protein	A0A088AIY0	Calponin-homology (CH) domain-containing protein OS=Apis mellifera OX=7460 PE=4 SV=1		0	FALSE	102.675	10	13	114	13	1514	172.3	7.97	29.48	21.98	7.35	6.25	6.43	51.29	33.87	19.54	12.01	10.28	50.51	23.95	20.55	25.71	6.06	2.12	26.27	6.18			5	4	1	1	1	11	8	4	4	2	10	5	5	6
FALSE	High	Master Protein	A0A087ZZA9	Calponin-homology (CH) domain-containing protein OS=Apis mellifera OX=7460 PE=4 SV=1		0	FALSE	10.071	15	2	14	1	158	18.2	9.99	2.78	5.23	2.82			2.88	4.9				1.94		2.64	2.5	3.01	2.92		2.31	2.63		1	1	1			1	2				1		1	1
FALSE	High	Master Protein	A0A087ZYU9	Calponin-homology (CH) domain-containing protein OS=Apis mellifera OX=7460 PE=4 SV=1		0	FALSE	14.054	18	2	9	2	184	21.6	8.92			3.91	2.24						6.63	3.38	2.19		2.62	2.25								1	1						2	1	1		1
FALSE	High	Master Protein	A0A087ZYV0	Calponin-homology (CH) domain-containing protein OS=Apis mellifera OX=7460 PE=4 SV=1		0	FALSE	196.002	35	36	200	36	1316	152.5	6.77	33.48	27.75	39.55	19.73	20.05	22.35	24.68	19.54	28.52	27.66	39.23	12.89	39.65	32.14	20.51	25.97	35.28	22.08	16.26	19.93	9	8	13	8	8	7	9	7	14	10	12	5	13	9
FALSE	High	Master Protein	A0A087ZP00	Calreticulin OS=Apis mellifera OX=7460 GN=Crc PE=3 SV=1		0	FALSE	152.803	63	21	130	21	403	47.1	4.6	30.85	10.42	7.77			58.64	8.06	15.66			48.24	17.03		26.39	6.73	31.62	52.25	24.12	1.91	25.91	7	2	3			11	1	3			12	3		7
FALSE	High	Master Protein	Q6ZXJ1	cAMP-dependent protein kinase type II regulatory chain OS=Apis mellifera carnica OX=88217 GN=pkar2 PE=2 SV=1		0	FALSE	106.059	69	18	123	18	383	43.8	5	40.66	28.11	2.19	16.76	4.42	40.96	20.79	10.35	33.01	16.24	23.78	16.18	19.07	21.08	4.79	20.86	6.05	7.6	9.31	9.26	10	6	1	4	1	8	6	3	11	6	4	4	3	5
FALSE	High	Master Protein	A0A088AEZ5	CAP-Gly domain-containing protein OS=Apis mellifera OX=7460 PE=4 SV=1		0	FALSE	13.758	5	4	6	4	1266	142.1	6.01	3.8					3.59					0						3.85				1					1					2
FALSE	High	Master Protein	A0A088A5D7	Carboxylic ester hydrolase OS=Apis mellifera OX=7460 GN=552229 PE=3 SV=1		0	FALSE	112.794	49	19	36	19	553	61.7	4.74											1.64	101.19								2.31											1	19
FALSE	High	Master Protein	A0A088AKG2	Carboxylic ester hydrolase OS=Apis mellifera OX=7460 GN=LOC408395 PE=3 SV=1		0	FALSE	69.425	22	9	32	9	582	65.6	8.16	2.64					20.68	6.01	2.99			9.27	2.84				5.6	27.04	15.28		7.68	1					5	2	1			3	1
FALSE	High	Master Protein	A0A088A7H8	Carboxylic ester hydrolase OS=Apis mellifera OX=7460 GN=LOC409171 PE=3 SV=1		0	FALSE	182.364	64	27	337	27	538	61.2	6.71	62.41	40.4	9.73	0	5.14	117.12	40.83	8.81	15.27	0	121.56	62.37	2.92	74.09	6.31	92.4	66.03	67.26	30.32	47.25	13	10	6	1	4	21	10	4	6	1	23	15	1	16
FALSE	High	Master Protein	A0A088AQ81	Carboxylic ester hydrolase OS=Apis mellifera OX=7460 GN=LOC409801 PE=3 SV=1		0	FALSE	7.845	7	2	2	2	572	65.2	6.54													7.58																				2
FALSE	High	Master Protein	A0A088A9C3	Carboxylic ester hydrolase OS=Apis mellifera OX=7460 GN=LOC726134 PE=3 SV=1		0.002	FALSE	4.491	2	1	1	1	527	58.7	7.46			2.17																				1
FALSE	High	Master Protein	A0A087ZN44	Carboxypeptidase OS=Apis mellifera OX=7460 PE=3 SV=1		0	FALSE	64.432	42	11	106	2	409	46.8	8.85	23.32	15.11	8.57	3.27	7.33	15.63	21.7	15.73	2.18	9.1	29.47	18.24	19.27	18.28	4.59	5.82	10.72	8.01	2.34	5.79	6	5	4	2	3	6	5	5	1	4	6	4	6	5
FALSE	High	Master Protein	A0A088A7X0	Carn_acyltransf domain-containing protein OS=Apis mellifera OX=7460 PE=3 SV=1		0	FALSE	71.565	34	17	50	17	662	76.8	8.72	12.95	4.5	1.67			21.23	13.65	21.05		4.38	19.19	6.34	2.89	5.05	4.9	2.6		8.18		2.13	4	2	1			7	4	6		2	6	4	2	2
FALSE	High	Master Protein	A0A088AP68	Carrier domain-containing protein OS=Apis mellifera OX=7460 GN=LOC412815 PE=4 SV=1		0	FALSE	548.93	43	77	565	77	2388	264.3	6.52	86.03	50.58	1.65	9.1	10.68	263.3	58.31	68.42	8.39	22.46	286.59	136.98	40.66	123.24	21.33	85.05	58.7	109.63	37.08	87.51	21	11	2	6	5	51	16	19	5	7	56	34	12	30
FALSE	High	Master Protein	A0A088ACC2	Casein kinase II subunit beta OS=Apis mellifera OX=7460 GN=CkIIbeta PE=3 SV=1		0	FALSE	30.481	26	4	41	4	227	26.2	6.09	5.86	7.4		2.47	2.1	13.68	7.61	4.68	8.07	7.71	10.99	4.48	8.57	9.24	3.12	3.08	6.84	5.46		3.14	2	2		2	1	4	3	2	3	3	3	1	3	3
FALSE	High	Master Protein	Q6S974	Catalase (Fragment) OS=Apis mellifera ligustica OX=7469 PE=2 SV=1		0	FALSE	38.393	46	6	111	1	182	21.4	6.89	13.03	23.05	13.79	14.84	7.41	21.82	17.25	26.31	4.57	16.75	22.61	23.99	19.2	12.05	2.25	0	14.72				2	3	3	4	3	4	5	4	3	4	4	3	3	3
FALSE	High	Master Protein	A0A087ZRK9	Catalase OS=Apis mellifera OX=7460 PE=3 SV=1		0	FALSE	201.864	66	23	451	18	489	55.3	8.28	74.83	96.13	72.78	84.14	43.84	115.98	99.97	124	43.76	90.56	99.27	103.46	85.47	47.32	25.96	8.84	126.34	27.1		13.86	12	14	14	17	13	18	17	19	15	18	16	16	14	10
FALSE	High	Master Protein	A0A0U6YK03	Catalase-peroxidase OS=Serratia marcescens OX=615 GN=katG PE=3 SV=1		0.001	FALSE	5.093	3	1	1	1	731	79.9	5.5							3.62																				1
FALSE	High	Master Protein	A0A088ALT2	Cation-transporting ATPase OS=Apis mellifera OX=7460 GN=LOC412741 PE=3 SV=1		0.003	FALSE	3.478	2	1	1	1	1164	130.7	7.99							3.13																				1
FALSE	High	Master Protein	A0A087ZPQ1	CDP-diacylglycerol--inositol 3-phosphatidyltransferase OS=Apis mellifera OX=7460 GN=LOC411408 PE=3 SV=1		0.002	FALSE	4.181	5	1	2	1	217	24.9	8			2.62					2.94															1					1
FALSE	High	Master Protein	T1SGQ4	cGMP-dependent protein kinase OS=Apis mellifera OX=7460 PE=2 SV=1		0	FALSE	47.05	17	12	39	12	739	83.5	5.64	7.36					9.46	2.54	0	0		11.46	5.37	0	0	0	6.07	4.42	7.8	4.5	4.14	4					3	1	1	2		4	2	1	3
FALSE	High	Master Protein	A0A1J6XP18	Chaperone protein ClpB OS=Enterococcus faecalis OX=1351 GN=clpB PE=3 SV=1		0	FALSE	9.372	4	2	2	2	868	98	5.15												6.44																				2
FALSE	High	Master Protein	V5T846	Chaperone protein DnaK OS=Bifidobacterium sp. Hma3N OX=1293831 GN=dnaK PE=2 SV=1		0	FALSE	16.53	4	2	17	1	632	67.4	4.88	2.49					2.25	5.2				2.65	19.87	2.31	2.59	2.21	2.27		5.26		1.98	1					1	2				1	2	1	1
FALSE	High	Master Protein	A0A087EP31	Chaperone protein DnaK OS=Lactobacillus kunkeei OX=148814 GN=dnaK PE=2 SV=1		0	FALSE	9.497	5	2	2	2	619	67.1	4.87												5.62																				2
FALSE	High	Master Protein	C5C822	Chaperone protein DnaK OS=Micrococcus luteus (strain ATCC 4698 / DSM 20030 / JCM 1464 / NBRC 3333 / NCIMB 9278 / NCTC 2665 / VKM Ac-2230) OX=465515 GN=dnaK PE=2 SV=1		0.002	FALSE	4.475	3	1	2	1	621	67.1	4.74												7.6																				1
FALSE	High	Master Protein	A0A088A256	Chitin-binding type-2 domain-containing protein OS=Apis mellifera OX=7460 GN=Cda4 PE=4 SV=1		0.001	FALSE	5.559	3	1	1	1	486	55.7	5.81											3.18																				1
FALSE	High	Master Protein	A0A087ZSK4	Chitin-binding type-2 domain-containing protein OS=Apis mellifera OX=7460 GN=LOC411273 PE=4 SV=1		0	FALSE	10.277	5	3	6	3	639	72	8.7			1.64	2.34	2.41								0		0								1	1	1								1
FALSE	High	Master Protein	A0A088A611	Chitin-binding type-2 domain-containing protein OS=Apis mellifera OX=7460 GN=LOC413705 PE=3 SV=1		0.005	FALSE	3.061	2	1	1	1	508	56.1	6.95									3.01																				1
FALSE	High	Master Protein	A0A088A1P7	Chitin-binding type-2 domain-containing protein OS=Apis mellifera OX=7460 GN=verm PE=4 SV=1		0.004	FALSE	3.308	2	1	2	1	549	62.2	5.14	1.67									2.34											1									1
FALSE	High	Master Protein	A0A088ANX6	Chitin-binding type-2 domain-containing protein OS=Apis mellifera OX=7460 PE=4 SV=1		0	FALSE	56.54	13	11	82	11	958	105.9	5.05	12.11	5.64	24.16	17.32	12.95	3.49	7.52	7	11.49	5.64	4.55		1.74	4.29	0	4.35	3.04	12.12	7.39		6	1	7	7	6	1	4	4	8	2	2		1	2
FALSE	High	Master Protein	A0A087ZN59	CHK domain-containing protein OS=Apis mellifera OX=7460 GN=LOC408421 PE=4 SV=1		0	FALSE	144.911	55	24	284	24	401	46.5	7.75	38.69	11.02	7.77	13.49	4.52	85.25	17.23	17.01	34.43	3.2	90.77	49.13	24.98	51.41	9.4	34.51	30.55	33.85	16.12	33.49	11	4	4	9	3	19	5	8	13	2	17	12	6	12
FALSE	High	Master Protein	A0A087ZPX5	CHK domain-containing protein OS=Apis mellifera OX=7460 GN=LOC724536 PE=4 SV=1		0	FALSE	29.098	21	7	10	7	410	48	5.68											0			2.11	7.16																2			1
FALSE	High	Master Protein	A0A087ZTW4	CID domain-containing protein OS=Apis mellifera OX=7460 GN=LOC412928 PE=4 SV=1		0	FALSE	7.831	16	2	2	2	338	38.3	8.28						2.2								0												1								1
FALSE	High	Master Protein	A0A088AKI2	Citrate synthase OS=Apis mellifera OX=7460 GN=LOC410059 PE=3 SV=1		0	FALSE	199.356	62	25	535	25	462	51.9	9	114.16	62.33	115.63	18.99	0	145.74	78.24	69.81	27.58	6.67	109.81	36.41	75.42	107.86	50.64	130.41	57.65	131.57	79.06	143.86	14	12	16	7	1	20	11	12	9	3	15	8	15	15
FALSE	High	Master Protein	A0A088AFV6	Clathrin heavy chain OS=Apis mellifera OX=7460 GN=LOC550716 PE=3 SV=1		0	FALSE	355.866	42	49	419	49	1678	192	5.94	80.89	89.33	15.91	15.78	34.05	128.23	110.02	108.9	6.59	71.39	141.43	64.09	57.32	83.31	58.42	13.4	54.2	24.19	15.02	45.36	20	22	6	7	13	28	24	26	4	20	28	15	16	20
FALSE	High	Master Protein	A0A087ZRM7	Clathrin light chain OS=Apis mellifera OX=7460 GN=Clc PE=3 SV=1		0	FALSE	13.001	11	2	9	2	209	23.5	4.79		1.8				1.78	1.69	0			4.28					3.27	0	4.85				1				1	1	1			2
FALSE	High	Master Protein	A0A088A0J5	Cleavage and polyadenylation specificity factor subunit 5 OS=Apis mellifera OX=7460 GN=LOC552140 PE=3 SV=1		0	FALSE	21.616	21	3	12	3	228	26.1	8.85	0	5.13	2.89			4.57		2.63		0	2.97					2.71		3.14			1	2	1			2		1		1	1
FALSE	High	Master Protein	A0A087EN82	Clp protease ClpX OS=Lactobacillus kunkeei OX=148814 GN=JI66_06205 PE=3 SV=1		0	FALSE	12.78	8	3	3	3	698	77.2	5.16												7.68																				3
FALSE	High	Master Protein	A0A1Q4NV70	ClpV1 family T6SS ATPase OS=Serratia marcescens OX=615 GN=BHU62_20930 PE=4 SV=1		0.002	FALSE	4.04	1	1	3	1	885	98	5.29							2.3					5.59															1					1
FALSE	High	Master Protein	L2GM70	CMGC/GSK protein kinase OS=Vittaforma corneae (strain ATCC 50505) OX=993615 GN=VICG_00958 PE=3 SV=1		0.004	FALSE	3.232	3	1	1	1	318	37.1	8.98																		2.11
FALSE	High	Master Protein	A0A088ALI4	Coatomer subunit alpha OS=Apis mellifera OX=7460 GN=alphaCop PE=4 SV=1		0	FALSE	6.083	2	2	3	2	1214	137.9	7.36						0					2.77					1.81										1					1
FALSE	High	Master Protein	A0A088A977	Coatomer subunit beta OS=Apis mellifera OX=7460 GN=betaCop PE=4 SV=1		0	FALSE	15.44	4	3	7	3	949	104.7	6.07						2.7		0			2.11		2.4	2.41						6.73						1		1			1		1	1
FALSE	High	Master Protein	A0A087ZY82	Coatomer subunit beta' OS=Apis mellifera OX=7460 PE=3 SV=1		0	FALSE	12.636	4	3	5	3	899	101.3	5.96	0						2.12	2.27			2.3							2.31			1						1	1			1
FALSE	High	Master Protein	A0A088AGY8	Coatomer subunit delta OS=Apis mellifera OX=7460 GN=deltaCOP PE=3 SV=1		0	FALSE	11.031	7	3	8	3	515	57.8	5.62						2.28	2.2	2.2				0		2.5				1.98	2.65	3.42						1	1	1				1		1
FALSE	High	Master Protein	A0A088A207	Coatomer subunit epsilon OS=Apis mellifera OX=7460 PE=3 SV=1		0	FALSE	18.659	18	4	8	4	300	34.7	5.55						0					2.26		0			2.73	3.05	2.09	3.26							1					1		1
FALSE	High	Master Protein	A0A088AII7	Coatomer subunit gamma OS=Apis mellifera OX=7460 GN=gammaCop PE=3 SV=1		0	FALSE	36.785	13	8	27	8	876	96.4	5.58	3.7	3.21	0		2.61	12.64	7.75	0			14.77	8.91	2.42	4.84	0	2.07			0		1	1	1		1	4	2	1			4	2	1	1
FALSE	High	Master Protein	A0A088A211	COesterase domain-containing protein OS=Apis mellifera OX=7460 GN=Gli PE=4 SV=1		0.001	FALSE	4.796	3	1	2	1	863	99	8.35						0											3.04									1
FALSE	High	Master Protein	A0A088ABF6	COesterase domain-containing protein OS=Apis mellifera OX=7460 GN=LOC410187 PE=4 SV=1		0.001	FALSE	4.914	6	2	2	2	653	73.3	9.1													0																				2
FALSE	High	Master Protein	A0A088A3U7	Collagen IV NC1 domain-containing protein OS=Apis mellifera OX=7460 GN=LOC408551 PE=4 SV=1		0	FALSE	168.082	11	17	933	17	1833	183.2	6.98	114.9	108.58	74.47	120.26	111.11	102.01	69.93	100.74	99.73	111.62	84.42	73.22	75.89	80.31	73.93	70.2	30.46	202.24	167.84	241.06	10	10	9	14	12	10	10	10	9	11	10	6	9	10
FALSE	High	Master Protein	A0A088A3X0	Collagen IV NC1 domain-containing protein OS=Apis mellifera OX=7460 GN=LOC408552 PE=4 SV=1		0	FALSE	365.707	14	25	1384	25	1929	190.9	7.09	322.63	218.51	211.67	351.92	306.27	214.23	228.76	234.55	226.8	262.51	252.49	189.56	209.46	174.65	175.96	300.26	149.67	267.52	250.51	257.79	15	13	14	19	20	13	13	14	17	14	13	11	14	13
FALSE	High	Master Protein	A0A087ER82	Collagen_bind domain-containing protein OS=Lactobacillus kunkeei OX=148814 GN=JI66_00585 PE=4 SV=1		0.004	FALSE	3.164	4	1	1	1	384	43.1	6.54												2.25																				1
FALSE	High	Master Protein	A0A088A6D6	Complex1_30kDa domain-containing protein OS=Apis mellifera OX=7460 GN=Ndufs3 PE=3 SV=1		0	FALSE	110.077	55	13	171	13	261	30.5	6.06	59.88	68.7	37.64	13.38	17.63	41.66	35.64	51.12	2	25.74	30.73	19.11	39.89	22.24	20.48	8.49	23.65	9.57	13.37	19.31	9	10	8	2	3	7	7	8	2	6	6	5	10	6
FALSE	High	Master Protein	A0A087ZNK1	Complex1_49kDa domain-containing protein OS=Apis mellifera OX=7460 GN=Ndufs2 PE=3 SV=1		0	FALSE	157.12	50	19	238	19	480	55.4	6.76	50.63	57.18	57.35	20.24	30.48	50.28	42.55	61.09	5.09	50.56	27.02	32.59	51.47	28.31	29.22	14.72	6.11	17.52	12.96	36.8	10	12	14	7	8	11	10	13	4	9	8	9	12	8
FALSE	High	Master Protein	A0A087ZSK9	Coronin OS=Apis mellifera OX=7460 GN=LOC412080 PE=3 SV=1		0	FALSE	48.462	28	10	31	10	494	54.8	6.54	5.89	2.33				14.78	2.38		2.02	1.87	5.83	2.39	2.79	2.56		4.75		0	2.61	11.75	3	1				5	2		1	1	3	1	1	1
FALSE	High	Master Protein	A0A088AJN1	Corrinoid adenosyltransferase OS=Apis mellifera OX=7460 GN=LOC552180 PE=3 SV=1		0	FALSE	9.657	12	2	3	2	226	25.5	7.87						3.79	0												2.37							1	1
FALSE	High	Master Protein	A0A088AD70	Costars domain-containing protein OS=Apis mellifera OX=7460 GN=LOC410370 PE=4 SV=1		0.006	FALSE	2.9	7	1	1	1	168	19.3	7.87							1.9																				1
FALSE	High	Master Protein	A0A087ZR60	COX assembly mitochondrial protein OS=Apis mellifera OX=7460 GN=LOC552802 PE=3 SV=1		0.005	FALSE	2.981	11	1	2	1	123	14.3	9.06						3.05		0																		1		1
FALSE	High	Master Protein	A0A088A2Z3	COX assembly mitochondrial protein OS=Apis mellifera OX=7460 GN=Ndufs5 PE=3 SV=1		0	FALSE	15.681	36	3	20	3	106	12.6	6.16	3.88		6.73	2.6	5.95		3.56			0	6.41	10.05	9.36	3.92	4.01		3.1			2.85	1		1	1	1		1			1	1	2	2	1
FALSE	High	Master Protein	A0A088AI62	COX6C domain-containing protein OS=Apis mellifera OX=7460 GN=Cox6c PE=4 SV=1		0	FALSE	23.422	81	6	88	6	75	8.8	9.16	15.33	6.88	14.43	4.4	10.76	5.85	9.01	8.92	3.8	12.26	8.28	4.31	13.3	8.49	3.93		2.69	6.09	1.63	0	5	2	4	4	5	3	3	3	3	3	2	2	3	2
FALSE	High	Master Protein	A0A088A0Z8	CPSF_A domain-containing protein OS=Apis mellifera OX=7460 PE=4 SV=1		0	FALSE	6.242	1	1	1	1	1271	141.5	5.48																				2.16
FALSE	High	Master Protein	A0A088A1C5	CRAL-TRIO domain-containing protein OS=Apis mellifera OX=7460 GN=408361 PE=4 SV=1		0	FALSE	7.309	9	2	3	2	306	35.6	8.51					0											3.17			0						1
FALSE	High	Master Protein	A0A088ADH8	CRAL-TRIO domain-containing protein OS=Apis mellifera OX=7460 GN=LOC409740 PE=4 SV=1		0	FALSE	61.964	46	14	127	14	310	36.2	8.59	11.12	11.15	6.83	16.97	15.35	16.9	17.91	11.53	8.98	2.73	8.86		10.57	19.12	13.3	22.73	15.15	42.75	22.44	9.58	4	5	3	6	5	6	6	5	4	2	3		4	6
FALSE	High	Master Protein	A0A088AC27	CRAL-TRIO domain-containing protein OS=Apis mellifera OX=7460 PE=4 SV=1		0	FALSE	12.178	13	3	4	3	279	32.4	6.9			5.23																	2.93			3
FALSE	High	Master Protein	A0A088ARS8	CS domain-containing protein OS=Apis mellifera OX=7460 PE=4 SV=1		0.002	FALSE	4.069	9	2	7	2	176	20.1	4.46		0				4.15			1.82		2.04			1.84						1.85		1				1			1		1			1
FALSE	High	Master Protein	A0A088ARR5	CSD_1 domain-containing protein OS=Apis mellifera OX=7460 GN=yps PE=4 SV=1		0	FALSE	23.928	14	3	37	3	279	30.2	9.95	10.75	11.61	1.69		1.91	10.55	16.57	5.46	7.35	5.34	8.02		2.23	1.81	0	5.26	0	13.04			3	2	1		1	3	2	2	2	2	2		1	1
FALSE	High	Master Protein	A0A088AE32	CTLH domain-containing protein OS=Apis mellifera OX=7460 PE=4 SV=1		0.002	FALSE	4.309	4	1	2	1	330	36.8	5.53						3.26										3.61										1
FALSE	High	Master Protein	A0A088AKE3	C-type lectin domain-containing protein OS=Apis mellifera OX=7460 GN=100578121 PE=4 SV=1		0	FALSE	38.759	22	7	61	7	315	37.2	9.91	2.27		12.14	16.72	15.76	0	0	9.65		10.33	8.38	7.83	15.6	4.08	14.04				2.59		1		3	3	4	2	2	4		3	3	2	4	2
FALSE	High	Master Protein	A0A088ACU2	C-type lectin domain-containing protein OS=Apis mellifera OX=7460 GN=CTL1 PE=4 SV=1		0	FALSE	21.768	10	3	12	3	429	47.6	4.61	6.92													3.01		8.18			4.38	0	2													1
FALSE	High	Master Protein	A0A087ZXS4	C-type lectin domain-containing protein OS=Apis mellifera OX=7460 GN=CTL11 PE=4 SV=1		0	FALSE	44.048	47	7	91	6	219	25.3	7.36	11.46	5.22	3.26	16.51	7.45	4.77	0	8.55	6.22	6.32	16.76	7.74	12.5	11.12	13.02	5.93	3.22	3.44	3.76	3.1	3	1	1	4	2	1	1	2	2	2	6	2	3	3
FALSE	High	Master Protein	A0A087ZNY6	C-type lectin domain-containing protein OS=Apis mellifera OX=7460 GN=CTL5 PE=4 SV=1		0	FALSE	181.199	71	11	803	10	217	25	8.32	162.54	124.77	163.36	164.34	186.33	118.99	79.83	142.05	115.8	119.98	101.96	69.39	88.23	99.44	109.12	96.8	64.56	106.35	86.59	30.21	11	11	11	11	11	9	8	10	10	10	10	8	9	10
FALSE	High	Master Protein	A0A088AM42	C-type lectin domain-containing protein OS=Apis mellifera OX=7460 PE=4 SV=1		0	FALSE	104.947	55	9	585	9	231	26.8	7.36	68.85	68.44	105.45	105.08	111.08	64.3	61.14	84.45	73.05	74.82	73.38	58.16	61.41	73.04	61.25	99.12	50.24	198.77	85.41	88.3	7	7	9	9	9	7	7	8	7	7	7	6	7	7
FALSE	High	Master Protein	A0A088A6G8	CYCLIN domain-containing protein OS=Apis mellifera OX=7460 GN=LOC412342 PE=3 SV=1		0.001	FALSE	5.675	8	2	3	2	271	31.2	5.99											2.7							2.34		2.31											1
FALSE	High	Master Protein	A0A343ITF9	Cytochrome b OS=Apis mellifera mellifera OX=44477 PE=3 SV=1		0	FALSE	18.94	15	4	37	1	383	45.2	9.29	6.14	5.51	7.25	4.77	5.72	2.72	8.04	10.63		7.39	5.02	5.68	5.55	2.87	6.12					0	1	1	3	2	3	1	2	3		2	1	1	1	1
FALSE	High	Master Protein	A0A347ZMU3	Cytochrome b OS=Apis mellifera OX=7460 GN=Cytb PE=3 SV=1		0	FALSE	19.676	11	4	47	1	383	45.2	9.29	6.14	8.91	7.25	4.77	5.72	2.72	9.78	12.33		7.39	5.02	5.68	9.55	2.87	6.12						1	2	4	2	4	1	3	4		2	2	1	2	2
FALSE	High	Master Protein	A0A088AV27	Cytochrome b5 heme-binding domain-containing protein OS=Apis mellifera OX=7460 GN=LOC413164 PE=3 SV=1		0	FALSE	60.6	52	10	90	10	198	22.1	5.08	14.01	18.17	15.23	7.11	3.75	15.64	17.26	20.42	13.42	11.22	10.22	21.02	17.91	14.47	15.81	15.94	26.74	24.52	12.42	2.97	3	3	3	1	1	4	4	4	3	2	3	5	4	3
FALSE	High	Master Protein	A0A088A5G3	Cytochrome b5 heme-binding domain-containing protein OS=Apis mellifera OX=7460 GN=LOC413486 PE=3 SV=1		0	FALSE	14.82	45	3	15	3	138	15.8	4.7			3.37			10.54	6.54	3.83	2.14				3.36		6.85		3.22	2.39	2.67	2.75			1			2	1	1	1				1
FALSE	High	Master Protein	A0A087ZUT8	Cytochrome b5 heme-binding domain-containing protein OS=Apis mellifera OX=7460 GN=LOC726860 PE=3 SV=1		0	FALSE	32.088	49	3	110	3	130	14.5	5.29	10.75	43.46	16.81	5.62	9.07	19.31	32.94	22.16	11.05	19.45	32.29	17.95	8.48	16.47	12.29	29.77	12.22	16.98	10.67	2.37	3	3	2	2	2	3	3	2	3	2	3	2	3	2
FALSE	High	Master Protein	A0A088AI76	Cytochrome b561 domain-containing protein OS=Apis mellifera OX=7460 GN=LOC726441 PE=4 SV=1		0	FALSE	7.615	11	1	2	1	235	25.9	8.56																		4.44
FALSE	High	Master Protein	A0A088AFT4	Cytochrome b-c1 complex subunit 6 OS=Apis mellifera OX=7460 GN=LOC726316 PE=3 SV=1		0	FALSE	30.483	44	3	83	3	87	10.2	6.99	0	5.61	0			26.36	20.66	19.72	0	12.24	6.23	5.01	15.95	5.71	3.61	3.65	24.35	0	4.68	15.06	1	2	1			2	3	2	2	2	2	2	2	2
FALSE	High	Master Protein	A0A088ASD9	Cytochrome b-c1 complex subunit 7 OS=Apis mellifera OX=7460 GN=LOC551757 PE=3 SV=1		0	FALSE	121.645	66	11	277	11	110	13.5	5.92	45.08	36.09	44.73	21.43	25.33	55.91	72.34	69.13	48.46	52.65	61.91	58.34	71.13	51.06	49.63	15.89	67.28	17.05	0	5.39	5	6	7	5	5	8	9	11	9	8	6	8	8	7
FALSE	High	Master Protein	A0A088AI48	Cytochrome b-c1 complex subunit Rieske, mitochondrial OS=Apis mellifera OX=7460 PE=4 SV=1		0	FALSE	72.816	59	11	242	11	246	26.7	9.13	48.68	31.84	53.44	29.39	43.65	42.14	29.73	37.39	20.61	33.01	49.26	24.42	54.04	43.31	32.23	19.79	13.88	21.89	12.55	7.29	7	6	7	6	8	7	6	6	6	7	8	5	8	5
FALSE	High	Master Protein	A0A087ZSK5	Cytochrome c heme lyase OS=Apis mellifera OX=7460 GN=LOC408968 PE=3 SV=1		0	FALSE	11.186	13	2	8	2	276	32.2	6.25			0			2.46	2.79	0		2.56			3.14	0		2.28							1			1	1	1		1			1	1
FALSE	High	Master Protein	P00038	Cytochrome c OS=Apis mellifera OX=7460 GN=cytC PE=1 SV=2		0	FALSE	32.049	53	7	52	7	108	11.9	9.47	10.96	4.27	4.46	1.81		22.95	5.22	4.75	5.75		4.69	4.74	2.4	6.38	2.65	2.37	5.25	0	2.01	11.22	2	2	1	1		7	2	2	3		2	2	1	3
FALSE	High	Master Protein	A0A343WSU3	Cytochrome c oxidase subunit 1 (Fragment) OS=Apis mellifera OX=7460 GN=COXI PE=4 SV=1		0	FALSE	17.915	33	1	85	1	81	9.5	7.34	24.59	20.47	10.99	5.94	9.11	7.05	2.85	9.28	0	9.47	10.88	10.93	13.69	13.66	9.13						1	1	1	1	1	1	1	1	1	1	1	1	1	1
FALSE	High	Master Protein	P20375	Cytochrome c oxidase subunit 2 OS=Apis mellifera ligustica OX=7469 GN=COII PE=3 SV=1		0	FALSE	57.7	39	5	150	5	225	26.6	6.37	18.37	24.51	32.03	19.1	23.44	26.83	20.36	31.38	15.11	30.5	26.57	17.48	40.74	32.52	33.03	36.86	0	17.63	16.58	26.99	3	3	4	3	3	2	3	4	2	3	3	3	4	4
FALSE	High	Master Protein	A0A087ZUZ0	Cytochrome c oxidase subunit OS=Apis mellifera OX=7460 GN=Cox6b1 PE=3 SV=1		0	FALSE	27.127	68	5	74	5	92	10.9	7.78	17.32	15.43	13.92	2.21	8.35	14.28	16.63	20.97	15.04	12.21	8.29	10.57	3.42	5.92	16.49		7.9	3.38		3.77	3	2	3	1	2	3	3	3	3	3	2	3	1	2
FALSE	High	Master Protein	Q9NIM0	Cytochrome P450 (Fragment) OS=Trichogramma cacaeciae OX=1667566 GN=CYP4G12 PE=4 SV=1		0.001	FALSE	4.677	20	1	1	1	127	14.5	5.47																		0
FALSE	High	Master Protein	Q309A5	Cytochrome P450 monooxygenase OS=Apis mellifera OX=7460 GN=CYP6AS5 PE=2 SV=1		0	FALSE	188.297	53	26	465	3	499	57.9	8.38	87.48	77.48	133.07	41.5	31.9	132.07	98.09	139.33	49.59	24.8	95.34	83.27	81.83	84.16	42.32	44.85	37.52	34.66	18.53	21.07	16	12	22	9	8	21	18	24	12	7	17	16	17	18
FALSE	High	Master Protein	A0A088AEK4	Cytochrome P450 monooxygenase OS=Apis mellifera OX=7460 PE=4 SV=1		0	FALSE	177.654	51	24	430	2	491	57.1	8.56	77.8	86.05	126.99	41.5	31.9	115.88	90.72	132.24	44.61	21.65	90.83	80.33	75.2	72.08	38.74	32.2	32.87	31.43	19.53	21.07	14	13	19	9	8	19	16	21	10	6	16	15	16	14
FALSE	High	Master Protein	A0A087ZRN0	Cytoplasmic FMR1-interacting protein OS=Apis mellifera OX=7460 GN=Sra-1 PE=3 SV=1		0	FALSE	10.684	5	4	5	4	1292	149.8	6.99						0	3.96	0																		1	3	1
FALSE	High	Master Protein	A0A088ADG9	CYTOSOL_AP domain-containing protein OS=Apis mellifera OX=7460 PE=4 SV=1		0	FALSE	137.95	53	16	138	16	457	49.3	6.98	39.95	6.46	5.33	8.58		65.56	10.55	7.06			70.86	34.35	25.9	59.52	9.88	30.39	13.61	36.8	25.72	26.05	5	2	2	4		9	3	2			11	7	6	11
FALSE	High	Master Protein	A0A088AP39	Cytosolic Fe-S cluster assembly factor NUBP1 homolog OS=Apis mellifera OX=7460 GN=412289 PE=3 SV=1		0	FALSE	10.157	12	2	6	2	324	35.1	5.11						1.86	1.62				4.62	0														1	1				2	1
FALSE	High	Master Protein	A0A088AR65	Cytosolic Fe-S cluster assembly factor NUBP2 homolog OS=Apis mellifera OX=7460 GN=LOC410516 PE=3 SV=1		0	FALSE	16.205	21	3	6	3	260	28	6.13				0		7.56					8.89			2.04										1		2					2			1
FALSE	High	Master Protein	A0A088A1U3	DAGKc domain-containing protein OS=Apis mellifera OX=7460 PE=4 SV=1		0.001	FALSE	4.772	3	1	1	1	404	45.4	8.95											2.4																				1
FALSE	High	Master Protein	A0A087ZYZ6	DAO domain-containing protein OS=Apis mellifera OX=7460 GN=LOC410999 PE=4 SV=1		0	FALSE	5.999	4	2	10	2	454	50.7	9.14						0	2.07				1.99		2.05	1.89		0				0						1	2				2		2	1
FALSE	High	Master Protein	B9UKF1	Defensin OS=Apis cerana cerana OX=94128 GN=Def PE=2 SV=1		0.001	FALSE	5.666	27	2	6	2	95	10.7	7.24					1.99				2.28	4.01			2.21					2.24							1				1	1			1
FALSE	High	Master Protein	A0A088A822	Delta-1-pyrroline-5-carboxylate synthase OS=Apis mellifera OX=7460 GN=LOC412948 PE=3 SV=1		0.003	FALSE	3.471	2	1	1	1	784	85	7.81									2.24																				1
FALSE	High	Master Protein	A0A088ACF3	Delta-aminolevulinic acid dehydratase OS=Apis mellifera OX=7460 GN=Pbgs PE=3 SV=1		0	FALSE	18.56	18	4	5	4	336	37	8.53			2.51					3.09										3.44		5.63			1					1
FALSE	High	Master Protein	A0A088AQM2	Deltameth_res domain-containing protein OS=Apis mellifera OX=7460 GN=LOC551381 PE=4 SV=1		0	FALSE	30.983	38	2	106	2	94	10.5	9.76	20.42	20.77	37.24	20.92	23.36	15.07	11	31.95	2.9	22.55	19.55	17.08	22.45	12.92	19.68	0	14.1	13.72	3.45		2	1	2	2	2	2	1	2	2	2	2	2	2	2
FALSE	High	Master Protein	A0A088A8J8	Deoxyhypusine hydroxylase OS=Apis mellifera OX=7460 GN=LOC410763 PE=3 SV=1		0.002	FALSE	3.659	3	1	7	1	303	34.2	5.11	0					3.25					1.96	1.68		1.62							1					1					1	1		1
FALSE	High	Master Protein	A0A087ZR38	DEP domain-containing protein OS=Apis mellifera OX=7460 GN=Trp1 PE=4 SV=1		0	FALSE	12.048	7	2	7	2	364	42.6	8.56													2.97	6.42	2.26		3.35	3.22	2.09														1	2
FALSE	High	Master Protein	A0A088A2G9	Dephospho-CoA kinase OS=Apis mellifera OX=7460 PE=3 SV=1		0	FALSE	13.358	14	2	14	2	236	27.2	9.26		2.45	2.23			5.29	2.98	4.23			4.49	3.73	2.55	3.24		0						1	1			1	1	1			1	1	1	1
FALSE	High	Master Protein	A0A088A6M4	Derlin OS=Apis mellifera OX=7460 GN=727262 PE=3 SV=1		0	FALSE	15.324	17	4	7	4	250	29.2	8.18	5.78		5.04				3.36						3.1			2.13					2		2				1						1
FALSE	High	Master Protein	A0A088AI75	Diacylglycerol kinase OS=Apis mellifera OX=7460 GN=rdgA PE=3 SV=1		0	FALSE	30.278	6	5	14	5	1358	149.8	7.05				0			5.46	6.48		2.62	4.06		2.17		2		3.88	3.56	2.42	3.93				1			2	2		1	2		1
FALSE	High	Master Protein	A0A088APL2	Dihydrolipoamide acetyltransferase component of pyruvate dehydrogenase complex OS=Apis mellifera OX=7460 GN=LOC551631 PE=3 SV=1		0	FALSE	102.697	34	16	162	16	622	66.9	6.74	38.56	14.78	30.64	2.9	8.61	37.81	18.88	39.41	22.63	19.69	24.48	5.66	44.49	33.31	30.8	15.2	7.87	19.65	24.85	11.44	9	5	9	2	5	9	6	10	8	5	6	2	10	8
FALSE	High	Master Protein	A0A088AII9	Dihydrolipoyl dehydrogenase OS=Apis mellifera OX=7460 GN=LOC551039 PE=3 SV=1		0	FALSE	159.902	49	14	206	14	507	54.5	7.64	28.89	32.07	27.88		3.85	94.52	51.3	40.11	1.82	5.32	58.36	36.21	38.89	53.91	32.5	28.41	8.21	5.22	11.66	7.67	8	6	8		2	12	8	9	2	3	10	8	9	9
FALSE	High	Master Protein	A0A2H4MD19	Dihydropteridine reductase (Fragment) OS=Apis mellifera OX=7460 GN=DHPR PE=2 SV=1		0	FALSE	15.351	22	3	15	1	230	24.9	8.76		0	2.01		0	8.18	3.22	2.42	1.7		2.89	3.59		2.57		0	3.03					1	1		1	2	1	1	1		1	1		1
FALSE	High	Master Protein	A0A093SJ51	Dihydroxy-acid dehydratase OS=Pectobacterium carotovorum subsp. carotovorum OX=555 GN=ilvD PE=3 SV=1		0	FALSE	9.185	4	1	1	1	616	65.7	5.69												4.41																				1
FALSE	High	Master Protein	A0A087ZQA2	Dipeptidase OS=Apis mellifera OX=7460 PE=3 SV=1		0.002	FALSE	4.444	3	1	3	1	418	47	7.24						3.36	0							0												1	1							1
FALSE	High	Master Protein	A0A087ER84	Divalent metal cation transporter MntH OS=Lactobacillus kunkeei OX=148814 GN=mntH PE=3 SV=1		0.002	FALSE	4.286	4	1	1	1	519	56.4	6.89												3.58																				1
FALSE	High	Master Protein	A0A088ARC7	DJ-1_PfpI domain-containing protein OS=Apis mellifera OX=7460 PE=4 SV=1		0	FALSE	10.923	19	3	5	3	186	20.2	6.57				2.17		5.52			2.43											2.53				1		2			1
FALSE	High	Master Protein	A0A093VDC3	DNA protection during starvation protein OS=Pectobacterium carotovorum subsp. carotovorum OX=555 GN=dps PE=3 SV=1		0.001	FALSE	5.503	9	1	12	1	167	18.5	6.09		4.38					6.61					15.84										1					1					1
FALSE	High	Master Protein	A0A088AGM4	DNA topoisomerase 2 OS=Apis mellifera OX=7460 PE=3 SV=1		0	FALSE	12.88	3	3	4	3	1440	164.3	8.78							2.58	4.36		2.02																	1	2		1
FALSE	High	Master Protein	A0A088AAI8	DNA-(apurinic or apyrimidinic site) lyase OS=Apis mellifera OX=7460 GN=Rrp1 PE=3 SV=1		0.001	FALSE	5.118	5	1	2	1	336	38.7	9.09						2.35					1.86															1					1
FALSE	High	Master Protein	A0A087EQX4	DNA-binding protein OS=Lactobacillus kunkeei OX=148814 GN=FF306_00035 PE=3 SV=1		0	FALSE	25.14	49	3	9	3	91	9.5	9.99												33.72																				3
FALSE	High	Master Protein	A0A087EPI8	DNA-directed RNA polymerase subunit beta' OS=Lactobacillus kunkeei OX=148814 GN=rpoC PE=3 SV=1		0	FALSE	6.945	2	2	2	1	1220	136	6.48												5.68																				2
FALSE	High	Master Protein	C5CC71	DNA-directed RNA polymerase subunit beta OS=Micrococcus luteus (strain ATCC 4698 / DSM 20030 / JCM 1464 / NBRC 3333 / NCIMB 9278 / NCTC 2665 / VKM Ac-2230) OX=465515 GN=rpoB PE=3 SV=1		0.001	FALSE	5.796	1	1	2	1	1168	128.5	4.89												5.21																				1
FALSE	High	Master Protein	A0A1Q4NUD5	DNA-directed RNA polymerase subunit beta' OS=Serratia marcescens OX=615 GN=rpoC PE=3 SV=1		0.001	FALSE	5.446	1	2	2	1	1407	154.8	6.52												5.43																				2
FALSE	High	Master Protein	A0A087ZYS0	Dolichol-phosphate mannosyltransferase subunit 1 OS=Apis mellifera OX=7460 GN=LOC409115 PE=3 SV=1		0	FALSE	11.605	13	2	5	2	253	29	8.4		2.45				3.4	4.01				4.27							2.46				1				1	1				1
FALSE	High	Master Protein	A0A087ZSQ6	Dolichyl-diphosphooligosaccharide--protein glycosyltransferase 48 kDa subunit OS=Apis mellifera OX=7460 GN=LOC552051 PE=3 SV=1		0	FALSE	58.825	29	7	72	7	434	48.4	5.55	23.35	19.16	20		6.32	13.91	22.98	24.64		9.09	10	20.11	17.31	7.51	9.45		9.93	6.59	7.68		4	3	5		2	3	5	6		3	3	5	4	2
FALSE	High	Master Protein	A0A087ZUX6	Dolichyl-diphosphooligosaccharide--protein glycosyltransferase subunit 1 OS=Apis mellifera OX=7460 PE=3 SV=1		0	FALSE	93.16	38	16	162	16	566	65.5	7.34	18.96	22.46	36.49	5.76	8.29	24.78	29.37	33.71	4.41	12.06	35.01	25.58	31.23	27	25.18	19.05	19.82	25.11	12.14	2.63	7	7	11	3	4	7	10	8	3	4	11	8	10	8
FALSE	High	Master Protein	A0A088A702	Dolichyl-diphosphooligosaccharide--protein glycosyltransferase subunit 2 OS=Apis mellifera OX=7460 PE=3 SV=1		0	FALSE	33.111	12	7	23	7	651	73.3	8.92	3.85	4.04	6.76			3.6	12.82	4.03		3.92	5.98	2.57	1.97		1.78	2.63		3.92			1	1	2			3	3	1		1	2	1	1
FALSE	High	Master Protein	Q86DH6	Dorsal protein splice variant B OS=Apis mellifera OX=7460 GN=Dl PE=2 SV=1		0	FALSE	15.75	6	3	6	3	810	92.2	6.14	3.54					1.65					5.59			3.63		1.72					1					1					2			1
FALSE	High	Master Protein	A0A088A6Q4	DUF1279 domain-containing protein OS=Apis mellifera OX=7460 GN=LOC725167 PE=4 SV=1		0	FALSE	10.667	7	2	21	2	353	39.7	9.58	5.59	7.64	2.73		2.51	2.4	8.95	4.63		2.47	5.25		4.93	2.93	4.23						1	2	1		1	1	2	1		1	2		2	1
FALSE	High	Master Protein	A0A088A7I9	DUF1681 domain-containing protein OS=Apis mellifera OX=7460 GN=LOC409531 PE=4 SV=1		0	FALSE	6.228	8	1	1	1	243	27.3	8.51																				4.19
FALSE	High	Master Protein	A0A088AMG1	DUF1713 domain-containing protein OS=Apis mellifera OX=7460 GN=107965473 PE=4 SV=1		0.001	FALSE	4.812	9	2	3	2	233	27.6	10.13								2.21			0				0													1			1
FALSE	High	Master Protein	A0A088A055	DUF1907 domain-containing protein OS=Apis mellifera OX=7460 GN=LOC411385 PE=4 SV=1		0	FALSE	8.245	10	2	2	2	319	35.4	6.57						5.76																				2
FALSE	High	Master Protein	A0A088ATH0	DUF2236 domain-containing protein OS=Apis mellifera OX=7460 GN=LOC408641 PE=4 SV=1		0	FALSE	13.959	11	3	13	3	339	40.1	9.2		2.74					4.12				4.73	4				1.9		5.11		2.55		1					3				2	3
FALSE	High	Master Protein	A0A088AA70	DUF3421 domain-containing protein OS=Apis mellifera OX=7460 PE=4 SV=1		0	FALSE	22.786	38	4	5	4	125	13.9	8.18															13.91
FALSE	High	Master Protein	A0A088ABN7	DUF862 domain-containing protein OS=Apis mellifera OX=7460 GN=LOC409784 PE=4 SV=1		0	FALSE	47.93	25	10	25	10	558	63.5	5.29	2.39	2.82				12.22	0				7.71			5.03		10.01	6.72	5.64		1.81	1	1				4	1				3			3
FALSE	High	Master Protein	A0A088A6F7	DUF953 domain-containing protein OS=Apis mellifera OX=7460 GN=cl PE=4 SV=1		0.004	FALSE	3.287	10	1	3	1	126	14.6	5.55	0					1.77					1.68										1					1					1
FALSE	High	Master Protein	A0A088A1V1	Dynamin-type G domain-containing protein OS=Apis mellifera OX=7460 GN=410263 PE=3 SV=1		0	FALSE	36.726	14	9	21	9	766	87.7	7.03	2.77		6.02			5.28	2.66	8.24			5.43		4.69	3.64			3.3		2.06	2.96	1		3			3	1	4			2		2	1
FALSE	High	Master Protein	A0A088AMM2	Dynamin-type G domain-containing protein OS=Apis mellifera OX=7460 GN=opa1-like PE=3 SV=1		0	FALSE	41.293	13	8	21	8	976	113.6	8.47	7.03		3.86			5.71	0	2.63	2.11	3.64	4.13	6.68	3.41	3.34	0	1.89	4.56	5.47		1.67	2		2			2	1	1	1	1	1	2	1	1
FALSE	High	Master Protein	A0A087ZRS3	Dynamin-type G domain-containing protein OS=Apis mellifera OX=7460 PE=3 SV=1		0	FALSE	409.018	63	38	762	38	868	97.9	4.44	262.38	133.13	153	43.39	33.06	226.06	150.21	130.01	59.55	48.07	154.15	120.92	97.88	167.14	76.48	153.39	93.74	77.21	21.51	76.95	31	20	22	13	11	29	23	21	15	13	24	20	17	27
FALSE	High	Master Protein	A0A087ZYC6	Dynein light chain OS=Apis mellifera OX=7460 GN=DLC-D PE=3 SV=1		0	FALSE	11.607	33	2	35	2	89	10.4	7.37	4.56	5.51	0	2.64		10.39	10.24	3.89	4.46		10.83	7.72	0	1.74		3.05	5.74	4.13	3.78	3.5	2	2	1	2		2	2	2	1		2	2	1	1
FALSE	High	Master Protein	A0A088A8B6	Dynein light intermediate chain OS=Apis mellifera OX=7460 GN=Dlic PE=3 SV=1		0	FALSE	23.207	12	4	15	4	480	53.4	5.81	4.16					4.69	9.33	3.92		3.13	8.3	4.18		4.96		4.36		2.4		2.17	1					1	2	1		1	2	1		1
FALSE	High	Master Protein	A0A088AKW6	DZF domain-containing protein OS=Apis mellifera OX=7460 GN=Zn72D PE=4 SV=1		0	FALSE	54.736	15	10	43	10	997	108.1	9.04	3.5	7.45			2.58	7.9	5.83	1.69		0	23.64	2.39	2.39	9.49	1.9	5.56	2.78	5.02	2.01		1	2			1	3	1	1		1	6	1	1	3
FALSE	High	Master Protein	A0A088ADR7	E2_bind domain-containing protein OS=Apis mellifera OX=7460 GN=LOC409394 PE=4 SV=1		0.004	FALSE	3.278	3	1	1	1	439	49.4	6.3						2.8																				1
FALSE	High	Master Protein	A0A087ZU00	EB domain-containing protein OS=Apis mellifera OX=7460 GN=102654257 PE=4 SV=1		0.001	FALSE	5.587	11	1	1	1	170	18.7	8.1																		0
FALSE	High	Master Protein	A0A088AUN3	EF-hand domain-containing protein OS=Apis mellifera OX=7460 GN=LOC552747 PE=4 SV=1		0	FALSE	16.279	11	3	7	3	526	59.8	4.5						2.78					2.66			2.85			5.09			4.31						1					1			1
FALSE	High	Master Protein	A0A088AAX0	EF-hand domain-containing protein OS=Apis mellifera OX=7460 GN=Manf PE=4 SV=1		0	FALSE	8.516	15	3	4	3	175	20.1	7.52																	1.98			6.39
FALSE	High	Master Protein	A0A087ZRZ9	EF-hand domain-containing protein OS=Apis mellifera OX=7460 PE=4 SV=1		0.002	FALSE	4.232	13	2	5	2	126	15	9.33								1.87			0			1.85			1.63			2.2								1			1			1
FALSE	High	Master Protein	A0A088AA85	eIF2B_5 domain-containing protein OS=Apis mellifera OX=7460 PE=4 SV=1		0	FALSE	21.367	18	6	17	6	335	38.3	7.64	2.29		2.1			2.92	0	2.65			5.57	1.88	2.49	3.1	2.05	2.51	0	4.9			1		1			1	1	2			2	1	1	1
FALSE	High	Master Protein	A0A0B4J2M5	Electron transfer flavoprotein-ubiquinone oxidoreductase OS=Apis mellifera OX=7460 GN=Etfdh PE=4 SV=1		0	FALSE	32.336	18	7	25	7	606	67	7.53	2.76		2.45			11.29	3.11	8.81			9.34	3.44		0	5.3	2.88	6.13	0	2.43	2.61	2		2			2	1	2			3	1		1
FALSE	High	Master Protein	A0A087ZS68	ELFV_dehydrog domain-containing protein OS=Apis mellifera OX=7460 GN=Gdh PE=3 SV=1		0	FALSE	267.384	67	31	588	31	553	61.6	8.09	115.33	83.69	96.48	1.79	3.6	157.18	104.97	68.27	9.84	9.11	97.45	104	74.58	97.8	83.73	68.85	35.29	80.03	61.74	224.05	22	20	21	2	3	25	21	18	6	4	22	22	17	21
FALSE	High	Master Protein	A0A087ZRE3	Elongation factor 1-alpha OS=Apis mellifera OX=7460 GN=EF1a-F2 PE=3 SV=1		0	FALSE	261.465	52	19	840	8	461	50.3	9.03	179.46	124.46	140.97	102.67	94.14	204.08	134.59	116.96	75.33	70	224.22	147.64	109.22	178.7	84.65	544.72	84.99	195.04	80.35	50.17	15	13	14	13	14	14	14	13	11	11	15	15	14	16
FALSE	High	Master Protein	P19039	Elongation factor 1-alpha OS=Apis mellifera OX=7460 PE=3 SV=1		0	FALSE	189.903	57	18	584	7	461	50.5	9.09	132.87	88.02	93.65	85.23	58.64	165.12	95.68	87	54.51	31.52	171.54	109.89	83.77	124.42	67.11	119.9	50.87	67.76	26.58	27.9	13	11	13	12	11	14	13	11	10	8	14	13	13	14
FALSE	High	Master Protein	A0A1B4XKR1	Elongation factor G OS=Enterococcus faecalis OX=1351 GN=fusA PE=3 SV=1		0.003	FALSE	3.504	1	1	5	1	693	76.6	4.89												1.79								3.74												1
FALSE	High	Master Protein	A0A087EPJ2	Elongation factor G OS=Lactobacillus kunkeei OX=148814 GN=fusA PE=3 SV=1		0.002	FALSE	3.688	2	1	1	1	696	76.7	5												3.1																				1
FALSE	High	Master Protein	A0A088A1L8	Elongation factor Ts, mitochondrial OS=Apis mellifera OX=7460 GN=LOC408352 PE=3 SV=1		0	FALSE	19.488	24	6	14	6	302	34	6.71	4.76		2			5.36					6.99			5.16	2	3.56					3		1			2					2			2
FALSE	High	Master Protein	A0A087ZW54	Elongation factor Tu OS=Apis mellifera OX=7460 GN=LOC408328 PE=3 SV=1		0	FALSE	314.317	76	28	887	26	469	52.4	7.96	149.77	154.43	137.17	113.4	88.31	173.75	151.04	153.1	66.07	88.67	163.19	137.07	181.09	137.1	111.77	103.63	36.93	81.75	62.45	99.86	19	21	20	19	16	24	20	21	15	20	19	19	23	21
FALSE	High	Master Protein	A0A1B4XKS5	Elongation factor Tu OS=Enterococcus faecalis OX=1351 GN=tuf PE=3 SV=1		0	FALSE	64.916	17	5	65	4	395	43.4	4.83		43.15	2.46				13.61	7.58			6.04	121.88	9.21		2.7	5.56				8.64		3	1				2	2			2	5	3
FALSE	High	Master Protein	A0A087EP72	Elongation factor Tu OS=Lactobacillus kunkeei OX=148814 GN=tuf PE=3 SV=1		0	FALSE	118.564	61	16	95	15	395	43.4	4.94	5.03	14.43	6.19	4.1	2.11	4.86	14.41	6.5	3.9	2.02	6.37	111.99	6.3	2.24	2.12	4.54	6.21	10.74	1.93	9.56	1	2	1	1	1	1	2	1	1	1	1	16	2	1
FALSE	High	Master Protein	V5T6M5	Elongation factor Tu OS=Lactobacillus mellis OX=1218508 GN=tuf PE=3 SV=1		0	FALSE	47.354	12	4	84	1	417	46.2	4.97	5.03	21.85	8.19	4.1	2.11	6.93	25.06	6.5	3.9	2.02	13.42	62.2	8.47	2.24	2.12	4.54	6.21	8.78	1.93	4.33	1	2	2	1	1	2	2	1	1	1	2	3	3	1
FALSE	High	Master Protein	C5CC66	Elongation factor Tu OS=Micrococcus luteus (strain ATCC 4698 / DSM 20030 / JCM 1464 / NBRC 3333 / NCIMB 9278 / NCTC 2665 / VKM Ac-2230) OX=465515 GN=tuf PE=3 SV=1		0	FALSE	29.406	7	2	24	1	396	43.8	5.07		11.33					15.98				7.05	33.7	2.48									1					1				1	2	1
FALSE	High	Master Protein	A0A0J5CD52	Elongation factor Tu OS=Serratia marcescens OX=615 GN=tuf PE=3 SV=1		0	FALSE	31.604	9	2	26	1	394	43.2	5.31		33.65				3.79		3.93	2.09			37.19	3.35		0	3.11				8.64		1				1		1	1			1	1
FALSE	High	Master Protein	V5RJB0	Elongation factor Tu OS=Spiroplasma apis B31 OX=1276258 GN=tufA PE=3 SV=1		0	FALSE	45.173	9	3	119	1	395	43	5.31	10.8	54.27	14.56	4.1	2.11	4.86	26.11	18.98	3.9	2.02	15.79	97.27	16.91	4.57	6.5	7.65	6.21	8.78	1.93	15.81	2	3	2	1	1	1	2	3	1	1	2	3	3	2
FALSE	High	Master Protein	A0A088AIA2	Elongation of very long chain fatty acids protein OS=Apis mellifera OX=7460 GN=LOC413789 PE=3 SV=1		0	FALSE	12.66	4	1	21	1	331	38.9	9.11	3.64	6.96	9.16			3.56	0	3.45			6.58	2.79	6.78	6.79	2.08	1.76	3.69	6.54			1	1	1			1	1	1			1	1	1	1
FALSE	High	Master Protein	A0A088AIA4	Elongation of very long chain fatty acids protein OS=Apis mellifera OX=7460 PE=3 SV=1		0.001	FALSE	4.697	14	2	3	2	139	16.4	7.4		2.36						1.64					0									1						1					1
FALSE	High	Master Protein	A0A088AG65	EMC1_C domain-containing protein OS=Apis mellifera OX=7460 PE=4 SV=1		0	FALSE	23.661	10	7	15	7	947	106.2	8.44		4.62	2.36			0	4.12	4.53			1.93		2.96	2.4	1.68		2.23	2				2	1			1	2	3			1		1	1
FALSE	High	Master Protein	A0A087ZQ02	Endoglucanase OS=Apis mellifera OX=7460 GN=LOC413346 PE=3 SV=1		0	FALSE	6.821	5	1	2	1	485	54.3	5.69						4.28					4.34															1					1
FALSE	High	Master Protein	A0A088AST9	Enolase OS=Apis mellifera OX=7460 PE=4 SV=1		0	FALSE	186.816	61	16	378	16	366	39.8	7.05	105.28	58.52	13.11	28.32	6.8	153.15	34.74	28.16	29.59	2.98	125.98	62.36	26.5	108.51	9.36	105.4	103.4	70.19	82.12	13.35	13	10	5	10	3	14	8	8	9	1	14	13	6	13
FALSE	High	Master Protein	A0A1B4XPT3	Enolase OS=Enterococcus faecalis OX=1351 GN=eno PE=3 SV=1		0	FALSE	15.047	5	2	33	2	432	46.5	4.68		1.62				1.76	3.19				1.9	82.7					3.56		3.57			1				1	1				1	1
FALSE	High	Master Protein	A0A087ENY7	Enolase OS=Lactobacillus kunkeei OX=148814 GN=eno PE=3 SV=1		0	FALSE	40.09	23	7	9	7	439	47.7	4.84												26.76																				7
FALSE	High	Master Protein	A0A088AL38	Enolase-phosphatase E1 OS=Apis mellifera OX=7460 PE=3 SV=1		0.001	FALSE	4.92	3	2	2	2	743	82.4	4.64						0														0						1
FALSE	High	Master Protein	A0A087ZYC9	ENTH domain-containing protein OS=Apis mellifera OX=7460 GN=lap PE=4 SV=1		0	FALSE	10.094	2	1	4	1	890	93.6	7.91	2.37					3.89	4.01							3.69							1					1	1							1
FALSE	High	Master Protein	A0A088AQL3	ENTH domain-containing protein OS=Apis mellifera OX=7460 GN=lqfR PE=4 SV=1		0	FALSE	15.538	3	3	7	3	1443	165.4	5.53	4.41					2.63			0		2.76						3.04	3.19			2					1			1		1
FALSE	High	Master Protein	A0A088ATX9	ENTH domain-containing protein OS=Apis mellifera OX=7460 PE=4 SV=1		0.002	FALSE	3.934	2	1	6	1	569	62.4	5.52		0					1.7				3.92		1.66	1.97								1					1				1		1	1
FALSE	High	Master Protein	A0A088AKI9	Epimerase domain-containing protein OS=Apis mellifera OX=7460 GN=Gmer PE=3 SV=1		0	FALSE	12.455	11	3	10	3	322	36.8	7.05						5.9					6.24	5.68		3.05		6.02										3					2	2		1
FALSE	High	Master Protein	A0A088ANF9	Epimerase domain-containing protein OS=Apis mellifera OX=7460 GN=LOC412149 PE=4 SV=1		0.001	FALSE	5.557	4	1	1	1	372	41.6	6.15											2.03																				1
FALSE	High	Master Protein	A0A087ZQU6	Epimerase domain-containing protein OS=Apis mellifera OX=7460 PE=4 SV=1		0	FALSE	108.425	45	16	163	16	398	45.9	8.85	32.72	32.64	22.54	7.46	10.03	49.8	37.24	42.62	4.55	31.85	27.39	12.17	31.96	17.35	18.15	16.26	8.05	7.91	4.92	10.88	7	6	5	2	4	10	7	9	5	5	7	3	6	5
FALSE	High	Master Protein	A0A087ZVE8	Epoxide hydrolase OS=Apis mellifera OX=7460 GN=LOC406152 PE=3 SV=1		0	FALSE	168.408	45	17	534	17	456	52	8.35	82.77	85.19	64.1	25.94	39.32	93.67	105.69	133.5	13.96	31.12	131.23	68.53	76.51	99.62	62.96	83.3	54.78	64.43	58.84	29.83	10	9	10	8	8	10	11	13	5	7	12	8	10	10
FALSE	High	Master Protein	A0A088A8C3	ER membrane protein complex subunit 4 OS=Apis mellifera OX=7460 GN=LOC412349 PE=3 SV=1		0	FALSE	14.434	14	1	6	1	175	19.5	9.44	5.24		5.16					5.09		4.5		5.52	5								1		1					1		1		1	1
FALSE	High	Master Protein	A0A088A7F1	ETF domain-containing protein OS=Apis mellifera OX=7460 GN=LOC410308 PE=4 SV=1		0	FALSE	92.216	67	15	127	15	253	27.6	6.93	29.87	7.68	17.26	1.78		42.39	15.15	3.97	5.28	0	34.52	19.26	3.78	21.59	6.73	29.36	16.31	23.36	36.03	26.72	9	4	5	1		10	7	1	3	1	8	5	2	5
FALSE	High	Master Protein	A0A088A872	ETF domain-containing protein OS=Apis mellifera OX=7460 GN=LOC551710 PE=4 SV=1		0	FALSE	115.145	62	16	133	16	333	35.4	8.32	35.69	16.48	20.47	2.11		41.49	21.88	18.91	2.37		38.59	31.7	23.53	40.59	5.52	30.38	24.03	17.95	19.37	14.39	5	5	6	2		8	4	4	1		8	6	5	8
FALSE	High	Master Protein	A0A088AFA9	ETS domain-containing protein OS=Apis mellifera OX=7460 PE=3 SV=1		0	FALSE	109.415	19	19	74	19	1075	121.7	6.67	15.38	3.28	2.43			46.47	5.51	2.54			46.01	5.44	2.28	17.38		17.3	25.81	13.75	5.02		5	1	1			12	2	1			11	2	1	4
FALSE	High	Master Protein	A0A088A560	Eukaryotic translation initiation factor 3 subunit A OS=Apis mellifera OX=7460 GN=eIF3-S10 PE=3 SV=1		0	FALSE	75.733	21	16	47	16	1098	129.8	8.84	9.43	2.24	2.59			7.07	10.32	0		3.37	25.96	5.51	7.94	12.86		8.37	12.63	11.89			3	1	1			3	3	1		1	10	3	2	4
FALSE	High	Master Protein	A0A088AC80	Eukaryotic translation initiation factor 3 subunit B OS=Apis mellifera OX=7460 GN=eIF3-S9 PE=3 SV=1		0	FALSE	52.382	22	11	69	11	702	81.5	5.55	13.1	7.54	4.59	4.11	4.94	27.96	18.61	13.08	2.07	12.29	26.14	5.3	8.13	11.65	4.91	1.8	9.57	1.79	0		4	2	2	2	2	6	5	3	2	3	7	2	2	3
FALSE	High	Master Protein	A0A087ZST3	Eukaryotic translation initiation factor 3 subunit C OS=Apis mellifera OX=7460 GN=eIF3-S8 PE=3 SV=1		0	FALSE	60.102	15	11	36	11	892	104.3	5.83	0	3.47				18.04	11.69	1.97		4.4	13.08	5.71	7.55	6.58	0	1.77	13	6.41		5.38	1	1				5	3	1		1	3	2	2	2
FALSE	High	Master Protein	A0A088AEQ4	Eukaryotic translation initiation factor 3 subunit D OS=Apis mellifera OX=7460 GN=eIF-3p66 PE=3 SV=1		0	FALSE	19.046	12	4	16	4	562	64.6	5.86	3.03	2.27			2.58	3.83	2.77				8.22			3.87		5.61	2.97	2.37	7.62	3.59	1	1			1	1	1				2			1
FALSE	High	Master Protein	A0A088AQJ3	Eukaryotic translation initiation factor 3 subunit E OS=Apis mellifera OX=7460 GN=LOC551242 PE=3 SV=1		0	FALSE	24.979	15	5	15	5	440	51.6	6.07	5.08	5.88	0		0	2.68	10.98				2.77						7.46	2.52			1	2	1		1	1	3				1
FALSE	High	Master Protein	A0A088A223	Eukaryotic translation initiation factor 3 subunit F OS=Apis mellifera OX=7460 GN=LOC413145 PE=3 SV=1		0	FALSE	40.454	36	7	33	7	285	31.4	5.74	13.19	3.47	0			12.71	9.5	2.59		2.19	8.76	3.73	3.35	11.96		3.02	10.94	5.75	2.9		4	1	1			4	3	1		1	3	1	2	4
FALSE	High	Master Protein	A0A088AKE0	Eukaryotic translation initiation factor 3 subunit G OS=Apis mellifera OX=7460 GN=LOC408386 PE=3 SV=1		0	FALSE	13.274	22	3	6	3	285	31.8	8.06						3.83	3.69				3.22	3.44				0										1	1				1	1
FALSE	High	Master Protein	A0A088A4N3	Eukaryotic translation initiation factor 3 subunit H OS=Apis mellifera OX=7460 PE=3 SV=1		0	FALSE	19.843	15	3	9	3	313	36.2	5.87						0	5.75				6					0	6.07									1	2				2
FALSE	High	Master Protein	A0A088A549	Eukaryotic translation initiation factor 3 subunit I OS=Apis mellifera OX=7460 GN=Trip1 PE=3 SV=1		0	FALSE	18.582	11	3	26	3	326	36.6	6.8	2.39	1.96		0		10.79	5.18	2.68		1.85	11.4	5.2	2.24	2.49	0		0	3.63			1	1		1		2	3	2		1	3	2	2	1
FALSE	High	Master Protein	A0A088A861	Eukaryotic translation initiation factor 3 subunit J OS=Apis mellifera OX=7460 GN=Adam PE=3 SV=1		0.004	FALSE	3.265	4	1	2	1	236	27.4	4.96									0								0												1
FALSE	High	Master Protein	A0A088ATI4	Eukaryotic translation initiation factor 3 subunit K OS=Apis mellifera OX=7460 GN=LOC551960 PE=3 SV=1		0	FALSE	16.077	18	3	26	3	216	24.8	5.82		2.29	0			6.35	6.11	1.67		0	9.79	0	0	3.81				2.43				1	1			2	2	1		1	2	1	1	2
FALSE	High	Master Protein	A0A088AQX2	Eukaryotic translation initiation factor 3 subunit L OS=Apis mellifera OX=7460 GN=LOC552056 PE=3 SV=1		0	FALSE	24.132	16	7	22	7	538	63.4	6.33		6.19				0	0	1.95		2.34	7.5		0	4.14	0		0		0	4.89		3				1	2	1		1	4		1	3
FALSE	High	Master Protein	A0A088A9L4	Eukaryotic translation initiation factor 3 subunit M OS=Apis mellifera OX=7460 GN=Tango7 PE=3 SV=1		0	FALSE	31.312	17	5	27	5	391	44.4	5.59	6.79	7.94	3.16			7.5	6.07	6.27		7.48	8.5	10.93	4.4	4.53		4.98		4.33	2.51		1	1	1			1	1	1		1	2	2	1	1
FALSE	High	Master Protein	A0A088ALS2	Eukaryotic translation initiation factor 5A OS=Apis mellifera OX=7460 GN=LOC552572 PE=3 SV=1		0	FALSE	31.219	35	4	28	4	160	17.6	5.4	9.8	2.95	3.18			19.98	3.44	3.54	2.95		11.74	3.5		3.07	2.79	5.97	2.48	3.88	1.98	5.96	2	1	1			4	1	1	1		2	1		1
FALSE	High	Master Protein	A0A088A9Y1	FA_desaturase domain-containing protein OS=Apis mellifera OX=7460 GN=LOC412166 PE=3 SV=1		0	FALSE	16.614	19	5	9	5	347	40.2	9.33			0			2.74		2.8				2.65	3.54			1.95		1.99		2.19			1			1		2				1	1
FALSE	High	Master Protein	A0A088ASN0	FAA_hydrolase domain-containing protein OS=Apis mellifera OX=7460 PE=4 SV=1		0	FALSE	56.635	50	9	39	9	249	27.5	5.34	6.13	0	2.29			24.29		3.03	2.62		5		4.87	10.75	5.79	8.87	9.5	5.25	8.78	2.53	2	1	2			5		1	1		2		2	4
FALSE	High	Master Protein	A0A088AE74	FABP domain-containing protein OS=Apis mellifera OX=7460 GN=Fabp PE=3 SV=1		0	FALSE	34.24	44	7	20	1	133	15.2	8.37						5	2.15		1.75		9.08	2.17				6.13	15.15	5.69		8.73						2	1		1		3	1
FALSE	High	Master Protein	A0A088A627	F-actin-capping protein subunit alpha OS=Apis mellifera OX=7460 GN=LOC552486 PE=3 SV=1		0	FALSE	39.083	27	6	32	6	288	32.8	5.55	15.06	11.73		6.25		11.3	21.04		11.15		6.36					1.93	4.27	4.46		7.82	3	2		2		3	5		4		2
FALSE	High	Master Protein	A0A088ALS0	F-actin-capping protein subunit beta OS=Apis mellifera OX=7460 GN=LOC409581 PE=3 SV=1		0	FALSE	38.709	36	7	32	7	273	30.8	5.72	6.87	19.92		5.04		8.44	13.24		1.79	6.23	7.13			4.72	1.76	10.37	2.77	2.27	2.47		2	5		2		2	4		1	2	3			1
FALSE	High	Master Protein	A0A087ZYD0	FAD-binding PCMH-type domain-containing protein OS=Apis mellifera OX=7460 PE=4 SV=1		0	FALSE	51.008	11	11	29	11	1257	140.8	7.3	3.29	4.22				7	5.22	2.25			11.63	3.68	2.77	3.61			12.95			21.23	1	1				1	1	1			2	1	1	1
FALSE	High	Master Protein	A0A088A0W2	FAS1 domain-containing protein OS=Apis mellifera OX=7460 PE=4 SV=1		0	FALSE	5.893	5	1	2	1	290	32.5	7.34													0	3.54																			1	1
FALSE	High	Master Protein	Q76LA4	Fatty acid binding protein OS=Apis mellifera OX=7460 GN=FABP PE=2 SV=1		0	FALSE	32.804	45	7	19	1	132	15	6.74						5	2.15		1.75		5.81	2.17				6.23	15	3.7		11.41						2	1		1		2	1
FALSE	High	Master Protein	D9MWM7	Fatty acyl-CoA reductase OS=Apis mellifera OX=7460 GN=FAR1 PE=2 SV=1		0	FALSE	191.488	65	23	441	23	516	59.1	8.29	65.01	89.97	82.47	18.54	13.61	92.76	72.61	138.04	12.73	34.49	106.87	98.97	68.39	82.17	15.61	22	34.08	47.35	34.53	21.11	12	15	15	8	5	14	15	20	7	8	16	16	14	16
FALSE	High	Master Protein	D9MX52	Fatty acyl-CoA reductase OS=Apis mellifera OX=7460 GN=LOC411983 PE=2 SV=1		0	FALSE	106.921	44	21	173	21	541	62	8.18	3.76	42.31	25.27	4.03	0	28.65	43.17	47.57	0	22.88	49.08	34.61	44.11	24.19	22.66	5.23	8.85	36.46	24.77	16.62	1	11	8	3	1	8	12	11	1	6	13	8	11	7
FALSE	High	Master Protein	A0A088AD05	Fatty acyl-CoA reductase OS=Apis mellifera OX=7460 PE=3 SV=1		0	FALSE	68.391	53	15	97	15	382	44	9.52	7.65	26.26	30.93		1.84	2.52	13.62	12.23		5.82	15.16	12.88	10.46	7.82	6.4	15.77		14.05	2.05	9.05	4	7	9		2	2	6	6		2	6	4	6	5
FALSE	High	Master Protein	A0A088A816	F-box domain-containing protein OS=Apis mellifera OX=7460 GN=LOC413670 PE=4 SV=1		0	FALSE	18.23	14	4	13	4	517	59.1	6.68		0				8.98		0			3.65		3.77					0	2.95	6.08		1				3		1			1		2
FALSE	High	Master Protein	A0A088AHC4	Fe-ADH domain-containing protein OS=Apis mellifera OX=7460 PE=4 SV=1		0	FALSE	16.903	24	3	7	3	149	16.6	9.25											3.39					2.39		5.36		8.18											1
FALSE	High	Master Protein	A0A088AHC5	Fe-ADH domain-containing protein OS=Apis mellifera OX=7460 PE=4 SV=1		0	FALSE	18.294	33	6	8	6	178	19.7	7.61											2.33					2.58	2.51	4.06		5.63											1
FALSE	High	Master Protein	A0A087ZW75	FERM domain-containing protein OS=Apis mellifera OX=7460 PE=4 SV=1		0	FALSE	7.554	2	2	6	2	1366	156.5	8.84							4.76				2.92	2.95	2.86														2				2	1	1
FALSE	High	Master Protein	A0A087ZZ33	FERM domain-containing protein OS=Apis mellifera OX=7460 PE=4 SV=1		0	FALSE	145.115	34	24	232	24	921	104.9	8.28	49.19	31.61	24.21	19.83	18.69	59.09	36.73	45.23	14.01	27.66	68.56	20.76	48.4	43.58	26.9	27.78	29.94	34.04	1.92	23.55	12	8	7	7	6	13	8	11	6	8	14	7	9	11
FALSE	High	Master Protein	A0A088AEI6	FERM domain-containing protein OS=Apis mellifera OX=7460 PE=4 SV=1		0	FALSE	728.845	58	82	1192	82	2042	217.9	5.81	300.14	189.85	103.68	142.12	162.54	324.4	205.52	173.1	128.36	190.61	257.49	199.59	206.07	236.1	95.68	180.11	153.97	170.41	131.13	38.63	54	42	32	49	48	53	47	37	41	38	52	49	49	52
FALSE	High	Master Protein	A0A088A9A9	FERM domain-containing protein OS=Apis mellifera OX=7460 PE=4 SV=1		0	FALSE	192.794	51	31	329	31	632	74.6	6.28	39.8	31.42	19.64	23.41	28.79	73.99	65.7	20.77	53.26	11.1	36.76	28.99	25.6	29.64	24.02	47.61	55.66	26.16	41.58	86.83	9	9	8	9	8	18	17	6	19	4	12	10	9	11
FALSE	High	Master Protein	A0A087ZXU0	Ferritin OS=Apis mellifera OX=7460 GN=Fer2LCH PE=3 SV=1		0	FALSE	6.206	7	1	1	1	217	25.2	6.54											3.1																				1
FALSE	High	Master Protein	A0A087ZU01	Ferrochelatase OS=Apis mellifera OX=7460 GN=ferrochelatase PE=3 SV=1		0	FALSE	69.694	40	12	124	12	397	45.5	8.48	23.12	37.65	24.48	6.91	2.72	18.21	33.47	16.2	0	11.16	24.58	7.72	26.51	19.64	26.76	2.19	9.74	10.11	3.77	6.16	5	6	7	3	3	6	5	5	3	2	4	2	6	4
FALSE	High	Master Protein	A0A088A280	FHA domain-containing protein OS=Apis mellifera OX=7460 GN=LOC413046 PE=4 SV=1		0	FALSE	16.24	6	3	9	3	795	91.4	4.97						4.21	2.31	2.01		2.04		0					2.35			1.9						2	1	1		1		1
FALSE	High	Master Protein	A0A087ZYL7	Fibrillar collagen NC1 domain-containing protein OS=Apis mellifera OX=7460 GN=LOC410038 PE=4 SV=1		0	FALSE	8.223	2	2	15	2	1501	148.2	8.62	2.33		2.32	4.85	2.13	1.94		2.05	2.14	4.12			1.81		0				2.56	4.45	1		1	2	1	1		1	1	1			1
FALSE	High	Master Protein	A0A088AUX9	FIP-RBD domain-containing protein OS=Apis mellifera OX=7460 GN=Rip11 PE=4 SV=1		0.001	FALSE	5.35	3	1	4	1	530	59.7	8.47						2.64				2.38			0	1.62												1				1			1	1
FALSE	High	Master Protein	A0A088AJJ1	Flavodoxin-like domain-containing protein OS=Apis mellifera OX=7460 PE=4 SV=1		0	FALSE	30.386	33	4	16	4	190	21.2	4.78	1.69		1.94			4.01	1.7	7.12			3.07	3.9	1.92				2.54	2.35	5.8	2.47	1		1			1	1	1			1	1	1
FALSE	High	Master Protein	A0A088ASE8	Flavokinase domain-containing protein OS=Apis mellifera OX=7460 GN=LOC552134 PE=4 SV=1		0	FALSE	18.961	35	4	23	4	147	16.9	8.05	5.81			0		11.05	5.84	6.19			6.61	6.76		3.64	2.5	1.71	5.45	8.58		6.34	2			1		4	2	2			2	2		1
FALSE	High	Master Protein	A0A087ZPQ8	Fructose-bisphosphate aldolase OS=Apis mellifera OX=7460 PE=3 SV=1		0	FALSE	259.411	79	26	645	26	387	41.7	8.12	121.85	74.08	52.98	76.81	75.13	231.44	64.87	88.17	142.19	22.36	136.87	105.75	87.82	149.83	62.42	127.53	75.37	49.02	245.07	44.01	14	12	11	12	13	23	12	13	18	5	17	14	14	18
FALSE	High	Master Protein	A0A088ADU2	Fucosidase_C domain-containing protein OS=Apis mellifera OX=7460 GN=Fuca PE=3 SV=1		0	FALSE	12.417	7	3	6	3	471	55.7	6.47						2.37					2.42						4.49			5.06						1					1
FALSE	High	Master Protein	A0A087ZN22	Fumarylacetoacetase OS=Apis mellifera OX=7460 PE=3 SV=1		0	FALSE	6.342	6	1	1	1	374	41.6	6.19																	3.62
FALSE	High	Master Protein	A0A088A8E6	G protein gamma domain-containing protein OS=Apis mellifera OX=7460 PE=4 SV=1		0.002	FALSE	3.967	0	1	31	1	2056	238.8	8.15	3.93	5.12	3.32	1.66		2.23	5.35	1.87		1.77		0	1.77	1.9	0	1.57	1.72	0	0		1	1	1	1		1	1	1		1		1	1	1
FALSE	High	Master Protein	A0A088A7S9	Gal_mutarotas_2 domain-containing protein OS=Apis mellifera OX=7460 GN=LOC551205 PE=3 SV=1		0	FALSE	10.365	3	2	6	2	925	106.8	6.27	2.5					5.19	0										2.58				1					2	1
FALSE	High	Master Protein	A0A087ZZX4	Galectin OS=Apis mellifera OX=7460 GN=galectin1 PE=4 SV=1		0	FALSE	38.883	18	6	65	6	482	49.8	5.2	13.55	13.68	0	1.73	5.19	22.61	12.85	10.56	9.1		20.93	7.02	5.01	5.79	4.81	26.98		3.16	1.89	14.9	2	3	1	2	2	5	2	4	3		6	2	1	1
FALSE	High	Master Protein	A0A087ZZN6	GB1/RHD3-type G domain-containing protein OS=Apis mellifera OX=7460 GN=atl PE=4 SV=1		0	FALSE	133.52	45	20	209	20	633	72.3	8.6	39.71	20.14	24.99	1.81	1.77	52.96	57.99	56.78	0	21.67	41.82	28.93	39.19	35.32	21.75	24.19	21.93	27.83	21.04	2.74	9	6	9	4	2	12	13	12	2	4	7	6	7	7
FALSE	High	Master Protein	A0A087ZN67	GB12811-like protein OS=Apis mellifera OX=7460 GN=LOC409962 PE=4 SV=1		0	FALSE	21.372	53	3	494	3	177	17.4	5.78	41.21	35.22	21.15	79.63	97.37	9.59	20.23	21.12	9.68	32.25	22.88	22.83	71.89	39.58	36.98	37.59	18.7	206.49	121.47	179.2	1	1	1	2	1	1	1	1	1	1	1	1	2	1
FALSE	High	Master Protein	H9K9P8	GFO_IDH_MocA domain-containing protein OS=Apis mellifera OX=7460 GN=LOC412231 PE=4 SV=1		0	FALSE	50.76	35	8	38	8	331	36.9	6.52						42.5					26.07	9.91	0	17.97	0	2.61		0	5.4							6					4	3	1	4
FALSE	High	Master Protein	A0A088AA33	GGACT domain-containing protein OS=Apis mellifera OX=7460 PE=4 SV=1		0	FALSE	32.045	43	6	37	6	172	20.1	6.39	10.96		0	0		15.39	2.24		1.74		10.47	0		7.58	0	1.97		2			3		1	1		5	1		2		3	1		3
FALSE	High	Master Protein	A0A088A2A8	Gln-synt_C domain-containing protein OS=Apis mellifera OX=7460 GN=GlnS PE=3 SV=1		0	FALSE	168.936	55	16	235	16	405	45.3	8.09	49.96	7.55	7.11	3.58	5.98	83.87	21.6	13.08	6.35	9.71	105.26	44.63	15.65	58.52	8.04	94.03	53.05	33.92	41.8	27.54	8	2	2	1	3	13	7	3	3	3	14	10	5	11
FALSE	High	Master Protein	Q14SN0	Globin 1 OS=Apis mellifera OX=7460 GN=glob1 PE=2 SV=1		0	FALSE	19.126	27	3	8	3	171	19.5	8.59	3.56	3.67		6.5					9.55										4.22		1	1		1					2
FALSE	High	Master Protein	A0A087ZRW7	GLOBIN domain-containing protein OS=Apis mellifera OX=7460 PE=3 SV=1		0	FALSE	10.635	12	2	21	2	216	24.8	5.55	2.36	2.4	2.22	0		8.1	2.4	3.48		3.64	4.88	4.22	5.11	2.89			0				1	1	1	1		2	1	1		1	1	1	1	1
FALSE	High	Master Protein	A0A087ZZS2	Glucosamine 6-phosphate N-acetyltransferase OS=Apis mellifera OX=7460 GN=LOC411757 PE=3 SV=1		0.001	FALSE	4.668	11	1	1	1	189	22	7.49						2.41																				1
FALSE	High	Master Protein	A0A0B4J2M6	Glucose-6-phosphate 1-dehydrogenase OS=Apis mellifera OX=7460 GN=LOC725325 PE=3 SV=1		0	FALSE	105.145	54	22	81	22	518	60.2	6.81	1.62					29	3	1.73	2.32	3.51	52.57	2.77	7.91	17.01	5.72	13.66	2.61	10.91	20.41	25.74	1					9	2	1	1	1	14	1	3	4
FALSE	High	Master Protein	A0A087ZS11	Glucose-6-phosphate 1-epimerase OS=Apis mellifera OX=7460 GN=LOC727456 PE=3 SV=1		0	FALSE	9.422	15	2	4	2	278	31.9	7.5			0			5.31					2.19												1			2					1
FALSE	High	Master Protein	A0A087ZPV4	Glucose-6-phosphate isomerase OS=Apis mellifera OX=7460 GN=LOC551154 PE=3 SV=1		0	FALSE	27.988	16	6	17	6	557	62.9	7.91				0	1.96	10.96			2.24		2.38	4.6		4.51			10			5.16				1	1	4			1		1	1		1
FALSE	High	Master Protein	A0A088APM4	Glucosylceramidase OS=Apis mellifera OX=7460 GN=LOC409708 PE=3 SV=1		0	FALSE	12.407	6	4	5	4	522	59.3	5.57											0	1.93								7.71											1	1
FALSE	High	Master Protein	A0A088A6Y8	Glutamine amidotransferase type-2 domain-containing protein OS=Apis mellifera OX=7460 PE=4 SV=1		0	FALSE	140.452	22	27	83	27	1909	211.9	7.34	3.99	8.21				57.5	6.66	3.45			38.31	11.25	0	32.77		14.81	10.17	10.26	0	3.73	4	3				16	3	2			13	3	1	8
FALSE	High	Master Protein	A0A087EQ00	Glutamine synthetase OS=Lactobacillus kunkeei OX=148814 GN=glnA PE=3 SV=1		0	FALSE	9.887	12	3	4	3	447	50.5	5.05												2.8																				3
FALSE	High	Master Protein	A0A087ZS80	Glutaredoxin domain-containing protein OS=Apis mellifera OX=7460 GN=Grx1 PE=4 SV=1		0	FALSE	7.044	27	2	3	2	98	10.9	6.52			2.48						1.79							0							1						1
FALSE	High	Master Protein	A0A088A6K7	Glutaredoxin domain-containing protein OS=Apis mellifera OX=7460 GN=LOC551916 PE=4 SV=1		0	FALSE	13.302	17	3	8	3	192	21.9	4.37		2.87				2.47	2.88		2.13								4.2	2.18		1.73		1				1	1		1
FALSE	High	Master Protein	A0A088ADE6	Glutaredoxin domain-containing protein OS=Apis mellifera OX=7460 GN=Trx/Gtx PE=4 SV=1		0.003	FALSE	3.403	4	1	1	1	223	25.3	5.26																	2.53
FALSE	High	Master Protein	A0A088A226	Glutaredoxin OS=Apis mellifera OX=7460 GN=Grx2 PE=3 SV=1		0	FALSE	12.823	32	3	4	3	133	15	7.99						3.34										4.04	3.45									2
FALSE	High	Master Protein	Q7YXM2	Glutathione peroxidase OS=Apis mellifera ligustica OX=7469 GN=Gtpx-1 PE=2 SV=1		0	FALSE	52.3	68	11	85	11	168	19.1	7.78	17.37	3.09	0	6.61	0	28.76	3.22	3.51	10		15.21	5.91	3.22	6.59	3.2	11.57	18.67	8.5	8.6	8.43	4	2	3	3	1	9	1	2	5		5	3	1	2
FALSE	High	Master Protein	A0A088AB47	Glutathione peroxidase OS=Apis mellifera OX=7460 GN=Gtpx2 PE=3 SV=1		0	FALSE	39.292	47	8	49	8	201	23.1	5.91	19.51	0	4.26	6.21	5.1	10.67		2.53	10.12		7.13		2.56	7.49	0	4.39	4.75	7.3	3.12	5.15	6	1	2	5	2	4		1	4		2		1	3
FALSE	High	Master Protein	C3VMN1	Glutathione S-transferase S1 OS=Apis mellifera OX=7460 GN=GstS1 PE=2 SV=1		0	FALSE	13.365	18	3	15	3	204	23.7	8.81		3.01	2.67	2.57		3.26			3.95					7.66	4.45			2.53	0			1	1	1		1			2					2
FALSE	High	Master Protein	R0MC05	Glyceraldehyde-3-phosphate dehydrogenase 2 OS=Nosema bombycis (strain CQ1 / CVCC 102059) OX=578461 GN=G3P2 PE=4 SV=1		0.004	FALSE	3.223	7	1	1	1	203	22.6	8.38				2.48																				1
FALSE	High	Master Protein	A0A088AHC8	Glyceraldehyde-3-phosphate dehydrogenase OS=Apis mellifera OX=7460 GN=Gapdh PE=2 SV=1		0	FALSE	153.559	64	15	412	13	333	35.9	8.02	53.68	109.53	53.66	18.46	15.91	164.18	91.25	100.44	27.72	26.9	92.21	133.55	58.58	93.77	43.47	44.61	52.02	58.44	26.9	152.58	8	11	9	5	5	13	12	10	9	7	12	11	8	10
FALSE	High	Master Protein	V5T859	Glyceraldehyde-3-phosphate dehydrogenase OS=Bifidobacterium sp. Bin2N OX=1293822 PE=3 SV=1		0.001	FALSE	5.225	7	2	2	1	351	37.6	5.58												0								1.93												1
FALSE	High	Master Protein	A0A087ENY4	Glyceraldehyde-3-phosphate dehydrogenase OS=Lactobacillus kunkeei OX=148814 GN=gap-3 PE=3 SV=1		0	FALSE	29.664	28	7	10	6	337	36.3	5.25							2.97					26.28								1.93							1					6
FALSE	High	Master Protein	A0A0P0QFJ0	Glyceraldehyde-3-phosphate dehydrogenase OS=Serratia marcescens OX=615 GN=AR325_16545 PE=3 SV=1		0	FALSE	6.709	5	2	35	1	331	35.5	6.81	2.06	4.38	1.95			10.84	3.74	4.6	2.06	2.3	4.51	5.82	2.11	7.1	2.07	2	2.55	4.27	1.99	11.42	1	2	1			2	1	1	1	1	1	1	1	2
FALSE	High	Master Protein	O61368	Glycerol-3-phosphate dehydrogenase [NAD(+)] OS=Apis mellifera OX=7460 GN=Gpdh PE=3 SV=1		0	FALSE	157.64	74	23	183	23	363	40.1	7.06	13.55	42.36	21.69	5.11	2.28	76.29	47.75	26.04	5.42		78.34	55.99	8.44	37.81	13.57	9.5	21.89	30.78	4.24	36.89	4	10	9	2	1	16	10	6	3		16	13	3	9
FALSE	High	Master Protein	A0A087ZRH2	Glycerol-3-phosphate dehydrogenase [NAD(+)] OS=Apis mellifera OX=7460 PE=3 SV=1		0	FALSE	39.24	40	9	14	9	285	31.2	5.57		2.07		0		14.93			2.11		3.19		2.9						3.02	7.73		1		1		4			1		1		1
FALSE	High	Master Protein	A0A087ZSL0	Glycerol-3-phosphate dehydrogenase OS=Apis mellifera OX=7460 PE=3 SV=1		0	FALSE	257.09	59	36	509	36	753	84.2	6.81	80.85	76.95	90.68	25.21	34.83	120.41	119.75	155.12	20.02	57.16	73	61.63	113.3	65.68	90.95	52.65	32.99	62.44	47.85	24.3	17	15	21	9	11	23	24	28	9	16	17	15	18	17
FALSE	High	Master Protein	A0A087ZUC1	Glyco_18 domain-containing protein OS=Apis mellifera OX=7460 GN=100577156 PE=4 SV=1		0	FALSE	29.673	24	7	14	7	390	43.8	6.27						8.83			4.46					2.65	2.61					7.31						3			3					1
FALSE	High	Master Protein	A0A088AMK2	Glyco_18 domain-containing protein OS=Apis mellifera OX=7460 PE=4 SV=1		0	FALSE	127.19	49	17	413	17	449	50.1	8.44	123.24	33.82	16.59	20.75	38.94	115.27	49.09	78.01	33.36	26.86	122.63	35.28	53.94	83.72	28.51	45.99	47.49	23.63	13.66	19.03	15	7	5	6	10	14	10	13	9	8	13	8	11	12
FALSE	High	Master Protein	A0A088A3B7	Glyco_transf_20 domain-containing protein OS=Apis mellifera OX=7460 PE=4 SV=1		0	FALSE	96.395	32	19	133	19	771	87.2	6.62	20.99	29.07	2.44	14.52		48.78	33.37	11.4	5.28		38.37	27.1	14.08	26.29	0	17.03	9.39	32.35	5.54	24.15	6	8	2	7		11	8	4	3		12	8	5	8
FALSE	High	Master Protein	A0A088ARU9	Glycogen [starch] synthase OS=Apis mellifera OX=7460 GN=LOC552328 PE=3 SV=1		0	FALSE	19.559	8	4	5	4	692	79.6	6.42		3.15														2.1	3.31	1.71		3.91		1
FALSE	High	Master Protein	A0A088AMF3	Glycylpeptide N-tetradecanoyltransferase OS=Apis mellifera OX=7460 PE=3 SV=1		0	FALSE	6.598	8	2	4	2	471	54.9	8.72		2.34				0											0					1				1
FALSE	High	Master Protein	A0A087ZVX4	GMC_OxRdtase_N domain-containing protein OS=Apis mellifera OX=7460 GN=GMCOX12 PE=4 SV=1		0	FALSE	14.258	9	3	3	3	622	69.4	6.96												5.61																				3
FALSE	High	Master Protein	A0A087ZVX2	GMC_OxRdtase_N domain-containing protein OS=Apis mellifera OX=7460 PE=4 SV=1		0	FALSE	43.277	20	7	11	7	650	73	6.25						2.91			1.61		16.95	3.34		2.79						0						1			1		5	1		1
FALSE	High	Master Protein	A0A088A031	GMC_OxRdtase_N domain-containing protein OS=Apis mellifera OX=7460 PE=4 SV=1		0	FALSE	298.847	54	24	492	24	615	67.8	6.84	27.37	51.21	21.25		112.25	41.06	130.9		2.1	61.54	109.14	157.41	3.43	85.58	147.31	29.63	57.83	14.58	62.29	436.55	7	10	9		20	12	16		2	12	15	20	1	16
FALSE	High	Master Protein	A0A087ZP87	GOLD domain-containing protein OS=Apis mellifera OX=7460 GN=102655603 PE=3 SV=1		0.006	FALSE	2.888	6	1	1	1	202	23.3	6.52											2.3																				1
FALSE	High	Master Protein	A0A088AGB1	GOLD domain-containing protein OS=Apis mellifera OX=7460 GN=LOC412554 PE=3 SV=1		0	FALSE	39.138	29	6	18	6	215	25.3	7.01		3.61	3.3				13.83	5.42		3.07	3.91		3.79		3.61			2.91	2.95	7.8		1	1				4	2		1	1		1
FALSE	High	Master Protein	A0A088ANQ5	GOLD domain-containing protein OS=Apis mellifera OX=7460 GN=LOC552602 PE=3 SV=1		0	FALSE	17.159	21	4	24	4	205	23.4	5.62	4.88	2.11				4.42	2.55	5.02	0		2.73	2.48		2.08	2.48	1.99	2.44	12.32	6.17	2.61	2	1				2	1	2	1		1	1		1
FALSE	High	Master Protein	A0A087ZNT8	GOLD domain-containing protein OS=Apis mellifera OX=7460 PE=3 SV=1		0	FALSE	27.698	21	4	46	4	202	23.4	7.33	8.5	8.15	7.35	3.63	7.63	15.97	10.87	12.94	6.09	9.91	12.68	12.25	6.25	14.02	7.99		3.71	2.03	0	4.1	1	1	1	1	1	3	1	1	1	1	2	1	1	3
FALSE	High	Master Protein	A0A088AHI6	GP-PDE domain-containing protein OS=Apis mellifera OX=7460 PE=4 SV=1		0	FALSE	26.071	25	5	18	5	273	32.2	8.35	2.08		6.26		2.74	3.83	4.1	6.57		2.54	6.58	3.9	3.56	6.33	2.93	0		3.49			1		1		1	1	1	2		1	2	1	1	2
FALSE	High	Master Protein	A0A087ZV12	Gram-negative bacteria-binding protein 1-2 OS=Apis mellifera OX=7460 GN=B-gluc1 PE=4 SV=1		0.001	FALSE	4.628	4	2	2	2	478	54.6	6.48											0					1.99															1
FALSE	High	Master Protein	A0A088AGJ6	GrpE protein homolog OS=Apis mellifera OX=7460 PE=3 SV=1		0	FALSE	6.295	9	2	5	2	232	26.4	8.1									1.81		2.63			2.05		4.26													1		1			1
FALSE	High	Master Protein	A0A088A654	GST C-terminal domain-containing protein OS=Apis mellifera OX=7460 GN=100577000 PE=4 SV=1		0	FALSE	7.265	9	1	4	1	171	20.1	5.21	3.05	3.35					3.02				3.77										1	1					1				1
FALSE	High	Master Protein	A0A088ADT5	GST N-terminal domain-containing protein OS=Apis mellifera OX=7460 GN=GstU1 PE=4 SV=1		0	FALSE	6.179	21	1	12	1	67	7.7	4.83	4.19					4.02		4.47	2.49		4.78	3.61	4.22	4.56		7.75	4.16	3.25			1					1		1	1		1	1	1	1
FALSE	High	Master Protein	A0A087ZWI7	GTP-binding nuclear protein OS=Apis mellifera OX=7460 GN=ran PE=3 SV=1		0	FALSE	68.582	63	12	157	12	215	24.6	7.42	29.39	18.56	18.93	16.92	15.74	38.94	17.36	29.23	16.19	10.15	34.59	19.62	20.36	30.17	15.41	17.59	13.15	13.83	9.46	9.35	5	5	4	3	4	9	4	7	4	3	7	4	5	6
FALSE	High	Master Protein	L0AQJ6	GTP-binding protein OS=Frischella perrara OX=1267021 GN=typA PE=4 SV=1		0	FALSE	8.108	2	1	2	1	608	67.5	5.52												5.62																				1
FALSE	High	Master Protein	A0A088A648	Guanylate kinase-like domain-containing protein OS=Apis mellifera OX=7460 GN=LOC552023 PE=4 SV=1		0	FALSE	8.464	11	2	2	2	208	23.8	8.12																2.06		2.43
FALSE	High	Master Protein	A0A087ZRE7	H/ACA ribonucleoprotein complex subunit OS=Apis mellifera OX=7460 GN=LOC413686 PE=3 SV=1		0	FALSE	9.618	18	3	5	3	201	21	11.02	2.62						3.97						2.02	1.92							1						2						1	1
FALSE	High	Master Protein	A0A088A802	H15 domain-containing protein OS=Apis mellifera OX=7460 PE=3 SV=1		0	FALSE	43.147	22	7	42	7	295	32.9	10.33	12.88	9.68	4.91	3.31	2.97	21.92	8.37	6.03	8.56	2.87		2.6		5.09			2.92	13.27	5.99		3	2	2	1	1	7	3	2	4	1		1		2
FALSE	High	Master Protein	A0A088A4Q4	HABP4_PAI-RBP1 domain-containing protein OS=Apis mellifera OX=7460 GN=LOC409410 PE=4 SV=1		0	FALSE	24.453	11	4	35	4	414	46.9	8.87	6.2	4.84			0	9.07	10.51	6.13	5.32	5.84	11.31		3.52	5.01	3	9.47	5.09	5.89			2	1			1	3	4	2	3	3	4		2	2
FALSE	High	Master Protein	H9KUJ6	HATPase_c domain-containing protein OS=Apis mellifera OX=7460 GN=LOC412150 PE=3 SV=1		0	FALSE	193.3	53	33	284	31	798	92.1	5.07	47.53	52.45	26.85	8.99	17.24	61.17	56.24	29.72	12.16	19.35	82.28	46.89	37.8	47.72	29.77	35.36	62.73	71.96	20.3	30.59	12	14	9	5	8	13	16	8	8	5	20	12	11	13
FALSE	High	Master Protein	A0A088A2L4	HATPase_c domain-containing protein OS=Apis mellifera OX=7460 PE=3 SV=1		0	FALSE	154.496	36	28	181	16	755	87.1	5.2	27.24	16.21	9.37	9.66	10.34	58.5	12.93	14.53	11.51	2.4	56.72	16.86	19.55	54.96	13.09	38.37	16.93	35.17	17.83	22.16	9	4	4	4	5	14	4	4	3	1	15	7	4	14
FALSE	High	Master Protein	A0A087ZQD3	HATPase_c domain-containing protein OS=Apis mellifera OX=7460 PE=3 SV=1		0	FALSE	337.956	64	45	499	31	724	83.4	5.05	82.25	57.43	32.64	25.95	40.27	156.46	46.36	54.67	39.41	15.4	157.55	35.89	71.19	117.1	55.03	72.89	65.14	85.79	57.79	67.87	20	14	13	11	17	28	15	16	14	6	32	13	19	26
FALSE	High	Master Protein	A0A088AT34	Hcy-binding domain-containing protein OS=Apis mellifera OX=7460 GN=LOC550789 PE=4 SV=1		0.001	FALSE	4.792	6	1	1	1	320	35.5	6.43																	3.17
FALSE	High	Master Protein	A0A0S1MMB1	Heat shock protein 70-2 OS=Antheraea pernyi OX=7119 PE=2 SV=1		0	FALSE	43.545	12	6	115	1	634	70.1	5.74	18.58	8.85	7.42	3.6		27.99	15.69	11.34	11.32	2.98	23.12	11.21	21.51	25.34	7.38	14.71	32.88	32.99	19.87	11.37	4	2	3	2		4	2	3	3	1	4	2	3	5
FALSE	High	Master Protein	Q5TLD7	Heme oxygenase OS=Apis mellifera OX=7460 GN=AmHO PE=2 SV=1		0.002	FALSE	4.382	5	1	1	1	247	29.2	8.94																		3.41
FALSE	High	Master Protein	A0A088AQM3	HIG1 domain-containing protein OS=Apis mellifera OX=7460 GN=102656599 PE=4 SV=1		0	FALSE	6.079	11	1	3	1	106	11.9	9.36			6.24	2.78																			1	1
FALSE	High	Master Protein	A0A088A803	Histone H2A OS=Apis mellifera OX=7460 GN=726468 PE=3 SV=1		0	FALSE	120.383	60	6	513	4	124	13.4	10.73	71.32	65.82	47.45	24.3	38.83	62.52	57.65	59.34	44.39	48.04	68.78	60.26	61.63	72.25	35.66	148.1	68.07	125.28	87.11	45.17	4	5	4	3	4	4	4	4	4	4	5	5	4	5
FALSE	High	Master Protein	A0A087ZWQ7	Histone H2A OS=Apis mellifera OX=7460 GN=His2Av PE=3 SV=1		0	FALSE	38.015	54	5	262	3	128	13.4	10.58	21.71	18.62	15.29	4.05	13.1	21.54	24.81	18.98	14.69	15.38	27.63	16.34	19.15	29.13	11.74	34.81	18.46	62.34	19.73	7.22	3	2	3	1	2	2	3	3	3	3	3	4	2	4
FALSE	High	Master Protein	A0A088A824	Histone H2B OS=Apis mellifera OX=7460 GN=725344 PE=3 SV=1		0	FALSE	58.618	37	5	498	3	123	13.7	10.39	50.5	53.55	52.16	44.92	48.42	41.21	30.02	44.8	38.9	36.49	50.96	42.88	45.51	57.79	55	182.51	50.28	87.98	30.02	32.47	4	4	5	5	5	4	3	4	4	4	4	4	4	4
FALSE	High	Master Protein	A0A088A805	Histone H2B OS=Apis mellifera OX=7460 GN=726487 PE=3 SV=1		0	FALSE	37.93	28	3	290	1	126	14	10.32	35.56	32.43	35.13	26.32	33.89	24.45	24.26	32.75	18.91	34.68	30.05	22.08	27.88	38.27	33.31	5.17	1.43	6.37	8	5	2	2	3	3	3	2	2	2	2	2	2	2	2	2
FALSE	High	Master Protein	A0A088A825	Histone H2B OS=Apis mellifera OX=7460 GN=LOC725238 PE=3 SV=1		0	FALSE	118.669	36	12	312	12	224	23.6	10.49	75.48	60.04	54.83	60.11	70.2	56.55	58.63	59.92	52.72	44.89	39.57	23.54	28.48	38.42	35.09	44.96	54.69	56.04	55.7	2.31	6	4	7	8	8	5	6	7	6	6	3	3	4	3
FALSE	High	Master Protein	H9K244	Histone H3 OS=Apis mellifera OX=7460 GN=LOC726542 PE=3 SV=1		0	FALSE	81.037	57	8	398	1	136	15.4	11.27	116.96	84.01	71.56	19.73	42.9	57.96	38.82	41.81	22.07	49.97	70.04	47.73	50.54	58.82	48.37	30.96	16.2	28.14	8.79	32.17	6	6	6	5	5	6	6	6	6	6	5	4	6	5
FALSE	High	Master Protein	H9K759	Histone H3 OS=Apis mellifera OX=7460 GN=LOC726692 PE=3 SV=1		0	FALSE	61.826	57	8	350	1	136	15.3	11.27	99.59	85.62	63.82	23.63	33.79	62.39	54.48	45.78	25.33	57.92	64.3	48	47.2	42.93	34.93	27.77	18.94	19.24	15.86	19.82	6	6	6	5	5	6	6	6	6	6	5	4	6	5
FALSE	High	Master Protein	H9KL77	Histone H4 OS=Apis mellifera OX=7460 GN=724757 PE=3 SV=1		0	FALSE	116.968	60	10	789	10	103	11.4	11.36	114.47	115.95	92.57	68.14	81.12	82.62	74.12	95.28	74.38	91.26	88.63	76.04	76.96	92.98	82.91	128.35	78.15	242.52	112	186.72	9	8	9	8	9	7	8	9	8	7	8	7	7	8
FALSE	High	Master Protein	A0A088ANV4	HIT domain-containing protein OS=Apis mellifera OX=7460 GN=LOC552803 PE=4 SV=1		0.003	FALSE	3.447	8	1	2	1	142	16.8	8.73												0						2.13														1
FALSE	High	Master Protein	A0A088AA27	HIT domain-containing protein OS=Apis mellifera OX=7460 PE=4 SV=1		0	FALSE	39.355	40	3	41	3	126	14	7.59	7.72	9.05	13.72	7.62	3.39	14.04	8.84	8.4	9.75		25.61	9.75	4.51	16.81	7.42		9.95	3.13			1	1	1	1	1	1	1	1	2		3	2	1	2
FALSE	High	Master Protein	A0A088AV07	HMA domain-containing protein OS=Apis mellifera OX=7460 GN=LOC725138 PE=4 SV=1		0.002	FALSE	4.042	24	1	4	1	72	8	6.54						3.91	0				0															1	1				1
FALSE	High	Master Protein	A0A088A8Z0	HMG box domain-containing protein OS=Apis mellifera OX=7460 GN=LOC551877 PE=4 SV=1		0.002	FALSE	3.572	6	1	1	1	202	23.3	8.69					0																				1
FALSE	High	Master Protein	A0A087ZV67	HTH La-type RNA-binding domain-containing protein OS=Apis mellifera OX=7460 GN=LOC411476 PE=4 SV=1		0	FALSE	13.345	5	2	4	2	662	71.3	6.99	3.31					2.2					4.51							1.71			1					1					1
FALSE	High	Master Protein	Q10416	Hymenoptaecin OS=Apis mellifera OX=7460 PE=2 SV=1		0	FALSE	13.154	30	3	7	3	129	14.5	9.42								3.12		9.06				7.66														1		2				2
FALSE	High	Master Protein	Q6WL04	Hyperpolarization-activated ion channel OS=Apis mellifera OX=7460 PE=2 SV=1		0	FALSE	9.503	4	2	3	2	632	72.7	7.5						3.97		3.97										1.91								1		1
FALSE	High	Master Protein	A0A088AEI7	I/LWEQ domain-containing protein OS=Apis mellifera OX=7460 PE=4 SV=1		0	FALSE	147.119	55	21	188	21	490	53.3	6.4	35.79	19.44	10.82	15.02	7.1	59.38	48.34	21.47	28.2	23.6	46.79	20.97	29.86	27.2	8.64	16.26	47.26	25.32	15.09		8	7	5	6	3	13	9	7	10	7	12	7	7	7
FALSE	High	Master Protein	A0A096XH51	Icarapin variant 1 (Fragment) OS=Apis mellifera carnica OX=88217 GN=icarapin PE=2 SV=1		0	FALSE	37.009	30	6	34	6	204	22.7	4.56	2.07			2.56		3.76	9.37	11.4	3.34	20.7	3.88	14.56	2.15			6.87	3.94	7.5			1			1		1	3	4	2	4	1	3	1
FALSE	High	Master Protein	A0A087ZP77	IF3_N domain-containing protein OS=Apis mellifera OX=7460 PE=4 SV=1		0.003	FALSE	3.404	4	1	1	1	227	26.8	9.61	2.03																				1
FALSE	High	Master Protein	A0A087ZMS1	Importin N-terminal domain-containing protein OS=Apis mellifera OX=7460 GN=emb PE=4 SV=1		0	FALSE	50.893	13	10	24	10	1062	122.3	5.6						12.85					13.86	3.49		9.93		1.78	9.51	11.32		2.23						3					4	1		4
FALSE	High	Master Protein	A0A088A9P3	Importin N-terminal domain-containing protein OS=Apis mellifera OX=7460 GN=LOC412817 PE=4 SV=1		0	FALSE	19.686	10	6	15	6	1080	121.4	4.84	2.74	2.89				6.14	0	0			4.92	2.44		0							1	2				4	1	1			1	1		2
FALSE	High	Master Protein	A0A088AF88	Importin N-terminal domain-containing protein OS=Apis mellifera OX=7460 GN=Ranbp16 PE=4 SV=1		0	FALSE	6.462	2	2	2	2	1100	125.3	6.34		1.88															3.46					1
FALSE	High	Master Protein	A0A088AFX0	Importin N-terminal domain-containing protein OS=Apis mellifera OX=7460 PE=4 SV=1		0.001	FALSE	5.063	1	1	3	1	1011	115.7	5.34						2.47	2.26				2.19															1	1				1
FALSE	High	Master Protein	A0A088ABZ7	Importin N-terminal domain-containing protein OS=Apis mellifera OX=7460 PE=4 SV=1		0	FALSE	22.269	7	4	9	4	1029	117.8	5.03						0				0	7.53	3.46		3.56				0								1				1	4	1		1
FALSE	High	Master Protein	A0A087ZMX9	Importin N-terminal domain-containing protein OS=Apis mellifera OX=7460 PE=4 SV=1		0	FALSE	68.927	19	12	73	12	890	98.8	4.86	17.04	16.39				26.83	9.81	8		2.55	33.29	12.05	19.34	24.21	0	3.56	4.25	7.26	2.05	2.35	5	4				6	4	5		2	8	4	5	7
FALSE	High	Master Protein	A0A088ADV7	Importin subunit alpha OS=Apis mellifera OX=7460 GN=Kap-alpha1 PE=3 SV=1		0	FALSE	7.792	4	2	10	2	530	58.7	5.34		2.79				2.42	2.71				2.31		0	0		1.87		2.64				1				1	1				1		1	1
FALSE	High	Master Protein	A0A088ANJ0	Importin subunit alpha OS=Apis mellifera OX=7460 GN=Kap-alpha3 PE=3 SV=1		0	FALSE	43.513	23	6	45	6	516	57.3	5.17	7.38	16.16		0		19.31	12.52			0	24.93	19.44	7.13	10.85		3.38	3.79	12.18	8.02		2	2		1		4	2			1	5	3	2	3
FALSE	High	Master Protein	A0A088A2D4	Innexin OS=Apis mellifera OX=7460 GN=inx PE=3 SV=1		0	FALSE	13.613	13	3	20	3	256	30.1	8.72	2.62	2.45	2.45			5.27	2.94	5.33		2.1	7.71	2.75	2.08	2.56	4.27	3.31		3.34		2.88	1	1	1			2	1	1		1	2	1	1	1
FALSE	High	Master Protein	A0A088A2D3	Innexin OS=Apis mellifera OX=7460 GN=inx PE=3 SV=1		0	FALSE	11.181	21	2	17	2	149	17	6.65	6.68	2.67	3.53		1.62		2.5	2.49			6.45		6.29	6.97	2.31	3.72		4.12			2	1	1		1		1	1			2		2	2
FALSE	High	Master Protein	A0A088A2C9	Innexin OS=Apis mellifera OX=7460 GN=inx2 PE=3 SV=1		0	FALSE	51.025	22	6	86	6	358	41.5	6.84	13.5	20.66	18.32	4.54	12.92	11.22	15.99	20.24		12.78	16.42	17.9	17.27	15.95	16.21	2.21		8.71	2.41	2.31	3	4	4	2	5	3	3	4		4	3	4	4	4
FALSE	High	Master Protein	A0A088AID2	Innexin OS=Apis mellifera OX=7460 GN=inx3 PE=3 SV=1		0	FALSE	28.298	20	6	67	6	396	44.6	7.68	13.21	5.04	4.89	2.37	4.66	9.48	16.32	20.18	2.11	11.84	10.22	1.93	12.47	8.55	5.37	10.38	2.42	14.47	8.15	2.36	5	2	2	1	2	3	4	6	1	3	3	1	4	2
FALSE	High	Master Protein	A0A088A653	Inosine-5'-monophosphate dehydrogenase OS=Apis mellifera OX=7460 GN=ras PE=3 SV=1		0	FALSE	8.544	9	3	6	3	523	56.6	8.15				0		0	0					0						2.23	2.23					1		1	1					1
FALSE	High	Master Protein	A0A088AVE7	Inositol-1-monophosphatase OS=Apis mellifera OX=7460 GN=726463 PE=3 SV=1		0	FALSE	10.41	8	2	2	2	276	30.8	6.43									5.39																				2
FALSE	High	Master Protein	A0A088A4S7	Inositol-1-monophosphatase OS=Apis mellifera OX=7460 GN=LOC409693 PE=3 SV=1		0.001	FALSE	4.859	6	1	1	1	272	29.8	5.82														4.25																				1
FALSE	High	Master Protein	A0A088AEN2	Integrin alpha-PS2 OS=Apis mellifera OX=7460 PE=3 SV=1		0	FALSE	257.155	33	42	418	42	1525	172.2	5.86	90.99	57.52	71.3	68.53	59.34	67.07	61.59	60.78	74.03	56.03	53.75	44.3	68.92	58.47	49	50.52	28.75	46.7	49.01	40.99	15	12	19	20	17	18	17	15	20	17	14	13	19	14
FALSE	High	Master Protein	A0A088A788	Integrin beta OS=Apis mellifera OX=7460 PE=3 SV=1		0	FALSE	175.481	40	22	318	22	761	84.9	5.49	62.18	45.27	62.01	41.47	31.76	49.07	55.89	72.3	15.6	53.56	45.94	29.82	61.43	50.36	51.83	30.19	23.97	28.28	11.89	12.56	13	12	15	10	9	11	11	17	6	13	12	8	15	12
FALSE	High	Master Protein	A0A088ACX9	Integrin_alpha2 domain-containing protein OS=Apis mellifera OX=7460 GN=mew PE=3 SV=1		0	FALSE	40.043	9	8	40	8	1101	123.7	6.18	2.55	0	6.98	2.33	2.02	5.31	2.54	10.7	0	6.6	4.78	2.62		3.03	4.89	2.74	3.23	2.36	1.99		1	1	3	1	1	2	1	4	1	4	2	1		3
FALSE	High	Master Protein	A0A088AKC5	Iso_dh domain-containing protein OS=Apis mellifera OX=7460 GN=LOC410396 PE=4 SV=1		0	FALSE	109.017	44	12	173	12	384	42.4	8.97	52.96	30.62	37.3	9.74	6.3	66.56	34.84	30.32	13.69	6.73	54.81	29.31	50.63	38.97	33.93	26.4	10.63	13.76	10.8	7.5	7	5	8	3	2	10	5	5	4	2	6	5	8	8
FALSE	High	Master Protein	A0A088AA38	Isochorismatase domain-containing protein OS=Apis mellifera OX=7460 GN=LOC410420 PE=4 SV=1		0	FALSE	21.735	31	5	42	5	203	22.4	8.35	7.42	2.92	5.81			10.76	2.84		2.52		7.87	5.86	2.99	8.05	4.95	13.09	2.55	7.86	13.66	2.52	3	1	1			3	2		1		2	2	1	3
FALSE	High	Master Protein	A0A088AAU7	Isocitrate dehydrogenase [NAD] subunit, mitochondrial OS=Apis mellifera OX=7460 GN=LOC409292 PE=3 SV=1		0	FALSE	143.962	56	18	365	18	358	39.1	7.59	78.94	52.21	57.25	4.93	1.96	90.74	53.33	50.16	19.87	4.29	66.09	42.06	53.12	61.17	47.82	56.87	33.75	46.3	56.19	41.7	13	12	12	3	2	15	10	11	7	2	12	10	11	14
FALSE	High	Master Protein	A0A088ABZ1	Isocitrate dehydrogenase [NAD] subunit, mitochondrial OS=Apis mellifera OX=7460 GN=LOC552128 PE=3 SV=1		0	FALSE	97.052	48	12	176	12	374	40.9	8.7	43.25	18.45	39.41	1.6	0	52.25	31.95	20.49	0		53.94	33.2	39.97	30.5	27.2	33.89	5.59	10.24	4.4	17.89	7	6	8	1	1	9	6	7	2		10	6	11	8
FALSE	High	Master Protein	A0A088A1Z9	Isocitrate dehydrogenase [NADP] OS=Apis mellifera OX=7460 PE=3 SV=1		0	FALSE	143.268	62	23	274	23	409	46.6	7.3	49.84	15.11	21.74	8.54	1.92	92.74	24.97	26.09	4.52	9.27	86.41	31.18	16.73	49.99	19.66	30.25	23.2	44.77	6.08	46.44	12	5	10	4	2	21	6	7	3	3	18	11	4	14
FALSE	High	Master Protein	A0A087ZRF8	J domain-containing protein OS=Apis mellifera OX=7460 GN=LOC408863 PE=4 SV=1		0	FALSE	39.405	42	5	10	5	176	19.9	6.21						19.85								3.23		6.47										5								1
FALSE	High	Master Protein	A0A087ZSR8	J domain-containing protein OS=Apis mellifera OX=7460 GN=LOC408966 PE=4 SV=1		0	FALSE	24.894	18	3	19	3	290	32.6	9.47			2.65	2.19		2.8	4.96	4.95	2.46	3.02	3.89		7.96	4.71	2.39	3.07							1	1		1	2	1	1	1	1		2	1
FALSE	High	Master Protein	A0A087ZY83	J domain-containing protein OS=Apis mellifera OX=7460 GN=LOC409991 PE=4 SV=1		0	FALSE	16.616	6	3	16	3	561	64	8.06	2.5	2.25	1.82	2.34	2.03	4.95	2.89	2.84		2.7	2.68		2.95	2.34		2.83		5.62			1	1	1	1	1	1	1	1		1	1		1	1
FALSE	High	Master Protein	A0A088A635	J domain-containing protein OS=Apis mellifera OX=7460 GN=LOC411071 PE=4 SV=1		0	FALSE	85.026	53	15	172	15	354	39.1	9.13	51.59	28.51	24.85	11.76	12.07	47.92	29.96	26.95	26.86	17.65	53.72	21.89	23.65	26.94	9.92	22.78	23.11	6.95	6.97	1.89	11	7	6	5	5	9	8	9	9	5	12	6	8	9
FALSE	High	Master Protein	A0A088ABA4	J domain-containing protein OS=Apis mellifera OX=7460 GN=LOC412505 PE=4 SV=1		0	FALSE	17.162	7	4	7	4	761	88.2	6.52							1.69	2.61				2.22						4.53	2.56	1.93							1	1				1
FALSE	High	Master Protein	A0A088AL57	J domain-containing protein OS=Apis mellifera OX=7460 GN=Rme-8 PE=4 SV=1		0.004	FALSE	3.261	1	1	1	1	2231	254.6	7.24							1.71																				1
FALSE	High	Master Protein	A0A088ATN4	J domain-containing protein OS=Apis mellifera OX=7460 PE=4 SV=1		0	FALSE	16.537	5	4	7	4	830	95.4	6.74							2.94	3.48		6.97					0		2.1										1	1		3
FALSE	High	Master Protein	A0A088AJE9	J domain-containing protein OS=Apis mellifera OX=7460 PE=4 SV=1		0	FALSE	7.679	8	2	5	2	358	40.4	5.85																	3.18	5.41	0	0
FALSE	High	Master Protein	A0A088AEP5	J domain-containing protein OS=Apis mellifera OX=7460 PE=4 SV=1		0	FALSE	15.961	13	2	19	2	223	24.4	5.11	8.34		0	2.26	0	8.19					3.41		3.33			3.1	3.41	3.47	1.88		2		1	1	1	2					1		1
FALSE	High	Master Protein	A0A088AUA1	KA1 domain-containing protein OS=Apis mellifera OX=7460 PE=4 SV=1		0	FALSE	6.054	13	1	4	1	135	15.2	8.94								2.04				2.82		4.38		2.57												1				1		1
FALSE	High	Master Protein	A0A087ZMR7	KASH domain-containing protein OS=Apis mellifera OX=7460 PE=4 SV=1		0	FALSE	275.225	13	66	140	66	7454	850.8	4.86	11.43	2.05	5.43			28.42	34.91	9.78		3.74	22.47	10.04	11.34	7.47	8.79	26.77	61.68	35.32	2.45	14.8	8	1	3			10	13	5		5	10	5	5	5
FALSE	High	Master Protein	A0A088AEW6	Kazal-like domain-containing protein OS=Apis mellifera OX=7460 GN=102656354 PE=4 SV=1		0	FALSE	11.14	18	1	6	1	119	12.4	8.54									2.73	2.88		4.19					4			4.13									1	1		1
FALSE	High	Master Protein	A0A088AGZ4	KH domain-containing protein OS=Apis mellifera OX=7460 GN=408710 PE=4 SV=1		0	FALSE	53.85	24	9	96	9	397	45.3	8.84	16.45	14.36	2.28	4.17	4.93	23.77	19.09	17.35	4.96	4.46	10.8	2.5	4.22	9.12	2.27	0	8	11.81	2.77	0	4	5	3	1	2	5	5	5	2	3	2	2	2	3
FALSE	High	Master Protein	A0A087ZVJ6	KH domain-containing protein OS=Apis mellifera OX=7460 PE=4 SV=1		0	FALSE	22.316	13	2	11	2	143	15.3	7.99			3.78	0		5.77			3.42		4.46			2.68			4.16	7.16	6.7				1	1		1			1		1			1
FALSE	High	Master Protein	A0A088ADI9	KH domain-containing protein OS=Apis mellifera OX=7460 PE=4 SV=1		0	FALSE	17.623	17	4	12	4	321	35.1	7.23	2.05				0	6.22	1.61				10.67					4.3	2.2				1				1	2	1				4
FALSE	High	Master Protein	A0A087ZVJ7	KH domain-containing protein OS=Apis mellifera OX=7460 PE=4 SV=1		0	FALSE	23.463	26	5	28	5	303	30	9.01	6.98	0			0	7.98	2.12	0	0		5.74	2.26	0	4.76			3.21	3.26	0		3	1			1	2	2	2	1		2	1	1	2
FALSE	High	Master Protein	A0A088AV85	KH type-2 domain-containing protein OS=Apis mellifera OX=7460 GN=RpS3 PE=4 SV=1		0	FALSE	126.842	75	17	368	17	242	26.8	9.66	55.88	52.62	58.5	39.35	36.76	52.23	25.13	51.97	20.05	36.45	62.2	48.62	49.64	48.37	38.76	41.87	19.35	69.06	27.47	55.18	12	13	14	11	11	13	9	12	7	9	13	13	12	13
FALSE	High	Master Protein	A0A088A7G3	Kinesin-like protein OS=Apis mellifera OX=7460 PE=3 SV=1		0	FALSE	93.899	24	17	67	17	969	110.3	6.18	14.97	8.67	0		0	17.11	7.42	5.57	1.78	2.45	17.35	10.68	10.46	16.79	2.22	12.36	13.51	12.54	3.85	7.79	5	3	1		1	5	2	2	2	1	6	4	4	6
FALSE	High	Master Protein	A0A088AV41	KOW domain-containing protein OS=Apis mellifera OX=7460 GN=mRpL24 PE=3 SV=1		0	FALSE	14.767	14	3	8	3	253	30.1	9.79	2.54		2.07	0		5.59		3.34											4.13		1		1	1		2		1
FALSE	High	Master Protein	A0A088AEV2	KOW domain-containing protein OS=Apis mellifera OX=7460 GN=RpL26 PE=4 SV=1		0	FALSE	26.803	35	6	98	6	148	17.4	10.86	8.76	8.51	1.78	6.14	5.97	11.01	13.17	17.69	5.07	7.53	14.58	3.48	5.54	7.59	1.98	10.44	0	13.14	8.82	7.77	3	4	2	3	3	4	4	4	4	3	4	2	3	3
FALSE	High	Master Protein	A0A088AVX5	L51_S25_CI-B8 domain-containing protein OS=Apis mellifera OX=7460 GN=LOC727049 PE=4 SV=1		0	FALSE	22.802	63	6	71	6	94	11	9.45	4.28	0	4.19	4.21	5.19	5.05	0	3.22	12.03	5.19	10.95	8.87	9.34	9.17	8.6	5.86	5.4	1.7	1.9		2	1	2	1	2	3	1	3	6	3	4	5	4	5
FALSE	High	Master Protein	A0A088AGJ0	L51_S25_CI-B8 domain-containing protein OS=Apis mellifera OX=7460 GN=mRpL43 PE=4 SV=1		0	FALSE	12.611	16	2	22	2	191	22.5	8.73	4.9	2.72	1.61		0	7.4	8.16	6.7		2.38	4.5		4.69	2.14	0						1	1	1		1	2	2	2		1	1		1	1
FALSE	High	Master Protein	A0A087ZV44	L51_S25_CI-B8 domain-containing protein OS=Apis mellifera OX=7460 GN=mRpS25 PE=4 SV=1		0	FALSE	10.19	15	2	7	2	169	19.5	9	0		0				2.43	1.84						1.85		3.34			2.41		1		1				1	1						1
FALSE	High	Master Protein	A0A087ZZF5	Lactamase_B domain-containing protein OS=Apis mellifera OX=7460 PE=3 SV=1		0.006	FALSE	2.893	3	1	1	1	298	34.1	7.27														1.91																				1
FALSE	High	Master Protein	A0A088ALN9	Lactoylglutathione lyase OS=Apis mellifera OX=7460 PE=3 SV=1		0	FALSE	18.223	37	5	15	5	183	21.1	5.64						9.12					7.4	0		2.95		2.61		2.26		2.69						4					4	1		2
FALSE	High	Master Protein	A0A088ALQ6	Laminin N-terminal domain-containing protein OS=Apis mellifera OX=7460 PE=4 SV=1		0	FALSE	22.796	18	1	44	1	117	12.9	5.08	14.09	9.2	4.09	8.49	9.06	17.29	12.98	19.54	9.83	13.12	14.07	10.62	16.62	12.8	17.37		4.78				1	1	1	1	1	1	1	1	1	1	1	1	1	1
FALSE	High	Master Protein	A0A088A0L8	LEM domain-containing protein OS=Apis mellifera OX=7460 PE=4 SV=1		0	FALSE	77.199	20	14	109	14	788	89.3	8.32	27.88	11.14	12.48	7.79	14.3	20.96	17.9	8.9	7.69	18.2	15.19	9.27	13.29	10.88	11.91	11.8	13.56	13.45	2.98		6	4	8	2	6	7	5	3	4	7	4	2	3	3
FALSE	High	Master Protein	A0A088AAR0	Letm1 RBD domain-containing protein OS=Apis mellifera OX=7460 GN=LOC727277 PE=4 SV=1		0.001	FALSE	4.603	4	1	2	1	346	41.6	9.98			0															2.14					1
FALSE	High	Master Protein	A0A088A8B0	LIM domain-containing protein OS=Apis mellifera OX=7460 GN=LOC551547 PE=4 SV=1		0	FALSE	26.905	14	4	33	4	342	39.5	7.93	0	5.58				2.23	11.75	2.24		0	4.17	2.39	0	2.17	0						1	3				2	4	1		2	3	2	3	3
FALSE	High	Master Protein	A0A087ZXA0	Lipase domain-containing protein OS=Apis mellifera OX=7460 GN=LOC727193 PE=3 SV=1		0	FALSE	19.842	6	1	3	1	304	34.1	6.79											10.7	6.57																			1	1
FALSE	High	Master Protein	A0A088AN52	Lipase maturation factor OS=Apis mellifera OX=7460 GN=LOC724741 PE=3 SV=1		0	FALSE	32.76	12	5	63	5	648	75.6	9.26	22.71	19.65	18.15	5.8	6.69	20.78	15.99	20.9		11.06	16.72	13.22	17.94	19.86	15.15	1.61			0		4	3	3	2	2	4	3	3		3	3	4	3	4
FALSE	High	Master Protein	A0A088A7F6	Lipase OS=Apis mellifera OX=7460 PE=3 SV=1		0	FALSE	8.966	11	3	6	3	435	50.6	9.36						6.18		0			2.39						1.92									3		1			1
FALSE	High	Master Protein	A0A088A4U1	Lipase_3 domain-containing protein OS=Apis mellifera OX=7460 GN=LOC726798 PE=4 SV=1		0	FALSE	97.887	25	15	148	15	669	76.7	9.07	17.58	32.64	13.27	3.77	5.81	26.87	33.12	22.42		16.28	40.84	13.42	50.31	17.14	8.92	3.02	2.32	14.61	4.63	2.55	4	9	4	3	4	6	7	6		5	8	2	12	5
FALSE	High	Master Protein	A0A087ZUF5	Lipase_GDSL domain-containing protein OS=Apis mellifera OX=7460 GN=LOC411706 PE=4 SV=1		0.004	FALSE	3.112	3	1	1	1	421	48.3	8.53					2.1																				1
FALSE	High	Master Protein	A0A088AAT3	Lipase_GDSL domain-containing protein OS=Apis mellifera OX=7460 PE=4 SV=1		0	FALSE	6.063	6	2	3	2	407	46.7	8.25				2.18	0																			1	2
FALSE	High	Master Protein	A0A088A4R2	Lipocln_cytosolic_FA-bd_dom domain-containing protein OS=Apis mellifera OX=7460 PE=3 SV=1		0	FALSE	28.603	22	5	38	5	296	33.2	7.53	10.08	6.72	9.86	10.93	2.71	8.2	3.53	11.83	3.25	8.6		2.93		3.6	2.01	9.48	3.58	5.38	2.98		2	1	2	3	1	1	1	2	1	2		1		1
FALSE	High	Master Protein	A0A087ZZR9	Lipoyl-binding domain-containing protein OS=Apis mellifera OX=7460 GN=LOC409155 PE=4 SV=1		0	FALSE	97.356	25	10	218	10	514	55.6	9.11	61.2	45.03	46.75	17.91	26.47	51.55	53.01	36.23	29.61	30.59	33.9	24.55	51.5	55.66	34.86	4.21	6.71	23.53	11.7	23.19	7	6	7	5	5	7	7	6	6	6	6	5	6	8
FALSE	High	Master Protein	A0A087ZZD5	LisH domain-containing protein OS=Apis mellifera OX=7460 GN=LOC552605 PE=4 SV=1		0.002	FALSE	4.385	1	1	1	1	1112	124.9	5.19							2.17																				1
FALSE	High	Master Protein	A0A088A9S3	L-lactate dehydrogenase OS=Apis mellifera OX=7460 PE=3 SV=1		0	FALSE	105.532	32	14	98	14	463	51.6	9.17	3.01	11.57	2.46	10.43	0	35.9	7.25	17.13	3.08	2.06	61.3	11.6	2.97	11.16	2.64	10.11	12.61	13.83	6.79	25.24	1	3	1	3	1	9	2	6	2	1	10	4	1	3
FALSE	High	Master Protein	A0A087EN16	L-lactate dehydrogenase OS=Lactobacillus kunkeei OX=148814 GN=ldh PE=3 SV=1		0	FALSE	18.406	22	3	5	3	316	33.6	5												13.09																				3
FALSE	High	Master Protein	A0A088A462	Lon protease homolog, mitochondrial OS=Apis mellifera OX=7460 GN=LOC409459 PE=3 SV=1		0	FALSE	102.082	28	19	150	19	1012	114.7	8.4	23.97	19.08	18.08	0	1.88	35.88	31.64	16.11	6.97	9.18	39.5	28.62	36.19	16.63	11.1	14.1	20.58	11.92	10.89	9.85	8	3	8	1	2	10	7	5	3	4	11	8	10	6
FALSE	High	Master Protein	A0A088AI22	LRRCT domain-containing protein OS=Apis mellifera OX=7460 PE=4 SV=1		0	FALSE	7.713	3	2	6	2	691	76	5.05	5.45	2.79										0		1.91							2	2										1		1
FALSE	High	Master Protein	A0A088AEZ9	L-type lectin-like domain-containing protein OS=Apis mellifera OX=7460 GN=Lman2 PE=4 SV=1		0	FALSE	27.282	20	5	14	5	324	37.1	6.73							0	1.69		4.03	2.76		2.66		0		4.15	6.39	5.36	5.95							1	1		2	1		1
FALSE	High	Master Protein	A0A088AEI5	L-type lectin-like domain-containing protein OS=Apis mellifera OX=7460 GN=LOC550798 PE=4 SV=1		0	FALSE	65.483	36	11	39	11	504	57.8	6.38	2.26	3.14	6.43			13.75	18.74	6.81		3.92	18.44	4.65	3.02		6.38	3.85	16.87	5.1		3.11	1	1	2			4	7	2		2	5	1	1
FALSE	High	Master Protein	A0A088AHQ9	Lyase_1 domain-containing protein OS=Apis mellifera OX=7460 PE=3 SV=1		0	FALSE	163.492	54	17	236	17	439	47.7	7.77	70.07	45.36	55.6		2.01	111.72	47.23	29.1	3.38		67.19	33.51	33.7	47.67	29.6	46.39	52.62	18.57	13.81	16.89	11	9	9		1	14	9	9	2		11	8	9	11
FALSE	High	Master Protein	A0A088ACI9	Lysine--tRNA ligase OS=Apis mellifera OX=7460 GN=Aats-lys PE=3 SV=1		0.002	FALSE	4.126	2	2	3	2	587	67.6	6.51											0			0						0											1			1
FALSE	High	Master Protein	A0A088A601	LysM domain-containing protein OS=Apis mellifera OX=7460 PE=4 SV=1		0	FALSE	22.438	5	4	5	4	1255	140.3	5.4	3.14								3.01									4.7		2.6	1								1
FALSE	High	Master Protein	A0A088ADA3	M16C_associated domain-containing protein OS=Apis mellifera OX=7460 GN=PITRM1 PE=4 SV=1		0	FALSE	52.756	20	11	25	11	1033	119.5	6.77	10.92		0			20.93					12.26	0		0		4.8	2.52			0	3		1			6					6	1		3
FALSE	High	Master Protein	A0A087ZSU7	M20_dimer domain-containing protein OS=Apis mellifera OX=7460 GN=LOC408969 PE=4 SV=1		0	FALSE	10.604	9	3	5	3	401	45.3	5.44						5.33					1.86						3.27			1.61						2					1
FALSE	High	Master Protein	A0A088ADU9	M20_dimer domain-containing protein OS=Apis mellifera OX=7460 GN=LOC412393 PE=4 SV=1		0	FALSE	96.253	48	18	89	18	481	54.2	6.43	13.79					75.96					47.93	6.39		24.52		27.2	12.08	25.01	2.2	19.49	5					16					10	2		8
FALSE	High	Master Protein	A0A088AU96	Macro domain-containing protein OS=Apis mellifera OX=7460 GN=LOC408589 PE=4 SV=1		0	FALSE	33.927	38	7	26	7	270	30.4	8.75	4.24	0				17.02					9.42				0	12.41		2.74	2.53		2	1				6					5
FALSE	High	Master Protein	O18330	Major royal jelly protein 1 OS=Apis mellifera OX=7460 GN=MRJP1 PE=1 SV=1		0	FALSE	26.841	18	6	6	6	432	48.9	5.34									12.03																				6
FALSE	High	Master Protein	A0A087ZUK9	Malate dehydrogenase OS=Apis mellifera OX=7460 GN=LOC408950 PE=3 SV=1		0	FALSE	160.23	75	20	370	20	338	35.8	9.29	109.59	49.59	81.65	23.58	2.55	136.9	61.42	69.57	59.95		85.4	50.86	34.65	89.4	53.6	46.62	50.8	35.53	27.32	15.84	17	10	17	8	1	18	13	13	16		13	8	10	15
FALSE	High	Master Protein	A0A087ZYQ1	Malate dehydrogenase OS=Apis mellifera OX=7460 GN=LOC411014 PE=3 SV=1		0	FALSE	85.7	46	12	90	12	333	36.1	6.71	12.31	20.17	8.84	14.83	0	38.72	13.25	7.2	15.99	4.4	30.7	30.43		20.07	6.09	11.55	17.56		5.01	27.85	3	4	2	5	2	6	3	2	5	1	6	6		3
FALSE	High	Master Protein	A0A087ZPN7	Malectin domain-containing protein OS=Apis mellifera OX=7460 PE=4 SV=1		0	FALSE	5.923	5	1	1	1	287	32.7	5.17																		2.02
FALSE	High	Master Protein	A0A088AES7	Malic enzyme OS=Apis mellifera OX=7460 GN=Mdh PE=3 SV=1		0	FALSE	16.364	11	5	11	5	625	69.7	7.64	2.07					2.15	1.62				2.17	2.26		1.95	1.74	0				2.01	2					1	1				1	1		1
FALSE	High	Master Protein	A0A088ATR6	Malic enzyme OS=Apis mellifera OX=7460 PE=3 SV=1		0	FALSE	47.234	22	10	23	10	632	70.7	7.11		0				15.55					11.67					5.09		7.54	3.89	8.24		1				6					6
FALSE	High	Master Protein	A0A087ZXG9	MARVEL domain-containing protein OS=Apis mellifera OX=7460 GN=100577682 PE=4 SV=1		0	FALSE	11.562	29	3	10	3	168	19.2	9.17	2.71	2.43	2.51	0	2.95					0								2.62	0	0	1	1	1	1	1					1
FALSE	High	Master Protein	A0A087ZPM2	Mast cell degranulating peptide OS=Apis mellifera OX=7460 GN=Mcdp PE=4 SV=1		0	FALSE	10.69	18	1	63	1	50	5.8	9.77				0	0	0	0	0	3.65	13.46	0	0	0	0	0									1	1	1	1	1	1	1	1	1	1	1
FALSE	High	Master Protein	A0A088AFE8	Matrin-type domain-containing protein OS=Apis mellifera OX=7460 GN=SF3A3 PE=4 SV=1		0	FALSE	8.808	4	1	8	1	501	58.3	5.41	3.22					6.42		0		0	4.07			3.03							1					1		1		1	1			1
FALSE	High	Master Protein	A0A088A676	Maxi-like antifreeze protein OS=Apis mellifera OX=7460 GN=102654146 PE=2 SV=1		0	FALSE	31.826	29	6	14	6	364	37	6.64					27.25	0				9.39				0											6	1				3				1
FALSE	High	Master Protein	A0A088AW52	MCU domain-containing protein OS=Apis mellifera OX=7460 PE=4 SV=1		0	FALSE	7.584	5	1	4	1	339	39.2	7.01						2.69				2.49	3.23		3.89													1				1	1		1
FALSE	High	Master Protein	P01501	Melittin OS=Apis mellifera OX=7460 GN=MELT PE=1 SV=1		0	FALSE	82.225	23	3	275	3	70	7.6	4.72	12.92	30.97	0	59.56	44.61	18.03	5.18	10.07	32.93	324.34	22.89	26.26	41.02	49.61	19.82					13.66	2	2	1	2	2	2	1	2	2	3	2	2	2	2
FALSE	High	Master Protein	P0DPR9	Melittin-N OS=Apis cerana OX=7461 GN=MELT PE=1 SV=1		0	FALSE	27.487	21	2	25	2	70	7.6	4.72						33.09		11.42	24.95		2.9								3.96							2		2	2		1
FALSE	High	Master Protein	A0A088AII8	Methionine aminopeptidase 2 OS=Apis mellifera OX=7460 GN=Metap2 PE=3 SV=1		0	FALSE	19.598	20	5	7	5	474	52.5	5.99						2.02								2.23			3.62	4.63	2.41	2.64						1								1
FALSE	High	Master Protein	A0A088A6U6	MFS domain-containing protein OS=Apis mellifera OX=7460 GN=LOC410920 PE=4 SV=1		0	FALSE	5.95	2	1	15	1	508	56.2	8.21	2.36		2.39	2.29	2.13	2.23		2.26		2.41	4.94		4.14	4.63	4.15						1		1	1	1	1		1		1	1		1	1
FALSE	High	Master Protein	A0A088ABY6	MFS domain-containing protein OS=Apis mellifera OX=7460 GN=LOC413575 PE=3 SV=1		0.002	FALSE	3.687	2	1	1	1	538	58.4	6.55															1.62
FALSE	High	Master Protein	A0A088A8N0	MFS domain-containing protein OS=Apis mellifera OX=7460 GN=LOC724874 PE=3 SV=1		0	FALSE	41.318	13	5	13	5	514	57.9	8.72									2.63						23					4.75									1
FALSE	High	Master Protein	A0A088AUA9	MFS domain-containing protein OS=Apis mellifera OX=7460 PE=3 SV=1		0	FALSE	15.748	7	3	8	3	521	57.6	8.28							3.61	3.87		3.56	3.84		5.54	3.32				2.63									1	1		1	1		2	1
FALSE	High	Master Protein	A0A087ZQD7	MFS domain-containing protein OS=Apis mellifera OX=7460 PE=3 SV=1		0.001	FALSE	5.077	1	1	13	1	784	87.1	7.34	4.35	4.18				2.21	2.6	2.15		1.93	4.25		2.66	1.79	0						1	1				1	1	1		1	1		1	1
FALSE	High	Master Protein	A0A088A5U8	MFS domain-containing protein OS=Apis mellifera OX=7460 PE=4 SV=1		0	FALSE	6.806	2	1	8	1	798	86.5	5.78	3.62					3.59	2.78				3.27	2.53	0	3.11				2.98			1					1	1				1	1	1	1
FALSE	High	Master Protein	A0A088A4M6	MFS_1_like domain-containing protein OS=Apis mellifera OX=7460 GN=LOC410041 PE=4 SV=1		0	FALSE	42.595	9	5	31	5	710	79.3	6.83	10.12	5.42	2.49			11.27	6.98	11.39		0	6.19	3.65	7.1	3.33	3.21	1.7		2.06	2.03	2.08	3	1	1			3	1	3		1	2	2	2	1
FALSE	High	Master Protein	A0A088A9E6	MHD domain-containing protein OS=Apis mellifera OX=7460 GN=AP-50 PE=3 SV=1		0	FALSE	15.164	11	4	9	4	442	49.9	9.45						5.66					0		4.23	1.65					1.88	4.35						2					2		1	1
FALSE	High	Master Protein	A0A088AG05	MICOS complex subunit MIC13 OS=Apis mellifera OX=7460 GN=725253 PE=3 SV=1		0	FALSE	25.071	61	4	46	4	114	12.9	9.28	10.36	12.1	14	6.3	10.44	10.22	15.53	14.19	2.26	12.2	6.74	3.21	13.34		1.93						2	2	3	3	3	2	2	2	1	2	2	1	3
FALSE	High	Master Protein	A0A088ASI2	MICOS complex subunit MIC60 OS=Apis mellifera OX=7460 GN=LOC408548 PE=3 SV=1		0	FALSE	209.839	50	33	328	33	752	86.1	7.78	38.87	63.88	48.9	14.64	24.43	53.04	63.49	76.81	24.09	52.13	38.22	28.41	78.91	36.84	48.06	25.6	57.94	59.32	51.66	20.94	11	16	14	5	8	14	15	19	11	14	10	8	20	9
FALSE	High	Master Protein	A0A088A8C1	MICOS complex subunit OS=Apis mellifera OX=7460 GN=LOC552009 PE=4 SV=1		0	FALSE	92.491	53	11	168	11	245	27.5	8.38	36.8	34.58	39.61	14.01	19.37	27.09	28.06	40.56	6.99	24.81	17.71	13.12	36.31	26.29	31.18	19.49	26.14	15.82	18.66	2.3	8	5	8	3	5	7	6	9	5	8	3	3	7	5
FALSE	High	Master Protein	A0A088AIX7	MIF4G domain-containing protein OS=Apis mellifera OX=7460 PE=4 SV=1		0	FALSE	6.498	5	2	2	2	498	56	8.95								0			0																	1			1
FALSE	High	Master Protein	A0A088A4V0	Mitochondrial fission 1 protein OS=Apis mellifera OX=7460 GN=LOC551255 PE=3 SV=1		0	FALSE	16.924	33	3	11	3	150	17.1	7.84	6.26		2.37			6.51	6.24	6.65		2.44				3.15							2		1			2	2	2		1				1
FALSE	High	Master Protein	A0A088A218	Mitochondrial import inner membrane translocase subunit TIM44 OS=Apis mellifera OX=7460 GN=LOC412409 PE=3 SV=1		0	FALSE	43.944	29	10	61	10	456	52.2	8.44	15.86	13.1	10.43	4.92	4.06	9.73	12.21	6.94	6.82	2.49	8.35	11.66	6.02	6.33	3.15	2.58	18.41	2.22	4.24	3.99	3	3	4	2	2	3	3	2	3	1	2	3	2	1
FALSE	High	Master Protein	A0A088AJ70	Mitochondrial import inner membrane translocase subunit TIM50 OS=Apis mellifera OX=7460 GN=LOC408569 PE=3 SV=1		0	FALSE	25.712	25	6	36	6	387	45.5	6.81	0	3.09	2.92				1.99	2.37		2.25	8.93	0	5.49	4.45	2.14	5.32	2.81	5.67		5.01	1	1	1				1	2		2	3	2	4	2
FALSE	High	Master Protein	A0A088AN56	Mitochondrial pyruvate carrier OS=Apis mellifera OX=7460 GN=LOC411677 PE=3 SV=1		0	FALSE	13.682	26	1	8	1	103	12.1	9.8			3.58	0						0	0		4.61	2.75									1	1						1	1		1	1
FALSE	High	Master Protein	A0A087ZYD6	Mitogen-activated protein kinase OS=Apis mellifera OX=7460 PE=4 SV=1		0	FALSE	6.775	5	1	3	1	388	44.5	6.06						2.05					2.63						4.57									1					1
FALSE	High	Master Protein	A0A087ZTA5	ML domain-containing protein OS=Apis mellifera OX=7460 GN=LOC724386 PE=4 SV=1		0.001	FALSE	5.257	16	2	3	2	148	16.1	7.62																			1.83	2.87
FALSE	High	Master Protein	A0A088A045	ML domain-containing protein OS=Apis mellifera OX=7460 PE=4 SV=1		0	FALSE	18.641	41	3	24	3	154	16.8	6.51	3.99			0		4.42			0		0			2.96		6.97	3.66			3.23	1			1		1			1		1			2
FALSE	High	Master Protein	A0A088ASG4	Molybdopterin molybdenumtransferase OS=Apis mellifera OX=7460 PE=3 SV=1		0	FALSE	6.065	5	2	2	2	510	55.8	8.28		4.03																				2
FALSE	High	Master Protein	A0A088AV56	MOSC domain-containing protein OS=Apis mellifera OX=7460 GN=LOC724919 PE=4 SV=1		0	FALSE	14.971	11	4	7	4	343	38.8	9.19															4.29	2.44		0	2.59	2.92
FALSE	High	Master Protein	A0A088AGS6	MPN domain-containing protein OS=Apis mellifera OX=7460 GN=LOC408413 PE=4 SV=1		0	FALSE	77.176	43	8	62	8	320	36.4	6.48	19.19	4.72	6.29	6.28	3.92	21.03	12.76	8.84	4.16	8.57	31.67	13.13	8.82	20.93	7.29	5.83	17.87	14.38	11.56		4	1	2	1	1	4	2	2	1	1	5	1	1	4
FALSE	High	Master Protein	A0A088A3I1	MPN domain-containing protein OS=Apis mellifera OX=7460 GN=LOC551620 PE=4 SV=1		0	FALSE	25.793	4	6	14	6	2374	277	8.88						5.43		4.66		0	5.63	2.05		2.37												2		5		1	2	1		1
FALSE	High	Master Protein	A0A088ATF1	MPN domain-containing protein OS=Apis mellifera OX=7460 GN=LOC552372 PE=4 SV=1		0.002	FALSE	4.289	13	2	3	2	207	23.5	6.15		2.13	0					2.57														1	1					1
FALSE	High	Master Protein	A0A087ZR05	MPN domain-containing protein OS=Apis mellifera OX=7460 GN=Rpn11 PE=4 SV=1		0	FALSE	50.543	50	9	62	9	311	34.6	6.29	21.26	12.7	4.68	2.06	4.43	19.26	7.73	7.38	3.03	6.12	30.29	6.03	6.35	10.95	5.75	8.75	6.05	3.26	2.98		6	4	2	1	2	6	2	2	2	2	9	2	3	4
FALSE	High	Master Protein	A0A088ABL8	MPN domain-containing protein OS=Apis mellifera OX=7460 PE=4 SV=1		0	FALSE	7.041	3	1	1	1	467	53.6	7.23											2.34																				1
FALSE	High	Master Protein	A0A088A8N1	MRP-S23 domain-containing protein OS=Apis mellifera OX=7460 PE=4 SV=1		0	FALSE	6.23	12	1	4	1	144	17.2	9.22	2.72	2.78					3.2								2.45						1	1					1
FALSE	High	Master Protein	A0A088A3M3	MRP-S28 domain-containing protein OS=Apis mellifera OX=7460 GN=mRpS35 PE=4 SV=1		0	FALSE	12.481	12	3	7	3	323	37.8	9.32		2.35				0					3.54		2.39		2.06				2.74			1				1					1		1
FALSE	High	Master Protein	A0A087ZQD5	MSP domain-containing protein OS=Apis mellifera OX=7460 GN=Vapa PE=4 SV=1		0	FALSE	83.852	53	12	279	12	249	28.1	7.84	44.25	32.89	32.53	11.46	10.44	40.09	36.76	40.21	10.96	33.93	44.36	35.42	49.35	47.93	19.87	31.77	36.18	35.17	28.22	6.56	8	7	8	4	5	9	7	9	7	8	8	8	8	10
FALSE	High	Master Protein	A0A088A1I8	Multifunctional fusion protein OS=Apis mellifera OX=7460 GN=LOC551113 PE=3 SV=1		0	FALSE	143.646	51	24	223	24	567	63.5	8.32	53.18	9.64	22.71			80.29	23.75	18.44			59.89	26.32	12.25	46.25	16.2	42.43	20.69	22.03	21.05	17.32	14	4	9			21	10	9			19	10	10	15
FALSE	High	Master Protein	A0A080UXV1	Murein-lipoprotein OS=Serratia marcescens OX=615 GN=lpp PE=4 SV=1		0	FALSE	5.95	18	1	3	1	78	8.3	8.84						3.58			2.27					3.71												1			1					1
FALSE	High	Master Protein	A0A088AJT3	Myb_DNA-bind_5 domain-containing protein OS=Apis mellifera OX=7460 PE=4 SV=1		0	FALSE	32.83	8	2	20	2	439	50.8	8.29	7.83	3.41				11.31	3.64	3.74	11.87							3.15	20.8	2.81			2	1				2	1	1	2
FALSE	High	Master Protein	A0A088AJE3	Myosin motor domain-containing protein OS=Apis mellifera OX=7460 PE=3 SV=1		0	FALSE	3205.39	68	207	18030	207	1967	226.4	5.55	3139.17	3051.92	2936.41	1852.32	1455.89	3058.2	2373.68	3087.58	1760.94	2654.63	2339.21	2145.26	2755.16	2476.38	2180.56	4026.91	2740.52	4839.94	5833.74	5399.64	150	145	154	153	143	155	148	155	152	153	136	131	143	144
FALSE	High	Master Protein	A0A088AGS8	Myosin motor domain-containing protein OS=Apis mellifera OX=7460 PE=3 SV=1		0	FALSE	12.471	2	2	3	2	1582	183.1	8.69		3.08					2.44											1.67				1					1
FALSE	High	Master Protein	A0A088AVZ2	Myosin_tail_1 domain-containing protein OS=Apis mellifera OX=7460 PE=4 SV=1		0	FALSE	24.887	5	4	15	3	942	107.9	5.3	1.61	1.89	1.72	1.49	1.31	2.02	1.87				1.68		2.07					1.7	2.18	8.93	1	1	1	1	1	1	1				1		1
FALSE	High	Master Protein	A0A087ZW20	Myosin_tail_1 domain-containing protein OS=Apis mellifera OX=7460 PE=4 SV=1		0	FALSE	588.268	50	43	1745	43	639	74.5	7.23	349.72	303.37	228.1	252.16	211.37	334.85	246.82	249.9	239.26	257.61	258.21	162.81	260.05	264.07	218.37	551.03	235.53	309.61	702.61	690.2	31	27	23	24	24	33	29	27	27	27	24	22	27	26
FALSE	High	Master Protein	A0A087ZW19	Myosin_tail_1 domain-containing protein OS=Apis mellifera OX=7460 PE=4 SV=1		0	FALSE	700.435	67	56	2755	56	541	63.5	5.36	577.73	520.56	393.59	344.27	299.38	525.79	418.56	347.11	379.39	362.32	418.4	285.28	410.56	429.57	309.75	1002.82	504.91	412.67	516.61	700.42	38	38	36	39	38	37	36	36	39	37	37	31	36	37
FALSE	High	Master Protein	A0A088ABQ1	Myosin-VI_CBD domain-containing protein OS=Apis mellifera OX=7460 PE=4 SV=1		0.003	FALSE	3.481	6	1	10	1	201	23.6	9.28		0				0	0	0		0	0	0		0				0				1				1	1	1		1	1	1		1
FALSE	High	Master Protein	A0A088AUC4	NAC-A/B domain-containing protein OS=Apis mellifera OX=7460 GN=LOC551157 PE=4 SV=1		0	FALSE	33.848	31	5	42	5	214	22.7	4.81	5.22	5.6	5.38			10.25	14.73	9.37	2.01	4.85	11.7	2.43	4.97	5.25	2.63	3.86	13.03	3.4			2	3	2			4	5	4	2	2	4	1	2	2
FALSE	High	Master Protein	A0A0B4J2M4	N-acetylglucosamine-6-phosphate deacetylase OS=Apis mellifera OX=7460 PE=3 SV=1		0	FALSE	7.246	4	1	1	1	405	44.5	7.69											3.1																				1
FALSE	High	Master Protein	A0A088A0I0	NAD(P)-bd_dom domain-containing protein OS=Apis mellifera OX=7460 GN=LOC412445 PE=4 SV=1		0	FALSE	37.64	42	5	31	5	201	22.2	8.25	6.98	3.11	5.46	6.26	3.08	16.61	7.69		0		13.17	8.16	3.99	13.45	3.41			3.35	8.46	6.98	2	1	2	2	1	3	2		1		3	2	1	3
FALSE	High	Master Protein	A0A088A9V8	NAD(P)-bd_dom domain-containing protein OS=Apis mellifera OX=7460 PE=3 SV=1		0	FALSE	8.971	7	2	2	2	356	40.3	6.86											2.29							2.39													1
FALSE	High	Master Protein	A0A087ZRH1	NAD_Gly3P_dh_N domain-containing protein OS=Apis mellifera OX=7460 PE=4 SV=1		0	FALSE	6.699	27	2	6	2	78	8.8	9.16						3.13		2.91			3.6			3.15						0						1		1			1			1
FALSE	High	Master Protein	A0A087ZP22	NADH dehydrogenase [ubiquinone] 1 alpha subcomplex subunit 10, mitochondrial OS=Apis mellifera OX=7460 GN=Ndufa10 PE=3 SV=1		0	FALSE	118.223	57	21	181	21	415	49.2	7.11	27.38	15.85	23.42	12.53	10.88	34.5	12.72	25.86	8.51	27.26	21.59	16.09	24.25	18.01	29.45	22.51	13.4	9.43	7.93	20.01	11	5	7	5	4	13	6	10	7	10	7	6	9	7
FALSE	High	Master Protein	A0A087ZQU2	NADH dehydrogenase [ubiquinone] 1 alpha subcomplex subunit 8 OS=Apis mellifera OX=7460 GN=Ndufa8 PE=3 SV=1		0	FALSE	24.72	40	5	56	5	174	20.2	8.05	2.75	2.34	4.7			10.44	12.14	11.68	6.86	11.43	5.83	8.76	11.46	8.22	5.44		0	0		4.95	1	1	3			4	3	4	4	4	2	4	4	3
FALSE	High	Master Protein	A0A088A1P8	NADH dehydrogenase [ubiquinone] flavoprotein 1, mitochondrial OS=Apis mellifera OX=7460 PE=3 SV=1		0	FALSE	111.854	54	16	226	16	469	51.5	8.34	33.67	24.08	41.86	12.38	18.88	54.74	52.9	58.44	14.74	42.05	41.19	32.38	41.19	36.48	30.24	19.75	9.85	12.51	12.86	10.83	8	7	11	6	7	12	14	12	6	11	11	9	12	10
FALSE	High	Master Protein	A0A088AB11	NADH-cytochrome b5 reductase OS=Apis mellifera OX=7460 GN=LOC413189 PE=3 SV=1		0	FALSE	133.874	59	17	323	17	308	34.6	8.9	52.76	66.32	52.27	15.99	36.51	64.43	67.88	65.75	9.88	59.39	73.09	48.4	59.51	57.74	59.08	35.25	8.52	25.4	18	26.21	10	10	9	7	9	12	10	11	6	9	10	7	8	8
FALSE	High	Master Protein	A0A060B9T4	NADH-ubiquinone oxidoreductase chain 1 OS=Apis mellifera scutellata OX=212527 GN=ND1 PE=3 SV=1		0	FALSE	11.025	5	1	7	1	305	36.7	6.54	2.9	3.01	2.45		2.43		6.04							1.82							1	1	1		1		1							1
FALSE	High	Master Protein	A0A0B5HAU7	NADH-ubiquinone oxidoreductase chain 3 OS=Apis mellifera syriaca OX=279977 GN=ND3 PE=3 SV=1		0	FALSE	10.391	11	1	32	1	117	14	8.1	5.29	5.13	6.79	2.26	2.61	5.77	0	4.75	0	8.27	2.62	7.52	6.95	4.54	4.99	2.32					1	1	1	1	1	1	1	1	1	1	1	1	1	1
FALSE	High	Master Protein	A0A088AJJ2	NADPH--cytochrome P450 reductase OS=Apis mellifera OX=7460 PE=4 SV=1		0	FALSE	127.93	45	19	214	19	523	60.3	7.05	26.37	51	27.18	2.62	1.82	44.89	39.53	77.57	9.18	17.14	52.5	45.44	31.91	21.33	2.69	18.67	14.22	33.29	10.15	16.45	8	9	7	3	2	11	11	16	4	6	9	9	11	6
FALSE	High	Master Protein	A0A088AD09	Ncstrn_small domain-containing protein OS=Apis mellifera OX=7460 GN=nct PE=4 SV=1		0.001	FALSE	4.717	3	1	3	1	642	72.1	6.04	0	2.74	0																		1	1	1
FALSE	High	Master Protein	A0A087ZYD4	Nicalin OS=Apis mellifera OX=7460 GN=Ncln PE=3 SV=1		0	FALSE	8.188	4	2	12	2	555	62	6.65		1.83	4.16			2.09	2.4	2.39		1.85		2.53	2.39	2.38	2.3			2.27				1	2			1	1	1		1		1	1	1
FALSE	High	Master Protein	A0A088ANS0	Nicotinamide-nucleotide adenylyltransferase OS=Apis mellifera OX=7460 PE=3 SV=1		0	FALSE	7.539	9	2	3	2	348	38.8	6.19						2.68			0		2.03															1			1		1
FALSE	High	Master Protein	A0A087ZZA0	Nipped-B protein OS=Apis mellifera OX=7460 PE=3 SV=1		0.002	FALSE	4.306	1	1	1	1	2007	227.6	6.96						1.87																				1
FALSE	High	Master Protein	A0A087ZWA0	Non-specific serine/threonine protein kinase OS=Apis mellifera OX=7460 GN=Akt1 PE=4 SV=1		0	FALSE	7.455	7	2	2	2	544	60.8	6.55												0				2.33																1
FALSE	High	Master Protein	A0A088ABF9	Non-specific serine/threonine protein kinase OS=Apis mellifera OX=7460 GN=Pak PE=4 SV=1		0	FALSE	9.566	6	2	3	2	586	64.6	7.01	2.82					3.55					0										1					1					1
FALSE	High	Master Protein	A0A087ZZZ5	Nop domain-containing protein OS=Apis mellifera OX=7460 GN=LOC413935 PE=4 SV=1		0	FALSE	36.921	14	6	46	6	578	65.2	8.13	9.8	4.83	1.7			17.42	5.6	9.1		7.07	10.47	2.5	5.34	7.89	1.71	2.92	0			2.29	3	2	1			4	2	3		2	3	1	2	4
FALSE	High	Master Protein	A0A088AQN0	Nop domain-containing protein OS=Apis mellifera OX=7460 PE=4 SV=1		0	FALSE	38.292	29	8	29	8	468	52.1	9.36	2.18	5.58			2.22	12.25	3.54	4.36		4.86	5.6	0	2.79	4.75	0		5.29	1.91			1	3			1	4	1	3		2	2	2	1	3
FALSE	High	Master Protein	A0A088AC14	NRF domain-containing protein OS=Apis mellifera OX=7460 GN=LOC410736 PE=4 SV=1		0	FALSE	6.424	1	2	9	2	1738	198.9	5.17		2.4				0	0	2.23					2.19	0		2.29			0	2.31		1				1	1	1					1	1
FALSE	High	Master Protein	A0A088ACB7	NRF domain-containing protein OS=Apis mellifera OX=7460 GN=LOC411564 PE=4 SV=1		0	FALSE	87.62	21	15	173	15	711	82.4	8.19	16.23	49.46	25.64	6.94	4.37	14.42	39.27	50.79	2.42	22.51	26.76	30.85	52.78	24.68	10.77	1.72	26.41	17.47	2.47	2.64	4	8	6	4	4	6	8	9	1	4	8	6	10	7
FALSE	High	Master Protein	A0A088A092	NRF domain-containing protein OS=Apis mellifera OX=7460 PE=4 SV=1		0	FALSE	35.349	14	6	31	6	637	73.3	8.85	2.29	6.07				5.57	7.05	7.02		2.34	11.82		2.56	1.75	0		16.39	0			1	3				2	4	3		2	4		2	1
FALSE	High	Master Protein	A0A088A0Q7	Nsp1_C domain-containing protein OS=Apis mellifera OX=7460 PE=4 SV=1		0.002	FALSE	4.059	2	1	1	1	464	48.8	4.87																				2.27
FALSE	High	Master Protein	A0A088ACJ3	NTF2 domain-containing protein OS=Apis mellifera OX=7460 GN=LOC409406 PE=4 SV=1		0	FALSE	21.072	17	1	25	1	130	14.9	5.78	11.4	4.25		10.44	3.31	12.52	3.69	2.46	8.21		3.57	3.96	3.52	11.84	3.44		4.25				1	1		1	1	1	1	1	1		1	1	1	1
FALSE	High	Master Protein	C5C7I0	NTP pyrophosphohydrolase OS=Micrococcus luteus (strain ATCC 4698 / DSM 20030 / JCM 1464 / NBRC 3333 / NCIMB 9278 / NCTC 2665 / VKM Ac-2230) OX=465515 GN=Mlut_22000 PE=4 SV=1		0.001	FALSE	4.962	7	1	52	1	156	16.4	6.01	5.7	1.74	7.36	9.48	9.51	5.53	3.67	1.67	1.63	6.4			1.95	4.3	4.69						1	1	1	1	1	1	1	1	1	1			1	1
FALSE	High	Master Protein	A0A087ZP24	NTP_transferase domain-containing protein OS=Apis mellifera OX=7460 GN=eIF2B-gamma PE=4 SV=1		0.001	FALSE	4.757	3	1	1	1	457	51.8	6.93						2.35																				1
FALSE	High	Master Protein	A0A087ZXL9	NTP_transferase domain-containing protein OS=Apis mellifera OX=7460 GN=LOC413435 PE=4 SV=1		0	FALSE	25.876	17	6	24	6	420	46.3	8.22	1.85	3.57	1.65	5.46		4.11	2.22	11.85			2.06	1.9	4.09	3.98	0	0		2.23	2.23		1	1	1	3		1	1	3			1	1	1	1
FALSE	High	Master Protein	A0A088A202	NTP_transferase domain-containing protein OS=Apis mellifera OX=7460 PE=4 SV=1		0	FALSE	30.923	20	7	19	7	359	39.8	6.2	3.23					5.62					16.87			4.7		7.95		8.03		2.09	1					2					6			2
FALSE	High	Master Protein	A0A088A7R5	Nuclear pore complex protein OS=Apis mellifera OX=7460 GN=Nup107 PE=3 SV=1		0	FALSE	9.153	4	4	4	4	918	106.9	5.71	1.73															0	1.95	2.11			1
FALSE	High	Master Protein	A0A088A1B8	Nuclear pore protein OS=Apis mellifera OX=7460 GN=LOC410343 PE=3 SV=1		0	FALSE	22.827	10	5	12	5	824	93.8	6.1	2.86	2.49	0	0	2.01		1.71				8.82		4.48								1	1	1	1	2		1				3		2
FALSE	High	Master Protein	A0A088A7S0	Nucleoplasmin domain-containing protein OS=Apis mellifera OX=7460 GN=102655896 PE=4 SV=1		0	FALSE	6.929	18	2	11	2	171	18.8	4.75		2.85	2.15			3.04		2.7			2.73	2.84					0	2.83	2.32	5.5		1	1			1		1			1	1
FALSE	High	Master Protein	A0A088ATV8	Nucleoside diphosphate kinase OS=Apis mellifera OX=7460 PE=3 SV=1		0	FALSE	51.328	66	10	68	10	154	17.6	7.33	10.9	9.57	4.55	2.56		23.48	9.05	10.13	11.05	2.3	9.48	9.56	5.96	9.01	6.56	3.07		8.67	0	15.28	3	3	3	2		7	4	4	5	1	4	3	3	4
FALSE	High	Master Protein	A0A088A6N0	Nudix hydrolase domain-containing protein OS=Apis mellifera OX=7460 GN=mRpL46 PE=4 SV=1		0	FALSE	11.478	4	2	11	2	269	31.1	8.59	0	3.06				2.41	2.95	2.61		2.55							2.84		0		1	1				2	2	1		1
FALSE	High	Master Protein	A0A088ASQ1	Obg-like ATPase 1 OS=Apis mellifera OX=7460 GN=LOC413266 PE=3 SV=1		0	FALSE	73.219	45	15	55	15	397	44.6	7.78	13.97	4.27	3.06	4.6	4.79	31.98		2.44	7.2		18.45	7.16	6.04	7.22		1.95		19.08	10.72		3	1	1	2	2	9		1	4		6	1	2	3
FALSE	High	Master Protein	A0A087ZSV5	OBG-type G domain-containing protein OS=Apis mellifera OX=7460 GN=LOC411280 PE=4 SV=1		0	FALSE	9.731	8	2	4	2	367	41	8.87											1.95					3			2.29												1
FALSE	High	Master Protein	A0A088AQW7	OBG-type G domain-containing protein OS=Apis mellifera OX=7460 GN=LOC552085 PE=4 SV=1		0.002	FALSE	3.712	3	1	1	1	363	40.8	8.48																2.49
FALSE	High	Master Protein	A0A088A4L3	OBP18 OS=Apis mellifera OX=7460 PE=4 SV=1		0	FALSE	8.213	17	2	2	2	149	16.4	4.84						0				2.66																1				1
FALSE	High	Master Protein	A0A088A3J5	OCIA domain-containing protein OS=Apis mellifera OX=7460 GN=asrij PE=4 SV=1		0	FALSE	17.43	25	3	35	3	233	27.2	5.12	8.37	5.64	2.23		2.25	8.53	2.72	8.18		2.43	4.78	5.14	6.94	2.5	0		2.7				2	1	1		1	2	1	2		2	1	1	1	1
FALSE	High	Master Protein	A0A088AW16	Oligosaccharyltransferase complex subunit OS=Apis mellifera OX=7460 PE=3 SV=1		0	FALSE	8.002	11	1	13	1	110	13	9.23	2.63	2.52	4.89		2.08	3.04	3.57	2.83		2.72	2.9		3.08	2.68	2.67						1	1	1		1	1	1	1		1	1		1	1
FALSE	High	Master Protein	H9KQJ7	Omega-conotoxin-like protein 1 OS=Apis mellifera OX=7460 PE=2 SV=1		0	FALSE	8.693	31	1	2	1	74	8.3	8.4										6.53																				1
FALSE	High	Master Protein	A0A0B4J2P4	OMPdecase domain-containing protein OS=Apis mellifera OX=7460 PE=3 SV=1		0.003	FALSE	3.431	4	1	4	1	468	52.2	8.63	0					2.09	0														1					1	1
FALSE	High	Master Protein	A0A087ZQT1	OTU domain-containing protein OS=Apis mellifera OX=7460 GN=LOC552263 PE=4 SV=1		0.003	FALSE	3.471	3	1	1	1	310	34.5	5.34																1.66
FALSE	High	Master Protein	A0A088A9V1	Oxidored_q6 domain-containing protein OS=Apis mellifera OX=7460 GN=Ndufs7 PE=3 SV=1		0	FALSE	59.973	39	8	136	8	223	24.9	9.31	13.93	19.28	28.38	7.01	11.36	22.57	22.14	24.09	5.64	23.52	17.56	21.68	25.34	13.43	14.17	24.02	11.55	3.86	15.03	23.09	3	3	6	3	3	4	4	5	1	5	4	5	5	3
FALSE	High	Master Protein	A0A088A6G0	Oxysterol-binding protein OS=Apis mellifera OX=7460 PE=3 SV=1		0	FALSE	6.361	3	2	14	2	1034	116.3	7.4		0	0			0	4.58	2.88		0	0	0	0	0								1	1			1	2	2		1	1	1	1	1
FALSE	High	Master Protein	A0A088AUS5	Oxysterol-binding protein OS=Apis mellifera OX=7460 PE=3 SV=1		0.002	FALSE	3.581	1	1	1	1	708	80.6	6.61						2.25																				1
FALSE	High	Master Protein	A0A088ATI3	PABS domain-containing protein OS=Apis mellifera OX=7460 GN=LOC410080 PE=4 SV=1		0	FALSE	44.031	30	8	23	8	366	41.2	5.07	7.42					11.6		3.01			11.57			6.89		2.74	10.66		6.7	5.39	2					2		1			2			3
FALSE	High	Master Protein	A0A088AEL4	PABS domain-containing protein OS=Apis mellifera OX=7460 GN=SpdS PE=3 SV=1		0.002	FALSE	4.181	5	2	3	2	293	32.6	6.16																			1.66	0
FALSE	High	Master Protein	A0A088AL15	ParB domain-containing protein OS=Apis mellifera OX=7460 PE=3 SV=1		0	FALSE	10.474	5	1	21	1	426	47.3	9.2	2.6		0	0		5.55	5.62	2.49		2.22	0	2.15	2.28	0							1		1	1		1	1	1		1	1	1	1	1
FALSE	High	Master Protein	A0A088AQD2	PCI domain-containing protein OS=Apis mellifera OX=7460 GN=411843 PE=4 SV=1		0.004	FALSE	3.132	5	1	1	1	282	30.6	5.99											3.04																				1
FALSE	High	Master Protein	A0A088AST3	PCI domain-containing protein OS=Apis mellifera OX=7460 GN=LOC408397 PE=4 SV=1		0	FALSE	72.397	36	11	47	11	423	47.4	6.48	11.02	18.39	2.83		3.27	16.31	12.13	6.43		2.34	23.17	14.22	14.83	13.04		2.03	4.57	8.2	6.66		3	4	2		1	4	4	2		1	6	3	4	3
FALSE	High	Master Protein	A0A088AJ83	PCI domain-containing protein OS=Apis mellifera OX=7460 GN=LOC409062 PE=4 SV=1		0	FALSE	13.972	13	4	6	4	444	51.5	5.82	2.08					0					0					0	3.09				1					1					2
FALSE	High	Master Protein	A0A088AUX6	PCI domain-containing protein OS=Apis mellifera OX=7460 GN=LOC552319 PE=4 SV=1		0	FALSE	29.611	20	6	17	6	389	45.6	6.01	5.84					7.75	5.43				10.57	6.58		2.86	0	3.1	2.2	2.33			2					3	2				3	1		1
FALSE	High	Master Protein	A0A088A0Z2	PCI domain-containing protein OS=Apis mellifera OX=7460 GN=Rpn12 PE=4 SV=1		0	FALSE	15.292	17	3	11	3	266	30.4	5.07	4.23					7.35	4.52	4.7		3.57						6.05		2.77	3.75	2.94	1					2	1	1		1
FALSE	High	Master Protein	A0A088ASB8	PCI domain-containing protein OS=Apis mellifera OX=7460 GN=Rpn3 PE=4 SV=1		0	FALSE	74.393	33	14	72	14	495	56.9	8.28	8.55	20.27	2.85		0	26.52	18.32	17.99			28.07	8.32	2.15	7.33	3.06	1.84	11.7	12.52	0	10.72	4	6	1		1	6	6	5			8	3	2	4
FALSE	High	Master Protein	A0A088AD77	PCI domain-containing protein OS=Apis mellifera OX=7460 PE=4 SV=1		0	FALSE	11.588	7	2	9	2	411	47.2	5.54	2.34					3.69		2.23			6.3	2.7	2.44	2.85						2.08	1					1		1			1	1	1	1
FALSE	High	Master Protein	A0A088AM61	PCI domain-containing protein OS=Apis mellifera OX=7460 PE=4 SV=1		0	FALSE	70.097	32	10	109	10	455	52.2	6.98	15.99	25.79			3.46	38.85	31.67	11.2	3.03	5.35	41.24	23.38	9.32	23.34	3.76	3.32	13.65	15.36	4.47	7.1	4	5			1	7	7	5	1	4	7	4	3	6
FALSE	High	Master Protein	A0A088AD16	PCI domain-containing protein OS=Apis mellifera OX=7460 PE=4 SV=1		0	FALSE	44.059	29	11	45	11	373	42.3	6.71	2.81	3.11		2.5	2.05	7.69	5.23	2.88			8.25	4.96	3.13	12.43	2.82	5.7	4.67	15.5	2.11	6.58	1	1		1	1	2	2	2			3	1	1	5
FALSE	High	Master Protein	A0A087ZT54	PDE4_UCR domain-containing protein OS=Apis mellifera OX=7460 PE=4 SV=1		0	FALSE	7.169	11	1	2	1	177	18.9	8.32						3.7								0												1								1
FALSE	High	Master Protein	A0A087ZXR8	PDZ domain-containing protein OS=Apis mellifera OX=7460 GN=100578519 PE=4 SV=1		0	FALSE	19.824	5	4	6	4	1116	126.5	5.86											2.31		4.2	3.98				5.68													1		1	1
FALSE	High	Master Protein	A0A088AUT1	PDZ domain-containing protein OS=Apis mellifera OX=7460 GN=LOC413207 PE=4 SV=1		0	FALSE	35.264	30	5	24	5	260	28.5	6.11	4.76	3.99				11.13	4.4		5.34		8.3	2.7		4.34		6.11	9.88	7.55	0	10.48	1	1				3	1		2		2	1		1
FALSE	High	Master Protein	A0A088AHV6	PDZ domain-containing protein OS=Apis mellifera OX=7460 PE=4 SV=1		0	FALSE	75.855	63	8	139	8	168	18.8	9.44	44.58	15.77	7.43	7.8	6.02	44.15	12.05	26.7	19.04	31.22	36.26	12	26.97	30.03	9.25	33.36	7.9	20.02	14.08	4.48	6	5	4	3	3	6	4	5	4	5	5	4	4	4
FALSE	High	Master Protein	A0A087ZY53	Peptidase A1 domain-containing protein OS=Apis mellifera OX=7460 GN=cathD PE=3 SV=1		0	FALSE	127.163	59	16	215	16	385	42.2	6.32	63.58	28.77	45.75	27.04	33.11	68.85	35.48	45.48	11.34	9.03	53.52	30.11	38.7	36.08	42.15	12.87	11.33	3.21	5.64	18.58	8	6	8	6	8	9	7	8	5	3	9	7	7	8
FALSE	High	Master Protein	A0A088ALY6	Peptidase S1 domain-containing protein OS=Apis mellifera OX=7460 GN=100576326 PE=3 SV=1		0	FALSE	29.352	20	7	40	7	417	45.9	5.71	5.83	2.08	0		2.72	0	0	8.65	0	4.99	6.54	3.77	6.17	3.38	7.25	2.51	1.77	1.63		4.8	3	1	2		2	1	1	4	1	3	4	1	3	2
FALSE	High	Master Protein	A0A088A9M1	Peptidase S1 domain-containing protein OS=Apis mellifera OX=7460 GN=SP22 PE=3 SV=1		0	FALSE	8.895	12	3	7	3	259	28	8.81		3.95												2.13					2.48	4.29		2												1
FALSE	High	Master Protein	A0A088ADM5	Peptidase S1 domain-containing protein OS=Apis mellifera OX=7460 GN=SP3 PE=3 SV=1		0	FALSE	84.681	56	16	79	16	353	39.5	6.81	23.65		0	12.36	3.64	33.32	11.22	5.06	2.3	0	37.77	9.86	6.49	8.86	2.13		7.4	7.76		5.97	7		1	5	3	9	5	3	2	1	8	3	2	3
FALSE	High	Master Protein	A0A088AGZ8	Peptidase S1 domain-containing protein OS=Apis mellifera OX=7460 GN=SP36 PE=3 SV=1		0	FALSE	46.591	26	5	29	5	263	28.1	7.68		35.03	3.04			3.21			2.08					5.92	8.14					11.95		5	2			1			1					4
FALSE	High	Master Protein	A0A088AFN9	Peptidase S1 domain-containing protein OS=Apis mellifera OX=7460 GN=SPH55 PE=4 SV=1		0	FALSE	16.683	7	3	12	3	674	75.9	5.59	8.56	2.13	6.67	3.06	6.69				2.72										1.66		1	1	2	1	2				1
FALSE	High	Master Protein	A0A087ZN40	Peptidase S1 domain-containing protein OS=Apis mellifera OX=7460 PE=3 SV=1		0	FALSE	39.427	35	7	38	7	276	29.4	8.75		28.15	0			4.76			0					5.45	0	2.19			5.03	49.82		6	1			2			1					2
FALSE	High	Master Protein	A0A088A359	Peptidase S1 domain-containing protein OS=Apis mellifera OX=7460 PE=3 SV=1		0	FALSE	13.035	12	4	15	4	391	43.7	5.39	0	0				2.04	0				2.54	0	8.93	4.11	0			1.84			1	1				1	1				1	1	3	1
FALSE	High	Master Protein	A0A087ZWJ6	Peptidase S59 domain-containing protein OS=Apis mellifera OX=7460 GN=Nup98 PE=4 SV=1		0	FALSE	25.848	6	6	12	6	1818	198.8	6.81	8.06					7.35	2.37	2.69		2.07	3.56						0	1.79			3					2	1	1		1	1
FALSE	High	Master Protein	A0A088A6L1	Peptidase S72 domain-containing protein OS=Apis mellifera OX=7460 GN=100576978 PE=4 SV=1		0	FALSE	61.535	40	8	54	4	276	31.2	6.25	5.71	3.2	7.56	4.15	4.35	9.11	11.65	10.46	7.08	9.28	10.64	2.91	8.2	8.88	4.88	1.84	8.73	6.44	2.06		3	1	2	1	1	3	2	2	2	2	1	1	1	1
FALSE	High	Master Protein	A0A088ADK3	Peptidase_M24 domain-containing protein OS=Apis mellifera OX=7460 GN=LOC412221 PE=4 SV=1		0	FALSE	17.754	16	5	8	5	387	43.8	7.5						1.72					0					2.26		3.22	1.67	2.9						1					1
FALSE	High	Master Protein	A0A088AJR6	Peptidase_M28 domain-containing protein OS=Apis mellifera OX=7460 GN=LOC410149 PE=4 SV=1		0.004	FALSE	3.15	2	1	1	1	479	52.9	5.43																				2.37
FALSE	High	Master Protein	A0A088ATY2	Peptidase_M28 domain-containing protein OS=Apis mellifera OX=7460 GN=LOC411943 PE=4 SV=1		0	FALSE	7.633	8	2	2	2	348	40.3	6.76						2.39																				2
FALSE	High	Master Protein	A0A087ZW90	Peptidase_M3 domain-containing protein OS=Apis mellifera OX=7460 GN=LOC412154 PE=3 SV=1		0	FALSE	18.572	9	5	12	5	755	87.5	8.38			0			0					4.99	0	0	2.64		2.07							2			1					2	1	1	1
FALSE	High	Master Protein	A0A088AFK3	Peptide deformylase OS=Apis mellifera OX=7460 GN=102654737 PE=3 SV=1		0.002	FALSE	3.697	4	1	6	1	233	27.1	6.98		0				2.04	0	0						0						0		1				1	1	1						1
FALSE	High	Master Protein	A0A088A8D4	Peptidyl-prolyl cis-trans isomerase OS=Apis mellifera OX=7460 GN=LOC409890 PE=3 SV=1		0	FALSE	48.109	36	7	111	7	209	22.8	9.14	18.34	6.12	5.3	3.54	3.57	36.41	5.51	3.74	8.84		30.55	13.93		20.44	5.72	42.17	20.85	23.3	13.79	3.79	4	2	2	2	2	7	2	1	2		6	3		4
FALSE	High	Master Protein	A0A088AVK4	Peptidyl-prolyl cis-trans isomerase OS=Apis mellifera OX=7460 GN=LOC726409 PE=3 SV=1		0.001	FALSE	4.797	8	1	3	1	184	20.3	7.24	2.95					3.16												2.03			1					1
FALSE	High	Master Protein	A0A088A5R9	Peptidyl-prolyl cis-trans isomerase OS=Apis mellifera OX=7460 PE=3 SV=1		0	FALSE	35.282	42	6	27	6	184	20.1	8.68	9.11	2.82	2.34			17.34	4.89					2.98		3.63		10	21.11	6.85	2.17		3	1	1			5	2					1		1
FALSE	High	Master Protein	A0A088ABX3	Peptidylprolyl isomerase OS=Apis mellifera OX=7460 GN=FK506-bp1 PE=4 SV=1		0	FALSE	25.27	14	4	22	4	354	40.4	4.89	6.42	4.7	1.94		0	12.06	2.57				5.75	2.07	2.44	2.33		5.05		6.78	0		3	2	1		1	4	1				2	1	1	1
FALSE	High	Master Protein	A0A088A2S8	Peptidylprolyl isomerase OS=Apis mellifera OX=7460 GN=FK506-bp2 PE=4 SV=1		0	FALSE	15.901	29	2	6	2	109	11.8	7.99						5.41			2.27		9.19			2.71												1			1		2			1
FALSE	High	Master Protein	A0A087ZPR8	Peptidylprolyl isomerase OS=Apis mellifera OX=7460 GN=FKBP59 PE=4 SV=1		0	FALSE	21.74	16	5	7	5	459	51.5	5.58					1.75	7.24					4.15					2.58		2.93							1	2					2
FALSE	High	Master Protein	A0A088A5M5	Peptidylprolyl isomerase OS=Apis mellifera OX=7460 GN=LOC550701 PE=4 SV=1		0	FALSE	9.774	10	4	4	4	382	43.2	6.73						1.79					2.46								1.66	0						1					1
FALSE	High	Master Protein	A0A088AAR9	Peptidylprolyl isomerase OS=Apis mellifera OX=7460 PE=4 SV=1		0	FALSE	35.979	60	7	11	7	164	18.4	4.78	2.49					5.84					2.08						20.88				1					1					1
FALSE	High	Master Protein	A0A087ZYL4	Peroxiredoxin OS=Apis mellifera OX=7460 GN=Prx5 PE=3 SV=1		0	FALSE	50.933	46	5	69	5	185	20.2	8.84	14.9		2.18			31.37	3.94	5.86	8.47		25.55	10.81	3.83	23.93	5.45	25.55	12.59	9.57	6.65	3.65	3		1			5	2	2	2		4	3	1	3
FALSE	High	Master Protein	A0A088A9F5	Pex14_N domain-containing protein OS=Apis mellifera OX=7460 GN=LOC552256 PE=4 SV=1		0.002	FALSE	4.382	4	1	11	1	265	30	6.29		3.36					3.35	5.58			3.04		2.75	2.87	0	2.59		4.01				1					1	1			1		1	1
FALSE	High	Master Protein	A0A087ZS94	PfkB domain-containing protein OS=Apis mellifera OX=7460 GN=LOC408441 PE=4 SV=1		0	FALSE	16.514	15	3	8	3	345	38.5	5.82						5.52		0		0					0	2.03										2		1		1
FALSE	High	Master Protein	A0A088AFQ2	PH domain-containing protein OS=Apis mellifera OX=7460 GN=LOC408836 PE=4 SV=1		0	FALSE	80.179	19	10	81	10	713	81.1	6.8	22.96	23.89	8.38	10.96	13.87	22.13	20.64	4.8	2.74	9.29	24.93	5.88	12.12	24	6.37	3.24	11.49	6.74	9.87	6.34	4	4	2	3	3	3	5	1	1	3	5	2	1	5
FALSE	High	Master Protein	A0A087ZUN9	PH domain-containing protein OS=Apis mellifera OX=7460 PE=4 SV=1		0	FALSE	22.458	11	5	8	5	792	90	6.24		2.86					10.18	3.91									3.09			0		1					3	1
FALSE	High	Master Protein	A0A1C3HHM4	Phage virion morphogenesis family protein OS=Serratia marcescens OX=615 GN=PWN146_03254 PE=4 SV=1		0.01	FALSE	2.838	5	1	2	1	150	16.4	6.07															1.75					1.6
FALSE	High	Master Protein	A0A088A9W3	PHB domain-containing protein OS=Apis mellifera OX=7460 GN=Flo1 PE=3 SV=1		0	FALSE	26.229	18	7	28	7	429	47.5	5.55		1.89	2.33			2.71	5.3	7.84		2.63	5.3	2.32	5.69	7.54	4.22		1.64	5.67	0	3.07		1	1			1	1	2		2	1	1	2	2
FALSE	High	Master Protein	A0A088AJY9	PHB domain-containing protein OS=Apis mellifera OX=7460 GN=Flo2 PE=3 SV=1		0	FALSE	46.021	32	9	43	9	402	44	5.73	1.84	0	6.87			10.76	6.98	17.51		3.59	4.57	2.35	6.73	2.54	2.86	5.58		3.16	6.17	8.2	2	1	4			5	3	5		3	2	1	3	1
FALSE	High	Master Protein	A0A088AD80	PHB domain-containing protein OS=Apis mellifera OX=7460 GN=LOC551427 PE=4 SV=1		0	FALSE	9.791	6	2	3	2	324	37.2	6.33																	2.39	2.88		0
FALSE	High	Master Protein	A0A088AMB1	PHB domain-containing protein OS=Apis mellifera OX=7460 GN=LOC551944 PE=4 SV=1		0	FALSE	129.827	50	14	450	14	353	39.5	9.06	72.09	76.43	68.64	43.47	48.1	87.34	64.44	74.89	25.86	70.07	70.47	63.65	86.37	65.61	60.08	62.85	16.88	55.21	43.08	19.1	12	13	12	10	11	12	11	13	8	11	10	10	12	10
FALSE	High	Master Protein	A0A087ZYC8	PHB domain-containing protein OS=Apis mellifera OX=7460 PE=4 SV=1		0	FALSE	60.965	41	10	88	10	380	42.7	8.43	15.68	18.43	16.99		3.16	17.12	14.08	18.51	3.54	12.78	12.93	11.15	18.59	10.25	5.99	13.98		16.13	7.08	23.24	4	4	5		2	4	4	4	2	3	3	2	4	2
FALSE	High	Master Protein	A0A087ZN35	Phorbol-ester/DAG-type domain-containing protein OS=Apis mellifera OX=7460 PE=4 SV=1		0.006	FALSE	2.866	8	1	8	1	143	15.6	9.63	0				0		2.06			2.25	2.35	2.27		2.23		2.11					1				1		1			1	1	1		1
FALSE	High	Master Protein	A0A088AHV4	Phos_pyr_kin domain-containing protein OS=Apis mellifera OX=7460 GN=LOC552663 PE=4 SV=1		0	FALSE	29.668	27	6	21	6	296	33.3	6.55	0	1.76				12.88	2.27				9.98	4.6		1.99			5.59	6.49		5.59	1	1				4	1				2	2		1
FALSE	High	Master Protein	A0A088ASM4	Phosphate carrier OS=Apis mellifera OX=7460 GN=LOC413517 PE=2 SV=1		0	FALSE	104.485	43	19	451	19	354	39.1	9.1	54.35	55.79	64	37.17	47.2	44.38	31.45	74.48	16.22	57.4	29.78	34.34	57.33	40.4	43.51	40.66	7.28	42.15	45.38	23.51	13	14	12	14	14	13	10	15	5	14	10	9	14	12
FALSE	High	Master Protein	A0A088AAD6	Phosphatidylinositol-4,5-bisphosphate 4-phosphatase OS=Apis mellifera OX=7460 GN=LOC408301 PE=4 SV=1		0	FALSE	12.534	13	2	14	2	253	27.3	8.4	3.83	0					0	4.19		3.21	0	0	0	0				0			1	1					1	2		2	1	1	1	1
FALSE	High	Master Protein	A0A087ZT55	Phosphodiesterase OS=Apis mellifera OX=7460 GN=dnc PE=3 SV=1		0	FALSE	8.837	5	2	3	2	534	59.7	5.02						5.94						2.44														2						1
FALSE	High	Master Protein	A0A087ZNJ8	Phosphoglycerate kinase OS=Apis mellifera OX=7460 GN=Pgk PE=3 SV=1		0	FALSE	185.776	70	23	213	23	415	45	8.12	33.09	44.74	3.26	5.59		106.3	31.34	9.51	9.62		88.85	32.4	3.42	54.32	2	62.46	62.11	30.79	13.11	18.97	9	9	1	2		20	8	4	4		16	8	3	11
FALSE	High	Master Protein	A0A087ENY5	Phosphoglycerate kinase OS=Lactobacillus kunkeei OX=148814 GN=pgk PE=3 SV=1		0.002	FALSE	3.763	4	2	3	2	404	42.9	5.24												2.35				2.04		0														1
FALSE	High	Master Protein	A0A088A4K0	Phosphoglycerate mutase OS=Apis mellifera OX=7460 PE=3 SV=1		0	FALSE	125.523	61	17	172	17	312	35.3	9.35	17.78	22.77	12	32.04	3.11	53.49	18.47	7.99	62.23		33.98	38.67	12.71	17.22	8.34	31.13	10.97	10.55	17.2	43.64	4	6	5	8	1	12	6	3	13		7	9	5	5
FALSE	High	Master Protein	B7UUK1	Phospholipase A2 OS=Apis mellifera OX=7460 GN=pla2 PE=2 SV=1		0	FALSE	91.426	60	9	70	9	167	19	7.39				9.8	6.16	2.65			18.03	66.71				2.13	0				0	13.69				5	3	1			8	9				2
FALSE	High	Master Protein	A0A088AVA3	Phospholipid-transporting ATPase OS=Apis mellifera OX=7460 GN=LOC552074 PE=3 SV=1		0	FALSE	9.363	2	2	4	2	1205	136.3	6.32								2.03			2.79		2.37					2.95										1			1		1
FALSE	High	Master Protein	A0A087ZYS8	Phospholipid-transporting ATPase OS=Apis mellifera OX=7460 PE=3 SV=1		0	FALSE	7.279	2	2	3	2	1123	127.8	8.03								1.91		1.87										1.85								1		1
FALSE	High	Master Protein	A0A088A245	Phosphomannomutase OS=Apis mellifera OX=7460 GN=LOC550926 PE=3 SV=1		0	FALSE	11.012	16	3	5	3	262	30.4	5.95	0					2.01								0		3.93				0	1					1								1
FALSE	High	Master Protein	A0A088A6W8	Phosphotransferase OS=Apis mellifera OX=7460 PE=3 SV=1		0	FALSE	33.026	20	7	12	7	445	49.6	6.27						8.74			1.76		2.85	5.66								11.16						3			1		2	1
FALSE	High	Master Protein	A0A088AMP9	PID domain-containing protein OS=Apis mellifera OX=7460 GN=102656070 PE=4 SV=1		0	FALSE	26.174	15	6	30	6	558	60.6	9.77	2.19		1.96	1.81		7.67	5.65	6.29	0	6.02	4.71	1.95	2.18	2.17	1.65	2.15		0			2		1	1		4	2	2	1	3	2	2	2	2
FALSE	High	Master Protein	A0A087ZS23	PID domain-containing protein OS=Apis mellifera OX=7460 GN=ced-6 PE=4 SV=1		0	FALSE	34.119	17	7	31	7	459	51.1	6.7	7.81	2.92			4.39	5.43	9.63	3.27		5.05	4.99			2.37		2.36	6.64	6.08	3.42	3.78	2	1			3	2	4	2		2	2			1
FALSE	High	Master Protein	A0A088AMH9	PIPK domain-containing protein OS=Apis mellifera OX=7460 GN=LOC409276 PE=4 SV=1		0	FALSE	18.258	12	4	6	4	494	56.7	7.52						0					3.79						0			6.48						1					1
FALSE	High	Master Protein	A0A088ATI9	PKS_ER domain-containing protein OS=Apis mellifera OX=7460 GN=LOC408643 PE=4 SV=1		0	FALSE	99	44	11	161	11	401	44.2	6.15	58.82	12.79	8.16	21.76	10.95	48.21	14.13	7.08	12.43	5.76	52.45	21.39	4.91	25.42	3.48	7.93	10.48	10.67	17.51	10.81	9	4	5	8	6	10	4	2	6	3	9	4	2	6
FALSE	High	Master Protein	A0A088A347	PKS_ER domain-containing protein OS=Apis mellifera OX=7460 GN=LOC409207 PE=4 SV=1		0	FALSE	33.253	22	7	15	7	471	51.3	5.76	5.84	3.09				19.03					3.55	3.27			0	2.66		2.59	2.35		2	1				5					1	1
FALSE	High	Master Protein	A0A087ZU72	PKS_ER domain-containing protein OS=Apis mellifera OX=7460 PE=3 SV=1		0	FALSE	91.556	48	13	53	13	364	39.8	7.8	2.88		2.7			20.52	15.05	3.48			47.79	8.27		24.18		3.18	9.13	32.46		2.74	1		1			2	2	1			7	3		5
FALSE	High	Master Protein	A0A087ZXT8	PKS_ER domain-containing protein OS=Apis mellifera OX=7460 PE=4 SV=1		0	FALSE	60.284	40	8	54	8	342	38.1	9.04	17.65	6.84	8.79	0		22.54	19.78	10.76	4.68		17.54	8.67	11.84	17.56	8.56	5.05	2.85	2.8		0	3	2	3	1		5	6	3	2		5	2	3	5
FALSE	High	Master Protein	A0A088AE44	PLAC domain-containing protein OS=Apis mellifera OX=7460 GN=LOC409970 PE=4 SV=1		0.001	FALSE	5.541	3	2	11	2	629	70	7.23		0					0	0		0	0	0	0			0			0			1					1	2		2	1	1	1
FALSE	High	Master Protein	A0A088A2S7	PlsC domain-containing protein OS=Apis mellifera OX=7460 GN=LOC552089 PE=4 SV=1		0.001	FALSE	4.598	4	1	5	1	318	36.7	8.95	2.42	1.77	2.05					2.64			2.63										1	1	1					1			1
FALSE	High	Master Protein	A0A088AHM2	PlsC domain-containing protein OS=Apis mellifera OX=7460 GN=LOC552688 PE=4 SV=1		0	FALSE	10.85	10	3	8	3	376	44	8.87		2.74	0			2.35		2.81		2.59			4.56					1.82				1	1			1		1		1			2
FALSE	High	Master Protein	A0A088A890	PlsC domain-containing protein OS=Apis mellifera OX=7460 PE=3 SV=1		0	FALSE	20.925	11	5	11	5	661	76.4	9.23			7.32				4.91	3.84			3.85						2.92		1.93	2.55			4				2	1			1
FALSE	High	Master Protein	A0A088ALS3	PlsC domain-containing protein OS=Apis mellifera OX=7460 PE=4 SV=1		0	FALSE	26.65	32	5	18	5	273	31.6	9.55	3.05	3.47	2.29	0		9.57	3.34	3.14			3.29		4.91	2.31		3.27	3.45	9.67			1	1	1	1		3	1	1			1		2	1
FALSE	High	Master Protein	A0A087ZSU4	Plug_translocon domain-containing protein OS=Apis mellifera OX=7460 GN=Sec61alpha PE=3 SV=1		0	FALSE	29.468	17	6	42	6	476	52.4	8.38	9.42	8.26	10.47	0	1.95	4.62	10.17	7.94		2.78	6.15	5.37	4.74	5.95	1.81	1.68		9.08		2.61	3	3	4	1	1	1	2	2		2	2	2	2	2
FALSE	High	Master Protein	A0A087ZQX2	Poly [ADP-ribose] polymerase OS=Apis mellifera OX=7460 PE=4 SV=1		0	FALSE	6.441	7	2	3	2	381	43.5	8.46							2.54	0			1.62																1	1			1
FALSE	High	Master Protein	A0A088AHI2	POU domain protein OS=Apis mellifera OX=7460 GN=LOC410203 PE=3 SV=1		0	FALSE	8.654	4	1	2	1	460	49.3	8.19											4.07			3.04																	1			1
FALSE	High	Master Protein	A0A088AAV3	PPM-type phosphatase domain-containing protein OS=Apis mellifera OX=7460 GN=LOC551020 PE=3 SV=1		0.002	FALSE	4.236	5	1	3	1	329	36.9	6.61						2.28						0					0									1						1
FALSE	High	Master Protein	A0A088AUX7	PRA1 family protein OS=Apis mellifera OX=7460 GN=LOC410130 PE=3 SV=1		0	FALSE	16.284	16	3	81	3	196	22.4	9.22	19.03	15.52	12.4	7.61	8.02	19.81	18.76	15.93	2.34	9.63	17.26	2.16	13.19	16.97	7.27	1.63	18.81	0			3	3	3	2	2	3	3	3	1	3	3	1	3	3
FALSE	High	Master Protein	A0A088AR33	Pribosyltran domain-containing protein OS=Apis mellifera OX=7460 GN=Aprt PE=3 SV=1		0	FALSE	14.921	25	3	7	3	178	20	6.05		0	0			2.7	0				0						3.44					1	1			2	1				1
FALSE	High	Master Protein	A0A087ZTI8	Pribosyltran_N domain-containing protein OS=Apis mellifera OX=7460 GN=LOC551448 PE=4 SV=1		0	FALSE	11.06	10	3	6	3	370	40.5	8.27		1.65									2.77			2.72		2.68		2.84	2.1			1									1			1
FALSE	High	Master Protein	A0A087EQL3	Probable phosphoketolase OS=Lactobacillus kunkeei OX=148814 GN=JI66_01655 PE=3 SV=1		0	FALSE	49.912	20	10	14	10	796	90.1	5.14							2.29					42.2															1					10
FALSE	High	Master Protein	A0A087ZNT2	Profilin OS=Apis mellifera OX=7460 GN=PRF PE=3 SV=1		0	FALSE	56.53	73	6	80	6	126	13.8	5.92	9.7	11.22	2.29	2.59		38.51	11.56	3.09	5.75		34.37	10.71	2.22	16.64	2.84	24.93	9.71	9.98	2.95	19.27	3	3	1	1		4	3	1	3		5	3	1	5
FALSE	High	Master Protein	A0A088AGQ1	Prohibitin OS=Apis mellifera OX=7460 GN=LOC408412 PE=3 SV=1		0	FALSE	194.353	81	18	548	18	271	30	7.06	99.11	86.02	88.3	49.13	59.58	95.43	86.6	98.69	28.29	83.46	90.65	80.06	102.47	76.84	70.56	90.22	37.87	80.58	73.13	51.01	13	13	14	13	13	12	13	12	8	13	13	12	15	13
FALSE	High	Master Protein	F1DFM1	Projectin long variant (Fragment) OS=Apis mellifera OX=7460 GN=PEVK PE=2 SV=1		0	FALSE	111.087	37	16	154	1	482	55.3	9.45	33.3	26.71	0	1.84	0	36.8	45.1	13.45	6.03	9.78	40.35	13.5	25.53	16.97		13.04	55.33	20.15	4.75		10	7	1	1	1	8	10	4	5	4	10	5	7	7
FALSE	High	Master Protein	A0A088AW48	Proliferating cell nuclear antigen OS=Apis mellifera OX=7460 GN=mus209 PE=3 SV=1		0	FALSE	16.981	29	5	8	5	261	29.1	4.82						4.83					1.98					0		5.85								2					2
FALSE	High	Master Protein	A0A088A8H2	Proline dehydrogenase OS=Apis mellifera OX=7460 PE=3 SV=1		0	FALSE	143.772	57	20	168	20	516	59.6	8.69	28.33	17.76	31.39	7.64	1.63	48.24	27.8	45.44		5.66	28.87	28.27	60.69	23.26	29.53	25.09	7.72	21.25	22.13	35.73	8	6	8	3	2	10	10	13		4	7	8	13	7
FALSE	High	Master Protein	Q86MV4	Prophenoloxidase OS=Apis mellifera OX=7460 GN=PPO PE=2 SV=2		0	FALSE	103.106	38	19	105	19	693	80	6.76	7.7	4.02	4.07	6.29	6.01	36.93	3.75	7.83	30.64	3.21	25.75		10.38	9.84	14.42	3.78	25.43	3.29	0	3.92	4	2	2	5	4	11	1	3	14	1	9		5	3
FALSE	High	Master Protein	A0A088A859	Proteasome endopeptidase complex OS=Apis mellifera OX=7460 GN=Pros29 PE=3 SV=1		0	FALSE	21.73	11	4	17	4	622	70.8	6.24	4.41	4.32				5.19	4.04	3.63			6.56	3.91	3.72			3.03	2.74	2.51		5.39	2	2				1	1	1			2	2	1
FALSE	High	Master Protein	A0A088A379	Proteasome subunit alpha type OS=Apis mellifera OX=7460 GN=LOC410095 PE=3 SV=1		0	FALSE	46.13	34	8	36	8	249	28.1	8.46	0	6.07				15.95	12.12				4.49			1.93		1.92	12.04	7.35	5.28	6.52	1	4				4	3				3			2
FALSE	High	Master Protein	A0A088ATC7	Proteasome subunit alpha type OS=Apis mellifera OX=7460 GN=LOC552654 PE=3 SV=1		0	FALSE	35.651	35	9	21	9	276	30.9	6.18	1.91	1.66				7.85	5.47	0		0	4.37	1.75						8.61		12.98	1	1				3	2	1		1	2	1
FALSE	High	Master Protein	A0A087ZZN8	Proteasome subunit alpha type OS=Apis mellifera OX=7460 GN=Prosalpha5 PE=3 SV=1		0	FALSE	6.109	8	1	3	1	242	26.7	4.92																	2.97	3.42		3.67
FALSE	High	Master Protein	A0A088AP06	Proteasome subunit alpha type OS=Apis mellifera OX=7460 GN=Prosalpha7 PE=3 SV=1		0	FALSE	9.823	9	2	2	2	254	27.9	6.09																				5.38
FALSE	High	Master Protein	A0A088A1E9	Proteasome subunit beta OS=Apis mellifera OX=7460 GN=LOC408353 PE=3 SV=1		0	FALSE	8.824	10	2	4	2	277	30.3	7.42						4.65	3.74				4.56									2.13						1	1				1
FALSE	High	Master Protein	A0A087ZWB2	Proteasome subunit beta OS=Apis mellifera OX=7460 GN=LOC409978 PE=3 SV=1		0	FALSE	13.184	25	5	15	5	207	23.6	6.92	2.26	2.18	1.91								5.19	2.58	4.08	2.78	1.63				0	4.17	1	1	1								1	1	1	1
FALSE	High	Master Protein	A0A087ZZ62	Proteasome subunit beta OS=Apis mellifera OX=7460 GN=LOC411206 PE=3 SV=1		0	FALSE	15.328	15	4	4	4	282	31.6	7.5																		5.33		5.2
FALSE	High	Master Protein	A0A088AM79	Proteasome subunit beta OS=Apis mellifera OX=7460 GN=LOC411520 PE=3 SV=1		0	FALSE	16.663	16	4	9	4	267	30	7.84		0				4.92					4.73							2.05		8.71		1				2					2
FALSE	High	Master Protein	A0A088AMG0	Proteasome subunit beta OS=Apis mellifera OX=7460 GN=LOC552579 PE=3 SV=1		0	FALSE	12.173	21	4	11	4	205	23	5.25	0	4.6				2.2		2.59			4.28	2.25					3.17			0	1	2				1		1			3	1
FALSE	High	Master Protein	A0A087ZMT8	PROTEASOME_ALPHA_1 domain-containing protein OS=Apis mellifera OX=7460 PE=4 SV=1		0	FALSE	15.546	34	3	5	3	119	13.1	6.79		2.39				2.32					2.36							1.84		4.92		1				1					1
FALSE	High	Master Protein	A0A088A7Y2	Protein disulfide-isomerase OS=Apis mellifera OX=7460 GN=ERp60 PE=3 SV=1		0	FALSE	171.764	66	29	252	29	490	55.8	5.77	62.55	21.22	12.04		6.15	95.87	19.27	15.64	2.49	2.04	68.95	59.21	10.96	63.72	14.27	43.66	68	52.05	11.16	20.73	16	7	4		3	18	6	5	3	1	14	14	4	14
FALSE	High	Master Protein	A0A088A7L2	Protein disulfide-isomerase OS=Apis mellifera OX=7460 PE=3 SV=1		0	FALSE	134.791	60	26	165	26	496	56.2	5.12	40.72	10.89	7.95		2.04	52.13	18.46	25.8	3.92		30.44	22.4		36.54	13.21	23.93	54.46	14.28	23.28	34.23	9	3	6		1	13	8	7	3		8	6		10
FALSE	High	Master Protein	A0A088A8P9	Protein kinase C OS=Apis mellifera OX=7460 GN=aPKC PE=3 SV=1		0	FALSE	9.092	5	2	3	2	782	87.7	5.83						3.3					4.3						0									1					1
FALSE	High	Master Protein	A0A088A4Q2	Protein kinase domain-containing protein OS=Apis mellifera OX=7460 GN=CaMKI PE=3 SV=1		0.001	FALSE	5.821	6	2	4	2	374	41.9	6.55											2.04	0					4.42														1	1
FALSE	High	Master Protein	A0A087ZW71	Protein kinase domain-containing protein OS=Apis mellifera OX=7460 GN=CkIIalpha PE=3 SV=1		0	FALSE	59.688	26	10	69	10	468	55.6	8.56	5.83	10.66	2.22	2.65	2.14	13.01	22.4	10.29	4.23	9.09	30.49	10.39	11.07	10.22	7.83	3.36	2.8	8.16	0	7.63	2	3	1	1	2	3	6	3	3	3	7	2	6	3
FALSE	High	Master Protein	A0A088AFE4	Protein kinase domain-containing protein OS=Apis mellifera OX=7460 GN=Csnk1a1 PE=3 SV=1		0	FALSE	16.502	14	4	37	3	350	40.3	9.51	4.14	1.84	1.74	0	0	3.61	3.85	8.24		7.35	6.12	2.08	5.66	1.96	1.89			0	0		1	1	2	1	2	2	2	3		3	2	1	2	2
FALSE	High	Master Protein	A0A088AGR0	Protein kinase domain-containing protein OS=Apis mellifera OX=7460 GN=GckIII PE=4 SV=1		0.002	FALSE	3.666	2	1	1	1	680	76.3	8.35																		2.27
FALSE	High	Master Protein	A0A088AAV8	Protein kinase domain-containing protein OS=Apis mellifera OX=7460 GN=LOC413190 PE=4 SV=1		0	FALSE	15.111	7	4	6	4	703	79.7	6.57						2.02										0		2.82	2.24	2.68						1
FALSE	High	Master Protein	A0A088ATD3	Protein kinase domain-containing protein OS=Apis mellifera OX=7460 PE=3 SV=1		0	FALSE	44.831	34	9	48	8	410	46.4	8.51	9.12	2.3			2.12	20.24	3.47		2.42	5.05	26.75	2.8	13.9	13.82	1.98	5.42	5.53	5.27	2.06		3	1			1	6	3		1	2	7	1	4	4
FALSE	High	Master Protein	A0A088ARQ8	Protein kinase domain-containing protein OS=Apis mellifera OX=7460 PE=4 SV=1		0.001	FALSE	5.398	1	1	1	1	2595	289.9	8.87														2.95																				1
FALSE	High	Master Protein	A0A087ZP17	Protein kinase domain-containing protein OS=Apis mellifera OX=7460 PE=4 SV=1		0	FALSE	6.893	3	1	8	1	652	72	8.22	5.5					6.09	0				6.2			2.83							1					1	1				1			1
FALSE	High	Master Protein	A0A088AFF5	Protein kinase domain-containing protein OS=Apis mellifera OX=7460 PE=4 SV=1		0	FALSE	13.621	3	3	9	3	1634	187.9	7.81	0					2.64	2.27				5.22	2.04		0			0			2.53	1					1	1				2	1		1
FALSE	High	Master Protein	A0A088AV92	Protein kinase domain-containing protein OS=Apis mellifera OX=7460 PE=4 SV=1		0	FALSE	11.776	9	4	13	3	515	58.6	8.68					0	1.79	0	5.71		0	1.81		1.61	0		0	2.65	0	0						1	1	1	2		1	1		1	1
FALSE	High	Master Protein	A0A088AP50	Protein kinase domain-containing protein OS=Apis mellifera OX=7460 PE=4 SV=1		0	FALSE	50.632	19	6	50	6	512	58.4	9.06	10.38	4.34	4.44	1.98	4.41	33.13	3.53		1.85		32.92	6.8	5.79	17.66	0		25.6		2.92		2	1	2	2	2	4	1		1		6	2	2	3
FALSE	High	Master Protein	A0A088AVD7	Protein lin-7 homolog OS=Apis mellifera OX=7460 GN=LOC552362 PE=3 SV=1		0	FALSE	19.682	20	3	8	3	198	21.8	8.15						4.6		2.68			4.34		3.94			3.09	2.6	6.09								1		1			1		1
FALSE	High	Master Protein	A0A088ACJ9	Protein RER1 OS=Apis mellifera OX=7460 GN=LOC410094 PE=3 SV=1		0	FALSE	18.507	23	4	10	4	197	23.6	8.82								2.39			2.29	0	2.19	2.03	0		0	5.9		2.24								1			1	1	1	1
FALSE	High	Master Protein	A0A088AP14	Protein transport protein SEC23 OS=Apis mellifera OX=7460 GN=LOC408983 PE=3 SV=1		0	FALSE	43.503	16	8	18	8	775	86.5	7.01	3.36		0			12.85	5.68				16.43			9.41	0					2.73	1		1			4	2				5			3
FALSE	High	Master Protein	A0A088APZ1	Protein transport protein Sec61 subunit beta OS=Apis mellifera OX=7460 GN=Sec61beta PE=3 SV=1		0	FALSE	21.015	52	2	13	2	94	10	11	3.53		3.23			3.34	3.3	3.51			3.38	3.22	2.82		2.42		3.04	5.15	5.19		1		1			1	1	1			1	1	1
FALSE	High	Master Protein	A0A088AA80	Protein YIPF OS=Apis mellifera OX=7460 GN=102654121 PE=3 SV=1		0.001	FALSE	5.796	5	1	2	1	249	27.2	4.34																2.75				3.13
FALSE	High	Master Protein	A0A087ZYZ9	Protein-L-isoaspartate O-methyltransferase OS=Apis mellifera OX=7460 PE=3 SV=1		0	FALSE	21.916	30	4	4	4	264	28.6	5.41						13.46																				4
FALSE	High	Master Protein	A0A088AVM2	Protein-tyrosine sulfotransferase OS=Apis mellifera OX=7460 GN=Tango13 PE=3 SV=1		0.002	FALSE	3.754	3	1	1	1	380	43.1	8.85							2.41																				1
FALSE	High	Master Protein	A0A087ZXB2	Protoporphyrinogen oxidase OS=Apis mellifera OX=7460 GN=Ppox PE=3 SV=1		0	FALSE	20.082	13	4	8	4	477	53.3	9	0					7.1						2.61			1.78		2.6	2.87	4.09		1					2						1
FALSE	High	Master Protein	A0A088A0F6	PSP domain-containing protein OS=Apis mellifera OX=7460 GN=LOC726336 PE=4 SV=1		0.001	FALSE	5.802	2	1	1	1	728	80.7	5.82											3.31																				1
FALSE	High	Master Protein	A0A088AP40	P-type domain-containing protein OS=Apis mellifera OX=7460 PE=3 SV=1		0	FALSE	33.261	8	6	12	6	907	105.2	7.52	4.23					13.74					2.26			1.94						6.11	2					4					1			1
FALSE	High	Master Protein	A0A087ZR59	PUA domain-containing protein OS=Apis mellifera OX=7460 GN=LOC413805 PE=4 SV=1		0	FALSE	12.38	7	3	7	3	517	58.5	9.1		3.9					3.96	1.93		1.8	2.57				0			2.02				1					1	1		1	1
FALSE	High	Master Protein	A0A088AGW6	PUA domain-containing protein OS=Apis mellifera OX=7460 GN=LOC726009 PE=4 SV=1		0.002	FALSE	3.774	15	2	5	2	182	20.4	9.23						1.76					0			0				0	0							1					1			1
FALSE	High	Master Protein	I2CLT5	Putative ATP-dependent RNA helicase DDX46-like protein (Fragment) OS=Apis mellifera OX=7460 GN=GB15485 PE=3 SV=1		0.001	FALSE	4.666	3	1	6	1	301	33.5	8.09	2.21	0				2.32					2.2		1.99		1.67						1	1				1					1		1
FALSE	High	Master Protein	Q9NAS6	Putative cAMP-dependent protein kinase catalytic subunit OS=Apis mellifera carnica OX=88217 GN=co PE=2 SV=1		0	FALSE	15.056	12	3	18	3	353	40.6	8.81	5.25	2.62	2	2.14	2.18	2.63	2.76	1.68		2.58	5.09		2.49	2.37	1.7	2.47					1	1	1	1	1	1	1	1		1	2		1	2
FALSE	High	Master Protein	A0A222LPT2	Putative cyclin-dependent serine/threonine-protein kinase OS=Apis mellifera OX=7460 PE=2 SV=1		0	FALSE	99.249	17	17	40	17	1511	175.7	5.25				6.45	5.89	1.99		11.14	2.15	59.27			1.8			13.02		1.94	2.93					3	3	1		5	2	14			1
FALSE	High	Master Protein	A0A088A0Q2	Putative GTP cyclohydrolase 1 type 2 OS=Apis mellifera OX=7460 PE=4 SV=1		0	FALSE	8.941	8	1	2	1	274	30.4	6.68						2.31					0															1					1
FALSE	High	Master Protein	A0A088A8F0	Putative H3K9 methyltransferase OS=Apis mellifera OX=7460 PE=4 SV=1		0	FALSE	11.773	3	2	2	2	1026	115.7	8.27		3.23																		3.49		1
FALSE	High	Master Protein	A0A087ZTR2	PWWP domain-containing protein OS=Apis mellifera OX=7460 GN=LOC552332 PE=4 SV=1		0	FALSE	24.182	17	6	13	6	549	62.1	8.07	8.84	4.91				2.32	3.31				1.64							5.81	2.01		2	2				2	1				2
FALSE	High	Master Protein	A0A088AUI8	PWWP domain-containing protein OS=Apis mellifera OX=7460 PE=4 SV=1		0	FALSE	27.344	22	6	51	6	303	34	9.48	13.91	7.37	4.05	3.88	5.98	10.69	7.94	5.84	1.85	4.81	7.97	6.89	4.66	8.46	3.86	6.04	6.52	1.77	3.46		3	2	2	2	2	3	3	2	2	2	3	2	2	3
FALSE	High	Master Protein	A0A088AAU9	PWWP domain-containing protein OS=Apis mellifera OX=7460 PE=4 SV=1		0.005	FALSE	2.969	0	1	1	1	2764	308.4	5.29																		1.74
FALSE	High	Master Protein	A0A088A6E1	PX domain-containing protein OS=Apis mellifera OX=7460 GN=LOC409132 PE=4 SV=1		0	FALSE	6.414	7	1	2	1	163	19	9.14						2.08											2.58									1
FALSE	High	Master Protein	A0A088AL66	PX domain-containing protein OS=Apis mellifera OX=7460 PE=4 SV=1		0	FALSE	35.533	19	8	21	8	510	57.7	5.27	2.04					2.36	1.61		1.63		7.84					7.11	2.43	4.87	6.15	5.48	1					1	1		1		3
FALSE	High	Master Protein	A0A088AC70	Pyr_redox_2 domain-containing protein OS=Apis mellifera OX=7460 PE=4 SV=1		0	FALSE	154.506	52	21	270	21	469	53.3	9.1	71.87	28.46	55.52	14.51	0	82.47	68.91	114.81	4.85	3.23	86.29	43.06	51.26	49.93	29.45	22.51	14.22	35.62	11.62	15.66	12	8	12	5	2	15	17	18	3	1	15	10	12	8
FALSE	High	Master Protein	A0A087ZNH6	Pyruvate carboxylase OS=Apis mellifera OX=7460 GN=LOC412876 PE=4 SV=1		0	FALSE	147.383	30	25	177	25	1196	131.8	6.99	40.57	17.57	10.35			55.34	12.21	18.32		1.67	45.94	20.64	14.83	49.16	8.92	23.12	21.8	10.04	9.78	17.21	11	5	6			14	4	7		2	11	6	6	15
FALSE	High	Master Protein	A0A088AA89	Pyruvate dehydrogenase E1 component subunit alpha OS=Apis mellifera OX=7460 GN=LOC551103 PE=4 SV=1		0	FALSE	149.445	54	19	346	19	402	44.5	7.88	99.43	38.88	63.48	2.76	23.98	88.72	45.97	81.55	34.71	58.1	65.66	52.18	68.43	60.55	52.16	51.09	26.11	45.45	21.39	23.83	14	11	14	2	7	11	10	13	8	11	11	9	13	10
FALSE	High	Master Protein	A0A088AUU5	Pyruvate dehydrogenase E1 component subunit beta OS=Apis mellifera OX=7460 PE=4 SV=1		0	FALSE	160.466	60	16	365	16	335	36.3	5.44	87.39	45.55	57	15.26	24.21	94.33	69.8	73.09	44.38	55.67	87.25	77.49	75.82	70.3	42.88	59.66	51.81	51.18	47.95	56.49	9	8	9	4	7	10	9	9	10	10	10	11	11	10
FALSE	High	Master Protein	A0A088A5I8	Pyruvate kinase OS=Apis mellifera OX=7460 PE=3 SV=1		0	FALSE	344.292	62	29	526	29	609	66.5	7.31	142.9	67.05	30.31	21.36	8.56	236.63	56	45.27	32.42	18.04	214.3	84.3	29.62	161.32	52.88	224.2	53.8	82.7	65.33	36.28	22	11	8	8	3	24	12	11	10	6	25	14	8	20
FALSE	High	Master Protein	A0A087EQW1	Pyruvate kinase OS=Lactobacillus kunkeei OX=148814 GN=JI66_00890 PE=3 SV=1		0	FALSE	8.909	5	2	2	2	586	63	5.19												5.89																				2
FALSE	High	Master Protein	V5T7F3	Pyruvate kinase OS=Lactobacillus mellis OX=1218508 PE=3 SV=1		0.006	FALSE	2.916	2	1	1	1	603	65	5.07												3.07																				1
FALSE	High	Master Protein	A0A088AUN5	Rab GDP dissociation inhibitor OS=Apis mellifera OX=7460 GN=Gdi PE=3 SV=1		0	FALSE	57.663	36	10	32	10	442	49.8	5.58	3.9	7.21	0	2.2		18.84	3.68		0		15.4	3.96		10.04		1.81	5.9	0		4.54	1	2	1	3		4	2		1		3	1		2
FALSE	High	Master Protein	A0A087ZUJ9	Rab proteins geranylgeranyltransferase component A OS=Apis mellifera OX=7460 PE=3 SV=1		0	FALSE	39.501	18	6	18	6	511	57.9	4.84	0				0	7.87					4.32					15.12	0	2.02	2.16		1				1	2					1
FALSE	High	Master Protein	A0A088A8F1	Rab-GAP TBC domain-containing protein OS=Apis mellifera OX=7460 GN=RabGAP7 PE=4 SV=1		0.003	FALSE	3.425	3	1	8	1	357	41.6	8.34	0	2.1	0				1.86	1.79		1.94		1.84		2.28							1	1	1				1	1		1		1		1
FALSE	High	Master Protein	A0A088AE77	RanBD1 domain-containing protein OS=Apis mellifera OX=7460 GN=NUP50 PE=4 SV=1		0.002	FALSE	3.944	4	1	1	1	527	58	6.83						3.55																				1
FALSE	High	Master Protein	A0A088A9V7	RanGAP1_C domain-containing protein OS=Apis mellifera OX=7460 GN=LOC411909 PE=4 SV=1		0	FALSE	6.409	4	2	6	2	598	65.7	4.88	4.08					2.5					2.28	2.3		1.81							2					1					1	1		1
FALSE	High	Master Protein	A0A087ZTL5	Receptor expression-enhancing protein OS=Apis mellifera OX=7460 GN=LOC551678 PE=3 SV=1		0	FALSE	37.21	31	5	78	5	178	20.8	8.28	6.76	13.33	5.45	1.89	2.69	5.69	15.27	18.59		4.16	17.84	12.85	8.98	8.64	5.18	12.21	15.25	10.91	18.13	12.86	2	2	2	1	1	3	3	5		2	4	4	2	2
FALSE	High	Master Protein	A0A087ZZR0	Replication protein A subunit OS=Apis mellifera OX=7460 PE=3 SV=1		0.001	FALSE	5.826	5	3	7	3	584	65.7	6.06	0					2.35										1.87		3.94	0		1					2
FALSE	High	Master Protein	A0A087ZVF3	Reticulon-like protein OS=Apis mellifera OX=7460 GN=102656074 PE=4 SV=1		0	FALSE	87.9	34	5	233	5	210	23.4	8.25	68.8	63.68	52.52	32.7	37.33	70.39	62.25	71.22	17.88	49.04	47.7	43.05	64.75	67.29	52.46	205.27	31.68	37.22	28.72	15.99	3	4	4	3	3	4	3	4	3	4	4	3	4	5
FALSE	High	Master Protein	A0A087ZVF0	Reticulon-like protein OS=Apis mellifera OX=7460 PE=4 SV=1		0	FALSE	56.947	45	11	43	11	244	28.2	4.67	7.45	4.76	2.04			8.45	2.79	0			5.7	9.16	0	11.44		10.66	10.24	23.45	8.18		3	2	1			3	1	1			2	4	1	5
FALSE	High	Master Protein	A0A087ZYK5	RF_PROK_I domain-containing protein OS=Apis mellifera OX=7460 GN=LOC410376 PE=4 SV=1		0	FALSE	9.097	13	2	5	2	198	23	9.86	2.28							2.05						1.95				4.9			1							1						1
FALSE	High	Master Protein	A0A093SM94	Ribonuclease PH OS=Pectobacterium carotovorum subsp. carotovorum OX=555 GN=rph PE=3 SV=1		0.001	FALSE	4.735	7	1	1	1	238	25.5	6.23												3.51																				1
FALSE	High	Master Protein	A0A088AQW4	Ribonucloprotein OS=Apis mellifera OX=7460 GN=102655272 PE=3 SV=1		0.001	FALSE	5.331	9	1	7	1	127	13.9	7.85	3.1	3.33	2.44		2.23	3.05		2.62	2.45												1	1	1		1	1		1	1
FALSE	High	Master Protein	A0A088AFB1	Ribos_L4_asso_C domain-containing protein OS=Apis mellifera OX=7460 GN=RpL4 PE=4 SV=1		0	FALSE	143.117	43	18	445	17	429	48.3	11.53	61.8	70.05	43.75	64.99	51.18	64.85	76.19	78.46	29.6	78.29	74.12	74.55	73.63	86.74	60.35	28.62	6.87	58.09	38.67	16.02	10	15	13	15	12	10	16	12	12	15	15	13	13	15
FALSE	High	Master Protein	A0A087ZZ05	Ribosomal protein L15 OS=Apis mellifera OX=7460 GN=RpL15 PE=3 SV=1		0	FALSE	50.388	31	6	133	6	204	23.9	11.6	27.38	19.83	20.38	27.7	24.52	28.69	23.61	20.81	5.91	21.28	12.13	10.49	12.83	13.16	12.94	8.21	5.94	11.86	1.8	4.06	4	3	3	5	4	4	4	4	1	3	4	4	4	5
FALSE	High	Master Protein	X2JFT9	Ribosomal protein L19 OS=Apis mellifera OX=7460 GN=rpl19 PE=2 SV=1		0	FALSE	49.99	32	8	134	8	200	23.6	11.22	20.58	20.25	21.58	11.12	16.77	21.85	15.32	23.78	10.54	19.9	19.84	15.44	25.09	22.55	11.01	23.46		20.2	12.81	0	3	5	5	4	4	4	4	6	4	6	5	4	6	5
FALSE	High	Master Protein	A0A087ZP25	Ribosomal protein L37 OS=Apis mellifera OX=7460 GN=RpL37 PE=3 SV=1		0.005	FALSE	3.038	12	1	3	1	91	10.7	11.56			0	0	0																		1	1	1
FALSE	High	Master Protein	A0A088AA42	Ribosomal_L16 domain-containing protein OS=Apis mellifera OX=7460 GN=mRpL16 PE=4 SV=1		0.002	FALSE	3.685	5	1	1	1	240	28.1	10.02													2.65																				1
FALSE	High	Master Protein	A0A087ZQ36	Ribosomal_L16 domain-containing protein OS=Apis mellifera OX=7460 GN=RpL10 PE=4 SV=1		0	FALSE	62.487	51	9	171	9	219	25	10.02	22.79	23.34	15	8.62	8.7	33.07	34.41	32.43	10.08	33.78	39.8	30.78	26.37	27.29	22.99	16.63	26.77	20.38	17.13	14.34	4	5	5	2	4	7	7	7	5	6	6	6	5	6
FALSE	High	Master Protein	A0A088AL09	Ribosomal_L18_c domain-containing protein OS=Apis mellifera OX=7460 GN=RpL5 PE=3 SV=1		0	FALSE	86.664	52	12	194	12	298	34.3	9.69	32.44	31.6	18.62	24.69	30.82	35.86	39.97	38.29	12.03	19.15	31.98	25.63	40.7	30.61	20.71	30.4	14.78	23.83	9.71	4.71	9	7	7	5	5	9	7	7	4	8	7	7	8	6
FALSE	High	Master Protein	A0A088A2E6	Ribosomal_L18e/L15P domain-containing protein OS=Apis mellifera OX=7460 GN=mRpL15 PE=3 SV=1		0	FALSE	10.247	13	3	17	3	293	33.7	9.07	4.36	3.21	0			2.31	0	2.51		2.05	3.26	2.64	2.41	2.05					0	1.91	2	1	1			2	1	1		1	1	1	1	1
FALSE	High	Master Protein	A0A088AIL2	Ribosomal_L18e/L15P domain-containing protein OS=Apis mellifera OX=7460 GN=RpL27A PE=3 SV=1		0	FALSE	46.198	32	7	129	7	147	16.7	10.54	22.37	31.5	15.32	10.22	12.7	25.93	22.61	22.8	8.52	17.59	24.98	26.45	23.36	16.74	19.21	16.1	2.65	12.54	8.68	2.88	3	5	4	5	4	4	3	4	3	4	5	5	4	3
FALSE	High	Master Protein	A0A088ABL2	Ribosomal_L2_C domain-containing protein OS=Apis mellifera OX=7460 GN=RpL8 PE=3 SV=1		0	FALSE	79.537	45	11	145	11	257	28.1	10.92	16.98	14.48	10.62	10.85	16.8	19.1	34.42	30.76	6.8	19.47	33.61	22.17	21.42	22.06	14.52	11.97	6.62	13.08	7.14		5	5	5	5	5	6	7	8	4	5	7	6	6	6
FALSE	High	Master Protein	A0A088AJK1	Ribosomal_L23eN domain-containing protein OS=Apis mellifera OX=7460 GN=RpL23A PE=3 SV=1		0	FALSE	33.308	32	8	109	8	241	26.6	10.73	8.58	7.56	5.51	10.43	8.19	15.03	20.48	9.08	3.41	14.84	15.17	9.15	13.03	10.87	8.3	13.45	0	16.82	2.61	4.32	4	3	3	4	4	5	6	3	3	4	5	4	5	5
FALSE	High	Master Protein	A0A088ALQ3	Ribosomal_L28e domain-containing protein OS=Apis mellifera OX=7460 GN=RpL28 PE=4 SV=1		0	FALSE	25.063	34	5	53	5	138	15.7	11.31	11.35	4.17	8.77	13.87	12.19	10.73	6.71	14.67		12.08	4.41	4.76	3.82	5.84	3.56	3.62		16.13		3.91	3	2	3	4	3	2	2	3		3	1	1	1	2
FALSE	High	Master Protein	A0A088A8Q3	Ribosomal_L6e_N domain-containing protein OS=Apis mellifera OX=7460 GN=RpL6 PE=4 SV=1		0	FALSE	126.401	50	17	280	17	274	31.8	10.48	41.6	42.12	29.04	31.07	31.97	64.01	73.25	66.69	4.68	52.04	54.68	39.81	47.86	59.32	31.73	19.27	6.48	30.8	15.49	9.78	8	11	6	8	9	12	11	10	4	11	10	10	9	11
FALSE	High	Master Protein	A0A088AHA4	Ribosomal_L7Ae domain-containing protein OS=Apis mellifera OX=7460 GN=RpL30 PE=3 SV=1		0	FALSE	38.29	52	5	48	5	114	12.5	9.83	10.58	17.56	8.02	5.68	11.67	10.08	8.06	7.33		11.16	11.71	4.91	10.44	14.74	9.6	6.04		11.44	2.95	3.1	3	2	2	2	4	3	2	2		3	3	1	3	4
FALSE	High	Master Protein	A0A088A266	Ribosomal_L7Ae domain-containing protein OS=Apis mellifera OX=7460 GN=RpL7A PE=4 SV=1		0	FALSE	77.463	50	16	169	16	268	30.4	10.61	16.93	23.93	18.05	30.29	21.94	18.79	29.01	21.62	3.95	14.14	29.55	12.24	13.63	16.83	8.8	30.88	15.97	34.8	28.8	2.91	6	5	6	8	7	9	9	7	4	5	8	4	6	8
FALSE	High	Master Protein	A0A088AB54	RIBOSOMAL_L9 domain-containing protein OS=Apis mellifera OX=7460 GN=LOC725866 PE=4 SV=1		0.001	FALSE	4.584	4	1	1	1	271	31.9	9.47																		2.19
FALSE	High	Master Protein	A0A087ZP70	Ribosomal_S10 domain-containing protein OS=Apis mellifera OX=7460 GN=RpS20 PE=3 SV=1		0	FALSE	36.041	32	3	84	3	121	13.7	9.94	16.47	15.77	11.11	11.79	16.64	21.63	10.5	14.39	5.82	12.51	9.2	11.83	10.25	9.89	9.91	18.12	10.5	19.06	18.2	6.27	2	3	2	2	2	2	1	1	2	1	2	2	2	1
FALSE	High	Master Protein	A0A087ZQ43	Ribosomal_S13_N domain-containing protein OS=Apis mellifera OX=7460 GN=RpS13 PE=3 SV=1		0	FALSE	36.461	42	6	161	6	151	17.2	10.36	29.85	23.72	14.52	6.64	13.83	25.18	19.48	24.47	7.19	18.06	22.91	21.47	22.45	25.15	14.61	7.59	7.65	8.81	3.95	0	5	4	4	3	4	5	5	5	4	4	5	5	5	5
FALSE	High	Master Protein	A0A088A637	Ribosomal_S17_N domain-containing protein OS=Apis mellifera OX=7460 GN=RpS11 PE=3 SV=1		0	FALSE	39.128	43	6	140	6	155	18.1	10.93	18.94	23.89	17.44	24.79	19.97	17.59	16.24	21.97	2.02	20.19	21.94	11.8	20.39	23.7	21.27	7.74	2.37	12.3	8.44	11.16	5	5	4	6	6	5	4	6	2	5	6	3	6	6
FALSE	High	Master Protein	A0A088AEQ9	Ribosomal_S7 domain-containing protein OS=Apis mellifera OX=7460 GN=mRpS7 PE=3 SV=1		0.002	FALSE	4.061	7	2	5	2	227	26.8	9.69	0					0	0	1.67											0		1					1	1	1
FALSE	High	Master Protein	A0A088A389	Ribosomal_S7 domain-containing protein OS=Apis mellifera OX=7460 GN=RpS5a PE=3 SV=1		0	FALSE	79.386	36	11	237	11	216	24.1	9.45	36.19	34.06	30.44	23.01	16.79	46	27.89	45.63	18.09	30.57	37.47	32.67	26.18	36.13	32.67	16.57	27.47	21.81	18.08	14.5	8	6	7	6	6	9	7	8	7	8	8	6	7	8
FALSE	High	Master Protein	A0A088A2L6	RIC3 domain-containing protein OS=Apis mellifera OX=7460 PE=4 SV=1		0	FALSE	52.7	19	10	71	10	718	81.5	5.24	13.17	16.12	13.22	3.18		10.68	17.54	13.67	2.55	14.26	7.27	1.74	12.4	10.3	3.95	8.1	4.71	5.92	3.18	5.26	3	4	4	1		3	5	4	1	4	4	1	4	4
FALSE	High	Master Protein	A0A088ACS4	Rieske domain-containing protein OS=Apis mellifera OX=7460 PE=4 SV=1		0	FALSE	22.483	12	4	21	4	586	65.6	7.55	0				2.17	2.43	6.38				0	7.57	4.2	0							2				1	2	4				2	3	2	2
FALSE	High	Master Protein	A0A088A0G5	RING-type domain-containing protein OS=Apis mellifera OX=7460 GN=100576667 PE=4 SV=1		0.003	FALSE	3.444	2	1	1	1	600	67.7	8.25								3.47																				1
FALSE	High	Master Protein	A0A088AC30	RING-type domain-containing protein OS=Apis mellifera OX=7460 GN=LOC410740 PE=4 SV=1		0.002	FALSE	4.241	4	1	1	1	338	39.3	8.03																		2.64
FALSE	High	Master Protein	A0A087ZTA3	RING-type domain-containing protein OS=Apis mellifera OX=7460 GN=LOC411081 PE=4 SV=1		0.001	FALSE	5.562	7	2	3	2	320	36.3	8.03																		2.77	2.23
FALSE	High	Master Protein	A0A088AFC8	RING-type domain-containing protein OS=Apis mellifera OX=7460 GN=Trc8 PE=4 SV=1		0.002	FALSE	4.191	2	1	7	1	661	75.8	7.03	0		0			1.81	0				1.93			2.09							1		1			1	1				1			1
FALSE	High	Master Protein	A0A088A9F4	RING-type domain-containing protein OS=Apis mellifera OX=7460 PE=4 SV=1		0	FALSE	23.515	4	6	16	6	1768	194.8	5.4	5.89			0		2.53	1.92		0		0		3.51	1.9	1.76	2.3	3.08			5.61	2			1		1	1		1		1		2	1
FALSE	High	Master Protein	A0A088AC57	RNA-binding protein 8A OS=Apis mellifera OX=7460 GN=tsu PE=3 SV=1		0.002	FALSE	4.145	6	1	1	1	166	19	5.1						2.15																				1
FALSE	High	Master Protein	A0A088ANL1	RNase III domain-containing protein OS=Apis mellifera OX=7460 GN=mRpL44 PE=4 SV=1		0	FALSE	14.854	7	1	25	1	313	35.6	8.72	10.59	6.74	5.84	0	2.18	6.63	7.17	6.86		3.89	7.92	7.12	7.71	6.94	2.96						1	1	1	1	1	1	1	1		1	1	1	1	1
FALSE	High	Master Protein	A0A088A9Z3	RPN13_C domain-containing protein OS=Apis mellifera OX=7460 GN=LOC413299 PE=4 SV=1		0	FALSE	46.126	38	8	41	8	399	43.2	5.63	6.16	4.13	0		1.65	25.96	21.87	2.15			18.94	6.91	1.65	1.73		3.63	15.08	8.49	3.64	0	2	2	1		1	5	5	1			5	3	1	1
FALSE	High	Master Protein	A0A088AIM4	RPN2_C domain-containing protein OS=Apis mellifera OX=7460 PE=4 SV=1		0	FALSE	25.129	20	5	19	5	364	40.8	6.33		2.86				3.02	0	2.58			8.75	2.3	3.13	3.03	2.33	2.62	10.73	6.56	0			1				1	1	2			3	1	1	1
FALSE	High	Master Protein	A0A088AS20	RRF domain-containing protein OS=Apis mellifera OX=7460 PE=4 SV=1		0	FALSE	11.085	14	2	4	2	259	30.7	9.23									0								6.99	2.01											1
FALSE	High	Master Protein	A0A088A2F5	RRM domain-containing protein OS=Apis mellifera OX=7460 GN=100578161 PE=4 SV=1		0	FALSE	8.92	9	3	9	3	451	52.4	9.36	2.28	0				3	4.91				2.87		2.34								1	1				3	2				1		1
FALSE	High	Master Protein	A0A088A8P7	RRM domain-containing protein OS=Apis mellifera OX=7460 GN=413835 PE=4 SV=1		0	FALSE	18.338	22	4	27	4	193	22.5	11.5	2.43	4.17	2.18			4.27	6.22	3.7	2.17		2.25	4.58				2.08	5.11	8.99	3.44	6.54	1	2	1			2	3	2	2		2	2
FALSE	High	Master Protein	A0A088AKG6	RRM domain-containing protein OS=Apis mellifera OX=7460 GN=Imp PE=4 SV=1		0	FALSE	63.773	31	10	40	10	576	62.4	8.92	13.5	3.92	2.01			10.82	2.35	2.52	2.06		18.09	2.17		7.34	2.12	12.53	2.41	10.99	1.92		5	1	2			3	1	1	1		7	1		3
FALSE	High	Master Protein	A0A087ZY55	RRM domain-containing protein OS=Apis mellifera OX=7460 GN=LOC409065 PE=4 SV=1		0	FALSE	17.791	10	4	13	4	464	54.5	6.57	4.92					6.72					7.47			6.65			2.13				3					2					3			2
FALSE	High	Master Protein	A0A088AKG9	RRM domain-containing protein OS=Apis mellifera OX=7460 GN=LOC409379 PE=4 SV=1		0	FALSE	11.131	13	2	2	2	274	29.9	9.32																6.17
FALSE	High	Master Protein	A0A088A7J9	RRM domain-containing protein OS=Apis mellifera OX=7460 GN=LOC409486 PE=4 SV=1		0	FALSE	17.061	13	3	4	3	416	43.1	8.56						5.5					2.69						5.92									2					1
FALSE	High	Master Protein	A0A088ADR8	RRM domain-containing protein OS=Apis mellifera OX=7460 GN=LOC409560 PE=4 SV=1		0	FALSE	7.092	8	1	1	1	502	57.4	8.47																	3.2
FALSE	High	Master Protein	A0A087ZZC6	RRM domain-containing protein OS=Apis mellifera OX=7460 GN=Pabp2 PE=4 SV=1		0	FALSE	13.049	14	2	4	2	228	25.7	5.97						3.45					3.37					3.41	3.13									1					1
FALSE	High	Master Protein	A0A088A1A3	RRM domain-containing protein OS=Apis mellifera OX=7460 GN=RnpS1 PE=4 SV=1		0.002	FALSE	4.05	4	1	1	1	326	37.2	11.63																	3.49
FALSE	High	Master Protein	A0A088A8G8	RRM domain-containing protein OS=Apis mellifera OX=7460 PE=4 SV=1		0	FALSE	6.339	4	1	1	1	486	55.9	10.96														3.82																				1
FALSE	High	Master Protein	A0A088A1R1	RRM domain-containing protein OS=Apis mellifera OX=7460 PE=4 SV=1		0	FALSE	7.744	12	2	6	2	163	18.9	8.65						1.78	2.15	2.32			2.26		1.63							2.78						1	1	1			1		1
FALSE	High	Master Protein	A0A088ABX8	RRM domain-containing protein OS=Apis mellifera OX=7460 PE=4 SV=1		0	FALSE	17.907	11	4	23	4	484	56.7	5.57	2.85	0		2.61	2.93	8.91	8.24	5.63	0	4.83	2.58	2.69	2.42			2.47		0			2	1		1	1	3	3	2	1	2	2	1	1
FALSE	High	Master Protein	A0A088A412	RRM domain-containing protein OS=Apis mellifera OX=7460 PE=4 SV=1		0	FALSE	39.646	10	5	25	5	816	89.7	9.29		1.87				8.03	5.57	6.12			3.52	5.55	4.73	3.09		2.95	3.09	7.34	1.93			1				3	3	2			2	2	2	2
FALSE	High	Master Protein	A0A088A1R3	RRM domain-containing protein OS=Apis mellifera OX=7460 PE=4 SV=1		0	FALSE	25.687	11	3	19	3	241	27.9	11.78	5.3		2.29			8.39	3.06	2.78									19.16	8.51		7.1	1		1			2	1	1
FALSE	High	Master Protein	A0A088AH65	RRM domain-containing protein OS=Apis mellifera OX=7460 PE=4 SV=1		0	FALSE	38.286	33	5	29	5	247	26.7	11.06	2.76	2.91		2.65	2.92	2.15	3.22		5.35		6.48				2.88	12.86	25.22	10.63	5.11		1	1		1	1	2	1		2		2
FALSE	High	Master Protein	A0A088ADR9	RRM domain-containing protein OS=Apis mellifera OX=7460 PE=4 SV=1		0	FALSE	8.446	12	2	5	2	178	19.7	9.23						2.3					2.01			2.35		2.34		2.16								1					1			1
FALSE	High	Master Protein	A0A088ABW1	RRM domain-containing protein OS=Apis mellifera OX=7460 PE=4 SV=1		0.001	FALSE	4.585	6	1	1	1	272	30.2	9.95						2.31																				1
FALSE	High	Master Protein	A0A087ZY56	RRM domain-containing protein OS=Apis mellifera OX=7460 PE=4 SV=1		0	FALSE	33.547	28	6	16	6	282	29.5	6.52	5.83					14.18					10.45			4.12		5.21	7.37		0		2					2					3			1
FALSE	High	Master Protein	A0A087ZSJ5	RuvB-like helicase OS=Apis mellifera OX=7460 GN=pontin PE=3 SV=1		0	FALSE	13.355	10	3	4	3	456	50	6.76						8.57					3.13															3					1
FALSE	High	Master Protein	A0A088ANA3	S-(hydroxymethyl)glutathione dehydrogenase OS=Apis mellifera OX=7460 GN=Fdh PE=3 SV=1		0	FALSE	27.798	23	6	24	6	377	40.4	7.28	5.85	7.3	2.49	2.26		6.45	7.36	5.99			9.19	3.18	3.91	6.36			5.82	4.42		2.06	1	1	1	1		2	1	1			2	1	1	1
FALSE	High	Master Protein	A0A087ZNQ6	S1 motif domain-containing protein OS=Apis mellifera OX=7460 PE=4 SV=1		0.002	FALSE	4.13	4	1	1	1	282	31.6	4.75																	3.02
FALSE	High	Master Protein	A0A088AB73	S1 motif domain-containing protein OS=Apis mellifera OX=7460 PE=4 SV=1		0	FALSE	11.307	6	3	4	3	747	83.8	8.65						3.54						2.98	1.74							1.87						1						1	1
FALSE	High	Master Protein	A0A088AHT2	S10_plectin domain-containing protein OS=Apis mellifera OX=7460 GN=LOC409552 PE=4 SV=1		0	FALSE	59.023	43	7	161	7	159	17.9	9.83	38.79	29.88	22.68	25.67	24.3	34.14	22.1	34.32	25.82	24.3	36.76	23.57	29.64	31.75	23.17	6.68	0	13.33			6	4	4	5	4	6	4	5	7	5	5	4	5	5
FALSE	High	Master Protein	A0A088AC67	S4 RNA-binding domain-containing protein OS=Apis mellifera OX=7460 GN=RpS9 PE=3 SV=1		0	FALSE	60.998	58	16	265	16	193	22.5	10.74	25.14	18.95	18.08	34.47	29.06	37.52	22.31	41.75	5.3	31.54	41.28	34.41	34.71	25.89	28.47	21.95	10.52	31.29	14.17	21.03	9	7	9	11	10	13	8	13	3	11	12	11	11	11
FALSE	High	Master Protein	A0A087ZQV2	S5 DRBM domain-containing protein OS=Apis mellifera OX=7460 GN=RpS2 PE=3 SV=1		0	FALSE	169.089	60	18	376	18	280	30.3	10.13	68.83	71.9	54.64	33.43	38.37	76.97	74.28	83.7	16.43	59.43	75.51	68.29	56.94	73.58	56.11	14.26	14.03	30.62	14.24	8.45	14	15	11	7	8	14	14	17	3	15	16	13	13	13
FALSE	High	Master Protein	A0A087ZZ41	SAC domain-containing protein OS=Apis mellifera OX=7460 GN=Sac1 PE=4 SV=1		0	FALSE	9.288	6	2	6	2	584	67.3	8.57						2.11	5.29	2.33				0	0													1	2	1				1	1
FALSE	High	Master Protein	A0A088AL97	Sacchrp_dh_NADP domain-containing protein OS=Apis mellifera OX=7460 PE=4 SV=1		0	FALSE	244.868	74	27	649	27	422	47.4	8.37	120.77	80.79	113.1	45.44	62.55	91.34	113.7	127.33	10.2	52.96	137.27	114.85	101.81	109.85	79.51	88.27	29.26	102.72	31.63	30.72	16	16	21	12	15	17	19	21	7	11	19	19	17	19
FALSE	High	Master Protein	A0A088A327	SAM domain-containing protein OS=Apis mellifera OX=7460 GN=Stim PE=4 SV=1		0.006	FALSE	2.909	1	1	10	1	687	76.2	5.94		3.99				1.89	1.98	1.73				1.88	1.88	1.91	1.75		0					1				1	1	1				1	1	1
FALSE	High	Master Protein	A0A087ZTV1	SAM_Exu domain-containing protein OS=Apis mellifera OX=7460 GN=exu PE=4 SV=1		0	FALSE	15.474	12	3	5	3	406	45.6	8.75			0			3.46											2.41	2.93	1.67				1			1
FALSE	High	Master Protein	A0A088A156	SAM_MT_RSMB_NOP domain-containing protein OS=Apis mellifera OX=7460 GN=LOC410262 PE=3 SV=1		0.004	FALSE	3.228	2	1	2	1	607	69.3	7.99						0					0															1					1
FALSE	High	Master Protein	A0A088AK82	SAM-dependent MTase TRM10-type domain-containing protein OS=Apis mellifera OX=7460 PE=4 SV=1		0	FALSE	13.378	11	3	13	3	387	46.5	9.47	2.51		2.09	2.39	1.6	2.36	6.03	2.44	0			2.65	2.46		1.92						1		1	2	1	1	2	1	1			1	1
FALSE	High	Master Protein	A0A088A896	SAP domain-containing protein OS=Apis mellifera OX=7460 GN=LOC551151 PE=4 SV=1		0	FALSE	7.652	10	2	3	2	248	27.9	9.09													2.54						2.08														2
FALSE	High	Master Protein	A0A088AIP8	SCP2 domain-containing protein OS=Apis mellifera OX=7460 GN=LOC552717 PE=4 SV=1		0	FALSE	44.587	27	8	39	8	413	45.2	8.53	14.15	5.02	0	0	1.76	20.11	7.1	1.85	0		5.61		2.2	7.55	1.8	3.62	5.94	6.76		3.93	4	2	1	1	1	6	3	1	2		2		1	3
FALSE	High	Master Protein	A0A088AK33	Sec16_C domain-containing protein OS=Apis mellifera OX=7460 PE=4 SV=1		0.001	FALSE	5.748	1	1	1	1	2506	287.8	5.64						2.07																				1
FALSE	High	Master Protein	A0A087ZN54	Secretory carrier-associated membrane protein OS=Apis mellifera OX=7460 GN=Scamp PE=3 SV=1		0	FALSE	20.274	16	3	10	3	354	39.4	7.25	4.59					7.93										2.39	6.99	5.87	0		1					2
FALSE	High	Master Protein	A0A088ATJ3	Sema domain-containing protein OS=Apis mellifera OX=7460 PE=4 SV=1		0	FALSE	6.96	1	1	13	1	1915	214.1	6.48	5.6	3.38	2.09			3.28	3.18	5.15		2.55	3.62		3.02	2.9	2.35						1	1	1			1	1	1		1	1		1	1
FALSE	High	Master Protein	A0A088AQX9	Serine hydroxymethyltransferase OS=Apis mellifera OX=7460 GN=LOC411796 PE=3 SV=1		0	FALSE	14.115	12	3	4	3	522	58.6	8.72	0					7.71															1					3
FALSE	High	Master Protein	A0A087ZUP4	Serine/threonine protein phosphatase 2A regulatory subunit OS=Apis mellifera OX=7460 GN=LOC408949 PE=3 SV=1		0	FALSE	11.5	8	3	8	2	564	65.9	6.46						5.78					2.31			2.29			3.86			0						1					1			1
FALSE	High	Master Protein	A0A088AB82	Serine/threonine protein phosphatase 2A regulatory subunit OS=Apis mellifera OX=7460 PE=3 SV=1		0	FALSE	34.76	21	7	14	6	474	55.4	7.47						4.7					2.04					0	7.64	7.19	6.77							2					1
FALSE	High	Master Protein	A0A088AUP5	Serine/threonine-protein phosphatase OS=Apis mellifera OX=7460 GN=LOC409430 PE=3 SV=1		0	FALSE	51.238	46	9	37	5	329	37.4	6.76	11.34	5.58				15.55	11.17	4.65			31.23	9.4	9.29	3.59				3.32	2.55	2.95	4	2				5	3	2			8	3	3	1
FALSE	High	Master Protein	A0A087ZV34	Serine/threonine-protein phosphatase OS=Apis mellifera OX=7460 GN=LOC409804 PE=3 SV=1		0	FALSE	25.133	18	5	13	1	352	40.4	6.76	2.46					5.72	4.78				8.71	2.91	3						2.55	2.95	1					3	2				3	1	1
FALSE	High	Master Protein	A0A088ADM2	Serine/threonine-protein phosphatase OS=Apis mellifera OX=7460 GN=LOC411046 PE=3 SV=1		0	FALSE	15.494	6	5	7	5	1283	144.8	5.11	1.81					5.36													2.04	0	2					3
FALSE	High	Master Protein	A0A088A299	Serine/threonine-protein phosphatase OS=Apis mellifera OX=7460 GN=mts PE=3 SV=1		0	FALSE	41.048	27	5	16	4	309	35.4	5.53	8.74					12.09	5.48				11.62					4.81	3.77			4.67	3					3	2				3
FALSE	High	Master Protein	A0A088AJF1	Serine/threonine-protein phosphatase OS=Apis mellifera OX=7460 PE=3 SV=1		0	FALSE	10.768	11	2	2	1	250	28.7	5.8	2.97																	2.72			1
FALSE	High	Master Protein	I2CJE5	Serologically-defined colon cancer antigen 1-like protein (Fragment) OS=Apis mellifera OX=7460 GN=GB17050 PE=4 SV=1		0.001	FALSE	5.475	7	1	4	1	273	31.2	6.02											0	0	0	2.56																	1	1	1	1
FALSE	High	Master Protein	A0A088AS87	SERPIN domain-containing protein OS=Apis mellifera OX=7460 GN=100577408 PE=3 SV=1		0	FALSE	33.679	15	8	26	8	640	73.1	9.33	3.48	3.11	2.25	7.48	7.76	4.12	3.14	6.85	8.25	3.59	4.31	4.29	4.13	9.22	3.67				1.97		1	1	1	2	3	1	1	2	4	1	1	1	1	3
FALSE	High	Master Protein	A0A088ASF2	SERPIN domain-containing protein OS=Apis mellifera OX=7460 GN=serpin-5 PE=3 SV=1		0	FALSE	102.7	50	16	147	16	451	50.7	7.96	31.87	12.26	10.14	20.58	9.5	17.11	22.35	9.93	18.03	6.71	40.24	0	35.42	23.55	10.76	11.64	7.92	8.93	10.2	7.26	10	3	5	6	4	6	8	5	7	3	10	1	10	9
FALSE	High	Master Protein	A0A088ABM1	SERPIN domain-containing protein OS=Apis mellifera OX=7460 PE=3 SV=1		0	FALSE	50.966	38	10	67	10	342	38.6	6.43	22.97	0		6.29		10.51	0	1.93	12.46		21.26		22.42	10.5	2.5	4.83	12.73	5.08	5.43	5.2	7	1		3		4	1	1	5		8		7	5
FALSE	High	Master Protein	A0A088AD78	SET domain-containing protein OS=Apis mellifera OX=7460 GN=LOC412862 PE=4 SV=1		0	FALSE	45.496	24	9	27	9	513	57.8	6.37	6	3.86		2.6	2.38	15.42	3.55		2.03		10.19	3.45		2.73		4.75	2.62		5.01	10.34	2	1		1	1	3	1		1		3	1		1
FALSE	High	Master Protein	A0A088ALL8	SH3 domain-containing protein OS=Apis mellifera OX=7460 GN=LOC408693 PE=4 SV=1		0	FALSE	208.748	47	29	233	29	878	99.8	6.09	43.51	10.7	1.91	4.06	27.59	52.43	29.42	14.28	12.06	24.69	94.78	47.71	15.72	38.13	16.42	44.21	24.82	62.23	20.86	19.58	12	6	2	3	11	17	10	5	6	9	19	12	5	12
FALSE	High	Master Protein	A0A087ZPY4	SH3 domain-containing protein OS=Apis mellifera OX=7460 PE=4 SV=1		0.002	FALSE	4.191	1	1	1	1	1300	147.1	4.81																				2.67
FALSE	High	Master Protein	A0A088A3R8	SHSP domain-containing protein OS=Apis mellifera OX=7460 GN=724449 PE=3 SV=1		0	FALSE	63.675	54	7	133	7	237	27.7	7.47	11.82	53.19	6.75	8.85	4.25	43.53	63.21	28.75	7.2	10.61	15.83	21.32	16.04	12.21	3.13	5.21	12.88	10.67	6.85	9.59	4	5	2	2	2	6	6	6	4	4	4	3	5	4
FALSE	High	Master Protein	A0A088APK1	SHSP domain-containing protein OS=Apis mellifera OX=7460 GN=LOC408875 PE=3 SV=1		0	FALSE	64.251	54	7	238	7	184	20.5	6.96	26.53	30.5	18.39	13.52	13.75	31.78	22.27	21.96	26.73	18.5	33.79	26.83	14.27	26.54	15.41	62.63	33.24	90.4	20.79	45.45	3	3	4	3	3	6	5	4	4	3	6	5	4	4
FALSE	High	Master Protein	A0A088AE90	SHSP domain-containing protein OS=Apis mellifera OX=7460 GN=LOC410857 PE=3 SV=1		0	FALSE	178.571	79	14	1346	14	191	22	6.23	133.26	121.1	112.67	162.39	80.95	528.98	164.53	157.24	233.65	59.47	225.39	108.59	81.09	174.92	96.94	471.16	155.6	218.65	151.22	110.28	10	9	11	13	9	13	13	12	12	10	10	9	9	11
FALSE	High	Master Protein	A0A088A7Z5	SHSP domain-containing protein OS=Apis mellifera OX=7460 GN=LOC412197 PE=3 SV=1		0	FALSE	175.248	76	15	381	15	174	20.4	6.43	62.8	61.72	51.23	32.52	19.63	95.95	91.93	86.01	55.49	37.95	76.45	71.88	68.06	78.96	41.3	41.36	62.19	19.49	17.34	35.99	10	10	7	6	3	14	14	13	10	7	11	10	10	10
FALSE	High	Master Protein	A0A088A3R5	SHSP domain-containing protein OS=Apis mellifera OX=7460 GN=LOC724274 PE=3 SV=1		0	FALSE	86.735	57	9	167	9	194	22.5	6.24	19.88	84.63	6.24	2.65	3.04	27.52	65.2	22.95	7.99	8.09	33.66	52.95	20.02	19.61	10.67	15.13	31.37	16.06	2.01	10.75	3	7	2	1	1	4	9	5	3	3	6	8	4	5
FALSE	High	Master Protein	A0A088A3R7	SHSP domain-containing protein OS=Apis mellifera OX=7460 GN=LOC724405 PE=3 SV=1		0	FALSE	67.792	66	10	70	10	193	22.4	5.5	7.44	13.85		0		21.93	6.89	2.99	5.15		18.59	11.14	2.75	13.61		17.14	11.66	5.62	9.94	0	3	3		2		6	4	1	7		4	2	1	5
FALSE	High	Master Protein	A0A088A3R9	SHSP domain-containing protein OS=Apis mellifera OX=7460 GN=LOC724488 PE=3 SV=1		0	FALSE	161.064	69	12	294	12	196	23	5.54	60.15	128.37	18.73	16.18	21.63	72.11	90.17	62.14	61.68	24.85	74.71	97.75	40.47	40.99	37.72	25.1	47.24	30.27	2.34	10.11	6	9	5	5	5	9	8	7	9	5	7	10	7	6
FALSE	High	Master Protein	A0A088A3R2	SHSP domain-containing protein OS=Apis mellifera OX=7460 PE=3 SV=1		0	FALSE	135.09	87	17	208	17	185	21.8	6.55	2.2	92.68	12.39	5.52		13.91	83.5	14.37	15.51	7.26	31.44	27.44	15.63	33.25	2.9	32.61	7.43	68.48	83.14	6.48	2	12	4	3		4	14	5	5	2	6	7	5	7
FALSE	High	Master Protein	A0A088A3R6	SHSP domain-containing protein OS=Apis mellifera OX=7460 PE=3 SV=1		0	FALSE	22.035	33	4	20	4	209	24.2	5.27	0	10.82				0	11.57	0		0	0	0					0				1	4				1	4	1		1	1	1
FALSE	High	Master Protein	A0A088A4I8	Sidoreflexin OS=Apis mellifera OX=7460 GN=LOC550915 PE=3 SV=1		0	FALSE	47.137	28	6	59	6	326	36.8	9.1	17.4	15.91	15.51	2.52	7.76	13.11	13.71	11.9		8.33	6.43	18.24	19.76	12.16	12.16						3	2	3	1	3	4	3	3		2	2	4	4	4
FALSE	High	Master Protein	A0A088A934	Signal peptidase complex catalytic subunit SEC11 OS=Apis mellifera OX=7460 GN=Spase18-21 PE=3 SV=1		0	FALSE	21.747	23	5	46	5	180	20.7	9.13	7.5	8.62	9.96	0	4.1	6.61	10.74	9.75		5.39	8.54	8.67	6.07	6.06	2.98		2.69	4.33	1.91	6.79	2	3	3	1	2	3	3	3		2	3	3	2	2
FALSE	High	Master Protein	A0A087ZPW9	Signal peptidase complex subunit 3 OS=Apis mellifera OX=7460 GN=Spase22-23 PE=3 SV=1		0.006	FALSE	2.857	6	1	1	1	179	20.3	7.24			1.86																				1
FALSE	High	Master Protein	A0A088AR84	Signal recognition particle subunit SRP68 OS=Apis mellifera OX=7460 GN=Srp68 PE=3 SV=1		0	FALSE	25.494	10	3	15	3	576	66.2	8.47	5.6		2.16	0	0	6.95	5.45	2.24				2.94		2.82			6.68	2.75			1		1	1	1	1	1	1				1		1
FALSE	High	Master Protein	A0A088A4L7	Signal recognition particle subunit SRP72 OS=Apis mellifera OX=7460 PE=3 SV=1		0	FALSE	21.629	12	5	9	5	630	71.4	8.7	0										2.14		2.49	2.63				9.44		0	1										1		1	1
FALSE	High	Master Protein	A0A088AEX7	Signal transducer and activator of transcription OS=Apis mellifera OX=7460 GN=STAT92E-like PE=3 SV=1		0	FALSE	23.124	7	4	35	4	824	92.8	6.79	7.45	6.35	2.6	2.26	2.81	13.62	7.32	3.77	0	3.04	11.51	8.68	3.96	11.54	4.61		4.04	3.3	2.08		1	1	1	1	1	2	1	1	1	1	2	1	1	2
FALSE	High	Master Protein	A0A088AN14	Skp1_POZ domain-containing protein OS=Apis mellifera OX=7460 GN=Elongin-C PE=3 SV=1		0	FALSE	20.588	21	2	4	2	145	16	4.51						2.72											3.07	7								1
FALSE	High	Master Protein	A0A088A041	Small nuclear ribonucleoprotein Sm D1 OS=Apis mellifera OX=7460 GN=LOC552559 PE=3 SV=1		0	FALSE	14.337	16	1	30	1	123	13.6	11.44	1.69	0	0			7.77	3.04	1.69		1.78	6.12	7.22	0	4.16							1	1	1			1	1	1		1	1	1	1	1
FALSE	High	Master Protein	A0A087ZMS5	Small nuclear ribonucleoprotein Sm D2 OS=Apis mellifera OX=7460 PE=3 SV=1		0	FALSE	5.929	17	2	4	2	110	12.5	9.99						2.12			1.93								2.12		1.82							1			1
FALSE	High	Master Protein	A0A087ZNX7	Small nuclear ribonucleoprotein Sm D3 OS=Apis mellifera OX=7460 GN=SmD3 PE=3 SV=1		0	FALSE	5.944	15	2	8	2	142	15.4	10.32		2.04			1.91						4.06	1.88	2.05	1.87	0							1			1						2	1	1	1
FALSE	High	Master Protein	A0A088A2F9	Small nuclear ribonucleoprotein-associated protein OS=Apis mellifera OX=7460 GN=Smb PE=3 SV=1		0.002	FALSE	4.058	4	1	12	1	217	22.7	11.08	2.25	2.4	2.15		2.23	4.8	2.38	2.74		2.42	2.13		2.47		0						1	1	1		1	1	1	1		1	1		1
FALSE	High	Master Protein	A0A088ACK1	Small ubiquitin-related modifier OS=Apis mellifera OX=7460 GN=LOC409308 PE=3 SV=1		0.001	FALSE	5.751	21	2	5	2	98	11.2	5.1						2.38											2.41	1.87	0	2						1
FALSE	High	Master Protein	H9KID5	Small ubiquitin-related modifier OS=Apis mellifera OX=7460 GN=smt3 PE=3 SV=1		0	FALSE	6.372	19	2	4	2	93	10.4	5.48						2.94			0		2.98					2.55										1			1		1
FALSE	High	Master Protein	A0A087ZZ04	SMB domain-containing protein OS=Apis mellifera OX=7460 GN=LOC409789 PE=3 SV=1		0	FALSE	324.218	70	31	1243	31	439	50.2	7.31	190.55	160.62	196.43	245.51	185.03	159.89	110.73	172.53	148.81	189.42	143.76	95.56	155.11	142.32	108.13	255.34	60.58	135.51	129.24	153.13	24	22	24	28	27	24	23	22	22	22	21	17	18	20
FALSE	High	Master Protein	A0A088A0G6	SMK-1 domain-containing protein OS=Apis mellifera OX=7460 GN=flfl PE=4 SV=1		0	FALSE	8.423	4	2	2	2	812	92.7	4.94						2.59											2.14									1
FALSE	High	Master Protein	A0A087ZTA6	Sodium/potassium-transporting ATPase subunit alpha OS=Apis mellifera OX=7460 PE=3 SV=1		0	FALSE	406.91	52	49	1004	49	1035	115.2	5.81	211.16	203.6	199.18	74.63	94.11	226.55	194.95	237.14	34.89	148.23	181.34	126.88	198.79	165.71	125.87	112.18	53.06	145.2	112.27	88.17	34	35	36	19	23	34	31	36	16	30	30	27	29	29
FALSE	High	Master Protein	A0A088ATA4	Sorting nexin OS=Apis mellifera OX=7460 PE=3 SV=1		0	FALSE	31.898	26	7	17	7	404	46.8	6.14	7.34				0	9.27					13.19	3.48				2.85	4.03		1.93	5.94	2				1	3					5	1
FALSE	High	Master Protein	A0A088ALU3	Spaetzle domain-containing protein OS=Apis mellifera OX=7460 PE=4 SV=1		0	FALSE	46.368	25	7	88	7	323	36.8	8.51	14.49	5.33		25.22	20.96	0	6.68	2.12	7.47	13.68	8.1	5.69	10.15	8.43	19.19	2.1	11.67	1.9	16.1	5.61	4	2		4	5	1	3	1	4	5	2	2	3	2
FALSE	High	Master Protein	A0A087ZWQ6	SPARC_Ca_bdg domain-containing protein OS=Apis mellifera OX=7460 GN=BM-40-SPARC PE=4 SV=1		0	FALSE	14.715	17	5	16	5	304	35.3	5.25		3.97				2.03	12.34	0			2.53	2.86	2.24	0		0				5.68		2				1	5	1			1	1	1	1
FALSE	High	Master Protein	A0A088ANZ7	Spectrin beta chain OS=Apis mellifera OX=7460 GN=beta-Spec PE=3 SV=1		0	FALSE	1650.97	71	148	3788	147	2401	277.6	5.71	795.72	760.08	487.01	403.45	437.46	819.53	728.19	685.34	356.28	632.75	790.06	607.66	703.72	673.67	450.73	607.8	674.35	602.96	529.22	272.29	110	100	98	86	92	107	106	101	85	101	103	97	100	98
FALSE	High	Master Protein	A0A088A9Y5	Sphingomyelin phosphodiesterase OS=Apis mellifera OX=7460 GN=727146 PE=3 SV=1		0.006	FALSE	2.942	2	1	7	1	699	80.2	6.49		0				0	0	0			0			0				0				1				1	1	1			1			1
FALSE	High	Master Protein	A0A088AP45	SRP54 domain-containing protein OS=Apis mellifera OX=7460 GN=Gtp-bp PE=4 SV=1		0	FALSE	12.704	6	2	7	2	614	69.3	8.5						2.8	7.3	2.26				0		0												2	2	1				1		1
FALSE	High	Master Protein	A0A087ZWG1	SSD domain-containing protein OS=Apis mellifera OX=7460 PE=4 SV=1		0	FALSE	49.363	11	13	46	13	1442	161.6	6.89	1.76	5.96	9.55			5.76	5.95	13.97		3.96	13.76	2.49	5.52	1.82	5.53	3.24	3.26	6.32	3.48	6.96	1	3	5			3	5	8		1	4	1	2	1
FALSE	High	Master Protein	A0A087ZQD4	Staphylococcal nuclease domain-containing protein OS=Apis mellifera OX=7460 GN=Tudor-SN PE=4 SV=1		0	FALSE	126.86	33	21	67	21	892	100.9	7.96	7.61		2.25			25.27	2.24				26.37	16.1	2.51	29.89	0	13.74	31.88	20.56	8.14	2.31	4		2			6	1				6	6	1	7
FALSE	High	Master Protein	A0A087ZRM4	STI1 domain-containing protein OS=Apis mellifera OX=7460 PE=4 SV=1		0	FALSE	27.582	38	4	9	4	151	16.9	8.28						2.28	0				6.67			1.8		2.34	4.46	2.67								1	1				2			1
FALSE	High	Master Protein	A0A087ZTD1	Str_synth domain-containing protein OS=Apis mellifera OX=7460 PE=4 SV=1		0	FALSE	56.853	21	11	151	11	564	63.1	9.09	15.89	20.88	22.09	3.38	4.65	27.75	26.69	28.46	1.71	10.24	29.6	21.33	22.88	26.89	11.48	18.2	10.82	19.69	13.61	10.52	5	5	8	2	3	8	8	6	1	3	8	7	6	7
FALSE	High	Master Protein	A5A5E4	Structural cuticle protein (Fragment) OS=Apis mellifera OX=7460 PE=2 SV=1		0	FALSE	114.886	82	4	2056	4	138	14.6	4.41	275.15	179.89	179.4	178.31	269.59	213.31	111.91	237.94	182.37	297.47	216.73	134.27	234.88	169.44	232.68	593.74	191.29	1095.66	690.02	1060.58	3	2	3	2	2	2	2	2	2	2	2	3	2	2
FALSE	High	Master Protein	A0A088AHL5	Structural maintenance of chromosomes protein OS=Apis mellifera OX=7460 GN=Cap PE=3 SV=1		0.002	FALSE	4.378	1	1	1	1	1202	139.4	8.27											2.09																				1
FALSE	High	Master Protein	A0A088A3W0	Succinate dehydrogenase [ubiquinone] cytochrome b small subunit OS=Apis mellifera OX=7460 GN=LOC725566 PE=3 SV=1		0	FALSE	10.569	31	4	31	4	201	22.3	9.32	1.8	5.2	1.82		0	1.61	1.74	3.52		1.84	1.68	0	1.76	0	1.7	0		0	0	4.62	1	2	2		1	1	1	1		1	1	1	2	1
FALSE	High	Master Protein	A0A088A6T4	Succinate dehydrogenase [ubiquinone] flavoprotein subunit, mitochondrial OS=Apis mellifera OX=7460 GN=SdhA PE=3 SV=1		0	FALSE	200.959	58	25	255	25	661	72.4	7.18	41.59	46.36	54.91	15.59	25.22	70.74	54.5	64.95	33.43	40.2	64.05	34.34	64.7	46.05	60.81	24.38	25.17	18.08	8.27	34.85	9	8	12	5	6	14	11	12	8	8	15	6	15	9
FALSE	High	Master Protein	A0A088AQ13	Succinate dehydrogenase [ubiquinone] iron-sulfur subunit, mitochondrial OS=Apis mellifera OX=7460 GN=LOC551169 PE=3 SV=1		0	FALSE	83.173	52	12	212	12	254	29	8.78	36.35	35.97	30.53	7.61	23.18	37.22	34.95	43.85	15.41	37.08	35.17	21.21	41.44	31.25	36.04	14.04	4.75	13.95	8.96	8.6	8	8	8	3	6	8	7	9	6	9	7	5	7	6
FALSE	High	Master Protein	A0A088ADV3	Succinate--CoA ligase [ADP/GDP-forming] subunit alpha, mitochondrial OS=Apis mellifera OX=7460 GN=Scsalpha PE=3 SV=1		0	FALSE	133.325	48	13	205	13	340	36	9	41.91	17.39	20.52	0		84.99	14.5	23.18	9.3		55.48	34.39	24.23	52.43	15.25	49.29	17.5	20.92	36.77	6.34	8	5	7	1		11	5	6	4		11	8	7	11
FALSE	High	Master Protein	A0A088ARY0	Succinate--CoA ligase [ADP-forming] subunit beta, mitochondrial OS=Apis mellifera OX=7460 PE=3 SV=1		0	FALSE	111.741	55	17	204	17	448	48.6	7.33	53.7	18.36	52.68	2.05	0	77.23	17.48	22.29	4.11		54.73	31.05	23	60.13	25.98	31.42	12.43	37.32	11.08	30.53	12	4	10	1	1	14	5	8	2		13	7	8	14
FALSE	High	Master Protein	A0A087ZSQ3	Succinyl-CoA:3-ketoacid-coenzyme A transferase OS=Apis mellifera OX=7460 GN=LOC409157 PE=3 SV=1		0	FALSE	37.342	28	8	22	8	541	58.9	5.57	3.29					9.84					0			0		5.02	3.95	2.34	3.62	8.78	1					5					2			1
FALSE	High	Master Protein	A0A088AUJ3	Sulfatase domain-containing protein OS=Apis mellifera OX=7460 GN=LOC552073 PE=4 SV=1		0	FALSE	9.146	4	2	3	2	546	61.1	6.89																			2.48	5.83
FALSE	High	Master Protein	A0A087ZZX7	Sulfatase domain-containing protein OS=Apis mellifera OX=7460 PE=4 SV=1		0	FALSE	13.239	8	3	15	3	528	60.1	7.84	4.28	5.3	3.35	5.2	5.48	4.23	3.63			8.86	4.05		4.07								1	2	1	1	2	1	1			3	1		1
FALSE	High	Master Protein	A0A088A700	SUN domain-containing protein OS=Apis mellifera OX=7460 PE=4 SV=1		0	FALSE	15.344	9	5	9	5	737	86.7	8.29				0	0	0		2.8			3.04		2.5			0								1	1	1		2			2		1
FALSE	High	Master Protein	Q7YXM6	Superoxide dismutase [Cu-Zn] OS=Apis mellifera ligustica OX=7469 GN=Sod1 PE=2 SV=1		0	FALSE	51.068	47	7	63	7	152	15.6	6.71	6.9	18.87				31.85	7.26	13.27			8.64	13.94		7.56	2.96		20.04	14.3	5.12	15.36	3	4				7	3	4			3	3		3
FALSE	High	Master Protein	A0A088A1K0	Superoxide dismutase OS=Apis mellifera OX=7460 GN=Sod2 PE=3 SV=1		0	FALSE	48.697	32	6	68	6	218	24.5	9.04	20.45	17.71	13.89			32.47	9.64	5.69	3.73		14.27	12.51	3.32	22.02	16.45	11.8	3.98	2.91		8.19	3	3	3			6	2	1	2		3	3	1	4
FALSE	High	Master Protein	A0A088AFD4	SWIB domain-containing protein OS=Apis mellifera OX=7460 GN=LOC408520 PE=4 SV=1		0	FALSE	80.718	50	11	121	11	261	29.2	7.83	13.89	25.18	20.41	12.39	7.93	21.37	36.97	24.05	13.28	8.37	29.64	12.64	8.62	21.66	16.4	31.4	9.75	19.45	0	5.18	4	5	5	3	1	4	7	6	4	1	5	2	2	3
FALSE	High	Master Protein	A0A088A062	Synaptosomal-associated protein OS=Apis mellifera OX=7460 PE=3 SV=1		0	FALSE	18.485	29	3	7	3	162	18.1	4.89																3.8	4	6.34	3.06	5.81
FALSE	High	Master Protein	A0A088ARZ3	Syndecan OS=Apis mellifera OX=7460 PE=3 SV=1		0	FALSE	9.418	15	2	4	2	212	23.3	4.58								0			5.4	3.7																1			2	1
FALSE	High	Master Protein	A0A087ZVJ2	TACC_C domain-containing protein OS=Apis mellifera OX=7460 PE=4 SV=1		0.001	FALSE	5.667	2	2	4	2	948	106.5	4.63						2.22					0						2.2	1.61								1					1
FALSE	High	Master Protein	A0A088A0K5	Tafazzin family protein OS=Apis mellifera OX=7460 PE=3 SV=1		0	FALSE	5.884	17	2	3	2	284	33	9.47	0		0																		1		2
FALSE	High	Master Protein	Q5XUU6	Take-out-like carrier protein JHBP-1 OS=Apis mellifera OX=7460 PE=2 SV=1		0	FALSE	257.097	72	27	889	27	253	29.2	8.32	178.11	74.38	140.02	86.88	68.64	111.47	56.35	80.02	124.97	19.77	81.32	66.19	67.15	114.22	60.35	242.08	33.33	83.4	211.36	183.68	20	13	21	15	13	16	12	13	21	6	12	14	12	15
FALSE	High	Master Protein	A0A088AVZ9	T-complex protein 1 subunit alpha OS=Apis mellifera OX=7460 GN=LOC409134 PE=3 SV=1		0	FALSE	113.214	39	18	131	18	557	59.9	5.91	14.55	27.55	3.18		0	46.32	27.61	10.72			64.65	16.9	9.18	34.15	3.75	20.7	15.18	14.49	19.66	17.76	4	7	2		2	10	7	2			15	6	2	9
FALSE	High	Master Protein	A0A088AHM7	T-complex protein 1 subunit delta OS=Apis mellifera OX=7460 GN=LOC551275 PE=3 SV=1		0	FALSE	107.893	44	17	146	17	534	57.3	7.42	32.26	32.15	6.93	0	7.35	59.16	38.94	16.58	0	2.34	52.66	30.88	18.76	34.79	7.36	16.28	11.48	10.87	5.9	6.51	6	9	3	3	3	14	7	4	1	2	9	5	4	9
FALSE	High	Master Protein	A0A087ZUG4	T-complex protein 1 subunit eta OS=Apis mellifera OX=7460 GN=Tcp-1eta PE=3 SV=1		0	FALSE	114.139	47	19	119	19	542	59.9	6.42	14.42	19.18			2.68	47.78	28.45	6.15		1.94	55.9	15.01	2.27	24.66	1.98	4.75	22.82	17.94	5.62	5.78	4	5			2	11	9	2		2	14	3	2	6
FALSE	High	Master Protein	A0A088A3C0	T-complex protein 1 subunit gamma OS=Apis mellifera OX=7460 GN=Cctgamma PE=3 SV=1		0	FALSE	111.197	39	18	126	18	550	61	6.57	18.59	25.88	5.15	2.8	2.89	54.82	34.87	20.19	4.44	5.38	50.41	19.67	3.21	29	12.72	10.3	5.69	12.71	17.37	9.72	7	6	1	1	1	14	11	7	2	2	12	5	1	8
FALSE	High	Master Protein	A0A087ZVC8	TCTP domain-containing protein OS=Apis mellifera OX=7460 GN=Tctp PE=3 SV=1		0	FALSE	34.73	59	6	29	6	172	19.8	4.7						9.94	3.51				10.34	1.63		0		8.42	13.08	1.83		20.04						3	2				4	1		1
FALSE	High	Master Protein	A0A088AV46	Tetraspanin OS=Apis mellifera OX=7460 GN=102656585 PE=3 SV=1		0	FALSE	22.136	22	5	54	5	264	29.3	7.33	5.26	4.51	10.77	6.05	2.11	7.14	4.42	7.12	3.51	9.09	8.14	11.62	5.11	7.58	11.65	6.86	2.5	2.51	2.22	2.31	2	2	3	2	1	2	2	3	2	3	3	4	3	3
FALSE	High	Master Protein	A0A088AUG1	Tetraspanin OS=Apis mellifera OX=7460 GN=Tspan13 PE=3 SV=1		0	FALSE	19.831	16	4	48	4	238	26.2	7.72	0	1.44	2.11	0	4.23	4.81	1.46	7.09	0	2.16	2.02	3.95	0	2.18	2.05	3.96			6.17	6.12	1	2	1	1	2	2	2	2	1	1	1	3	1	1
FALSE	High	Master Protein	A0A088ASL1	Tetraspanin OS=Apis mellifera OX=7460 GN=Tspan9 PE=3 SV=1		0	FALSE	35.43	34	5	24	5	267	28.5	5.05			5.79	4.84	6.04	6.92	9.62	4.09		4.25		7.42	7.55	9.95	9.47			4.44		4.94			2	1	2	2	3	1		2		2	2	2
FALSE	High	Master Protein	Q9NB07	Tetraspanin OS=Apis mellifera OX=7460 PE=2 SV=1		0	FALSE	10.239	10	2	50	2	232	25.3	6.7	7.4	11.5	9.14	0	1.79	0	6.46	6.92		1.66	7.81	7.29	3.34	6.52	4.63	3.92		3.44	1.76	3.35	2	2	2	1	1	1	2	2		1	2	2	1	2
FALSE	High	Master Protein	A0A088AJI0	TFCD_C domain-containing protein OS=Apis mellifera OX=7460 PE=4 SV=1		0.002	FALSE	4.132	2	1	1	1	1130	128.8	6.29						0																				1
FALSE	High	Master Protein	A0A088AKR6	TGc domain-containing protein OS=Apis mellifera OX=7460 GN=LOC409425 PE=4 SV=1		0	FALSE	192.12	66	29	233	29	713	80.6	5.01	21.01	35.42	13.6	5.63	6.05	73.07	39.55	48.72	11.76	30.36	67.44	39.33	34.66	48.45	20.67	55.53	23.13	51.24	17.56	42.54	6	11	5	2	3	17	14	13	3	8	21	11	9	13
FALSE	High	Master Protein	A0A087ZQT4	TGS domain-containing protein OS=Apis mellifera OX=7460 GN=100576663 PE=4 SV=1		0.002	FALSE	4.435	7	2	3	2	329	37.5	8.66		0											0			0						1											1
FALSE	High	Master Protein	A0A088AEC7	ThiF domain-containing protein OS=Apis mellifera OX=7460 GN=Aos1 PE=4 SV=1		0.002	FALSE	4.129	4	1	1	1	334	37.7	6.27																1.95
FALSE	High	Master Protein	A0A088AGN1	ThiF domain-containing protein OS=Apis mellifera OX=7460 PE=4 SV=1		0	FALSE	6.107	12	1	2	1	130	14.2	4.94						2.25					2.17															1					1
FALSE	High	Master Protein	A0A087ZSW3	Thioredoxin domain-containing protein OS=Apis mellifera OX=7460 GN=726314 PE=4 SV=1		0	FALSE	12.774	11	3	7	3	285	33.1	8.63								2.73					2.62					2.85	4.37	5.09								1					1
FALSE	High	Master Protein	A0A088AS52	Thioredoxin domain-containing protein OS=Apis mellifera OX=7460 GN=LOC411255 PE=4 SV=1		0	FALSE	55.648	42	10	85	10	296	34.2	6.27	18.14	21.21	18.68	1.81	4.07	25.84	23.55	19.15	0	9.32	19.85	10.98	23.39	16.26	15.53	2.26	1.84	4.38			5	6	7	1	3	4	5	5	1	3	3	4	7	5
FALSE	High	Master Protein	A0A087ZY71	Thioredoxin domain-containing protein OS=Apis mellifera OX=7460 GN=LOC411391 PE=4 SV=1		0	FALSE	9.577	10	3	17	3	268	31.1	9.22	1.95	5.71				4.09	1.91	3.75		1.85	2.29		2.24	1.92	2.04						1	3				2	2	2		2	2		1	1
FALSE	High	Master Protein	A0A087ZND2	Thioredoxin domain-containing protein OS=Apis mellifera OX=7460 GN=Tpx-1 PE=4 SV=1		0	FALSE	109.809	71	15	133	15	194	21.8	5.97	33.42	28.88	5.39	5.53	5.21	55.78	24.17	8.7	11.07	2.88	36.94	26.25	0	26.19	2.75	37.71	16.06	20.67	13.48	23.88	8	7	2	2	2	11	6	2	5	1	8	5	1	7
FALSE	High	Master Protein	A0A087ZRJ5	Thioredoxin domain-containing protein OS=Apis mellifera OX=7460 GN=Tpx-4 PE=4 SV=1		0	FALSE	261.104	90	19	1192	19	220	25.1	6.34	162.95	122.59	82.49	42.03	16	222.52	76.7	76.11	71.96	19.98	224.26	143.05	64.65	176.73	60.06	728.42	176.96	475.75	262.1	260.51	14	13	12	12	7	14	12	13	12	7	15	13	12	13
FALSE	High	Master Protein	A0A088AKM8	Thioredoxin domain-containing protein OS=Apis mellifera OX=7460 GN=Tpx-5 PE=4 SV=1		0	FALSE	18.558	36	6	10	6	220	24.9	5.48						1.89					2.44					5.94	2.65	2.24		4.24						1					1
FALSE	High	Master Protein	A0A088AA01	Thioredoxin domain-containing protein OS=Apis mellifera OX=7460 GN=Trx1-like3 PE=4 SV=1		0	FALSE	14.055	8	3	9	3	427	49.3	5.8											6.14	2.56	0	0		1.97		1.91													2	1	1	1
FALSE	High	Master Protein	A0A088ABX7	Thioredoxin domain-containing protein OS=Apis mellifera OX=7460 PE=4 SV=1		0	FALSE	63.17	33	8	137	8	291	33.4	6.28	24.28	29.04	18.82	2.28	7.49	28.09	32.47	31.54	6.06	16.5	30.2	26.95	27.21	18.4	22.11	12.6	8.15	17.88	6.56	3.77	6	6	5	2	3	6	6	6	5	6	5	6	6	5
FALSE	High	Master Protein	A0A088AM69	Thioredoxin OS=Apis mellifera OX=7460 GN=Trx-1 PE=3 SV=1		0	FALSE	9.891	38	3	4	3	136	15.2	8.43						0											0			2.47						1
FALSE	High	Master Protein	A0A088AAY9	Thioredoxin OS=Apis mellifera OX=7460 GN=Trx-2 PE=3 SV=1		0	FALSE	33.167	62	5	25	5	105	12	4.92			2.32			9.91	3.03	2.18	5.2		3.73	4.9				1.85	14.74		0	14.42			1			3	1	1	3		1	2
FALSE	High	Master Protein	Q7YXM3	Thioredoxin peroxidase OS=Apis mellifera ligustica OX=7469 GN=Tpx-3 PE=2 SV=1		0	FALSE	41.174	37	7	41	7	242	27.2	8.82	27.35		3.94	3.06		17.2			5.73		11.53		2.79	10	2.78	3.58	0	6.34	7.59	9.97	6		1	1		6			2		3		1	4
FALSE	High	Master Protein	Q7YXM4	Thioredoxin reductase OS=Apis mellifera ligustica OX=7469 GN=Trxr-1 PE=2 SV=1		0	FALSE	42.204	23	8	22	8	485	53.2	7.33		5.43				21.84	4.56	3.1			7.52	7.35		3.97	2.48		3.24		2.44	8.99		2				6	2	1			2	2		1
FALSE	High	Master Protein	A0A088AK34	Thymidylate_kin domain-containing protein OS=Apis mellifera OX=7460 GN=LOC552148 PE=3 SV=1		0.001	FALSE	4.54	7	1	4	1	214	24.2	6.93						1.7	0				1.77						0									1	1				1
FALSE	High	Master Protein	A0A088ARY2	TIP120 domain-containing protein OS=Apis mellifera OX=7460 GN=LOC409918 PE=4 SV=1		0	FALSE	64.235	17	15	53	15	1235	138.7	5.74	1.83	8.71		0	0	15.55	5.81	1.86		2.46	29.3	11.39	3.97	10.21	0		4.59	2.1	1.67	2.08	1	3		1	2	6	2	1		2	10	5	2	7
FALSE	High	Master Protein	A0A088AHG7	TLC domain-containing protein OS=Apis mellifera OX=7460 GN=LOC410172 PE=4 SV=1		0	FALSE	9.288	8	2	2	2	377	43.3	9.58																		5.25
FALSE	High	Master Protein	A0A088AQ11	TOG domain-containing protein OS=Apis mellifera OX=7460 GN=LOC551331 PE=4 SV=1		0	FALSE	16.56	4	3	11	3	1315	147.6	7.01	2.7	2.62				7.79	2.8				3.36			1.65			3.93				1	1				3	1				2			1
FALSE	High	Master Protein	A0A087ZRD4	TOG domain-containing protein OS=Apis mellifera OX=7460 PE=4 SV=1		0	FALSE	18.208	6	5	8	5	1069	119.8	4.74	0					1.82					2.45			0					2.28	2.79	2					2					1			1
FALSE	High	Master Protein	A0A088ARK1	TPR_MLP1_2 domain-containing protein OS=Apis mellifera OX=7460 PE=4 SV=1		0	FALSE	19.899	3	4	4	4	2314	262.1	5.06																	4.11	3.03		6.55
FALSE	High	Master Protein	A0A087ZYR8	TPR_REGION domain-containing protein OS=Apis mellifera OX=7460 GN=102656934 PE=4 SV=1		0	FALSE	15.224	9	4	6	4	539	61.5	6.81						3.79					1.86					8.92			0							1					1
FALSE	High	Master Protein	A0A088AR75	TPR_REGION domain-containing protein OS=Apis mellifera OX=7460 GN=LOC408464 PE=4 SV=1		0	FALSE	11.896	8	2	5	2	459	50.7	4.56						3.06					0							0								2					1
FALSE	High	Master Protein	A0A088ATH4	TPR_REGION domain-containing protein OS=Apis mellifera OX=7460 GN=LOC411882 PE=4 SV=1		0.002	FALSE	4.005	8	2	7	2	289	33.8	6.99						0	2.08	1.8		0			1.6				2.69									1	1	2		1			1
FALSE	High	Master Protein	A0A088A098	TPR_REGION domain-containing protein OS=Apis mellifera OX=7460 GN=PpD3 PE=4 SV=1		0	FALSE	7.787	11	3	3	3	489	56	6						0					0															2					1
FALSE	High	Master Protein	A0A088A7V2	TPR_REGION domain-containing protein OS=Apis mellifera OX=7460 GN=Sgt PE=4 SV=1		0.002	FALSE	3.928	3	1	4	1	299	32.8	5.17						2.35	2.16				2.15			0												1	1				1			1
FALSE	High	Master Protein	A0A088A423	TPR_REGION domain-containing protein OS=Apis mellifera OX=7460 GN=Tom70 PE=4 SV=1		0	FALSE	14.416	7	3	4	3	576	65.3	6.74								2.7										5.98		2.78								1
FALSE	High	Master Protein	A0A088AGS1	TPR_REGION domain-containing protein OS=Apis mellifera OX=7460 PE=4 SV=1		0	FALSE	66.031	18	13	45	13	1028	117.8	9.99	12.78	5.14		0	2.07	13.61		4.3	2.34	7.59	11.41		5.65	5.1		12.15	17.5	10.46	2.17		5	2		1	1	4		2	1	3	3		2	2
FALSE	High	Master Protein	A0A087ZRM3	TPR_REGION domain-containing protein OS=Apis mellifera OX=7460 PE=4 SV=1		0	FALSE	20.338	23	4	8	4	243	27.4	4.5						1.79			0		2.87					3.24	8.76		2.88							1			1		1
FALSE	High	Master Protein	A0A088ASE7	TPR_REGION domain-containing protein OS=Apis mellifera OX=7460 PE=4 SV=1		0	FALSE	54.043	11	9	46	9	1006	115.4	7.27	2.01	7.78				29.59	4.61	3.96			16.28	10.81	0	7.16		1.62	5.58	4.76	0	5.36	1	2				8	1	1			6	3	1	3
FALSE	High	Master Protein	A0A087ZPV0	Transaldolase OS=Apis mellifera OX=7460 PE=3 SV=1		0	FALSE	63.218	49	12	59	12	332	37.2	8.03	16.7	8.29				22.25		2.16			21.24	4.91		7.68		20.72	3.84	10	10.11	12.02	5	3				7		1			8	3		3
FALSE	High	Master Protein	A0A088A2T5	Transcription factor BTF3 OS=Apis mellifera OX=7460 PE=3 SV=1		0	FALSE	18.117	33	3	9	3	156	16.9	8.1	3.18	13.41				7.09		3.48									8.25				1	2				1		1
FALSE	High	Master Protein	Q86PH6	Transferrin OS=Apis mellifera OX=7460 GN=trf PE=2 SV=1		0	FALSE	43.87	21	11	16	11	712	78.6	7.06	2.81					7.04			0		8.09		9.08			5.11				4.69	2					2			2		3		3
FALSE	High	Master Protein	A0A088AJ47	Transgelin OS=Apis mellifera OX=7460 GN=Chd64 PE=3 SV=1		0	FALSE	82.482	78	11	85	11	188	20.8	8.41	11.62	16.32	3.45		5.29	36.03	22.15	9.71	13.04		20.69	7.72	0	14.1	2.87	13.27	45.24	5.39			3	3	1		2	8	4	4	4		6	3	1	4
FALSE	High	Master Protein	A0A088ASZ6	Transgelin OS=Apis mellifera OX=7460 GN=Mp20 PE=3 SV=1		0	FALSE	231.323	77	24	543	17	184	20.5	8.66	154.56	108.23	34.07	40.87	20.88	256.47	83.54	65.19	100.97	12.96	218.71	54.02	16.82	115.77	20.28	181.89	61.22	9.3	19.02	14.78	13	10	6	10	5	17	10	10	14	3	18	10	5	15
FALSE	High	Master Protein	A0A087ZNF1	Transgelin OS=Apis mellifera OX=7460 PE=3 SV=1		0	FALSE	102.102	54	11	252	4	121	13.1	9.54	100.91	63.14	16.65	16.04	4.89	187.29	46.96	25.32	42.52		104.58	23.91	2.88	51.38	5.71	46.86	42.63	2.96	6.13	6.07	6	5	3	6	2	9	4	4	9		6	4	1	5
FALSE	High	Master Protein	A0A088A372	Transglut_N domain-containing protein OS=Apis mellifera OX=7460 PE=4 SV=1		0	FALSE	20.686	17	3	13	3	241	27.4	6.55	4.51				3.38	4.79	4.32	4.25	3.28	8.04			5.01	4.77	7.48					2.36	1				1	1	1	1	1	2			1	1
FALSE	High	Master Protein	A0A088A461	Transient receptor potential cation channel protein painless OS=Apis mellifera OX=7460 GN=Pain PE=2 SV=1		0	FALSE	11.408	5	3	16	3	892	102.6	7.12			0			3.48	3.83	6.37		0	2.97	6.1	4.73	2.62									1			2	1	1		1	1	1	2	1
FALSE	High	Master Protein	A0A088AUY4	Transket_pyr domain-containing protein OS=Apis mellifera OX=7460 GN=LOC550804 PE=4 SV=1		0	FALSE	182.274	55	23	234	23	622	67.4	7.74	17.91	90.67	12.84	0	0	115.5	64.84	45.13	4.1	8.88	97.43	83.9	23.65	30.33	0	23.25	12.03	36.32	6.53	37.5	5	16	5	1	1	18	11	8	3	3	15	13	7	7
FALSE	High	Master Protein	A0A088AHH8	Transket_pyr domain-containing protein OS=Apis mellifera OX=7460 PE=4 SV=1		0	FALSE	285.494	46	37	376	37	1121	126.5	8.09	96.42	37.58	44.85	4.62	13.73	160.29	39.1	38.65	19.42	22.88	117.01	64.2	54.66	85.65	40.7	64.82	20.61	39.38	44.68	44.24	18	11	13	2	5	30	13	12	8	9	20	18	14	17
FALSE	High	Master Protein	A0A088AJ89	Translocon-associated protein subunit beta OS=Apis mellifera OX=7460 GN=SsRbeta PE=3 SV=1		0.003	FALSE	3.363	6	1	1	1	191	21.9	7.14																			0
FALSE	High	Master Protein	A0A087ZPI0	TRASH domain-containing protein OS=Apis mellifera OX=7460 GN=RpL24 PE=4 SV=1		0	FALSE	27.011	36	6	100	6	154	17.5	10.98	14.84	12.89	9.42	12.48	12.77	11.25	13.4	16.01	6.39	15.39	17.25	9.67	16.17	15.13	14.33	4.89	6.02	11.4	3.08		5	3	4	4	5	5	3	4	1	5	4	3	4	4
FALSE	High	Master Protein	A0A088AUT8	Trehalase OS=Apis mellifera OX=7460 GN=LOC410795 PE=3 SV=1		0	FALSE	18.901	10	4	21	4	662	77.2	6.19	2.47	1.94	2.61			2.32	7.15	2.36		0	0		1.94	4.17			1.79				1	1	2			2	3	2		2	1		2	2
FALSE	High	Master Protein	A4ZXC4	Triosephosphate isomerase OS=Apis mellifera OX=7460 GN=Tpi PE=2 SV=1		0	FALSE	100.609	80	15	117	15	247	26.9	8.05	9.25	15.27		12.4	1.72	67.53	10.79	7.76	10.72		39.5	16.95		15.68		21.58	43.94	7.02	8.64	20.61	3	4		5	1	12	3	3	4		10	7		6
FALSE	High	Master Protein	A0A088AKU7	tRNA pseudouridine synthase OS=Apis mellifera OX=7460 PE=4 SV=1		0.002	FALSE	3.668	3	1	1	1	389	45.6	8.06						1.75																				1
FALSE	High	Master Protein	A0A088AEZ6	tRNA-synt_1g domain-containing protein OS=Apis mellifera OX=7460 PE=3 SV=1		0.003	FALSE	3.526	3	1	1	1	778	91.3	8.7						2.64																				1
FALSE	High	Master Protein	I7LRF0	Troponin C type I OS=Apis mellifera OX=7460 GN=TpnCI PE=4 SV=1		0	FALSE	175.19	63	18	467	18	145	16.8	4.27	55.61	167.03	32.03	27.79	26.81	62.96	91.93	50.05	56.88	51.33	38	28.42	40.24	30.02	64.64	25.46	134.56	28.08	12.67	248.28	12	15	8	4	6	12	13	11	11	10	9	7	8	7
FALSE	High	Master Protein	A0A088A1R8	Troponin C type IIa OS=Apis mellifera OX=7460 PE=4 SV=1		0	FALSE	6.832	26	2	5	2	150	16.7	4.17		3.12				0	2.96		2.18											0		1				1	1		1
FALSE	High	Master Protein	I7LST5	Troponin C type IIb OS=Apis mellifera OX=7460 GN=TpnCIIb PE=4 SV=1		0	FALSE	34.44	41	5	18	5	148	17	4.42	2.19	9.58					15.54		2.29							3.03	8.27	4.54		5.95	1	3					5		1
FALSE	High	Master Protein	I7KJQ1	Troponin C type IIIa OS=Apis mellifera OX=7460 GN=TpnCIIIa PE=4 SV=1		0	FALSE	103.301	52	10	127	10	153	17.3	4.17	12.12	40.4	22.79	2.56	0	21.61	35.8	14.82	44.15	26.11	10.39	14.04	7.43	10.89	13.11	3.93	16.62	7.2	3.49	34	3	6	5	1	2	5	6	4	6	5	3	5	3	2
FALSE	High	Master Protein	Q3B709	Troponin H isoform 1 OS=Apis mellifera OX=7460 GN=TpnH PE=4 SV=1		0	FALSE	86.53	20	13	407	0	430	45.2	5.16	51.57	75.11	48.31	35.55	37.6	50.98	60.93	58.92	48.59	52.54	24.32	30.05	38.62	23.61	34.07	38.91	32.77	44.28	24.69	1.75	11	12	10	9	8	12	11	10	12	11	8	7	10	7
FALSE	High	Master Protein	Q3B708	Troponin I isoform 6a1 OS=Apis mellifera OX=7460 GN=TpnI PE=4 SV=1		0	FALSE	149.071	42	17	942	6	212	25.4	9.72	128.93	271.4	117.63	94.16	96.18	120.98	229.21	125.79	137.75	136.86	64.82	59.89	107.56	64.51	104.93	106.5	164.77	179.96	91.98	13.84	13	14	12	13	12	14	14	12	14	13	11	10	12	9
FALSE	High	Master Protein	Q3B705	Troponin I isoform 6b1 OS=Apis mellifera OX=7460 GN=TpnI PE=4 SV=1		0	FALSE	70.558	40	11	340	0	204	24.6	9.69	41.26	61.06	41.12	28.61	27.8	41.48	47.53	48.73	45.11	42.73	16.22	20.51	31.33	19.2	26.99	27.22	19.37	30.34	20.21	1.75	9	10	9	9	7	10	10	8	11	9	6	5	8	6
FALSE	High	Master Protein	Q3B706	Troponin I isoform 6b2 OS=Apis mellifera OX=7460 GN=TpnI PE=4 SV=1		0	FALSE	65.316	43	11	294	3	204	24.4	9.8	23.78	55.84	37.24	24.89	26.98	35.17	43.71	42.43	52.35	40.82	15.56	13.29	28.75	19.34	23.62	12.12	27.66	20.32	13.23	1.75	6	10	9	9	7	9	10	7	11	8	6	4	7	6
FALSE	High	Master Protein	Q3B714	Troponin T isoform 3 OS=Apis mellifera OX=7460 GN=TpnT PE=4 SV=1		0	FALSE	315.919	48	30	1346	30	395	47.6	4.69	215.55	350.75	207.13	110.22	118.65	232.89	266.25	190.02	226.32	208.14	162.92	143.1	183.26	127.27	183	172.72	254.26	175.3	61.06	35.38	20	25	20	17	18	24	26	21	24	19	20	18	20	19
FALSE	High	Master Protein	A0A088ACC0	TROVE domain-containing protein OS=Apis mellifera OX=7460 GN=LOC724212 PE=4 SV=1		0	FALSE	17.02	6	3	7	3	546	62.1	9.1	0					2.53	2.33				3.05					5.3					1					2	1				1
FALSE	High	Master Protein	A0A088AIB2	Tr-type G domain-containing protein OS=Apis mellifera OX=7460 GN=eIF5B PE=4 SV=1		0.001	FALSE	5.351	3	2	2	2	1050	119.1	6.11						0											2.46									1
FALSE	High	Master Protein	A0A088A152	Tr-type G domain-containing protein OS=Apis mellifera OX=7460 GN=Elf PE=4 SV=1		0.002	FALSE	3.606	4	1	1	1	598	65.9	5.59																			0
FALSE	High	Master Protein	A0A088A5X7	Tr-type G domain-containing protein OS=Apis mellifera OX=7460 GN=LOC409167 PE=4 SV=1		0	FALSE	196.895	46	28	162	28	844	94.5	6.52	9.58	16.35	4.36	0		99.25	26.53	6.42	7.29	5.83	87.02	38.16	11.79	34.17	2.96	23.16	40.17	15.66	10.75	6.94	3	6	3	1		20	6	2	5	3	22	9	3	9
FALSE	High	Master Protein	A0A088AA44	Tr-type G domain-containing protein OS=Apis mellifera OX=7460 GN=LOC410414 PE=4 SV=1		0	FALSE	25.309	9	6	20	6	980	110.3	5.4	3.61	3.97	2.03			12.38	2.8	4.9		2.39	3.69	4.08	0	3.57		1.99					1	1	1			3	1	3		1	1	2	1	1
FALSE	High	Master Protein	A0A088A9P5	t-SNARE coiled-coil homology domain-containing protein OS=Apis mellifera OX=7460 GN=Syx7 PE=3 SV=1		0	FALSE	15.747	17	3	13	3	271	30.7	8.12	6.03	2.85			1.83	8.84	3.7	2.52		2.56	2.87			2.68				3.07			2	1			1	3	1	1		1	1			1
FALSE	High	Master Protein	A0A087ZW55	t-SNARE coiled-coil homology domain-containing protein OS=Apis mellifera OX=7460 PE=3 SV=1		0	FALSE	14.524	18	3	14	3	331	38	5.4	2.55					5.38	0	0			2.19			0		2.16	5.33		0	0	1					1	1	1			1			1
FALSE	High	Master Protein	A0A088AKL6	Tubulin alpha chain OS=Apis mellifera OX=7460 GN=LOC408388 PE=3 SV=1		0	FALSE	367.072	80	28	1745	2	450	49.9	5.14	163.18	290.37	212.17	77.2	73.21	290.22	277.62	206.21	74.51	81.6	343.94	294.01	166.6	277.92	129	611.7	156.36	646.63	120.16	783.34	18	21	21	12	13	23	22	20	14	14	23	18	16	21
FALSE	High	Master Protein	A0A088ANF0	Tubulin alpha chain OS=Apis mellifera OX=7460 GN=LOC411519 PE=3 SV=1		0	FALSE	115.258	24	8	591	1	448	50.4	5.43	47.8	123.18	79.1	30.4	26.47	97.54	135.22	72.51	24.39	28.47	149.31	130.62	62.07	123.52	45.66	114.32	51.91	155.2	42.96	229.04	5	8	7	5	5	7	7	6	6	5	8	6	5	8
FALSE	High	Master Protein	A0A088A436	Tubulin alpha chain OS=Apis mellifera OX=7460 GN=LOC550827 PE=3 SV=1		0	FALSE	352.148	80	28	1736	2	450	49.9	5.14	152.42	287.62	202.2	77.2	73.21	267.98	265.97	200.42	70.96	81.6	318.32	272.19	164.7	272.4	122.78	592.29	150.32	663.74	124.62	848.99	17	21	21	12	13	22	22	20	13	14	23	18	16	21
FALSE	High	Master Protein	A0A088ATP8	Tubulin alpha chain OS=Apis mellifera OX=7460 PE=3 SV=1		0	FALSE	123.893	21	10	565	2	480	53.6	5.38	63.16	142.8	95.37	36.94	35.33	96.48	142.26	91.47	22.28	31.52	156.06	124.97	75.57	130.81	52.79	113.91	45.61	129.2	19.86	129.22	6	8	6	5	6	6	7	7	4	5	7	6	6	6
FALSE	High	Master Protein	Q86ZW8	Tubulin beta chain (Fragment) OS=Antonospora locustae OX=278021 GN=btub PE=3 SV=1		0	FALSE	56.104	12	6	561	1	387	43	6.24	58.57	81.27	65.31	35.18	30.73	81.49	71.31	61.88	39.47	25.42	92.9	76.29	47.67	83.33	43.95	70.3	21.1	179.93	92.51	232.55	6	6	6	5	5	6	6	6	5	5	5	5	5	5
FALSE	High	Master Protein	A0MP00	Tubulin beta chain (Fragment) OS=Nosema sp. BZ-2006a OX=409308 PE=3 SV=1		0	FALSE	21.665	8	3	184	1	277	30.8	7.28	21.51	29.26	24.57	10.05	11.59	29.13	23.67	24.01	9.05	11.03	32.77	32.08	15.66	25.18	19.09	27.67	13.03	28.01	28.66	38.04	2	3	3	1	1	2	3	2	1	1	2	2	2	2
FALSE	High	Master Protein	A0A087ZYZ1	Tubulin beta chain OS=Apis mellifera OX=7460 GN=LOC408782 PE=3 SV=1		0	FALSE	526.089	83	31	2524	9	447	50.1	4.86	276.64	380.32	287.35	143.64	130.77	459.18	413.61	320.21	175.03	137.7	496.58	396.05	253.72	389.46	190.23	954.75	296.35	918.3	371.73	1032.32	24	24	25	18	17	28	28	28	22	19	27	26	23	25
FALSE	High	Master Protein	A0A087ZSC1	Tubulin beta chain OS=Apis mellifera OX=7460 GN=LOC410559 PE=3 SV=1		0	FALSE	210.457	36	17	1110	2	447	49.9	4.89	133.24	162.5	126.1	85.18	70.58	211.15	184.99	154.7	82.74	67.06	196.92	183.16	113.15	160.95	85.26	410.93	132.81	262.6	148.41	352.44	14	13	13	11	9	15	15	15	13	12	13	13	12	12
FALSE	High	Master Protein	A0A087ZYZ2	Tubulin beta chain OS=Apis mellifera OX=7460 GN=LOC410994 PE=3 SV=1		0	FALSE	223.149	43	17	1185	2	455	51	4.86	116.35	144.97	130.12	70.53	61.62	188.96	171.98	137.38	78.8	68.6	208.84	162.35	103.36	145.17	79.35	393.92	128.59	426.71	190.62	531.56	12	12	13	11	8	15	15	14	12	10	14	13	12	13
FALSE	High	Master Protein	A0A088ACY5	Tubulin gamma chain OS=Apis mellifera OX=7460 GN=TUBG1 PE=3 SV=1		0	FALSE	6.473	5	2	2	2	453	51.3	6.18						2.23					2.35															1					1
FALSE	High	Master Protein	B8XIJ0	Tweedle motif cuticular protein 1 (Fragment) OS=Apis mellifera OX=7460 GN=Twld1 PE=2 SV=1		0	FALSE	132.315	26	5	1178	4	331	30.5	9.23	164.84	198.95	120.78	239.18	227.44	56.56	91.17	92.04	28.9	138.88	151.94	100.55	209.04	183.13	166.9	215.54	64	461.35	191.89	391.25	5	5	5	5	5	4	5	5	4	5	5	5	5	5
FALSE	High	Master Protein	E2IFU8	Tweedle motif cuticular protein 2 (Fragment) OS=Apis mellifera OX=7460 GN=Twdl2 PE=2 SV=2		0	FALSE	52.715	52	6	617	5	185	20.1	8.48	46.14	54.73	56.84	75.05	97.48	9.31	14.32	18.24	12.74	32.85	31.55	11.31	43.44	43.29	45.68	32.6	20.2	89.61	61.15	59.66	3	3	5	6	4	2	3	3	3	4	4	2	3	3
FALSE	High	Master Protein	A0A088A7J8	TYR_PHOSPHATASE_2 domain-containing protein OS=Apis mellifera OX=7460 GN=Plip PE=4 SV=1		0	FALSE	7.362	15	2	5	2	192	22.7	8.68		2.61				1.87					0	0	0									1				1					1	1	1
FALSE	High	Master Protein	A0A088AVW5	TYR_PHOSPHATASE_2 domain-containing protein OS=Apis mellifera OX=7460 PE=4 SV=1		0	FALSE	6.01	12	2	7	2	172	19.8	8.31		0							2.02							1.85	2.26	4.55	0			1							1
FALSE	High	Master Protein	A0A087ZQN7	Tyrosine-protein kinase OS=Apis mellifera OX=7460 GN=LOC412588 PE=3 SV=1		0	FALSE	17.453	10	4	22	3	505	57.7	6.43	6.03	4.26	4.97		2.35	4.13	5.95	4.22		4.8	7.57		3.81	6.48	1.98			4.68			2	1	1		1	1	2	1		2	2		1	1
FALSE	High	Master Protein	A0A088AMC1	Tyrosine--tRNA ligase OS=Apis mellifera OX=7460 GN=Aats-tyr PE=3 SV=1		0	FALSE	65.791	38	15	50	15	522	58.7	6	13.82		2.08	2.31		27.13	4.68	4.47	0		16	7.67	1.8	10.92		13.12	2.55	5.4	2.33		6		1	1		8	2	2	3		5	3	1	5
FALSE	High	Master Protein	A0A088A1S9	UAS domain-containing protein OS=Apis mellifera OX=7460 PE=4 SV=1		0	FALSE	15.158	12	3	10	3	409	47.8	6.07	0		4.8			4.46	4.83	4.06		4.78	2.5			0							1		2			1	2	1		1	1			1
FALSE	High	Master Protein	A0A088AVS9	UBA_e1_C domain-containing protein OS=Apis mellifera OX=7460 GN=Uba1 PE=3 SV=1		0	FALSE	196.692	43	32	150	32	1049	117	5.6	28.01	3.05			1.86	84.49	2.67	2.31	1.97		81.24	35.91	5.77	53.62		23.79	40.26	33.62	12.35	5.24	10	1			1	19	2	1	2		18	11	2	14
FALSE	High	Master Protein	A0A088A5Z8	Ubiquitin carboxyl-terminal hydrolase OS=Apis mellifera OX=7460 GN=faf PE=3 SV=1		0	FALSE	8.528	2	3	3	3	2588	294.6	6.14		2.48				2.59											0					1				1
FALSE	High	Master Protein	A0A088A9Q7	Ubiquitin carboxyl-terminal hydrolase OS=Apis mellifera OX=7460 GN=LOC408911 PE=3 SV=1		0	FALSE	6.247	2	1	2	1	1280	147.4	5.31						5.3											4.05									1
FALSE	High	Master Protein	A0A087ZQN5	Ubiquitin carboxyl-terminal hydrolase OS=Apis mellifera OX=7460 GN=LOC411572 PE=3 SV=1		0	FALSE	22.796	13	4	11	4	498	56.4	5.49	2.6				1.78	8.04					9.55			2.49		1.8	3.05				1				1	2					3			1
FALSE	High	Master Protein	A0A088A052	Ubiquitin carboxyl-terminal hydrolase OS=Apis mellifera OX=7460 GN=LOC552324 PE=3 SV=1		0	FALSE	53.61	19	10	28	10	802	91.4	5.67	2.91	3.04				23.51					18.49	3.18		2.71		4.27	4.83			3.57	2	1				7					6	1		1
FALSE	High	Master Protein	A0A088ADV0	Ubiquitin carboxyl-terminal hydrolase OS=Apis mellifera OX=7460 GN=Uch PE=3 SV=1		0	FALSE	38.642	32	5	43	5	234	26.2	5.01	9.94	2.06		0		11.32	2.02	2	0		19.31	12.72	0	12.49		13.41	16.48	6.88	4.56	7.93	2	1		1		3	1	1	2		4	2	1	3
FALSE	High	Master Protein	A0A087ZSM2	Ubiquitin carboxyl-terminal hydrolase OS=Apis mellifera OX=7460 PE=3 SV=1		0	FALSE	10.429	4	2	4	2	884	95.8	8.46	0						2.73					0		0							1						1					1		1
FALSE	High	Master Protein	A0A088ABX5	UBIQUITIN_CONJUGAT_2 domain-containing protein OS=Apis mellifera OX=7460 GN=LOC409225 PE=3 SV=1		0.001	FALSE	5.361	6	1	3	1	181	20.5	8.03	2.28					2.22					2.43										1					1					1
FALSE	High	Master Protein	A0A088A509	UBIQUITIN_CONJUGAT_2 domain-containing protein OS=Apis mellifera OX=7460 GN=LOC409920 PE=4 SV=1		0	FALSE	24.855	51	5	11	5	144	16.3	7.14						3.92			3.74		1.71			1.73		5.98	5.62	3.88	2.64							1			2		1			1
FALSE	High	Master Protein	A0A088A1Z8	UBIQUITIN_CONJUGAT_2 domain-containing protein OS=Apis mellifera OX=7460 GN=LOC413822 PE=3 SV=1		0	FALSE	27.62	35	3	10	3	158	18.2	8.56			2.89			7.97	3.62		0								14.04						1			2	1		1
FALSE	High	Master Protein	A0A088AG51	UBIQUITIN_CONJUGAT_2 domain-containing protein OS=Apis mellifera OX=7460 GN=LOC724793 PE=3 SV=1		0	FALSE	18.251	24	2	11	2	147	16.7	7.3				2.42		9.59			2.21		7.39	4.11		2.3	2.17	2.32								1		2			1		1	1		1
FALSE	High	Master Protein	A0A088A3B1	UBIQUITIN_CONJUGAT_2 domain-containing protein OS=Apis mellifera OX=7460 GN=Ubc13 PE=3 SV=1		0	FALSE	27.34	36	3	27	3	151	17.2	6.01	3.26	2.97				12.98			10.98		11.08	6.75	2.75	3.06		8.13	6.69	8.73	2.95		1	1				2			3		3	2	1	1
FALSE	High	Master Protein	A0A088A4Q8	Ubiquitin-fold modifier 1 OS=Apis mellifera OX=7460 GN=726196 PE=3 SV=1		0.003	FALSE	3.484	17	1	4	1	87	9.4	9.52						2.4			0		0															1			1		1
FALSE	High	Master Protein	A0A088A321	Ubiquitin-like domain-containing protein OS=Apis mellifera OX=7460 GN=e(y)2 PE=4 SV=1		0	FALSE	10.367	36	2	6	2	77	8.7	7.25						7			5.94					2.93			3.2									1			2					1
FALSE	High	Master Protein	A0A088AF98	Ubiquitin-like domain-containing protein OS=Apis mellifera OX=7460 GN=LOC552847 PE=4 SV=1		0	FALSE	7.877	11	3	8	3	240	26.5	6.02							0	0			0	0		2.01													2	1			1	2		2
FALSE	High	Master Protein	A0A088AN20	Ubiquitin-like domain-containing protein OS=Apis mellifera OX=7460 GN=RpL40 PE=4 SV=1		0	FALSE	41.912	41	5	255	1	128	14.7	9.83	45.91	23.87	8.08	7.15	17.69	46.13	18.03	16.52	31.8	15.17	30.14	18	11.4	28.26	12.46	35.03	39.15	11.95	47.84	68.6	4	4	3	2	3	5	2	4	4	4	4	3	4	4
FALSE	High	Master Protein	A0A088AVY1	Ubiquitin-like domain-containing protein OS=Apis mellifera OX=7460 GN=RpS27A PE=4 SV=1		0	FALSE	31.981	34	5	144	1	156	17.9	9.8	15.77	12.52	5.74	2.46	8.41	11.81	6.21	13.73	9.95	7.81	16.26	9.56	9.15	12.89	7.81	8.86	8.98	4.34	47.84	49.32	3	3	2	1	2	5	2	4	3	4	4	3	4	3
FALSE	High	Master Protein	A0A087ZRU4	Ubiquitin-like domain-containing protein OS=Apis mellifera OX=7460 PE=4 SV=1		0	FALSE	54.88	10	7	25	7	1310	144	5.39	7.67	9.38	7.56			15.43	3.59	5.01	2.15		20.82	14.39	5.41			3.23	4.78	7.11			2	2	2			1	1	1	1		3	2	1
FALSE	High	Master Protein	A0A088A3N0	U-box domain-containing protein OS=Apis mellifera OX=7460 PE=4 SV=1		0.003	FALSE	3.487	2	1	1	1	1022	116.6	5.68											0																				1
FALSE	High	Master Protein	A0A088AK76	UBR-type domain-containing protein OS=Apis mellifera OX=7460 GN=LOC412281 PE=4 SV=1		0.001	FALSE	4.989	1	2	2	2	5421	604.7	6.32						2.32					0															1					1
FALSE	High	Master Protein	A0A088ANQ3	UBX domain-containing protein OS=Apis mellifera OX=7460 GN=Gint3 PE=4 SV=1		0	FALSE	15.158	6	2	18	2	441	51	8.06	2.49	2.82	0			2.86	1.83	0			2.45	0	0	0					2.57		1	1	1			1	1	1			1	1	1	1
FALSE	High	Master Protein	A0A087ZN16	UBX domain-containing protein OS=Apis mellifera OX=7460 GN=LOC408433 PE=4 SV=1		0	FALSE	40.671	18	8	26	8	521	58.5	5.52		2.71			2.93	5.5	5.39	3.32	0		12.68	2.77	5.88	6.54	2.86	3.57	7.17	7.06	5.35			1			1	2	2	1	1		4	1	2	2
FALSE	High	Master Protein	A0A088A7I2	UDP-glucuronosyltransferase OS=Apis mellifera OX=7460 GN=LOC409203 PE=3 SV=1		0	FALSE	281.068	59	26	832	26	526	60.2	8.81	186.9	189.75	129.11	107.68	111.21	151.23	166.41	182.17	29.64	114.84	218.73	164.65	147.63	182.06	127.25	135.78	46.39	156.94	27.67	55.29	21	20	16	16	15	18	20	20	10	18	21	20	19	21
FALSE	High	Master Protein	A0A088A7I0	UDP-glucuronosyltransferase OS=Apis mellifera OX=7460 GN=LOC727593 PE=3 SV=1		0	FALSE	68.338	29	10	90	10	523	59.7	7.99	19	33.69	0		2.51	22.68	33.87	23.94		11.85	27.43	33.12	15.87	20.94	4.89		11.43	6.26	6.8	3.76	3	5	1		1	4	5	3		2	5	6	3	3
FALSE	High	Master Protein	A0A087ZMR4	Uncharacterized protein OS=Apis mellifera OX=7460 PE=4 SV=1		0	FALSE	1845.45	60	268	2825	268	5378	623.1	5.92	507.73	382.72	302.65	171.58	258.78	573.72	555.8	522.5	176.97	535.65	506.13	350.58	494.98	477.43	342.74	355.03	469.47	363.12	377.82	173.89	115	98	92	69	86	134	138	132	78	139	121	98	134	121
FALSE	High	Master Protein	A0A087ZMR5	Uncharacterized protein OS=Apis mellifera OX=7460 PE=4 SV=1	PREDICTED: Apis mellifera nesprin-1 (LOC551356), transcript variant X1, mRNA	0	FALSE	709.098	64	98	953	98	2024	231.7	5.15	194.96	163.7	57.03	11.8	46.07	241.37	248.13	143.72	67.2	194.93	213.96	141.91	181.17	159.28	92.11	116.88	226.85	139.57	83.73	27.53	36	37	17	11	19	54	48	38	32	48	47	32	45	40
FALSE	High	Master Protein	A0A087ZMR6	Uncharacterized protein OS=Apis mellifera OX=7460 PE=4 SV=1	PREDICTED: Apis mellifera nesprin-1 (LOC551356), transcript variant X1, mRNA	0	FALSE	32.16	6	5	6	5	1442	165	7.03							3.67									2.68	2.85	3.46									1
FALSE	High	Master Protein	A0A087ZMS7	Uncharacterized protein OS=Apis mellifera OX=7460 GN=Rab39 PE=4 SV=1		0	FALSE	19.615	26	4	32	3	218	24.7	6.3	2.46	2.65	2.75	2.76	4.38	2.39	8.58	6	4.85	7.38	8.87	4.58	2.8	8				2.75	5.96	8.56	1	1	1	1	1	1	3	2	1	1	2	1	1	1
FALSE	High	Master Protein	A0A087ZMW3	Uncharacterized protein OS=Apis mellifera OX=7460 PE=4 SV=1	PREDICTED: Apis mellifera heterogeneous nuclear ribonucleoprotein 27C (LOC409961), transcript variant X3, mRNA	0	FALSE	29.467	16	5	21	5	437	46.2	7.02	3.53					12.19	2.9		1.68	2.6	10.81			3.21		0	0	0	0	0	1					4	2		1	1	4			2
FALSE	High	Master Protein	A0A087ZMY1	Uncharacterized protein OS=Apis mellifera OX=7460 GN=LOC726040 PE=4 SV=1	PREDICTED: Apis mellifera 4-coumarate--CoA ligase 1 (LOC726040), transcript variant X1, mRNA	0	FALSE	99.438	46	17	68	17	586	65.6	8.47	15.74	8.76	14.92	0		5.77	17.85	5.58			22.1	18.55	6.06	18.14	3.87	7.79	19.9	8.91	10.59	5.53	3	2	3	2		1	4	1			5	6	1	4
FALSE	High	Master Protein	A0A087ZN03	Uncharacterized protein OS=Apis mellifera OX=7460 GN=LOC726759 PE=4 SV=1		0.001	FALSE	4.691	2	2	2	2	1185	132.5	8.79						1.77													0							1
FALSE	High	Master Protein	A0A087ZN37	Uncharacterized protein OS=Apis mellifera OX=7460 GN=408429 PE=4 SV=1	PREDICTED: Apis mellifera tensin-1 (LOC408429), transcript variant X16, mRNA	0	FALSE	249.206	36	39	207	39	1617	177.7	8.16	58.52	11.42	0	18.55	23.71	63.69	39.17	22.8	42.9	16.12	57.88	23.56	41.19	30.69	5.97	40.06	41.19	39.1	11.11	0	15	5	1	7	8	19	12	7	13	6	17	7	14	11
FALSE	High	Master Protein	A0A087ZND8	Uncharacterized protein OS=Apis mellifera OX=7460 GN=Mlc2 PE=4 SV=1	PREDICTED: Apis mellifera myosin regulatory light chain 2 (LOC409881), mRNA	0	FALSE	334.759	79	16	1190	16	213	23.5	4.89	207.29	237.21	284.49	57.55	79.12	226.9	268.43	326.06	234.57	196.99	213.27	198.07	224.8	196.47	170.15	276.02	283.19	372.02	21.66	292.24	14	15	15	7	11	15	15	16	13	14	15	14	15	15
FALSE	High	Master Protein	A0A087ZNE1	Uncharacterized protein OS=Apis mellifera OX=7460 PE=4 SV=1		0.003	FALSE	3.422	4	1	2	1	264	29.3	5.19									1.86										2.13										1
FALSE	High	Master Protein	A0A087ZNG2	Uncharacterized protein OS=Apis mellifera OX=7460 PE=4 SV=1	PREDICTED: Apis mellifera transcriptional activator protein Pur-beta (LOC726399), transcript variant X1, mRNA	0	FALSE	53.05	40	8	47	8	295	33.2	9.29	20.63	12.73	6.06	6.07	6.85	21.15	3.43	3.31	13.01	4.97	2.9		5.74	7.77	8.91	2	17.01		2.76	6.59	3	3	2	2	2	5	1	1	4	2	1		2	2
FALSE	High	Master Protein	A0A087ZNH9	Uncharacterized protein OS=Apis mellifera OX=7460 GN=LOC409715 PE=4 SV=1		0.002	FALSE	4.482	1	1	1	1	997	110.6	8.62			2.45																				1
FALSE	High	Master Protein	A0A087ZNI0	Uncharacterized protein OS=Apis mellifera OX=7460 GN=CYP6AS10 PE=3 SV=1		0	FALSE	16.299	8	3	29	1	499	58.3	8.46	2.83		3.03			6.4	4.65	9.22	2.55	3.15	8.7	6.11	8.41	8.22	5.6	6.52		0	1.87		1		1			1	1	2	1	1	2	1	2	2
FALSE	High	Master Protein	A0A087ZNL6	Uncharacterized protein OS=Apis mellifera OX=7460 PE=3 SV=1		0	FALSE	14.773	11	4	14	4	541	60.4	9.17			0			3.06	2.94	0				0	3.01	0		2.54		3.08	2.82	2.13			1			1	2	1				1	2	1
FALSE	High	Master Protein	A0A087ZNP5	Uncharacterized protein OS=Apis mellifera OX=7460 PE=4 SV=1		0	FALSE	14.495	22	4	13	4	326	39.2	5.6	0		0			4.45	2.3	0			7.03	0	5.22		0						1		1			2	1	1			3	1	2
FALSE	High	Master Protein	A0A087ZNQ7	Uncharacterized protein OS=Apis mellifera OX=7460 GN=LOC551462 PE=4 SV=1	PREDICTED: Apis mellifera sister chromatid cohesion protein PDS5 homolog B (LOC551462), transcript variant X2, mRNA	0	FALSE	15.123	4	4	17	4	1210	138.6	7.3	2.38	0				4.82	2.42	0		0							0	1.65			2	1				2	2	1		1
FALSE	High	Master Protein	A0A087ZNX0	Uncharacterized protein OS=Apis mellifera OX=7460 GN=Rab11 PE=4 SV=1	PREDICTED: Apis mellifera ras-related protein Rab-11A (LOC551603), transcript variant X1, mRNA	0	FALSE	77.083	69	11	136	11	215	24.4	6.01	22.31	20.72	20.49	9.44	10.68	27.39	17.08	30.63	6.16	15.73	25.37	10.5	29.43	21.54	20.44	29.17	5.02	31.25	12.88	16.95	7	5	8	4	4	5	5	7	4	5	6	2	7	7
FALSE	High	Master Protein	A0A087ZNY7	Uncharacterized protein OS=Apis mellifera OX=7460 PE=4 SV=1		0	FALSE	13.889	7	4	92	3	569	65.5	5.24	9.79	6.22	14.41	11.91	13.62	5.36	7.5	8.42	7.21	10.84	9.85	2.09	9.99	8.82	9.48	4.2	6.25	8.81	4.11	3.98	2	1	3	3	3	1	1	2	2	2	2	1	2	2
FALSE	High	Master Protein	A0A087ZNY8	Uncharacterized protein OS=Apis mellifera OX=7460 GN=102654371 PE=4 SV=1	PREDICTED: Apis mellifera pro-resilin-like (LOC102654371), mRNA	0	FALSE	60.088	19	5	1654	5	299	31	8.13	216.93	178.42	461.35	260.25	279.88	70.89	94.25	140.92	82.65	154.12	140.27	114.91	279.86	172.39	201.19	146.51	54.46	290.27	561.61	179.34	4	4	4	4	4	4	4	4	5	4	4	4	4	4
FALSE	High	Master Protein	A0A087ZNY9	Uncharacterized protein OS=Apis mellifera OX=7460 GN=RpL35 PE=3 SV=1		0	FALSE	27.262	33	6	58	5	123	14.4	10.9	7.32	5.61	3.83	2.89	4.72	13.88	7.32	10.4	2.93	3.95	9.9	3.79	3.74	4.03	5.47	2.04	11.84	8.74	8.01	3.01	5	2	3	1	3	4	4	4	1	2	3	2	3	2
FALSE	High	Master Protein	A0A087ZNZ9	Uncharacterized protein OS=Apis mellifera OX=7460 GN=Echs1 PE=3 SV=1		0	FALSE	119.065	48	14	276	14	295	32.5	9.06	43.77	16.09	22.56	2.17	0	69.59	16.59	36.04	9.92	5.68	64.56	46.95	45.69	50	35.47	80.62	12.55	65.65	41.42	21.86	10	6	8	2	1	11	6	9	5	2	13	10	10	11
FALSE	High	Master Protein	A0A087ZP01	Uncharacterized protein OS=Apis mellifera OX=7460 PE=4 SV=1	PREDICTED: Apis mellifera cytochrome c oxidase subunit 7C, mitochondrial (LOC726297), mRNA	0	FALSE	10.582	26	1	14	1	81	9.3	10.43		4.18	9.07	11.76	8.59								5.07		8.02	2.82		5.16	4.08			1	1	1	1								1
FALSE	High	Master Protein	A0A087ZP04	Uncharacterized protein OS=Apis mellifera OX=7460 GN=LOC413252 PE=4 SV=1	PREDICTED: Apis mellifera ATP-binding cassette sub-family F member 2 (LOC413252), transcript variant X2, mRNA	0	FALSE	9.273	4	2	3	2	632	71.7	7.28	2.15			2	0																1			1	1
FALSE	High	Master Protein	A0A087ZP31	Uncharacterized protein OS=Apis mellifera OX=7460 PE=4 SV=1		0	FALSE	479.189	26	80	471	80	4464	499.5	5.27	22.5	64.54	17.7	2.61	23.07	50.13	160.8	76.61		45	119.12	35.22	54.8	37.41	56.92	15.82	53.46	81.95	30.8	63.66	10	21	10	2	11	19	50	27		18	41	15	19	17
FALSE	High	Master Protein	A0A087ZP36	Uncharacterized protein OS=Apis mellifera OX=7460 GN=LOC725967 PE=4 SV=1	PREDICTED: Apis mellifera D-3-phosphoglycerate dehydrogenase (LOC725967), transcript variant X2, mRNA	0	FALSE	29.298	19	6	18	6	513	55.9	6.98	0					4.69	0	0			7.94	0		0				2.56	6.81	1.83	1					1	1	1			2	1		1
FALSE	High	Master Protein	A0A087ZP46	Uncharacterized protein OS=Apis mellifera OX=7460 PE=4 SV=1	PREDICTED: Apis mellifera GPI transamidase component PIG-S (LOC413664), transcript variant X2, mRNA	0.001	FALSE	5.509	3	1	3	1	540	60.8	6.57								2.62			3.46	3.54																1			1	1
FALSE	High	Master Protein	A0A087ZPA6	Uncharacterized protein OS=Apis mellifera OX=7460 PE=4 SV=1		0	FALSE	9.196	5	2	2	2	856	97.6	7.72						5.14																				2
FALSE	High	Master Protein	A0A087ZPB7	Uncharacterized protein OS=Apis mellifera OX=7460 GN=LOC412864 PE=4 SV=1	PREDICTED: Apis mellifera FUN14 domain-containing protein 1 (LOC412864), transcript variant X3, mRNA	0	FALSE	43.285	22	5	78	5	200	22.5	9.85	19.43	18.19	7.05	6.51	8.92	11.5	15.93	14.68	9.52	6.92	12.27	9.57	11.51	10.69	7.27	9.58	10.2	18.23	9.76	8.99	2	2	2	2	2	2	2	2	2	2	2	2	2	2
FALSE	High	Master Protein	A0A087ZPH4	Uncharacterized protein OS=Apis mellifera OX=7460 PE=4 SV=1		0	FALSE	68.261	50	8	56	8	287	30.5	6.9	26.3	9.56	2	5.77	5.64	37.47	15.27	11.35	3.11	8.44	21.38		8.67	5.67		12.75		6.49	2.28	2.29	5	2	1	2	2	7	3	3	2	3	4		3	2
FALSE	High	Master Protein	A0A087ZPH5	Uncharacterized protein OS=Apis mellifera OX=7460 PE=3 SV=1		0	FALSE	69.154	25	10	59	10	542	61.9	5.31	15.28	16.76	3.14	2.66	2.76	18.09	12.05	11.69	2.27	14.09	16.62	5.73	13.4	0	0	9.13		2.6	2.77	1.9	4	4	1	1	1	3	3	3	1	4	4	2	3	1
FALSE	High	Master Protein	A0A087ZPK0	Uncharacterized protein OS=Apis mellifera OX=7460 GN=Cryl1 PE=4 SV=1	Apis mellifera lambda crystallin-like protein (Cryl1), mRNA	0	FALSE	65.449	51	13	44	13	317	35.8	7.03	6.08					22.72					18.27	5.07		11.21	15.06			9.93	3.1	9.8	3					9					7	2		4
FALSE	High	Master Protein	A0A087ZPR6	Uncharacterized protein OS=Apis mellifera OX=7460 GN=Rnp4F PE=4 SV=1		0.002	FALSE	3.953	1	1	3	1	910	105	5.36						2.26					2.67															1					1
FALSE	High	Master Protein	A0A087ZPS2	Uncharacterized protein OS=Apis mellifera OX=7460 GN=LOC552206 PE=3 SV=1	PREDICTED: Apis mellifera putative ATP-dependent RNA helicase me31b (LOC552206), transcript variant X1, mRNA	0	FALSE	51.679	30	10	50	10	444	50.6	7.74	20.87	9.45	4.02	2.4	1.67	15.07	10.97	5.86	0	3.45	5.43	7.9	5.67	7.29	2.84	0	8.86	3.88	2.29	3.33	6	2	2	1	1	3	3	2	2	1	3	3	2	3
FALSE	High	Master Protein	A0A087ZPT8	Uncharacterized protein OS=Apis mellifera OX=7460 GN=LOC410071 PE=3 SV=1	PREDICTED: Apis mellifera glycerol-3-phosphate phosphatase (LOC410071), mRNA	0	FALSE	23.082	23	4	7	4	307	34.1	5.27						6.24					2.61						9.59			2.66						2					1
FALSE	High	Master Protein	A0A087ZPU0	Uncharacterized protein OS=Apis mellifera OX=7460 PE=3 SV=1	PREDICTED: Apis mellifera farnesol dehydrogenase (LOC412458), mRNA	0	FALSE	125.519	70	13	228	13	262	28.7	7.49	29.27	14.71	65.31	29.58	3.05	46.44	32.8	47.81	18.41	2.89	86.98	43.05	30.39	46.2	27.32	34.49	17.22	18.71	11.63	7.55	6	4	9	6	1	8	6	8	7	4	9	6	6	7
FALSE	High	Master Protein	A0A087ZPU1	Uncharacterized protein OS=Apis mellifera OX=7460 GN=LOC724721 PE=3 SV=1	PREDICTED: Apis mellifera farnesol dehydrogenase (LOC724721), mRNA	0	FALSE	226.946	88	22	732	22	252	28.1	8.37	38.96	14.11	31.21	62.85	56.79	71.17	100.57	65.47	65.4	19.13	154.63	105.14	35.62	124.5	111.67	282.56	88.82	396.03	141.64	33.96	8	2	9	12	12	11	12	11	13	6	13	12	6	13
FALSE	High	Master Protein	A0A087ZPU6	Uncharacterized protein OS=Apis mellifera OX=7460 GN=AIF PE=4 SV=1	PREDICTED: Apis mellifera apoptosis-inducing factor 1, mitochondrial (LOC412212), mRNA	0	FALSE	81.676	31	14	144	14	661	74.3	8.51	22.14	23.75	16.22	2.6	2.71	23.54	26.92	40.73	0	24.29	20.08	14.46	20.42	9.91	12.19	3.92	4	10.27		11.2	6	6	6	2	1	10	7	11	1	7	5	5	7	6
FALSE	High	Master Protein	A0A087ZPU7	Uncharacterized protein OS=Apis mellifera OX=7460 PE=4 SV=1		0	FALSE	24.022	48	3	32	3	62	7.2	8.72	6.48	10	3.23	2.95	6	12.66	13.31	11.39	3.51	6.7	8.04	3.51	3.78	10.46	3.02		5.92				2	2	1	1	2	2	2	2	1	2	2	1	1	2
FALSE	High	Master Protein	A0A087ZPU8	Uncharacterized protein OS=Apis mellifera OX=7460 PE=4 SV=1		0	FALSE	57.187	42	6	124	6	155	17.4	9.63	20.03	21.15	13.96	11.62	19.56	27.22	24.23	24.2	6.13	18.04	21.13	20.45	18.96	21.93	13.57	19.15	5.47	14.15	13.13	1.89	4	4	4	4	4	4	4	4	2	5	3	4	3	4
FALSE	High	Master Protein	A0A087ZPV6	Uncharacterized protein OS=Apis mellifera OX=7460 GN=ArrL3 PE=4 SV=1	PREDICTED: Apis mellifera arrestin domain-containing protein 17 (LOC724328), mRNA	0	FALSE	88.972	37	12	98	12	393	43.8	5.27	18.95	11.29	13.85	5.59	4.75	12.65	7.05	21.57	4.11	7.93	15.05	13.76	17.98	20.19	11.17	13.06	11.36	24.22	12.17	33.18	5	4	5	2	2	5	2	5	2	3	4	4	5	6
FALSE	High	Master Protein	A0A087ZPX3	Uncharacterized protein OS=Apis mellifera OX=7460 PE=4 SV=1		0	FALSE	20.193	10	5	16	5	558	63.4	5.88	2.1					0	0				2.39			2.27		2.61	2.16	4.96	2.1	3.92	2					1	1				2			1
FALSE	High	Master Protein	A0A087ZQ23	Uncharacterized protein OS=Apis mellifera OX=7460 GN=LOC724280 PE=4 SV=1		0.001	FALSE	4.594	7	1	3	1	149	18.2	7.17											0		2.11							2.61											1		1
FALSE	High	Master Protein	A0A087ZQ26	Uncharacterized protein OS=Apis mellifera OX=7460 PE=4 SV=1		0	FALSE	14.703	1	1	8	1	1657	183.9	4.48	5.41					6.12	6.24	0										3.59			1					1	1	1
FALSE	High	Master Protein	A0A087ZQ27	Uncharacterized protein OS=Apis mellifera OX=7460 PE=3 SV=1		0	FALSE	396.399	60	37	1052	17	658	71.7	5.58	217.37	144.86	61.81	89.93	56.08	266.95	107.73	100.72	121.1	34.45	238.13	159.81	110.81	206.88	64.23	334.78	169.25	349.02	181.64	85.85	24	21	18	19	15	28	24	20	20	10	25	24	23	25
FALSE	High	Master Protein	A0A087ZQ48	Uncharacterized protein OS=Apis mellifera OX=7460 GN=Vha26 PE=3 SV=1	PREDICTED: Apis mellifera V-type proton ATPase subunit E (LOC552720), mRNA	0	FALSE	104.198	62	13	198	13	226	26.1	7.85	28.53	40.39	22.17	15.02	9.5	50.33	60.9	34.21	15.33	23.91	56.97	10.26	39.24	28.7	9.6	8.38	45.17	21.01	5.08	0	7	9	5	3	5	8	9	5	7	5	9	7	7	7
FALSE	High	Master Protein	A0A087ZQ67	Uncharacterized protein OS=Apis mellifera OX=7460 GN=LOC413128 PE=4 SV=1	PREDICTED: Apis mellifera putative ferric-chelate reductase 1 homolog (LOC413128), transcript variant X1, mRNA	0	FALSE	52.74	18	8	44	8	623	69.2	7.01	9.37	3.39			4.05	3.5	2.22	7.17			13.85	8.23	2.19	6.34	7.84	5.58		14.99	4.25	10.35	4	2			2	2	1	2			5	4	1	4
FALSE	High	Master Protein	A0A087ZQ97	Uncharacterized protein OS=Apis mellifera OX=7460 GN=LOC726221 PE=4 SV=1		0	FALSE	10.372	11	1	18	1	113	11.6	8.69		8.73	2.22				3.01	3.07		2.01	3.25	2.87	1.69	1.7		2.11		5.49	0			1	1				1	1		1	1	1	1	1
FALSE	High	Master Protein	A0A087ZQA3	Uncharacterized protein OS=Apis mellifera OX=7460 GN=LOC726088 PE=4 SV=1	PREDICTED: Apis mellifera serine/threonine-protein phosphatase 2A 65 kDa regulatory subunit A alpha isoform (LOC726088), transcript variant X2, mRNA	0	FALSE	121.51	35	17	115	17	590	65.7	5.06	15.51	15.5		1.7	7.18	59.9	23.21	5.62	2.25	2.35	49.62	20.01	14.67	35.88	7	15.53	19.82	2.96	6.32	7.81	4	4		2	2	12	5	2	1	1	8	3	4	6
FALSE	High	Master Protein	A0A087ZQB2	Uncharacterized protein OS=Apis mellifera OX=7460 GN=Gclm PE=4 SV=1		0.003	FALSE	3.517	5	1	3	1	243	27.1	5.08						2.56					1.76					2.25										1					1
FALSE	High	Master Protein	A0A087ZQE3	Uncharacterized protein OS=Apis mellifera OX=7460 GN=LOC727126 PE=4 SV=1		0	FALSE	21.223	27	3	50	3	153	17.2	5.48	6.18	2.55	0		0	9.09	10.64	10.82		2.74	11.09	2.62	5.27	5.11	0	0	10.07	0		5.56	2	1	1		1	2	3	2		2	3	2	2	2
FALSE	High	Master Protein	A0A087ZQI2	Uncharacterized protein OS=Apis mellifera OX=7460 GN=727263 PE=4 SV=1	PREDICTED: Apis mellifera chromobox protein homolog 5 (LOC727263), mRNA	0	FALSE	46.944	27	7	60	7	333	39	9.07	13.8	7.78	2.43	2.7	2.85	17.85	13.53	5.65	4.9	7.34	10.83	3.46		7.09		5.12	10.55	13.39	0		4	3	1	1	1	4	3	1	1	2	4	1		2
FALSE	High	Master Protein	A0A087ZQI4	Uncharacterized protein OS=Apis mellifera OX=7460 GN=LOC551546 PE=4 SV=1	PREDICTED: Apis mellifera BAG family molecular chaperone regulator 2 (LOC551546), mRNA	0	FALSE	50.938	59	7	35	7	185	21.2	5.14	13.16					19.54					20.26	10.86		16.75		0	18.96	5.81	9.42	5.83	2					6					4	3		5
FALSE	High	Master Protein	A0A087ZQI7	Uncharacterized protein OS=Apis mellifera OX=7460 GN=LOC409340 PE=4 SV=1	PREDICTED: Apis mellifera UV excision repair protein RAD23 homolog B (LOC409340), transcript variant X2, mRNA	0	FALSE	8.135	11	3	3	3	364	39.6	4.68		0							0											2.59		1							1
FALSE	High	Master Protein	A0A087ZQJ6	Uncharacterized protein OS=Apis mellifera OX=7460 GN=RpL17 PE=3 SV=1		0	FALSE	40.103	35	5	129	5	185	21.4	10.1	22.44	27.54	19.62	21.44	19.15	25.97	26.25	31.8	4.72	25.05	29.97	31.8	29.76	19.23	19.5	6.5		10.32	7.16	8.29	4	4	4	4	4	4	4	4	2	4	4	4	4	4
FALSE	High	Master Protein	A0A087ZQM3	Uncharacterized protein OS=Apis mellifera OX=7460 PE=4 SV=1	PREDICTED: Apis mellifera 39S ribosomal protein L12, mitochondrial (LOC409926), mRNA	0	FALSE	34.615	36	6	27	6	179	19.8	6.54			2.74			12.52	5.4	7.57	0	0	6.03	0		0		10.88	8.7	4.09	3.5				1			4	2	2	1	2	3	1		1
FALSE	High	Master Protein	A0A087ZQN9	Uncharacterized protein OS=Apis mellifera OX=7460 GN=RpL38 PE=3 SV=1		0	FALSE	12.251	29	3	37	3	75	8.9	10.26	5.24		7.22	5.21	5.09	3.2	2.77	7.84	2.24	3.05	4.89	4.91	5.58	2.83	2.84	4.35	2.18	6.53	6.98		1		2	1	2	2	1	2	1	1	2	2	1	1
FALSE	High	Master Protein	A0A087ZQS4	Uncharacterized protein OS=Apis mellifera OX=7460 PE=4 SV=1		0.002	FALSE	4.397	1	2	2	2	3276	374.6	6.74		3.48																		0		1
FALSE	High	Master Protein	A0A087ZQU9	Uncharacterized protein OS=Apis mellifera OX=7460 GN=LOC552528 PE=3 SV=1	PREDICTED: Apis mellifera calnexin (LOC552528), transcript variant X1, mRNA	0	FALSE	25.011	17	5	29	5	602	70.2	4.91	0	0	0		0	1.75	0	2.04		0	4.42	0		0		0	0	0	0		1	1	1		1	1	2	2		1	4	1		2
FALSE	High	Master Protein	A0A087ZQV3	Uncharacterized protein OS=Apis mellifera OX=7460 GN=LOC725669 PE=4 SV=1		0	FALSE	5.935	9	1	3	1	265	31.3	9.55						2.51					0							2.41								1					1
FALSE	High	Master Protein	A0A087ZR01	Uncharacterized protein OS=Apis mellifera OX=7460 GN=Cpap3-c PE=4 SV=1	Apis mellifera cuticular protein analogous to peritrophins 3-C (Cpap3-c), mRNA	0	FALSE	48.973	66	12	45	12	269	29.5	5.01	2.4	3.12	11.78	6.86	4.4	0	4.28	5.15	10.89	2.36	2.49			3.54	2.41	8.65		12.74	6.47		1	1	6	4	3	1	1	3	7	3	1			2
FALSE	High	Master Protein	A0A087ZR09	Uncharacterized protein OS=Apis mellifera OX=7460 GN=pix PE=4 SV=1	PREDICTED: Apis mellifera ATP-binding cassette sub-family E member 1 (LOC551235), mRNA	0	FALSE	20.254	7	3	10	3	608	68.4	7.94						6.9	3.2				8.11		3.61	6.4			3.04	2.89								2	1				2		1	2
FALSE	High	Master Protein	A0A087ZR22	Uncharacterized protein OS=Apis mellifera OX=7460 GN=LOC410915 PE=3 SV=1	PREDICTED: Apis mellifera aquaporin AQPAn.G (LOC410915), transcript variant X2, mRNA	0	FALSE	16.894	13	2	22	2	264	27	8.18		3.06			7.57	5.74	3.03	9.55		3.11	2.83	9.69	7.58		0	3.43		3.15				1			1	1	1	1		1	1	2	2
FALSE	High	Master Protein	A0A087ZR24	Uncharacterized protein OS=Apis mellifera OX=7460 PE=4 SV=1		0	FALSE	8.169	8	2	3	2	290	33.2	6.32											0	0																			2	1
FALSE	High	Master Protein	A0A087ZR35	Uncharacterized protein OS=Apis mellifera OX=7460 GN=pita PE=4 SV=1		0	FALSE	35.033	10	7	21	7	1217	140.1	5.95	6.43	6.34	0			15.84	7.8				9.87	4.28		3.81		3.48		9.43			2	2	1			4	3				3	1		1
FALSE	High	Master Protein	A0A087ZR63	Uncharacterized protein OS=Apis mellifera OX=7460 GN=100577576 PE=4 SV=1		0.001	FALSE	4.679	11	2	3	2	257	28.8	5.35				0	0											2.09								1	1
FALSE	High	Master Protein	A0A087ZR76	Uncharacterized protein OS=Apis mellifera OX=7460 GN=LOC408864 PE=4 SV=1		0.001	FALSE	4.918	8	1	5	1	168	19	8.06		2.05					2.57	2.77				0	2.06									1					1	1				1	1
FALSE	High	Master Protein	A0A087ZR95	Uncharacterized protein OS=Apis mellifera OX=7460 GN=Aats-gln PE=3 SV=1	PREDICTED: Apis mellifera probable glutamine--tRNA ligase (LOC413718), transcript variant X1, mRNA	0.002	FALSE	4.475	4	2	3	2	776	89.1	7.02													3.04	3.36			0																1	1
FALSE	High	Master Protein	A0A087ZRA1	Uncharacterized protein OS=Apis mellifera OX=7460 PE=3 SV=1		0	FALSE	745.386	94	40	10971	1	388	43	5.49	1877.23	1670.95	1596.21	651.69	695.68	2176.8	1590.94	1834.37	821.22	1389.26	1805.16	1476.66	1826.37	1676.19	1172.11	3070.3	1114.37	3150.78	1793.05	2474.59	23	20	25	21	23	25	24	24	24	23	21	20	21	24
FALSE	High	Master Protein	A0A087ZRG0	Uncharacterized protein OS=Apis mellifera OX=7460 GN=100576404 PE=4 SV=1		0.001	FALSE	4.684	1	1	6	1	909	104.3	7.68	2.09	2.15			0		2.31	1.95						2.12							1	1			1		1	1						1
FALSE	High	Master Protein	A0A087ZRH4	Uncharacterized protein OS=Apis mellifera OX=7460 GN=LOC552027 PE=4 SV=1		0	FALSE	48.857	23	7	98	7	378	39.1	9.39	21.53	25.47	1.94	0	1.84	38.46	34.46	23.83	3.54	11.46	16.86	5.07	4.75	11.66	1.93	7.26	11.92	9.97		2.47	5	4	1	1	2	6	5	5	3	3	5	2	2	4
FALSE	High	Master Protein	A0A087ZRN3	Uncharacterized protein OS=Apis mellifera OX=7460 GN=LOC412666 PE=4 SV=1		0.002	FALSE	4.422	4	1	2	1	275	31.7	9.36				0													2.27							1
FALSE	High	Master Protein	A0A087ZRN4	Uncharacterized protein OS=Apis mellifera OX=7460 GN=LOC551178 PE=4 SV=1		0.001	FALSE	5.317	6	1	3	1	278	31.9	9.36		2.37					2.73				2.04											1					1				1
FALSE	High	Master Protein	A0A087ZRN5	Uncharacterized protein OS=Apis mellifera OX=7460 PE=4 SV=1	PREDICTED: Apis mellifera carboxypeptidase D (LOC724816), transcript variant X1, mRNA	0	FALSE	9.291	2	2	2	2	1453	165	6.32														2.73					2															1
FALSE	High	Master Protein	A0A087ZRP6	Uncharacterized protein OS=Apis mellifera OX=7460 PE=4 SV=1		0	FALSE	7.268	7	3	10	3	594	69.7	7.53	0	0				2.41	2.02	1.83			2.3		2.33	2.09							1	1				1	2	1			2		1	1
FALSE	High	Master Protein	A0A087ZRP7	Uncharacterized protein OS=Apis mellifera OX=7460 PE=4 SV=1		0.002	FALSE	3.579	8	1	1	1	280	32	8.95																			2.32
FALSE	High	Master Protein	A0A087ZRX1	Uncharacterized protein OS=Apis mellifera OX=7460 GN=410078 PE=4 SV=1	PREDICTED: Apis mellifera echinoderm microtubule-associated protein-like 2 (LOC410078), transcript variant X9, mRNA	0	FALSE	49.233	15	10	21	10	904	100.1	7.28			2.33			9.66				0	7.15	3.58				5.81		5.41		14.2			1			4				1	3	2
FALSE	High	Master Protein	A0A087ZRX6	Uncharacterized protein OS=Apis mellifera OX=7460 PE=4 SV=1		0.001	FALSE	4.915	4	1	2	1	304	34.1	6.3											2.19			1.84																	1			1
FALSE	High	Master Protein	A0A087ZS24	Uncharacterized protein OS=Apis mellifera OX=7460 GN=Clic PE=4 SV=1	PREDICTED: Apis mellifera chloride intracellular channel exc-4 (LOC408481), mRNA	0	FALSE	70.23	60	10	92	10	260	29.9	6.19	15.42	3.33	9.08	5.27	7.31	57.71	3.3	6.18	10.4	2.51	40.22	21.15	5.41	28.11	11.17	10.62	17.8	6.5	6.39		3	2	4	2	3	9	1	1	4	1	5	4	1	4
FALSE	High	Master Protein	A0A087ZS49	Uncharacterized protein OS=Apis mellifera OX=7460 GN=RpL34 PE=3 SV=1		0	FALSE	12.484	29	4	92	4	118	14.1	11.21	3.98	5.88	5.34	2.2	3.43	3.67	0	5.61	0	0	5.99	3.72	5.52	3.76	2.13	3.94		1.62	4.42	4.06	4	3	3	4	4	3	3	3	1	3	4	3	4	2
FALSE	High	Master Protein	A0A087ZS76	Uncharacterized protein OS=Apis mellifera OX=7460 GN=Nep3 PE=4 SV=1		0	FALSE	7.954	4	2	5	2	779	89.1	6.92	2.69					0	0			0							1.78				1					1	1			1
FALSE	High	Master Protein	A0A087ZS91	Uncharacterized protein OS=Apis mellifera OX=7460 PE=4 SV=1		0	FALSE	89.607	52	14	155	14	297	33.1	8.9	30.35	4.51	9.18	2.05	2.45	46.77	8.94	13.97	10.78	9.73	48.04	14.28	11.93	31.63	5.07	40.86	7.48	32.36	21.22	5.23	8	3	3	1	2	12	6	4	4	4	11	4	7	8
FALSE	High	Master Protein	A0A087ZSA0	Uncharacterized protein OS=Apis mellifera OX=7460 GN=Tom7 PE=4 SV=1	Apis mellifera translocase of outer membrane 7 (Tom7), mRNA	0	FALSE	9.576	81	3	26	3	54	6.1	10.01	4.57	4.72	4.03	0		4	4.69	3.67		4.18	2.19	2.15	4.24	3.55	2.59			1.95			2	2	3	1		2	2	2		2	1	1	2	2
FALSE	High	Master Protein	A0A087ZSA8	Uncharacterized protein OS=Apis mellifera OX=7460 GN=LOC410570 PE=4 SV=1		0.006	FALSE	3.017	3	1	1	1	798	88.1	6.11											2.52																				1
FALSE	High	Master Protein	A0A087ZSB5	Uncharacterized protein OS=Apis mellifera OX=7460 GN=LOC408497 PE=4 SV=1		0	FALSE	48.525	11	9	26	9	1088	125	5.12	2.1	0				5.93	8.08	11.13			2.79	5.67	0	0		0	2.72	5.69			2	1				2	3	4			2	1	1	1
FALSE	High	Master Protein	A0A087ZSB8	Uncharacterized protein OS=Apis mellifera OX=7460 GN=LOC727232 PE=4 SV=1		0	FALSE	65.319	17	10	64	10	904	98.4	8.37	20.37	14.87	5.38	4.86	6.18	17.52	17.47	8.17	0	20	13.05	3.37	10.95	16.98	1.87	2.79	15.43		3.61		3	3	1	2	1	3	4	1	2	3	3	1	2	2
FALSE	High	Master Protein	A0A087ZSC2	Uncharacterized protein OS=Apis mellifera OX=7460 PE=4 SV=1		0	FALSE	11.594	42	2	23	2	108	10.6	9.16		3.23	9.88	7.04	7.62	3.31			5.17	2.89	5		9.57	6.13	2.24							1	2	1	1	1			2	1	2		2	2
FALSE	High	Master Protein	A0A087ZSC9	Uncharacterized protein OS=Apis mellifera OX=7460 GN=LOC552671 PE=4 SV=1	PREDICTED: Apis mellifera cytochrome b-c1 complex subunit 2, mitochondrial (LOC552671), mRNA	0	FALSE	265.144	72	27	637	27	442	47.6	7.81	136.54	116.89	107.76	60.29	91.44	113.17	133.84	125.45	76.04	93.87	113.59	74.22	116.36	111.44	132.77	56.43	49.46	58.79	36.51	109.31	18	17	17	14	15	16	18	17	13	15	15	13	13	16
FALSE	High	Master Protein	A0A087ZSD6	Uncharacterized protein OS=Apis mellifera OX=7460 PE=4 SV=1		0.003	FALSE	3.524	0	1	1	1	1899	210.9	5.44												3.19																				1
FALSE	High	Master Protein	A0A087ZSD9	Uncharacterized protein OS=Apis mellifera OX=7460 PE=4 SV=1		0.001	FALSE	4.571	12	1	3	1	154	17.4	6.35						3.39	3.42				3.53															1	1				1
FALSE	High	Master Protein	A0A087ZSE7	Uncharacterized protein OS=Apis mellifera OX=7460 GN=LOC727026 PE=4 SV=1		0.01	FALSE	2.817	22	1	6	1	67	7.4	7.64						0	2.1				0	0		0			0									1	1				1	1		1
FALSE	High	Master Protein	A0A087ZSF4	Uncharacterized protein OS=Apis mellifera OX=7460 GN=chb PE=4 SV=1	PREDICTED: Apis mellifera CLIP-associating protein 1-A (LOC410545), transcript variant X2, mRNA	0	FALSE	18.133	4	4	9	4	1301	144.9	9.42	2.56	0				0				1.87	1.91			0				4.39			1	1				1				1	1			1
FALSE	High	Master Protein	A0A087ZSF5	Uncharacterized protein OS=Apis mellifera OX=7460 GN=LOC408477 PE=4 SV=1		0	FALSE	14.901	25	5	48	5	185	22.4	9.74	7.58	4.33	0		0	5.12	3.68	5.23	1.61	0	0	2.57	2.81	1.85	0	4.97	1.67	6.41	6.5	4.96	4	3	2		1	3	3	3	1	2	1	2	2	2
FALSE	High	Master Protein	A0A087ZSI4	Uncharacterized protein OS=Apis mellifera OX=7460 PE=4 SV=1		0.001	FALSE	4.675	10	2	2	2	341	40.3	6.92							6.45																				2
FALSE	High	Master Protein	A0A087ZSL8	Uncharacterized protein OS=Apis mellifera OX=7460 PE=4 SV=1		0	FALSE	32.759	29	6	51	6	289	32.2	5.02	2.6	15.33	3.57			21.12	11.82	12.28		8.89	12.85	6.08	10.82	11.54	7.42		6.59	3.61			1	2	1			5	2	2		2	1	1	2	2
FALSE	High	Master Protein	A0A087ZSN2	Uncharacterized protein OS=Apis mellifera OX=7460 PE=3 SV=1	PREDICTED: Apis mellifera calcium-binding mitochondrial carrier protein Aralar1 (LOC408967), transcript variant X2, mRNA	0	FALSE	127.481	54	23	174	23	681	76	8.37	33.93	50.39	38.5	8.46	12.74	33.03	45.16	55.38	0	22.63	21.99	12	32.15	23.41	6.47	3.36	5.13	13.58	2.95		11	11	12	6	6	11	15	17	1	9	8	4	10	10
FALSE	High	Master Protein	A0A087ZSS8	Uncharacterized protein OS=Apis mellifera OX=7460 GN=LOC413912 PE=4 SV=1		0.001	FALSE	4.6	1	1	1	1	980	109.1	9.09																				2.68
FALSE	High	Master Protein	A0A087ZST6	Uncharacterized protein OS=Apis mellifera OX=7460 GN=LOC413724 PE=4 SV=1		0.003	FALSE	3.507	2	1	2	1	426	47.8	8.66											2.32	0																			1	1
FALSE	High	Master Protein	A0A087ZSU1	Uncharacterized protein OS=Apis mellifera OX=7460 PE=4 SV=1		0.001	FALSE	5.178	1	1	6	1	1393	159.7	6.37	0					2.07	1.76	0		0	1.7										1					1	1	1		1	1
FALSE	High	Master Protein	A0A087ZSY5	Uncharacterized protein OS=Apis mellifera OX=7460 PE=3 SV=1		0	FALSE	16.146	20	3	30	1	174	20.5	4.5	3.44	5.64		0	0	6.8	7.53	1.72		1.8	7.84	4.02	2.46	4.26	0			3.21	2.67	10.91	1	2		1	1	2	2	1		1	2	1	1	1
FALSE	High	Master Protein	A0A087ZT00	Uncharacterized protein OS=Apis mellifera OX=7460 PE=4 SV=1		0.004	FALSE	3.306	6	1	3	1	181	21.5	5.63								0					0	0														1					1	1
FALSE	High	Master Protein	A0A087ZT04	Uncharacterized protein OS=Apis mellifera OX=7460 GN=Cpap3-d PE=4 SV=1	Apis mellifera cuticular protein analogous to peritrophins 3-D (Cpap3-d), mRNA	0	FALSE	72.39	46	9	154	9	232	25.4	6.11	23.4	15.64	27.07	23.8	23.79	16.83	23.22	20.04	17.64	30.35	22.96	15.47	17.56	16.6	13.23	22.81	7.72	3.4	9.66	8.92	4	4	6	5	4	5	4	5	5	5	4	3	5	5
FALSE	High	Master Protein	A0A087ZT28	Uncharacterized protein OS=Apis mellifera OX=7460 GN=LOC409529 PE=4 SV=1	PREDICTED: Apis mellifera ras-like protein 2 (LOC409529), transcript variant X1, mRNA	0	FALSE	64.562	50	10	120	9	199	23	7.77	25.32	22.42	32.41	20.18	16.85	19.49	12.65	28.87	12.01	15.13	20.44	17.32	23.3	27.12	15.37	5.18	15.04	19.41	17.2	5.2	5	4	6	5	4	4	3	8	3	3	5	3	5	6
FALSE	High	Master Protein	A0A087ZT72	Uncharacterized protein OS=Apis mellifera OX=7460 GN=LOC725171 PE=4 SV=1	PREDICTED: Apis mellifera RNA-binding protein 33 (LOC725239), transcript variant X1, mRNA	0	FALSE	13.654	17	3	28	3	229	26.5	10.02	6.46	2.45	8.5	2.47	2.82	4.04	5.25	9.97		6.06	6.82		6.91	2.4	2.97						2	2	2	1	1	1	3	3		3	1		2	1
FALSE	High	Master Protein	A0A087ZT74	Uncharacterized protein OS=Apis mellifera OX=7460 GN=102654987 PE=4 SV=1		0	FALSE	61.859	67	12	134	10	206	23.1	5.68	21.11	17.51	13.17	16.34	17.25	30.46	23.72	28.99	8.51	15.84	24.13	21.98	23.06	33.22	22.02	20.54	5.47	24.17	2.23	10.41	5	3	4	6	7	6	6	5	2	3	4	3	3	5
FALSE	High	Master Protein	A0A087ZT78	Uncharacterized protein OS=Apis mellifera OX=7460 PE=4 SV=1		0	FALSE	9.206	5	2	3	2	854	97.4	6.93			0			3.45		3.25															1			1		1
FALSE	High	Master Protein	A0A087ZTC9	Uncharacterized protein OS=Apis mellifera OX=7460 PE=3 SV=1		0	FALSE	15.526	14	3	6	3	320	36.9	5.39						5.76					2.96					1.84		1.64		1.73						2					1
FALSE	High	Master Protein	A0A087ZTD7	Uncharacterized protein OS=Apis mellifera OX=7460 GN=725147 PE=4 SV=1		0.002	FALSE	4.248	16	1	8	1	56	6.6	9.82	1.77			1.77	5.46				1.71	1.76					1.75						1			1	1				1	1
FALSE	High	Master Protein	A0A087ZTD8	Uncharacterized protein OS=Apis mellifera OX=7460 GN=LOC552441 PE=4 SV=1		0.001	FALSE	4.587	6	1	7	1	158	17.9	9.2	2.62	2.84	2.66	1.73		2.81	2.67			2.31											1	1	1	1		1	1			1
FALSE	High	Master Protein	A0A087ZTI9	Uncharacterized protein OS=Apis mellifera OX=7460 GN=LOC408567 PE=3 SV=1		0	FALSE	88.383	43	14	185	14	417	46.5	8.31	48.44	22.56	16.88	4.89		64.95	40.68	16.39	14.5	4.23	52.07	38.54	34.6	40.65	25.06	36.8	28.16	35.22	24.42	13.27	10	7	7	3		14	9	5	3	1	11	10	9	8
FALSE	High	Master Protein	A0A087ZTS9	Uncharacterized protein OS=Apis mellifera OX=7460 PE=4 SV=1		0	FALSE	11.998	6	2	12	2	361	39.4	9.22	2.84	0				7.07	4.3			0	2.63			2.02				0			1	1				2	1			1	1			1
FALSE	High	Master Protein	A0A087ZTT0	Uncharacterized protein OS=Apis mellifera OX=7460 GN=LOC410690 PE=4 SV=1	PREDICTED: Apis mellifera haloacid dehalogenase-like hydrolase domain-containing 5 (LOC410690), mRNA	0	FALSE	31.582	26	6	20	6	394	44.2	7.77	9.35		1.75			3.36			0		12.1			2.84			4.76	3.24	1.65	3.7	3		1			1			1		4			1
FALSE	High	Master Protein	A0A087ZTW9	Uncharacterized protein OS=Apis mellifera OX=7460 PE=3 SV=1		0	FALSE	23.383	16	6	22	2	430	48.7	8.38	3.64	3.53		1.61		2.34			1.85		2.55	2.14	4.35			1.63	2.6	1.68	4.34	5.3	2	1		1		1			1		3	1	2
FALSE	High	Master Protein	A0A087ZTX6	Uncharacterized protein OS=Apis mellifera OX=7460 PE=4 SV=1	PREDICTED: Apis mellifera extensin (LOC102655819), mRNA	0	FALSE	409.041	46	31	1304	31	995	104.4	6.29	305.46	237.68	69.66	403.08	416.48	140.75	191.4	223.66	52.97	202.54	230.63	196.47	339.95	296.43	240.25	157.74	182.87	232.48	121.58	140.44	23	21	12	26	26	17	22	20	13	22	19	19	22	20
FALSE	High	Master Protein	A0A087ZTY7	Uncharacterized protein OS=Apis mellifera OX=7460 GN=Hsc70-5 PE=3 SV=1		0	FALSE	283.858	59	32	629	32	687	75.4	6.76	144.37	61.04	82.71	12.36	14.37	175.97	100.09	85.74	47.41	51.56	129.36	105.42	113.62	113.27	67.18	154.96	108.56	186.88	128.97	49.74	23	14	16	7	7	24	18	13	14	13	18	20	19	18
FALSE	High	Master Protein	A0A087ZTY8	Uncharacterized protein OS=Apis mellifera OX=7460 GN=LOC551732 PE=4 SV=1		0	FALSE	6.272	10	2	4	2	328	39	5.73						2.06					0	0														2					1	1
FALSE	High	Master Protein	A0A087ZU10	Uncharacterized protein OS=Apis mellifera OX=7460 PE=4 SV=1		0	FALSE	6.845	4	2	3	2	622	71.8	5.03	2.51										0									2.13	1										1
FALSE	High	Master Protein	A0A087ZU39	Uncharacterized protein OS=Apis mellifera OX=7460 GN=LOC725258 PE=3 SV=1	PREDICTED: Apis mellifera very-long-chain 3-oxoacyl-CoA reductase (LOC725258), transcript variant X2, mRNA	0	FALSE	84.59	52	15	287	15	326	35.7	9.29	32.16	53.28	65.53	34.5	24.07	30.83	36.02	47.11		15.56	34.52	26.32	37.47	38.77	20.32	24.66	9.14	85.75	30.45	18.61	9	9	12	9	8	8	9	9		5	7	6	8	10
FALSE	High	Master Protein	A0A087ZU42	Uncharacterized protein OS=Apis mellifera OX=7460 GN=LOC411141 PE=4 SV=1		0	FALSE	18.692	6	3	15	3	586	64.4	8.19	2.74		2.44	1.73		2.74	5.39	1.73	0		5.68	2.58	5.66		2.05						2		1	1		1	2	1	1		2	1	2
FALSE	High	Master Protein	A0A087ZU62	Uncharacterized protein OS=Apis mellifera OX=7460 GN=LOC411142 PE=3 SV=1		0.006	FALSE	2.893	3	1	1	1	397	44.2	8.28			0																				1
FALSE	High	Master Protein	A0A087ZU85	Uncharacterized protein OS=Apis mellifera OX=7460 GN=Ndufv2 PE=4 SV=1	PREDICTED: Apis mellifera NADH dehydrogenase [ubiquinone] flavoprotein 2, mitochondrial (LOC409793), mRNA	0	FALSE	73.558	53	10	119	10	243	27.4	8	16.02	13.39	38.26	23.35	24.92	21.48	13.34	23.86	23.74	8.44	11.64	10.91	18.93	11.53	16.25	11.61	7.66	12.15	15.6	12.67	4	3	7	4	4	5	4	6	7	3	4	3	4	3
FALSE	High	Master Protein	A0A087ZU87	Uncharacterized protein OS=Apis mellifera OX=7460 PE=3 SV=1	PREDICTED: Apis mellifera mitochondrial glutamate carrier 1 (LOC414011), transcript variant X1, mRNA	0	FALSE	42.657	49	9	65	9	244	26.2	9.44	8.77	7.05	14.77	6.72	7.06	10.36	13.07	12.78		7.4	10.4	5.08	13.69	4.92	11.98	2.56		4.96	2.14		4	3	6	3	3	4	5	5		3	3	2	5	2
FALSE	High	Master Protein	A0A087ZUB8	Uncharacterized protein OS=Apis mellifera OX=7460 GN=Adk1 PE=3 SV=1	Apis mellifera adenylate kinase 1 (Adk1), mRNA	0	FALSE	17.134	26	4	11	4	192	21.9	6.37				0		5.21		0			4.88		0	0		2.4								1		2		1			2		1	1
FALSE	High	Master Protein	A0A087ZUE1	Uncharacterized protein OS=Apis mellifera OX=7460 PE=4 SV=1		0.001	FALSE	5.089	2	1	3	1	678	76.9	6.24							3.81				2.13																1				1
FALSE	High	Master Protein	A0A087ZUE4	Uncharacterized protein OS=Apis mellifera OX=7460 PE=3 SV=1	PREDICTED: Apis mellifera bifunctional coenzyme A synthase (LOC552104), mRNA	0	FALSE	11.541	15	3	11	3	315	36.4	7.01	2.37					2.25					3.8	6.11	2.08	2.02		0		0			1					2					2	2	1	1
FALSE	High	Master Protein	A0A087ZUH2	Uncharacterized protein OS=Apis mellifera OX=7460 GN=LOC412806 PE=4 SV=1		0	FALSE	7.537	15	2	5	2	140	15	9.91	1.61		0		0											2.77				2.52	1		1		1
FALSE	High	Master Protein	A0A087ZUH7	Uncharacterized protein OS=Apis mellifera OX=7460 GN=LOC724749 PE=4 SV=1		0	FALSE	138.699	29	21	117	21	1311	143.2	8.98	48.48		2.43	47.05	60.9	23.33	0	4.36	57.67	3.89	2.39	3.63	25.51	13.64	1.65	2.09	1.82	4.4	12.16		12		1	14	16	8	1	2	16	3	1	2	8	4
FALSE	High	Master Protein	A0A087ZUH9	Uncharacterized protein OS=Apis mellifera OX=7460 GN=CNOT1 PE=4 SV=1		0	FALSE	6.854	1	1	2	1	2402	269.6	7.08											3.15	3.17																			1	1
FALSE	High	Master Protein	A0A087ZUJ1	Uncharacterized protein OS=Apis mellifera OX=7460 PE=3 SV=1		0	FALSE	6.758	1	1	8	1	2299	261.6	8.97																	19.49		2.09
FALSE	High	Master Protein	A0A087ZUL8	Uncharacterized protein OS=Apis mellifera OX=7460 GN=RpS15 PE=3 SV=1	PREDICTED: Apis mellifera 40S ribosomal protein S15 (LOC551644), mRNA	0	FALSE	74.659	55	5	143	5	147	16.9	10.37	25.49	20.68	12.88	9.28	12.57	29.33	35.43	27.14	16.47	15.16	35.89	34.98	20.92	14.01	11.77	26.9	11.83	14.73	5.36	12.61	3	3	2	1	3	3	4	4	4	4	4	4	4	3
FALSE	High	Master Protein	A0A087ZUQ1	Uncharacterized protein OS=Apis mellifera OX=7460 GN=LOC552638 PE=4 SV=1	PREDICTED: Apis mellifera myosin regulatory light chain sqh (LOC550973), mRNA	0	FALSE	19.146	22	3	9	3	173	19.9	4.91						3.58					3.02				2.46	6.06	5.28	4.61		2.34						1					1
FALSE	High	Master Protein	A0A087ZUR2	Uncharacterized protein OS=Apis mellifera OX=7460 PE=4 SV=1	PREDICTED: Apis mellifera cuticular protein 10 (LOC100579047), mRNA	0	FALSE	37.868	21	3	56	3	202	22.3	5.73	9.15	7.45	9.81	16.17	7.17	10.56	3.84	6.7	6.5	10.22	13.86	4.18	12.64	10.24	7.25	6.36	3.02	11.6	0	3.83	1	1	2	3	1	1	1	2	1	2	2	1	2	2
FALSE	High	Master Protein	A0A087ZUS7	Uncharacterized protein OS=Apis mellifera OX=7460 GN=LOC409002 PE=4 SV=1		0	FALSE	12.171	26	2	4	2	174	18.6	9.29					6.33					6.9															2					2
FALSE	High	Master Protein	A0A087ZUS8	Uncharacterized protein OS=Apis mellifera OX=7460 GN=100578625 PE=4 SV=1		0	FALSE	21.515	38	4	8	4	166	17.7	9.55				2.34	19.3																			1	4
FALSE	High	Master Protein	A0A087ZUU1	Uncharacterized protein OS=Apis mellifera OX=7460 GN=CPR25 PE=4 SV=1		0	FALSE	22.513	13	2	1534	2	268	25.1	5.2	171.55	146.54	486.11	424.27	419.27	102.58	97.38	182.9	110.49	206.14	65.88	76.39	181.54	98.39	153.34	87.73	73.86	338.14	304.84	205.4	1	1	2	1	1	1	1	1	2	1	1	1	1	1
FALSE	High	Master Protein	A0A087ZUV0	Uncharacterized protein OS=Apis mellifera OX=7460 GN=LOC726750 PE=4 SV=1	PREDICTED: Apis mellifera fibroin heavy chain (LOC726750), transcript variant X2, mRNA	0	FALSE	12.672	1	2	10	2	1483	136.8	6.05			3.1	0	5.68			3.43		6.33			3.17										1	1	1			1		2			1
FALSE	High	Master Protein	A0A087ZUY0	Uncharacterized protein OS=Apis mellifera OX=7460 PE=4 SV=1		0	FALSE	30.512	10	6	15	6	756	87.3	5.95	4.17	5.42				9.67	4.34				5.63			2.86		2.06	6.37	5.36			1	2				3	1				2			1
FALSE	High	Master Protein	A0A087ZUY6	Uncharacterized protein OS=Apis mellifera OX=7460 GN=Pka-R1 PE=4 SV=1		0	FALSE	44.896	34	7	14	7	321	35.5	4.93	2.74			0		11.77			2.82		3.04					3.16	4.67			9.68	1			1		3			2		1
FALSE	High	Master Protein	A0A087ZV03	Uncharacterized protein OS=Apis mellifera OX=7460 GN=LOC412276 PE=4 SV=1		0	FALSE	32.958	37	7	36	7	297	33.3	9.06	8.07	2.81	2.15			15.88	2.43	5.58	0		0	4.49	10.05	4.31	0		3.62	0			4	1	2			5	2	3	2		2	2	3	4
FALSE	High	Master Protein	A0A087ZV19	Uncharacterized protein OS=Apis mellifera OX=7460 GN=La PE=4 SV=1		0	FALSE	35.005	23	7	21	7	404	46.9	6.16	3.14					18.08			0		12.88			2.18		5.35	6.01		0	1.87	1					4			1		4			1
FALSE	High	Master Protein	A0A087ZV22	Uncharacterized protein OS=Apis mellifera OX=7460 GN=RpL35A PE=3 SV=1		0	FALSE	38.879	40	9	106	9	146	16.7	10.98	21.27	6.75	6.72	8.26	9.22	15.39	18.9	16.55	1.74	17.43	6.29	4.48	3.46	2.22	3.51	8.44	0	11.9	4.54		6	4	3	3	4	4	5	6	1	6	4	2	2	3
FALSE	High	Master Protein	A0A087ZV41	Uncharacterized protein OS=Apis mellifera OX=7460 PE=4 SV=1		0	FALSE	125.173	39	16	216	16	497	57.1	6.2	44.55	30.31	21.39	13.7	12.63	68.46	42.19	20.63	9.74	2.36	78.45	45.79	22.04	42.74	16.99	27.12	16.65	20.98	6.49	13	9	7	7	5	4	12	10	6	7	1	13	11	6	10
FALSE	High	Master Protein	A0A087ZV73	Uncharacterized protein OS=Apis mellifera OX=7460 GN=724873 PE=4 SV=1	PREDICTED: Apis mellifera ras-related protein Rab-7a (LOC724873), mRNA	0	FALSE	67.211	65	11	67	11	207	23.2	6.06	9.85	6.39	13.33	4.13	2.48	16.33	16.6	14.91		12.12	13.41	8.73	14.73	2.67	3.96	9.66	6.22	27.82	7.11	11.05	3	2	4	2	1	4	4	4		4	4	3	5	1
FALSE	High	Master Protein	A0A087ZV81	Uncharacterized protein OS=Apis mellifera OX=7460 PE=4 SV=1		0	FALSE	50.493	13	9	16	9	1029	109.5	4.86	5.52					6.08					12.77					2.33	13.69	3.28	2.23		2					2					4
FALSE	High	Master Protein	A0A087ZV93	Uncharacterized protein OS=Apis mellifera OX=7460 GN=LOC411923 PE=3 SV=1	PREDICTED: Apis mellifera alanine--tRNA ligase, cytoplasmic (LOC411923), transcript variant X1, mRNA	0	FALSE	42.691	13	11	38	10	1194	135.1	6.83	2.27	2.12			1.75	10.21	4.82	2.55		0	6.08	1.72	3.49	5.13		2.15	7.49	6.36	3.49	1.69	1	1			1	4	3	1		1	3	1	1	2
FALSE	High	Master Protein	A0A087ZVA0	Uncharacterized protein OS=Apis mellifera OX=7460 GN=LOC725076 PE=4 SV=1		0	FALSE	21.107	23	3	38	3	155	17	8.22	2.21	12.43				10.4	15.98	4.59			2.41	2.61	0	2.16		0	4.75	6		2.68	1	3				3	3	2			2	2	1	2
FALSE	High	Master Protein	A0A087ZVA1	Uncharacterized protein OS=Apis mellifera OX=7460 GN=BicD PE=4 SV=1		0	FALSE	6.456	3	2	19	1	777	89.2	5.33	1.96	2.14	1.71		1.79	2.15	1.84	2		1.66	2.02	1.62	1.77	1.76	3.44	2.04	2.46	2.14	1.8		1	1	1		1	1	1	1		1	1	1	1	1
FALSE	High	Master Protein	A0A087ZVA6	Uncharacterized protein OS=Apis mellifera OX=7460 PE=4 SV=1	PREDICTED: Apis mellifera microtubule-associated protein RP/EB family member 1 (LOC411371), transcript variant X1, mRNA	0	FALSE	33.326	24	8	29	8	435	49.3	6.79			0	0	0	3.36		0	0		10.34		0	0	0	7.53	14.6	7.29		5.06			1	1	2	2		1	1		3		1	1
FALSE	High	Master Protein	A0A087ZVB1	Uncharacterized protein OS=Apis mellifera OX=7460 PE=4 SV=1		0	FALSE	124.266	52	11	1203	11	180	21.8	10.42	143.22	117.97	111.71	110.9	118.7	126.14	98.09	109.73	130.38	108.82	107.49	85.36	114.92	105.09	91.32	249.63	89.8	299.21	364.66	24.18	9	9	9	9	9	9	9	9	10	9	9	8	8	10
FALSE	High	Master Protein	A0A087ZVB2	Uncharacterized protein OS=Apis mellifera OX=7460 PE=4 SV=1		0	FALSE	199.06	74	14	886	14	164	19.2	9.83	171.83	127.51	136.88	142.98	126.74	158.65	139.6	162.29	106.27	160.18	154.9	120.94	153.9	151.63	129.6	119.69	63.46	71.95	70.9	9.71	11	8	12	11	12	11	10	12	11	12	9	10	10	13
FALSE	High	Master Protein	A0A087ZVB3	Uncharacterized protein OS=Apis mellifera OX=7460 GN=LOC409602 PE=4 SV=1	PREDICTED: Apis mellifera circadian clock-controlled protein (LOC409602), mRNA	0.002	FALSE	3.719	5	1	1	1	245	28	5.12																				2.1
FALSE	High	Master Protein	A0A087ZVB4	Uncharacterized protein OS=Apis mellifera OX=7460 PE=4 SV=1		0.002	FALSE	4.135	12	1	15	1	113	12.9	6.77	2.54		2.42	2.06	4.59	2.12	0	2.65	0	2.48	0		2.55	2.32	2.18						1		1	1	1	1	1	1	1	1	1		1	1
FALSE	High	Master Protein	A0A087ZVB6	Uncharacterized protein OS=Apis mellifera OX=7460 GN=LOC726981 PE=4 SV=1		0.001	FALSE	5.662	9	1	3	1	249	27.7	6.58	2.43							0						3.07							1							1						1
FALSE	High	Master Protein	A0A087ZVF1	Uncharacterized protein OS=Apis mellifera OX=7460 PE=4 SV=1		0	FALSE	7.973	13	1	24	1	84	9.9	5.87	1.94	2.25				2.25	4.2	4.46	0	0	1.96	3.61	1.61	1.78	0	1.92		4.28	1.7		1	1				1	1	1	1	1	1	1	1	1
FALSE	High	Master Protein	A0A087ZVG0	Uncharacterized protein OS=Apis mellifera OX=7460 PE=3 SV=1	PREDICTED: Apis mellifera very long-chain specific acyl-CoA dehydrogenase, mitochondrial (LOC412025), mRNA	0	FALSE	124.858	41	23	234	23	613	68.3	7.4	27.93	34.02	33.72	1.66	16.56	46.63	42.88	48.26	1.97	16.41	36.58	15.9	20.99	25.1	18.57	8.56	12.59	24.41	16.27	26.76	13	12	14	2	9	15	16	16	1	8	13	8	8	11
FALSE	High	Master Protein	A0A087ZVG6	Uncharacterized protein OS=Apis mellifera OX=7460 GN=726030 PE=4 SV=1	PREDICTED: Apis mellifera transmembrane protein 214-A (LOC726030), mRNA	0	FALSE	30.654	12	6	29	6	675	77.6	9.19	2.54	6.03	6.22			3.2	15.37	7.7	0		5.29	4.22	8.44	5.69	7.7			7.29	1.63		1	3	2			1	4	3	1		1	1	1	2
FALSE	High	Master Protein	A0A087ZVI0	Uncharacterized protein OS=Apis mellifera OX=7460 GN=eEF1delta PE=3 SV=1	PREDICTED: Apis cerana probable elongation factor 1-delta (LOC108003967), transcript variant X2, mRNA	0	FALSE	26.716	17	5	21	5	426	48.1	5.95		2.64	2.4			8.6	6.19	2.53	1.62	2.51	16.63			2.62		6		4.12	0			1	1			3	2	1	1	1	4			1
FALSE	High	Master Protein	A0A087ZVI4	Uncharacterized protein OS=Apis mellifera OX=7460 PE=4 SV=1	PREDICTED: Apis mellifera bruchpilot (brp), transcript variant X1, mRNA	0.005	FALSE	3.092	1	1	18	1	2208	254.4	6.79	4.71					2.61	5.02	2.01		2.3	2.02		0	2.37		0		2.26			1					1	1	1		1	1		1	1
FALSE	High	Master Protein	A0A087ZVJ9	Uncharacterized protein OS=Apis mellifera OX=7460 GN=Rab6 PE=4 SV=1	PREDICTED: Apis mellifera ras-related protein Rab6 (LOC409004), transcript variant X2, mRNA	0	FALSE	26.583	31	5	59	4	209	23.6	5.53	7.9	6.05	10.08	2.76	6.7	8.62	8.49	6.72	6.86	14.35	11.69	4.58	5.31	14.04	4.98		3.06	11.06	8.81	8.78	3	3	4	2	3	3	3	2	2	4	3	1	2	3
FALSE	High	Master Protein	A0A087ZVL8	Uncharacterized protein OS=Apis mellifera OX=7460 GN=100576161 PE=4 SV=1	Uncharacterized protein OS=Apis mellifera OX=7460 GN=100576161 PE=4 SV=1	0.001	FALSE	5.245	44	1	6	1	89	9.5	8.1				0	0																			1	1
FALSE	High	Master Protein	A0A087ZVM1	Uncharacterized protein OS=Apis mellifera OX=7460 GN=100576192 PE=4 SV=1		0	FALSE	7.707	5	2	4	2	472	52.6	8.35			1.79	0	1.81													1.96					1	1	1
FALSE	High	Master Protein	A0A087ZVN6	Uncharacterized protein OS=Apis mellifera OX=7460 GN=Nipsnap PE=4 SV=1	PREDICTED: Apis mellifera protein NipSnap (LOC409442), mRNA	0	FALSE	40.592	30	7	43	7	283	33	9.47	10.13	3.4	8.86	3.22	2.52	17.1	6.28	7.98	10.72		11.62	3.99	7.66	18.87	8.33	2.4	3.04		4.9	6.18	2	1	3	1	1	4	1	1	2		2	1	1	5
FALSE	High	Master Protein	A0A087ZVP7	Uncharacterized protein OS=Apis mellifera OX=7460 GN=Cox4I1 PE=4 SV=1	PREDICTED: Apis mellifera cytochrome c oxidase subunit 4 isoform 1, mitochondrial (LOC412396), mRNA	0	FALSE	54.4	52	9	261	9	168	19.1	9.35	33.72	30.42	32.73	20.58	18.75	33.91	19.48	31.45	19.3	27.04	32.11	20.93	30.54	24.92	19.74	31.02	22.99	102.15	104.96	4.38	5	5	6	5	4	5	4	4	4	4	4	4	4	3
FALSE	High	Master Protein	A0A087ZVR2	Uncharacterized protein OS=Apis mellifera OX=7460 GN=Rab10 PE=4 SV=1		0	FALSE	23.684	27	5	78	3	200	22.9	7.4	13.85	5.99	5.48	11.8	7.83	11.1	8.06	17.15	5.04	6.22	8.85	6.12	11.41	18.98	11.86	6.53	5.56	14.92	8.28	10.1	4	2	2	3	2	3	3	3	1	1	3	2	3	3
FALSE	High	Master Protein	A0A087ZVS0	Uncharacterized protein OS=Apis mellifera OX=7460 GN=LOC724676 PE=3 SV=1	PREDICTED: Apis mellifera ADP-ribosylation factor-like protein 1 (LOC724676), transcript variant X1, mRNA	0	FALSE	9.324	10	1	3	1	180	20.2	7.14						3.77	6.1																			1	1
FALSE	High	Master Protein	A0A087ZVS9	Uncharacterized protein OS=Apis mellifera OX=7460 GN=GstT1 PE=3 SV=1	PREDICTED: Apis mellifera glutathione S-transferase theta-3 (LOC552314), mRNA	0	FALSE	28.025	28	5	28	5	230	27.2	8.7	4.71	3.43	1.8	7.8	0	1.62	2.58				3.19		0	2.5	2.22	6.42		10.19	2.7	6.91	3	1	2	3	2	1	2				2		1	2
FALSE	High	Master Protein	A0A087ZVT8	Uncharacterized protein OS=Apis mellifera OX=7460 PE=4 SV=1	PREDICTED: Apis mellifera ras-related protein Rab-5C (LOC100577764), transcript variant X3, mRNA	0	FALSE	36.706	30	4	26	4	179	19.9	6	7.44		9.01			7.6	5.51	6.76		2.89	10.08		2.84	7.54	8.93	4.12	3.71	3.93	2.21	3.27	2		3			1	2	2		1	3		1	2
FALSE	High	Master Protein	A0A087ZVW2	Uncharacterized protein OS=Apis mellifera OX=7460 GN=LOC551126 PE=4 SV=1	PREDICTED: Apis mellifera protein FAM162B (LOC551126), mRNA	0	FALSE	18.841	22	3	10	3	161	18.6	9.96						8.48	4.45	3.85	2.53		4.17		4.6	3.49	3.56	0										2	1	1	1		1		1	1
FALSE	High	Master Protein	A0A087ZVZ6	Uncharacterized protein OS=Apis mellifera OX=7460 GN=725851 PE=3 SV=1		0	FALSE	690.935	98	37	9913	4	332	37.3	5.55	1771.33	1575.15	1458.42	609.55	629	2064.25	1482.57	1708.39	741.24	1290.87	1686.85	1374.83	1764.31	1578.08	1124.76	2909.35	1052.12	2874.18	1741.27	2605.16	21	17	22	19	20	23	22	22	22	20	18	17	19	22
FALSE	High	Master Protein	A0A087ZW06	Uncharacterized protein OS=Apis mellifera OX=7460 PE=4 SV=1		0	FALSE	22.164	27	4	6	4	324	34.8	9.63						3.23					0			3.81		2.84	0	3.35								1					1			1
FALSE	High	Master Protein	A0A087ZW63	Uncharacterized protein OS=Apis mellifera OX=7460 PE=4 SV=1		0	FALSE	15.327	29	3	22	3	143	17.1	8.16	3.59	5.14				5.18	5.93	10.13		3.35	3.94	3.07	5.79	6.33	0	3.57			0	3.57	1	2				1	2	3		1	1	1	2	2
FALSE	High	Master Protein	A0A087ZW77	Uncharacterized protein OS=Apis mellifera OX=7460 GN=LOC552459 PE=4 SV=1	PREDICTED: Apis mellifera glycine-rich cell wall structural protein (LOC552459), transcript variant X10, mRNA	0	FALSE	90.279	18	6	93	6	663	52.7	9.01	14.02		15.92	31.53	17	25.75		29.05	28.4	12	5.85		44.4	9		37.81	30.71	13.89	13.47	2.74	1		2	5	2	3		4	5	2	2		4	2
FALSE	High	Master Protein	A0A087ZW78	Uncharacterized protein OS=Apis mellifera OX=7460 GN=LOC413091 PE=4 SV=1		0	FALSE	19.484	6	4	15	4	916	104.3	5.59	2.46	3.25				6.37	2.99				4.99			2.47		2.05	4.7	4.71			1	1				2	1				1			1
FALSE	High	Master Protein	A0A087ZWA8	Uncharacterized protein OS=Apis mellifera OX=7460 GN=LOC552804 PE=4 SV=1		0	FALSE	7.354	4	1	1	1	524	59.8	5.26						3.92																				1
FALSE	High	Master Protein	A0A087ZWC1	Uncharacterized protein OS=Apis mellifera OX=7460 GN=NUP205 PE=4 SV=1	PREDICTED: Apis mellifera nuclear pore complex protein Nup205 (LOC411918), mRNA	0	FALSE	14.555	3	4	4	4	1918	219.2	6.6		0														1.84				5.54		1
FALSE	High	Master Protein	A0A087ZWC4	Uncharacterized protein OS=Apis mellifera OX=7460 GN=cib PE=4 SV=1	PREDICTED: Apis mellifera thymosin beta (LOC551528), transcript variant X2, mRNA	0	FALSE	8.658	11	1	2	1	166	18.5	5.62							3.34										4.55										1
FALSE	High	Master Protein	A0A087ZWD2	Uncharacterized protein OS=Apis mellifera OX=7460 GN=LOC409265 PE=4 SV=1		0	FALSE	8.713	4	3	15	3	705	80.4	8.25		1.6	0			1.62	5.61	3.49		0	1.84	1.89			1.72					0		1	1			1	3	2		1	1	1
FALSE	High	Master Protein	A0A087ZWD4	Uncharacterized protein OS=Apis mellifera OX=7460 PE=4 SV=1	PREDICTED: Apis mellifera probable chitinase 10 (LOC412273), transcript variant X1, mRNA	0	FALSE	17.819	3	5	9	5	2660	301.4	6.98	3.45			2.73	0						2.68					2.39		2.85	2.39		1			3	1						1
FALSE	High	Master Protein	A0A087ZWD6	Uncharacterized protein OS=Apis mellifera OX=7460 GN=102656587 PE=4 SV=1	PREDICTED: Apis mellifera ras-related protein Ral-a (LOC102656587), transcript variant X1, mRNA	0	FALSE	38.428	32	7	74	7	201	22.9	7.88	19.48	5.44	4.04	2.9	9.35	17.15	8.6	6.3	2.92	1.74	9.2	6.02	6.87	9.28	3.34	5.72	18.93	10.52	2.96	2.99	5	2	2	2	4	5	4	2	2	1	3	2	2	3
FALSE	High	Master Protein	A0A087ZWD9	Uncharacterized protein OS=Apis mellifera OX=7460 GN=100578159 PE=4 SV=1		0	FALSE	10.564	2	2	13	2	1244	144.2	8.94	4.25	3.58				0	3.62	3.3		2.98	2.87										1	1				1	2	2		2	2
FALSE	High	Master Protein	A0A087ZWE0	Uncharacterized protein OS=Apis mellifera OX=7460 GN=LOC409870 PE=4 SV=1	PREDICTED: Apis mellifera minor histocompatibility antigen H13 (LOC409870), mRNA	0	FALSE	15.738	12	4	33	4	373	41.6	6.79	4.17	7.56	7.64	0	0	3.4		6.8		3.27	5.16	2.04	0		3.83			5.28		1.62	3	4	4	2	1	2		2		2	2	1	1
FALSE	High	Master Protein	A0A087ZWE7	Uncharacterized protein OS=Apis mellifera OX=7460 PE=4 SV=1		0.002	FALSE	4.249	18	1	5	1	71	8.2	8.16			4.34								3.05		3.29	2.83									1								1		1	1
FALSE	High	Master Protein	A0A087ZWE8	Uncharacterized protein OS=Apis mellifera OX=7460 GN=100578976 PE=4 SV=1		0	FALSE	8.53	7	2	11	2	370	42.2	8.63		4.78	2.08			0	2.25					2.56	2.04	2.34	0							2	2			1	1					1	1	1
FALSE	High	Master Protein	A0A087ZWF7	Uncharacterized protein OS=Apis mellifera OX=7460 PE=4 SV=1	PREDICTED: Apis mellifera alpha-actinin, sarcomeric (LOC725782), transcript variant X6, mRNA	0	FALSE	615.289	71	65	2471	65	850	98.1	5.74	344.26	455.2	184.61	321.25	398.64	352.24	437.98	257.87	324.49	388.57	312.53	335.51	306.85	314.53	278.58	408.8	302.57	183.19	396.42	642.34	49	52	38	52	51	46	51	43	49	51	42	43	46	44
FALSE	High	Master Protein	A0A087ZWM1	Uncharacterized protein OS=Apis mellifera OX=7460 PE=4 SV=1		0	FALSE	9.588	5	2	10	2	486	55	8.54		5.44	1.82				3.92	2.33			2.09		2.31		1.85							2	2				1	1			1		2
FALSE	High	Master Protein	A0A087ZWM2	Uncharacterized protein OS=Apis mellifera OX=7460 GN=CtBP PE=3 SV=1		0	FALSE	16.614	10	3	5	3	472	49.7	7.09						3.68										3.4		3.19	2.13	1.93						1
FALSE	High	Master Protein	A0A087ZWN6	Uncharacterized protein OS=Apis mellifera OX=7460 PE=4 SV=1	PREDICTED: Apis mellifera amphiphysin (LOC409851), transcript variant X1, mRNA	0	FALSE	160.013	62	16	404	16	385	43.7	5.45	77.22	76.02	46.96	49.68	54.86	95.3	92.09	58.75	82.86	54.71	86.22	75.58	62.45	65.04	46.04	57.65	89.28	37.19	63.18	18.35	11	11	7	10	11	13	12	9	12	11	13	11	11	12
FALSE	High	Master Protein	A0A087ZWN8	Uncharacterized protein OS=Apis mellifera OX=7460 PE=4 SV=1		0	FALSE	93.061	32	11	88	11	432	50.6	5.08	12.44	15.33	6.77	2.11	2.31	20.29	15.48	11.25	5.26	3.35	21.23	16.13	17.6	10.2	7.45	7.07	14.91	8.61	7.59	18.08	5	5	4	1	1	5	5	4	2	2	5	4	5	3
FALSE	High	Master Protein	A0A087ZWQ4	Uncharacterized protein OS=Apis mellifera OX=7460 PE=4 SV=1		0	FALSE	76.926	20	10	105	10	433	47.3	7.64	20.51	15.33	4.04	3.61	10.65	36.62	17.42	22.82	11.9	22.12	29.58	15.16	3.52	12.22	11.85	18.91	16.71	8.62	2.08		5	4	1	2	4	7	4	4	4	5	6	3	1	3
FALSE	High	Master Protein	A0A087ZWQ5	Uncharacterized protein OS=Apis mellifera OX=7460 GN=rin PE=4 SV=1	PREDICTED: Apis mellifera ras GTPase-activating protein-binding protein 2 (LOC551602), mRNA	0	FALSE	58.174	20	6	31	6	614	67.9	6.54	15.92	4.77				21.97	6.31				20.55	8.58	4.68	3.57		6.5	5.97	9.62			4	2				4	2				5	2	1	2
FALSE	High	Master Protein	A0A087ZWV6	Uncharacterized protein OS=Apis mellifera OX=7460 GN=727578 PE=4 SV=1		0	FALSE	55.491	28	7	96	7	327	37.9	9.23	15.74	9.3	30.5	11.92	12.5	12.15	18.25	18.41	24.8	8.78	14.08	10.49	14.34	16.24	12.98		2.05	0	4.21		2	1	5	4	4	3	3	4	6	2	2	2	2	2
FALSE	High	Master Protein	A0A087ZX01	Uncharacterized protein OS=Apis mellifera OX=7460 GN=LOC408876 PE=4 SV=1		0.002	FALSE	4.118	6	1	1	1	286	31.8	6.52						2.65																				1
FALSE	High	Master Protein	A0A087ZX19	Uncharacterized protein OS=Apis mellifera OX=7460 GN=100578624 PE=3 SV=1		0	FALSE	25.234	25	5	6	5	306	34.4	7.83						9.77					3.7								4.56	0						2					1
FALSE	High	Master Protein	A0A087ZX44	Uncharacterized protein OS=Apis mellifera OX=7460 PE=3 SV=1	PREDICTED: Apis mellifera calpain-B (Calpb), transcript variant X1, mRNA	0	FALSE	56.218	24	11	32	11	758	88.1	4.91	15.95	1.87				28.53	3.42	2.06			5.78			5.8		7.91	1.69	3.82	3.56	6.79	4	1				6	1	1			2			2
FALSE	High	Master Protein	A0A087ZX60	Uncharacterized protein OS=Apis mellifera OX=7460 GN=LOC413869 PE=4 SV=1	PREDICTED: Apis mellifera retinol dehydrogenase 11 (LOC413869), mRNA	0	FALSE	8.494	14	3	4	3	326	36.7	9.23								4.83		2.22					0													2		1
FALSE	High	Master Protein	A0A087ZX74	Uncharacterized protein OS=Apis mellifera OX=7460 GN=102654955 PE=4 SV=1	PREDICTED: Apis mellifera ATP synthase subunit b, mitochondrial (LOC102654955), mRNA	0	FALSE	161.315	71	20	432	20	238	27.8	7.43	51	80.33	86.7	24.45	39.96	60.29	86.94	75.06	18.83	45.12	82.01	66.7	89.32	55.36	46.53	53.79	25.96	33.03	19.51	30.41	10	9	13	6	8	9	11	12	6	7	11	7	15	9
FALSE	High	Master Protein	A0A087ZX89	Uncharacterized protein OS=Apis mellifera OX=7460 PE=4 SV=1	PREDICTED: Apis mellifera hemicentin-2 (LOC412893), transcript variant X1, mRNA	0	FALSE	60.373	10	14	117	14	1695	189.8	8.28	8.96	10.73	19.68	6.11	5.46	13.7	6.53	21.17		10.62	9.32	8.65	22.7	17.17	13.11	9.66	2.2	7.83	6.46	10.12	6	5	7	4	4	5	5	6		4	4	3	8	6
FALSE	High	Master Protein	A0A087ZX94	Uncharacterized protein OS=Apis mellifera OX=7460 GN=LOC411483 PE=4 SV=1		0	FALSE	16.994	6	3	10	3	768	86.9	6.7		0				0	3.98				5.43	2.27	2.01	0								1				1	2				2	1	1	1
FALSE	High	Master Protein	A0A087ZXC7	Uncharacterized protein OS=Apis mellifera OX=7460 PE=4 SV=1	PREDICTED: Apis mellifera pentatricopeptide repeat-containing protein 2, mitochondrial (LOC552071), mRNA	0	FALSE	151.458	66	19	371	19	311	36.9	7.83	78.24	53.41	84.64	36.69	39.19	88.68	77.03	44.72	14.77	34.97	92.93	66.28	76.95	63.26	62.22	27.18	7.58	15.01	11.6	18.78	11	11	11	8	8	14	12	9	8	8	15	8	12	13
FALSE	High	Master Protein	A0A087ZXE3	Uncharacterized protein OS=Apis mellifera OX=7460 PE=4 SV=1		0	FALSE	28.086	36	4	49	4	132	15	10.14	11.34	8.82	9.87	5.99	8.73	10.91	11.95	4.11	0	6.74	11.41	8.29	6.24	10.27	7.27	4.17		2.1	1.89	2.95	2	2	3	3	2	2	2	1	1	2	2	2	2	2
FALSE	High	Master Protein	A0A087ZXE4	Uncharacterized protein OS=Apis mellifera OX=7460 PE=3 SV=1	PREDICTED: Apis mellifera 60S ribosomal protein L3 (LOC552445), mRNA	0	FALSE	95.776	45	15	264	15	311	35.4	10.15	51.32	47.31	31.75	31.59	23.4	64.37	52.11	57.31	4.76	38.87	54.85	47.47	35.13	43.31	35.59	30.68	32.63	23.82	10.63	7.77	10	11	8	8	7	12	11	12	3	11	10	9	8	9
FALSE	High	Master Protein	A0A087ZXF7	Uncharacterized protein OS=Apis mellifera OX=7460 PE=3 SV=1	PREDICTED: Apis mellifera collagen alpha-1(IV) chain (LOC725926), transcript variant X1, mRNA	0	FALSE	11.122	3	1	6	1	791	86.8	8.22							2.62				3.46		0	0			5.51										1				1		1	1
FALSE	High	Master Protein	A0A087ZXF8	Uncharacterized protein OS=Apis mellifera OX=7460 PE=4 SV=1	PREDICTED: Apis mellifera collagen alpha-1(IV) chain (LOC725926), transcript variant X2, mRNA	0	FALSE	61.489	34	8	74	8	348	36.4	9.04				22.01	6.52	23.64		18.46	15.09	39.61	10.81		0	9.8	7.38	37.96			19.76					4	2	4		5	6	6	4		1	3
FALSE	High	Master Protein	A0A087ZXG4	Uncharacterized protein OS=Apis mellifera OX=7460 PE=4 SV=1	PREDICTED: Apis mellifera mucin-19 (LOC102653655), transcript variant X1, mRNA	0	FALSE	311.238	25	40	604	40	2420	253	6.6	123.54	65.47	88.05	155.6	180.18	59.28	72.21	84.17	150.88	94.08	96.38	42.68	93.3	66.26	45.34	81	67.81	78.54	78.86	13.18	22	11	19	27	29	14	14	15	29	19	17	12	19	12
FALSE	High	Master Protein	A0A087ZXI6	Uncharacterized protein OS=Apis mellifera OX=7460 PE=4 SV=1		0.005	FALSE	2.97	7	1	2	1	121	13.3	9.22																1.75		0
FALSE	High	Master Protein	A0A087ZXI7	Uncharacterized protein OS=Apis mellifera OX=7460 PE=4 SV=1		0	FALSE	70.536	14	10	31	10	1312	150.8	8.98	10.45	2.09			2.12	7.41	4.99			2.17	12.14		2.17	4.4	2.07	13.17	7.1	5.13	1.71		3	1			1	2	2			2	2		1	2
FALSE	High	Master Protein	A0A087ZXJ6	Uncharacterized protein OS=Apis mellifera OX=7460 PE=3 SV=1	PREDICTED: Apis mellifera unconventional myosin-XV (LOC408444), transcript variant X4, mRNA	0	FALSE	82.049	10	14	70	14	2112	238.5	9.32	24.21	9.83	0		10.17	25.62	20.08	22.1		21.73	16.59	13.64	26.23	10.98	6.1	5.83	3.26	11.12	5.49		4	3	1		4	5	3	6		6	4	5	6	3
FALSE	High	Master Protein	A0A087ZXJ7	Uncharacterized protein OS=Apis mellifera OX=7460 PE=4 SV=1	PREDICTED: Apis mellifera unconventional myosin-XV (LOC408444), transcript variant X1, mRNA	0	FALSE	19.072	8	4	6	4	885	100.2	9.36											5.56			0		1.91	1.82		1.96												2			1
FALSE	High	Master Protein	A0A087ZXJ8	Uncharacterized protein OS=Apis mellifera OX=7460 PE=4 SV=1	PREDICTED: Apis mellifera unconventional myosin-XV (LOC408444), transcript variant X1, mRNA	0	FALSE	60.734	11	9	58	9	1089	124.8	8.54	6.98	4.79	0	2.2	4.28	6.6	5.06	5.82		13.26	16.95	8.99	14.74	9.92	4.84			7.46			4	3	1	1	2	3	4	2		5	6	3	5	4
FALSE	High	Master Protein	A0A087ZXL3	Uncharacterized protein OS=Apis mellifera OX=7460 GN=LOC552424 PE=4 SV=1		0	FALSE	112.778	68	16	246	16	160	19.5	7.33	35.32	43.24	43.21	17.09	23.32	42.89	37.99	58.17	21.67	46.44	26.83	22.87	50.44	39.79	35.48	1.76	29.34	5.18	6.13	19.23	9	9	9	8	8	11	10	12	7	12	10	6	11	10
FALSE	High	Master Protein	A0A087ZXL8	Uncharacterized protein OS=Apis mellifera OX=7460 GN=LOC552361 PE=3 SV=1		0	FALSE	15.621	18	5	53	5	290	31.7	9.03	1.97	5.61	3.29		0	7.42	5.64	8.37		5.35	5.99	3.8	1.84	5.12	1.82	4.03		5.47	0		4	4	2		2	3	4	3		3	3	2	4	3
FALSE	High	Master Protein	A0A087ZXM2	Uncharacterized protein OS=Apis mellifera OX=7460 PE=4 SV=1		0	FALSE	29.424	30	7	14	7	259	30.6	7.3		2.92				7.33					3.5			0		8.57				4.55		1				3					3			1
FALSE	High	Master Protein	A0A087ZXT9	Uncharacterized protein OS=Apis mellifera OX=7460 GN=smid PE=4 SV=1		0	FALSE	6.331	1	1	4	1	939	104.2	5.73	2.61					2.38	0				2										1					1	1				1
FALSE	High	Master Protein	A0A087ZXU5	Uncharacterized protein OS=Apis mellifera OX=7460 GN=CYP9Q1 PE=3 SV=1	PREDICTED: Apis mellifera cytochrome P450 9e2 (LOC410492), mRNA	0	FALSE	116.1	55	21	131	21	510	58.8	8.72	17.81	22.78	9.71	2.07	5.97	14.51	43.22	54.3	6.76	13.05	18.67	5.21	33.45	21.5	21.66	5.53	28	19.73	2.09	5.08	6	6	4	1	4	4	10	11	4	5	4	1	7	6
FALSE	High	Master Protein	A0A087ZXU8	Uncharacterized protein OS=Apis mellifera OX=7460 PE=3 SV=1		0	FALSE	459.4	76	38	2055	38	531	61.3	7.96	318.11	315.58	194.43	172.82	197.71	339	330.83	385.01	107.93	213.86	406.38	234.13	329.57	289.58	222.14	359.15	171.79	608.82	299.29	147.59	33	31	29	28	28	34	33	34	25	31	33	28	31	32
FALSE	High	Master Protein	A0A087ZXV8	Uncharacterized protein OS=Apis mellifera OX=7460 GN=CYP9Q2 PE=3 SV=1	PREDICTED: Apis mellifera cytochrome P450 9e2 (LOC408452), mRNA	0	FALSE	135.689	54	22	252	22	532	60.9	8.38	24.64	44.58	21.5	12.97	20.42	38.26	62.69	56.49	11.33	21.7	78.52	44.84	33.24	56.3	24.71	6.55	16.08	7.34	13.29	5.54	7	11	8	7	9	10	11	13	6	7	12	9	10	12
FALSE	High	Master Protein	A0A087ZXV9	Uncharacterized protein OS=Apis mellifera OX=7460 GN=CYP9Q3 PE=3 SV=1	PREDICTED: Apis mellifera cytochrome P450 9e2 (LOC408453), mRNA	0	FALSE	212.753	60	26	438	26	517	58.9	8.41	82.67	29.43	25.81	27.34	49.19	98.15	106.36	113.84	12.75	32.33	125.45	95.43	97.58	52.77	86	37.45	38.93	43.8	26.61	8.98	15	7	8	7	16	17	19	20	6	8	20	17	17	11
FALSE	High	Master Protein	A0A087ZXX3	Uncharacterized protein OS=Apis mellifera OX=7460 PE=4 SV=1	PREDICTED: Apis mellifera thioredoxin-like protein 1 (LOC550734), mRNA	0	FALSE	62.473	48	10	53	10	300	33	5.2	12.53	3.3	4.6			23.56		2.54	0		30.57	5.2	7.53	19.47	5.11	14.19	0	15.27	5.94	6.09	4	1	1			8		1	1		7	2	2	5
FALSE	High	Master Protein	A0A087ZY44	Uncharacterized protein OS=Apis mellifera OX=7460 GN=724708 PE=4 SV=1		0.001	FALSE	4.962	12	2	11	2	144	17.4	9.38	3.86	1.91	0			2	1.98	1.96		0			0	1.63	0						2	1	1			1	1	1		1			1	1
FALSE	High	Master Protein	A0A087ZY47	Uncharacterized protein OS=Apis mellifera OX=7460 GN=LOC411732 PE=4 SV=1	PREDICTED: Apis mellifera trimeric intracellular cation channel type 1B.1 (LOC411732), mRNA	0	FALSE	16.852	16	3	24	3	275	30.7	8.87	2.92	1.83	3.1	0	1.72	1.66	1.78	1.7		3.29			2.75		0			1.67	0		1	1	2	1	1	1	1	2		1			1
FALSE	High	Master Protein	A0A087ZY59	Uncharacterized protein OS=Apis mellifera OX=7460 GN=LOC552495 PE=4 SV=1		0	FALSE	13.171	6	3	11	3	664	76.9	9.47		2.93	2.76			3.16	5.88	2.88			2.65		2.08				1.86					1	1			1	2	2			2		1
FALSE	High	Master Protein	A0A087ZY62	Uncharacterized protein OS=Apis mellifera OX=7460 PE=4 SV=1		0.002	FALSE	4.091	3	1	1	1	492	55.9	5.29						2.33																				1
FALSE	High	Master Protein	A0A087ZY69	Uncharacterized protein OS=Apis mellifera OX=7460 GN=725679 PE=4 SV=1	PREDICTED: Apis mellifera sex-lethal homolog (LOC725679), transcript variant X6, mRNA	0	FALSE	31.373	30	6	11	6	283	32	5.57	3.15					6.3					9.91					5.73	3.64	3.25	2.34		1					2					3
FALSE	High	Master Protein	A0A087ZY95	Uncharacterized protein OS=Apis mellifera OX=7460 PE=4 SV=1	PREDICTED: Apis mellifera basement membrane-specific heparan sulfate proteoglycan core protein (LOC409722), transcript variant X13, mRNA	0	FALSE	187.963	36	13	555	13	457	51.3	4.44	99.06	72.81	47.6	111.66	89.01	70.37	62.52	88.19	98.83	99.7	73.33	49.61	86.51	89.61	75.64	119.63	88.71	76.06	101.51	17.19	10	10	10	12	12	10	9	11	13	11	12	7	10	12
FALSE	High	Master Protein	A0A087ZY96	Uncharacterized protein OS=Apis mellifera OX=7460 PE=4 SV=1		0	FALSE	2201.68	53	163	9175	163	4006	445.7	5.43	1425.98	1175.97	1039.54	1449.14	1321.48	1248.02	974.65	1514.28	1249.06	1502.69	1188.49	977.55	1285.74	1270.05	1071.8	1125.79	777.73	1542.86	1627.53	1322.59	121	111	115	135	130	122	116	127	125	127	121	117	121	124
FALSE	High	Master Protein	A0A087ZYB5	Uncharacterized protein OS=Apis mellifera OX=7460 PE=4 SV=1		0	FALSE	7.636	9	1	1	1	358	39.2	6.61																				4.04
FALSE	High	Master Protein	A0A087ZYC0	Uncharacterized protein OS=Apis mellifera OX=7460 GN=LOC727408 PE=4 SV=1		0	FALSE	114.112	34	26	171	26	951	110.3	6.47	21.74	15.64	31.5	46.85	30.63	33.54	27.49	44.85	23.06	33.52	14.43	9.74	38.27	28.54	23.61	11.73		5.07	9.81	6.33	6	4	9	13	8	8	8	15	10	11	4	3	10	7
FALSE	High	Master Protein	A0A087ZYD2	Uncharacterized protein OS=Apis mellifera OX=7460 PE=4 SV=1		0	FALSE	22.063	22	2	12	2	162	17.8	7.81	4.98					4.47	2.42			1.63	6.52	5.6	4.84			3.19	3.33				1					1	1			1	2	2	2
FALSE	High	Master Protein	A0A087ZYF6	Uncharacterized protein OS=Apis mellifera OX=7460 GN=LOC413054 PE=4 SV=1		0	FALSE	184.086	32	28	267	28	1314	146.4	6.7	23.53	15.36	13.15	85.67	97.69	14.24	24.91	27.4	6.84	56.17	37.45	26.55	57.9	45.17	36.67	11.63	24.6	30.11	17.23	24.57	4	3	5	20	18	5	12	7	2	12	9	6	14	9
FALSE	High	Master Protein	A0A087ZYG3	Uncharacterized protein OS=Apis mellifera OX=7460 GN=LOC411889 PE=4 SV=1	PREDICTED: Apis mellifera putative serine protease K12H4.7 (LOC411889), transcript variant X2, mRNA	0	FALSE	33.602	20	6	43	6	494	56.4	8.03	9.34	6.17	0		0	9.67	6.58	2.21			11.62	7.34	5.33	4.99	2.33	2.39	5.98	2.05		4.34	3	1	2		1	3	2	1			4	5	1	3
FALSE	High	Master Protein	A0A087ZYM0	Uncharacterized protein OS=Apis mellifera OX=7460 PE=4 SV=1		0	FALSE	11.587	9	2	5	2	327	36.1	6.54	3.58							1.92					1.71					1.8	0		1							1					1
FALSE	High	Master Protein	A0A087ZYN5	Uncharacterized protein OS=Apis mellifera OX=7460 GN=LOC408920 PE=4 SV=1	PREDICTED: Apis mellifera long-chain fatty acid transport protein 4 (LOC408920), mRNA	0	FALSE	88.794	44	18	112	18	626	70.1	8.38	15.03	24.1	10.86		3.3	32.85	41.34	31.95		9.25	33.17	28.49	28.41	15.22	7.61	5.02	14.86	21.12	11.23	1.89	4	7	5		1	7	11	10		3	9	9	8	4
FALSE	High	Master Protein	A0A087ZYN6	Uncharacterized protein OS=Apis mellifera OX=7460 GN=LOC725665 PE=4 SV=1		0.001	FALSE	4.907	1	1	1	1	1287	139.6	6.6																		2.97
FALSE	High	Master Protein	A0A087ZYP6	Uncharacterized protein OS=Apis mellifera OX=7460 GN=RpL36A PE=3 SV=1		0	FALSE	17.318	23	5	28	5	104	12.5	10.78	5.51	2.54		1.69		4.7	7.74	9.08	2.08	2.22	4.29	2.77	1.85	2.29	1.63	2.29	5.66	2.41			2	2		1		2	3	3	1	1	3	1	1	1
FALSE	High	Master Protein	A0A087ZYV1	Uncharacterized protein OS=Apis mellifera OX=7460 PE=4 SV=1	PREDICTED: Apis mellifera short stop (LOC408779), transcript variant X1, mRNA	0	FALSE	896.302	30	142	888	142	6888	768.5	5.34	207.42	134.9	96.71	47.56	63.95	216.24	129.21	75.16	94.46	99.92	193.58	92.01	150.08	160.16	46.56	118.4	209.41	159.46	78.93	81.29	52	34	38	26	21	58	30	19	37	32	46	24	42	45
FALSE	High	Master Protein	A0A087ZYV9	Uncharacterized protein OS=Apis mellifera OX=7460 GN=LOC726855 PE=4 SV=1		0	FALSE	11.371	5	2	5	2	366	36.5	5.64															5.04				0
FALSE	High	Master Protein	A0A087ZZ11	Uncharacterized protein OS=Apis mellifera OX=7460 GN=LOC552809 PE=4 SV=1	PREDICTED: Apis mellifera cytochrome c oxidase subunit NDUFA4 (LOC552809), mRNA	0	FALSE	36.992	28	4	127	4	85	9.7	9.58	20.24	20.98	14.44	13.27	6.86	23.68	21.85	21.71	13.44	14.22	18.94	12.48	18.61	17.9	14.43	19.27	14.76	22.21	16.44	6.02	4	4	2	2	1	3	3	3	3	2	4	2	4	3
FALSE	High	Master Protein	A0A087ZZ12	Uncharacterized protein OS=Apis mellifera OX=7460 GN=Ppcs PE=4 SV=1		0	FALSE	11.172	14	3	3	3	314	35.9	7.49						2.5					2.9															1					2
FALSE	High	Master Protein	A0A087ZZ13	Uncharacterized protein OS=Apis mellifera OX=7460 PE=4 SV=1		0	FALSE	7.004	2	1	4	1	1382	154.5	6.42	0										2.12	3.02		3.01							1										1	1		1
FALSE	High	Master Protein	A0A087ZZ18	Uncharacterized protein OS=Apis mellifera OX=7460 GN=725102 PE=4 SV=1		0	FALSE	12.293	32	2	6	2	112	12.1	5.45	2.21	3.91						2.86			5.03		3.08				3				1	1						1			1		1
FALSE	High	Master Protein	A0A087ZZ23	Uncharacterized protein OS=Apis mellifera OX=7460 GN=mRpL4 PE=4 SV=1		0	FALSE	12.073	11	2	3	2	280	32.7	9.57							2.31				3.47				3.16												1				1
FALSE	High	Master Protein	A0A087ZZ43	Uncharacterized protein OS=Apis mellifera OX=7460 GN=LOC411011 PE=4 SV=1		0	FALSE	18.636	15	4	27	3	381	44.2	7.88	2.04	5.66					2.8			2.86	2.91	4.89	7.91	5.52	7.3	2.68	3.03	5.44	4.96	2.52	2	2					1			1	1	1	2	2
FALSE	High	Master Protein	A0A087ZZ55	Uncharacterized protein OS=Apis mellifera OX=7460 PE=4 SV=1	PREDICTED: Apis mellifera nidogen-2 (LOC408797), mRNA	0	FALSE	561.239	59	51	1342	51	1309	143.5	4.91	195.82	231.79	135.63	179.4	245.78	191.96	230.04	265.01	125.25	266.39	182.23	211.02	207.42	151.96	162.99	123.5	151.22	126.9	71.86	170.75	35	34	33	39	40	34	32	36	29	40	32	34	35	32
FALSE	High	Master Protein	A0A087ZZ59	Uncharacterized protein OS=Apis mellifera OX=7460 PE=4 SV=1		0	FALSE	22.817	63	3	35	3	72	7.8	4.65	3.94	8.87	1.75			8.95	8.26	8.96	12.4	7.06	2.09	3.81	3.45		0	3.26	6.35	3.74	3.33	10.14	1	2	1			2	2	2	2	2	1	1	1
FALSE	High	Master Protein	A0A087ZZ67	Uncharacterized protein OS=Apis mellifera OX=7460 GN=LOC725169 PE=4 SV=1		0	FALSE	228.472	35	33	260	33	1224	140	6.49	90.19	17.43	14.12	6.22	13.82	60.1	53.03	67.32	2	29.81	78.6	33.85	40.53	49.83	20.65	36.02	46.38	55.88	28.23	21.64	22	6	6	3	5	16	14	18	1	10	19	9	12	15
FALSE	High	Master Protein	A0A087ZZ70	Uncharacterized protein OS=Apis mellifera OX=7460 PE=4 SV=1	PREDICTED: Apis mellifera filamin-like (LOC409697), transcript variant X1, mRNA	0	FALSE	337.93	38	53	319	42	2083	226.6	5.8	90.65	40.94	2.5	11.16	10.71	131.78	39.64	14.88	27.47	41.89	146.55	39.31	6.24	50.31	16.37	59.42	57.92	33.58	31.44	24.65	21	10	2	5	5	30	12	6	12	15	37	11	2	15
FALSE	High	Master Protein	A0A087ZZ77	Uncharacterized protein OS=Apis mellifera OX=7460 PE=4 SV=1		0.002	FALSE	4.024	2	1	3	1	718	84.3	8.44		2.14						0		0												1						1		1
FALSE	High	Master Protein	A0A087ZZ78	Uncharacterized protein OS=Apis mellifera OX=7460 GN=724481 PE=4 SV=1	PREDICTED: Apis cerana beclin-1-like protein A (LOC107996109), transcript variant X4, mRNA	0	FALSE	73.888	23	13	105	13	744	86.2	7.25	33.31	5.42	8.18	6.94	10.95	29.19	29.13	5.02	11.99	9.12	35.37	7.43	26.24	29.97	6.89	17.01	13.05	17.99	15.73		8	1	3	3	4	7	7	1	6	3	9	2	8	6
FALSE	High	Master Protein	A0A087ZZ92	Uncharacterized protein OS=Apis mellifera OX=7460 GN=R PE=4 SV=1		0	FALSE	80.252	58	10	140	10	184	20.9	6.71	40.42	26.54	17.92	7.28	14.69	31.51	18.46	24.85	2.11	25.84	36	29.21	39.7	27.73	16.16	22.06	15.38	13.36	22.89	7.16	6	5	4	3	3	5	5	5	2	5	6	7	6	6
FALSE	High	Master Protein	A0A087ZZB0	Uncharacterized protein OS=Apis mellifera OX=7460 PE=4 SV=1	PREDICTED: Apis mellifera spectrin beta chain, non-erythrocytic 5 (LOC413332), transcript variant X1, mRNA	0	FALSE	45.335	3	10	38	10	4124	477.8	6.19		2.09				10.48	9	4.86	0		8.36	2.99	2.16	2.17	4.22	0	4.09	9.27	2.35			1				3	3	2	1		4	2	2	2
FALSE	High	Master Protein	A0A087ZZE0	Uncharacterized protein OS=Apis mellifera OX=7460 GN=LOC552000 PE=4 SV=1		0	FALSE	8.516	8	2	5	2	280	31.8	9.11																0		3.42	5.12	3.56
FALSE	High	Master Protein	A0A087ZZE1	Uncharacterized protein OS=Apis mellifera OX=7460 GN=LOC726833 PE=4 SV=1	PREDICTED: Apis mellifera TOM1-like protein 2 (LOC726833), transcript variant X2, mRNA	0	FALSE	6.898	2	1	8	1	525	58.4	4.97		3.17			2.3		3.41	3.05			6.04		2.58		0							1			1		1	1			1		1
FALSE	High	Master Protein	A0A087ZZF3	Uncharacterized protein OS=Apis mellifera OX=7460 GN=Arp1 PE=3 SV=1		0	FALSE	590.016	77	32	7050	5	376	41.8	5.48	910.68	785.01	874.56	395.1	426.36	1035.22	695.39	927.06	540.05	705.88	825.86	610.84	806.95	796.69	591.66	2238.54	497.95	2444.92	1409.96	1730.02	22	19	25	21	25	24	21	21	24	21	21	18	21	24
FALSE	High	Master Protein	A0A087ZZK9	Uncharacterized protein OS=Apis mellifera OX=7460 PE=4 SV=1	A0A087ZZK9	0	FALSE	8.099	5	1	11	1	584	65.9	8.53	3.49					3.5	5.62	2.67		0	2.42	2.22	3.24	0							1					1	1	1		1	1	1	1	1
FALSE	High	Master Protein	A0A087ZZP4	Uncharacterized protein OS=Apis mellifera OX=7460 GN=LOC412442 PE=3 SV=1		0	FALSE	21.419	18	5	28	4	325	36.7	9.14	2.16	2.74	4.68			9.59	10.74	5.34		4.32	2.84		4.79	4.96	2.37	4.34		4.65		2	2	1	2			4	3	2		2	1		2	1
FALSE	High	Master Protein	A0A087ZZR1	Uncharacterized protein OS=Apis mellifera OX=7460 GN=LOC412543 PE=4 SV=1	Apis mellifera ligustica farnesoic acid O-methyltransferase (FAMet) mRNA, complete cds	0	FALSE	303.073	72	23	693	23	447	49	5.34	137.86	162.99	133	90.37	115.14	148.3	180.3	166.06	56.26	150.79	138.18	148.1	150.75	108.13	137.07	108.34	94.88	99.54	48.49	86.44	17	15	18	13	14	15	17	16	11	16	14	13	16	14
FALSE	High	Master Protein	A0A087ZZS7	Uncharacterized protein OS=Apis mellifera OX=7460 GN=LOC409866 PE=4 SV=1	PREDICTED: Apis mellifera T-complex protein 1 subunit beta (LOC409809), mRNA	0	FALSE	32.291	15	4	18	3	403	46.2	6.24	6.12					10.92	3.03		4.07		10.23	0		4.02		7.06	3.47	3.14	0	1.76	2					1	1		1		2	1		1
FALSE	High	Master Protein	A0A087ZZT7	Uncharacterized protein OS=Apis mellifera OX=7460 GN=mRpS5 PE=4 SV=1		0.01	FALSE	2.816	2	1	4	1	437	49.7	10.13				0	1.76			2.2					2.07											1	1			1					1
FALSE	High	Master Protein	A0A087ZZU4	Uncharacterized protein OS=Apis mellifera OX=7460 GN=LOC411100 PE=4 SV=1		0.002	FALSE	3.977	3	1	3	1	547	59.9	6.87						2.32					1.77															1					1
FALSE	High	Master Protein	A0A087ZZU9	Uncharacterized protein OS=Apis mellifera OX=7460 GN=Cox5a PE=4 SV=1	PREDICTED: Apis mellifera cytochrome c oxidase subunit 5A, mitochondrial (LOC408837), mRNA	0	FALSE	87.236	63	8	264	8	152	17.6	5.92	29.56	51.42	35.79	19.9	25.91	37.51	44.61	48.11	39.56	31.34	44.52	44.62	63.87	47.38	39.19	119.31	42.21	28.93	18.06	12.64	3	7	6	3	3	3	6	6	4	4	4	5	6	6
FALSE	High	Master Protein	A0A087ZZW6	Uncharacterized protein OS=Apis mellifera OX=7460 PE=4 SV=1	PREDICTED: Apis mellifera solute carrier family 12 member 4 (LOC411113), transcript variant X2, mRNA	0	FALSE	12.574	3	2	5	2	1109	122	6.52						6.11		3.33			2.31															2		1			1
FALSE	High	Master Protein	A0A087ZZY3	Uncharacterized protein OS=Apis mellifera OX=7460 PE=4 SV=1	PREDICTED: Apis mellifera protein anoxia up-regulated-like (LOC113218812), transcript variant X2, mRNA	0	FALSE	105.424	73	12	324	12	206	23.6	9.66	73.18	49.09	43.08	33	34.49	68.73	54.82	75.56	55.41	50.25	46.88	49.88	49.51	42.02	24.41	28.53	30.71	44.82	17.77	37.97	11	6	9	8	7	10	9	11	12	9	9	7	8	7
FALSE	High	Master Protein	A0A087ZZY4	Uncharacterized protein OS=Apis mellifera OX=7460 PE=4 SV=1	PREDICTED: Apis mellifera protein anoxia up-regulated-like (LOC113218812), transcript variant X1, mRNA	0	FALSE	167.441	68	17	463	17	235	27.4	8.79	116.14	54.9	112.67	57.39	47.08	94.45	72.79	118.81	55.49	79.42	64.64	47.07	88.02	77.58	64.95	58.76	54.4	60.2	53.71	30.49	14	11	14	12	11	16	14	16	13	13	12	9	14	13
FALSE	High	Master Protein	A0A087ZZY5	Uncharacterized protein OS=Apis mellifera OX=7460 PE=4 SV=1		0	FALSE	229.02	43	22	365	22	475	54.7	4.25	96.42	45.89	36.15	25.42	31.27	74.14	53.07	44.63	46.75	44.51	75.79	61.54	76.75	53.47	27.45	88.46	95.68	82.91	38.49	43.4	13	8	9	8	9	12	12	9	10	9	13	11	12	12
FALSE	High	Master Protein	A0A087ZZZ6	Uncharacterized protein OS=Apis mellifera OX=7460 GN=552679 PE=3 SV=1		0	FALSE	8.162	5	3	13	3	501	57.7	8.31	0	2.26				0	3.9	0				2.81		2.73	2.03		3.65				1	1				1	1	1				1		1
FALSE	High	Master Protein	A0A087ZZZ7	Uncharacterized protein OS=Apis mellifera OX=7460 PE=4 SV=1	PREDICTED: Apis mellifera UDP-xylose and UDP-N-acetylglucosamine transporter (LOC725569), mRNA	0	FALSE	9.713	6	3	13	3	328	37.2	8.66	0	2.5	0					2.48					2.63		2.06	2.14		0	2.49	0	1	1	1					2					1
FALSE	High	Master Protein	A0A088A008	Uncharacterized protein OS=Apis mellifera OX=7460 PE=4 SV=1	PREDICTED: Apis mellifera leupaxin (LOC551919), transcript variant X10, mRNA	0	FALSE	85.991	35	12	150	12	520	57.6	5.57	6.99	42.05	2.31	1.9	2.36	26.59	45.83	29	12.99	12.93	46.29	37.41	25.79	18.07	7.45	2.12	34.47	4.64	1.73	12.03	4	9	1	1	2	8	7	8	6	4	9	9	7	5
FALSE	High	Master Protein	A0A088A015	Uncharacterized protein OS=Apis mellifera OX=7460 GN=LOC408851 PE=3 SV=1	PREDICTED: Apis mellifera putative cysteine proteinase CG12163 (LOC408851), transcript variant X1, mRNA	0	FALSE	41.835	8	7	28	7	881	100.3	6.1	6.34		8.2	2.74	1.94	6.05		7.65	0	0	6.46		2.69		8.06	2.69		3.55	5.84	3.5	2		2	2	2	2		3	1	1	2		1
FALSE	High	Master Protein	A0A088A019	Uncharacterized protein OS=Apis mellifera OX=7460 GN=Myo1A PE=3 SV=1	PREDICTED: Apis mellifera myosin-IA (LOC552299), transcript variant X2, mRNA	0	FALSE	34.632	9	7	26	7	1017	118	9.14	2.43	4.55	2.21		0	2.67	3.99	2.01		1.7	2.54		1.93	1.85	8.15	4.94		6.5		9.44	1	1	1		1	1	2	2		1	1		2	1
FALSE	High	Master Protein	A0A088A023	Uncharacterized protein OS=Apis mellifera OX=7460 GN=LOC412232 PE=4 SV=1		0	FALSE	56.607	22	11	20	11	790	90.1	6.92						15.8					20.21			2.97		11.91	3.38									4					8			1
FALSE	High	Master Protein	A0A088A042	Uncharacterized protein OS=Apis mellifera OX=7460 GN=725148 PE=4 SV=1	PREDICTED: Apis mellifera uncharacterized LOC725148 (LOC725148), transcript variant X2, mRNA	0	FALSE	94.039	59	11	160	11	301	33.9	7.97	36.96	19.1	23.75	13.11	20.47	38.59	26.32	28.01	33.55	23.42	23.84	3.92	28.74	28.72	10.38	28.28	40.94	7.96		2.56	7	4	7	5	6	9	5	7	8	6	5	1	7	6
FALSE	High	Master Protein	A0A088A049	Uncharacterized protein OS=Apis mellifera OX=7460 PE=4 SV=1	PREDICTED: Apis mellifera neurochondrin homolog (LOC102654127), mRNA	0	FALSE	160.081	31	23	200	23	986	111.9	6.1	52.69	27.48		34.78	14.49	77.71	18.12		7.35	2.75	57.95	13.03	22.19	28.85	8.87	7.4	10.39	4.3	27.9	24.56	12	10		13	6	16	6		5	2	16	5	10	12
FALSE	High	Master Protein	A0A088A059	Uncharacterized protein OS=Apis mellifera OX=7460 GN=Rox8 PE=4 SV=1		0	FALSE	12.068	9	2	3	2	392	43.3	8.13						6.93												2.15								2
FALSE	High	Master Protein	A0A088A060	Uncharacterized protein OS=Apis mellifera OX=7460 PE=4 SV=1	PREDICTED: Apis mellifera pre-mRNA-processing factor 39 (LOC408850), mRNA	0	FALSE	48.235	9	6	53	6	1061	121.6	4.88	16.98	16.03	0	0	2.69	15.99	8.3	6.98	2.04	6.59	14.01	3.25	3.19	6.22			24		2.99		3	4	1	1	4	3	3	3	1	2	4	1	2	2
FALSE	High	Master Protein	A0A088A061	Uncharacterized protein OS=Apis mellifera OX=7460 PE=4 SV=1		0	FALSE	13.674	22	3	4	3	105	11.6	4.79																	2.18	5.62		2.41
FALSE	High	Master Protein	A0A088A065	Uncharacterized protein OS=Apis mellifera OX=7460 GN=100577702 PE=3 SV=1		0	FALSE	6.757	12	1	11	1	196	21.9	9.95					2.55	5.25	4.38	3.24		0	2.84	4.16		0											1	1	1	1		1	1	1		1
FALSE	High	Master Protein	A0A088A086	Uncharacterized protein OS=Apis mellifera OX=7460 GN=LOC725797 PE=4 SV=1	PREDICTED: Apis mellifera NADH dehydrogenase [ubiquinone] 1 beta subcomplex subunit 3 (LOC725797), mRNA	0	FALSE	43.364	45	3	88	3	104	11.8	7.81	11.35	12.77	16.02	8.52	6.86	21	16.49	17.05	6.64	24.75	14.12	18.38	15.4	12.25	10.92	12.74	11.64	11.55	8.57		3	2	3	2	2	3	3	3	2	3	3	3	3	3
FALSE	High	Master Protein	A0A088A093	Uncharacterized protein OS=Apis mellifera OX=7460 PE=4 SV=1	PREDICTED: Apis mellifera extended synaptotagmin-like protein 2 (LOC413001), transcript variant X1, mRNA	0	FALSE	92.478	30	19	88	19	847	95.5	6.01	14.75	17.33	17.59		3.19	15.54	20.57	23.24	0	9.03	20.04	13.36	18.97	14.23	10.68	4.44	4.06	8.36	0	3.98	5	4	6		2	5	8	7	1	4	8	6	5	5
FALSE	High	Master Protein	A0A088A0C7	Uncharacterized protein OS=Apis mellifera OX=7460 GN=IGFn3-7 PE=4 SV=1	PREDICTED: Apis mellifera neuroglian (LOC411829), transcript variant X2, mRNA	0	FALSE	311.891	42	38	457	38	1251	139.7	5.57	126.29	106.89	61.74	20.33	35.85	93.23	114.98	139.55	9.09	53.99	115.15	67.25	80.09	75.18	52.39	52.24	74.02	85.25	48.33	48.49	23	20	16	9	11	20	21	25	5	12	21	17	22	18
FALSE	High	Master Protein	A0A088A0F7	Uncharacterized protein OS=Apis mellifera OX=7460 GN=LOC552659 PE=4 SV=1	PREDICTED: Apis mellifera optic atrophy 3 protein homolog (LOC552659), mRNA	0	FALSE	8.342	15	3	13	3	212	24.4	9.45		2.24	4.68				2.14	0		2.12	0		2.14	0	1.63							2	2				1	1		1	1		2	1
FALSE	High	Master Protein	A0A088A0F9	Uncharacterized protein OS=Apis mellifera OX=7460 GN=LOC726118 PE=4 SV=1		0	FALSE	36.202	68	7	180	7	78	9.5	9.6	17.71	25.04	19.21	11.39	12.42	19.9	15.37	27.17	0	19.73	28.3	22.13	25.32	19.06	18.21	9.16		13.41	5.9	8.97	3	3	4	4	5	4	4	4	2	4	4	4	4	4
FALSE	High	Master Protein	A0A088A0G9	Uncharacterized protein OS=Apis mellifera OX=7460 GN=LOC413762 PE=4 SV=1	PREDICTED: Apis mellifera complement component 1 Q subcomponent-binding protein, mitochondrial (LOC413762), mRNA	0	FALSE	87.294	51	11	160	11	267	29.9	4.98	45.31	24.05	26.2		2.22	51.4	17.02	17.8	14.56		44.44	15.97	2.77	32.81	21.05	18.95	91.29	12.11	9.31	25.37	6	5	6		1	6	4	5	6		6	4	1	6
FALSE	High	Master Protein	A0A088A0H5	Uncharacterized protein OS=Apis mellifera OX=7460 GN=LOC725733 PE=4 SV=1		0.002	FALSE	3.811	20	1	1	1	117	13.7	4.77																	2.67
FALSE	High	Master Protein	A0A088A0H7	Uncharacterized protein OS=Apis mellifera OX=7460 PE=4 SV=1		0	FALSE	8.63	3	1	3	1	607	71.1	9.35	3.3	2.94												2.05							1	1												1
FALSE	High	Master Protein	A0A088A0K0	Uncharacterized protein OS=Apis mellifera OX=7460 PE=4 SV=1	PREDICTED: Apis mellifera basigin (LOC726060), mRNA	0	FALSE	69.947	20	6	132	6	389	43.9	6.98	12.68	14.77	29.69	5.47	8.57	24.39	14.5	21.98	2.65	12.17	16.58	14.11	19.32	20.91	12.75	16.49	27.03	13.33		21.7	4	3	5	3	2	5	5	6	2	3	5	6	5	5
FALSE	High	Master Protein	A0A088A0L9	Uncharacterized protein OS=Apis mellifera OX=7460 GN=RpL9 PE=4 SV=1	PREDICTED: Apis mellifera 60S ribosomal protein L9 (LOC551107), mRNA	0	FALSE	79.521	54	9	160	9	190	21.5	9.86	22.59	19.79	13.81	8.86	12.33	28.37	29.93	33.34	5.03	17.85	32	24.15	17.05	20.26	21.83	13.82	3.71	29.84	16.26	20.63	5	5	4	4	4	6	8	7	2	6	8	7	6	6
FALSE	High	Master Protein	A0A088A0M9	Uncharacterized protein OS=Apis mellifera OX=7460 PE=4 SV=1	PREDICTED: Apis mellifera nuclear pore complex protein Nup155 (LOC412721), transcript variant X1, mRNA	0	FALSE	19.259	5	5	12	5	1293	145.3	6.43	2.1	2.64									2.59		2.54	2.25		4.72		1.95	4.53	0	1	1									1		1	1
FALSE	High	Master Protein	A0A088A0N4	Uncharacterized protein OS=Apis mellifera OX=7460 GN=Mtch PE=3 SV=1	PREDICTED: Apis mellifera mitochondrial carrier homolog 2 (LOC726264), transcript variant X2, mRNA	0	FALSE	9.202	12	3	4	3	313	35.6	8.9		2.05								0			2.28					2.75				1								1			1
FALSE	High	Master Protein	A0A088A0P6	Uncharacterized protein OS=Apis mellifera OX=7460 GN=LOC551636 PE=4 SV=1		0.001	FALSE	4.795	3	1	2	1	404	46.4	7.84		3.27									3.8											1									1
FALSE	High	Master Protein	A0A088A0P7	Uncharacterized protein OS=Apis mellifera OX=7460 GN=LOC725882 PE=4 SV=1		0	FALSE	69.963	70	5	207	5	97	10.9	4.72	35.93	40.34	58.29	47.56	32.39	18.77	12.8	23.41	20.42	34.22	43.05	27.49	46.37	36.27	31.93	20.39	17.26	28.42	27.54	19.9	4	4	3	4	5	2	1	3	3	4	3	3	3	3
FALSE	High	Master Protein	A0A088A0R5	Uncharacterized protein OS=Apis mellifera OX=7460 PE=4 SV=1		0	FALSE	94.396	21	19	138	19	1195	133.6	6.19	19.97	13.97	7.81	2.13	9.17	15.95	27.58	21.21	0	16.98	28.82	10.43	18.82	12.68	11.04	9.25	19.78	24.81	9.99	2.9	8	3	2	1	4	8	9	8	1	6	10	3	5	5
FALSE	High	Master Protein	A0A088A0S0	Uncharacterized protein OS=Apis mellifera OX=7460 GN=GstO1 PE=3 SV=1	PREDICTED: Apis mellifera pyrimidodiazepine synthase (LOC552118), transcript variant X1, mRNA	0	FALSE	9.114	11	2	5	2	241	28	6.95	2.92					3.41					3.3					2.37		0			1					1					1
FALSE	High	Master Protein	A0A088A0S1	Uncharacterized protein OS=Apis mellifera OX=7460 GN=100578631 PE=4 SV=1		0.001	FALSE	5.798	4	2	3	2	878	98.6	9.44													0	0			0																1	1
FALSE	High	Master Protein	A0A088A0V7	Uncharacterized protein OS=Apis mellifera OX=7460 GN=tmod PE=4 SV=1		0	FALSE	97.145	41	13	109	13	444	49.7	4.96	18.39	28.01	18.11	13.59	15.36	14.69	28.81	9.1	12.31	24.17	25.07	17.85	23.25	18.14	12.48	7.59	29.39	3.25	5.55	2.1	5	6	4	4	5	4	7	3	6	6	6	4	6	4
FALSE	High	Master Protein	A0A088A0Y4	Uncharacterized protein OS=Apis mellifera OX=7460 GN=Snap PE=4 SV=1	PREDICTED: Apis mellifera alpha-soluble NSF attachment protein (LOC552830), mRNA	0	FALSE	62.329	48	11	33	11	292	33.3	5.55		11.66	2.78			8.62	9.75	9.39	0		7.22	3.08		6.78		7.33	17.88	6.57	2.61	10.12		4	1			3	3	3	1		2	1		2
FALSE	High	Master Protein	A0A088A0Z6	Uncharacterized protein OS=Apis mellifera OX=7460 GN=LOC552843 PE=4 SV=1		0	FALSE	34.185	11	5	7	5	824	93.7	6.27														2.36	13.78																			1
FALSE	High	Master Protein	A0A088A100	Uncharacterized protein OS=Apis mellifera OX=7460 GN=LOC551146 PE=4 SV=1		0	FALSE	6.801	6	1	1	1	389	38.2	10.68																	3.44
FALSE	High	Master Protein	A0A088A108	Uncharacterized protein OS=Apis mellifera OX=7460 GN=LOC411863 PE=4 SV=1	PREDICTED: Apis mellifera dehydrogenase/reductase SDR family member 7 (LOC411863), mRNA	0	FALSE	33.386	23	6	53	6	329	37.1	8.62	0	10.52		2.07	5.08	6.61	16.49	9.09		5.03	7.92	5.23	10.33	8.33	5.43	5.21		12	2.46	7.03	1	3		1	3	1	4	3		2	3	1	2	2
FALSE	High	Master Protein	A0A088A117	Uncharacterized protein OS=Apis mellifera OX=7460 GN=LOC551313 PE=4 SV=1		0.001	FALSE	5.596	18	1	1	1	162	18.5	4.79						3.4																				1
FALSE	High	Master Protein	A0A088A120	Uncharacterized protein OS=Apis mellifera OX=7460 GN=Mlf PE=4 SV=1		0.002	FALSE	4.34	4	1	2	1	258	29.7	7.08																2.1				0
FALSE	High	Master Protein	A0A088A173	Uncharacterized protein OS=Apis mellifera OX=7460 PE=4 SV=1	PREDICTED: Apis mellifera selenide, water dikinase (LOC410258), mRNA	0	FALSE	13.23	27	1	2	1	55	5.9	5.17						5.45			3.39																	1			1
FALSE	High	Master Protein	A0A088A174	Uncharacterized protein OS=Apis mellifera OX=7460 PE=4 SV=1	PREDICTED: Apis mellifera selenide, water dikinase (LOC410258), mRNA	0	FALSE	62.51	42	9	56	9	324	35.4	7.17	19.75	3.57	8.2	3.24	8.94	30.7	8.65	5.9	5.02		14		3.09	18.39	9.55	5.63	10.27	5.99	13.65	1.94	3	1	3	1	3	6	3	2	2		3		1	3
FALSE	High	Master Protein	A0A088A179	Uncharacterized protein OS=Apis mellifera OX=7460 PE=4 SV=1		0	FALSE	13.074	5	3	6	3	957	105.1	7.12		3.62					3.39				6.23				0	0						1					1				2
FALSE	High	Master Protein	A0A088A196	Uncharacterized protein OS=Apis mellifera OX=7460 GN=LOC552303 PE=4 SV=1	PREDICTED: Apis mellifera RNA-binding protein cabeza (LOC552303), transcript variant X1, mRNA	0	FALSE	19.15	6	2	23	2	415	42.8	9.63	5.96	7.22	2.77	3.6	3.18	6.06	6.04	5.61	3.19	2.31	2.17		4.35	2.23		2.91	3.32	6.31			1	1	1	1	1	2	2	2	1	1	1		2	1
FALSE	High	Master Protein	A0A088A1A4	Uncharacterized protein OS=Apis mellifera OX=7460 PE=4 SV=1		0	FALSE	33.072	8	5	17	5	910	102.7	9.58		2.75				2.92	2.83	2.8	0	1.79	4.62			2.22		4.63	3.39	3.34				1				2	1	1	1	1	1			1
FALSE	High	Master Protein	A0A088A1F9	Uncharacterized protein OS=Apis mellifera OX=7460 PE=4 SV=1		0.002	FALSE	4.409	12	1	1	1	125	13.8	7.42																			2.64
FALSE	High	Master Protein	A0A088A1H4	Uncharacterized protein OS=Apis mellifera OX=7460 PE=4 SV=1	PREDICTED: Apis mellifera fibrillin-2 (LOC100577456), transcript variant X2, mRNA	0	FALSE	791.025	40	82	1440	82	2870	314.4	4.97	168.24	113.78	86.95	310.52	292.06	113.3	92.65	222.31	214.76	314.8	134.77	174.76	180.04	134.76	135.24	118.41	61.93	126.15	143.23	118.73	42	29	31	63	62	37	34	53	53	62	42	42	48	37
FALSE	High	Master Protein	A0A088A1K6	Uncharacterized protein OS=Apis mellifera OX=7460 GN=107963960 PE=4 SV=1		0.002	FALSE	4.32	3	1	2	1	312	35.1	8.72						2.39			0																	1			1
FALSE	High	Master Protein	A0A088A1L3	Uncharacterized protein OS=Apis mellifera OX=7460 GN=LOC408349 PE=3 SV=1		0	FALSE	43.828	25	9	66	9	432	49.2	9.26	15.88	20.36	7.75		4.85	11.09	12.38	14.07		12.63	5.57	3.15	11.17	2.74	12.2	4.11		2.31	0		6	5	3		2	4	5	5		4	4	1	4	2
FALSE	High	Master Protein	A0A088A1M5	Uncharacterized protein OS=Apis mellifera OX=7460 GN=LOC410325 PE=3 SV=1	PREDICTED: Apis mellifera trifunctional enzyme subunit alpha, mitochondrial (LOC410325), mRNA	0	FALSE	284.358	51	29	755	29	764	84.3	9.01	166.15	188.72	132.56	40.53	68.74	169.25	153.72	169.09	18.86	77.7	171.07	133.02	168.28	136.07	113.71	69.63	30.68	73.49	31.05	114.17	19	23	23	15	15	22	19	24	8	15	22	20	23	20
FALSE	High	Master Protein	A0A088A1N5	Uncharacterized protein OS=Apis mellifera OX=7460 GN=LOC552577 PE=4 SV=1		0.001	FALSE	5.587	2	1	1	1	948	103.2	9.79																3.41
FALSE	High	Master Protein	A0A088A1N6	Uncharacterized protein OS=Apis mellifera OX=7460 GN=107965147 PE=4 SV=1	PREDICTED: Apis cerana junctophilin-1 (LOC107995051), transcript variant X2, mRNA	0	FALSE	6.391	14	1	3	1	134	15.3	5.27						3.22							3.15				3.8									1							1
FALSE	High	Master Protein	A0A088A1P0	Uncharacterized protein OS=Apis mellifera OX=7460 GN=vari PE=3 SV=1	PREDICTED: Apis mellifera MAGUK p55 subfamily member 6 (LOC408359), transcript variant X1, mRNA	0	FALSE	146.522	44	19	210	19	603	68.2	6.09	56.64	31.9	19.03	21.49	35.77	75.47	18.73	11.88	13.95	36.53	61.48	15.83	34.44	33.85	12.13	17.41	31.12	40.68	20.43	10.16	11	9	5	9	10	14	5	3	4	9	12	4	11	9
FALSE	High	Master Protein	A0A088A1U2	Uncharacterized protein OS=Apis mellifera OX=7460 PE=4 SV=1		0.001	FALSE	5.199	9	1	2	1	129	15.1	9.83										2.93	2.51																			1	1
FALSE	High	Master Protein	A0A088A204	Uncharacterized protein OS=Apis mellifera OX=7460 GN=mRpS2 PE=3 SV=1	PREDICTED: Apis mellifera 28S ribosomal protein S2, mitochondrial (LOC411862), mRNA	0	FALSE	11.224	11	2	5	2	259	29.6	8.22		2.52									2.92	3.01				1.93		2.3				1									1	1
FALSE	High	Master Protein	A0A088A215	Uncharacterized protein OS=Apis mellifera OX=7460 GN=LOC551061 PE=4 SV=1	PREDICTED: Apis mellifera multidrug resistance-associated protein 4 (LOC551061), transcript variant X2, mRNA	0	FALSE	26.567	5	6	17	6	1392	156.8	8.57	2.14	4.79	2.11			5.11	4.58	5.09		1.94			4.72	2.05	0			2.11		2.84	1	2	1			2	2	1		1			2	1
FALSE	High	Master Protein	A0A088A222	Uncharacterized protein OS=Apis mellifera OX=7460 GN=Aats-val PE=3 SV=1		0	FALSE	9.325	2	2	10	2	1149	133.6	8.16		2.23	0			2.21		0			5.53	2.96	4.68	2.34								1	1			1		1			1	1	2	1
FALSE	High	Master Protein	A0A088A224	Uncharacterized protein OS=Apis mellifera OX=7460 GN=LOC551211 PE=4 SV=1	PREDICTED: Apis mellifera elongation factor 1-gamma (LOC551211), mRNA	0	FALSE	173.006	56	24	274	23	425	49	6.33	77.86	20.17	3.38	12.91	27	108.11	40.54	16.08	18.15	13.54	104.73	17.47	15.3	64.71	10.91	67.14	33.18	29.83	31.21	20.52	13	7	2	6	8	20	12	5	7	6	17	7	4	16
FALSE	High	Master Protein	A0A088A241	Uncharacterized protein OS=Apis mellifera OX=7460 GN=LOC409494 PE=3 SV=1		0	FALSE	9.646	9	2	4	2	300	32.4	9.48							3.37	3.16						2.37				3.39									1	1						1
FALSE	High	Master Protein	A0A088A279	Uncharacterized protein OS=Apis mellifera OX=7460 PE=4 SV=1		0	FALSE	35.588	6	9	30	9	1992	219.6	8.48	0			3.54		2.33	2.34	2.64	1.94	2.22	5.26		2.64	2.7	2.64	7.82	10.21	2.09	4.25		1			3		3	3	1	1	1	2		1	1
FALSE	High	Master Protein	A0A088A287	Uncharacterized protein OS=Apis mellifera OX=7460 PE=4 SV=1		0.001	FALSE	5.14	4	1	1	1	337	37.9	8.22																			2.13
FALSE	High	Master Protein	A0A088A298	Uncharacterized protein OS=Apis mellifera OX=7460 PE=4 SV=1		0	FALSE	7.182	5	1	2	1	299	35	4.89						3.04					3.29															1					1
FALSE	High	Master Protein	A0A088A2A5	Uncharacterized protein OS=Apis mellifera OX=7460 GN=LOC552272 PE=3 SV=1		0	FALSE	47.51	43	6	85	6	143	16	10.56	12.88	4.55	8.62	9.95	11.79	17.56	11.3	10.01	7.87	11.65	17.63	15.02	15.91	16.16	9.91	5.98		8.61	11.19		3	2	2	3	3	4	4	4	4	4	5	5	4	3
FALSE	High	Master Protein	A0A088A2A9	Uncharacterized protein OS=Apis mellifera OX=7460 PE=4 SV=1		0	FALSE	100.602	17	16	134	16	1208	136.8	4.93	7.68	14.15	7.04	26.68	22.44	23.34	7.24	28.92	21.15	45.06	10.89	6.52	6.08	10.91	2.82	11.45	4.21	9.6	13.18	10.68	3	6	3	8	8	8	4	8	9	11	5	3	4	6
FALSE	High	Master Protein	A0A088A2C4	Uncharacterized protein OS=Apis mellifera OX=7460 PE=4 SV=1		0	FALSE	14.381	6	4	7	4	975	114	5.67						2.39					5.84					5.1			3.73							1					2
FALSE	High	Master Protein	A0A088A2D7	Uncharacterized protein OS=Apis mellifera OX=7460 GN=pot PE=4 SV=1		0	FALSE	43.356	9	7	24	7	996	111	6.39	3.09	2.54	2.27	1.92	4.64	2.32	2.84	2.31	2.26	2.69	0	0	4.86	4.95		2.57	7.65	9.31		2.66	1	1	1	1	2	1	1	1	1	1	1	1	2	2
FALSE	High	Master Protein	A0A088A2E4	Uncharacterized protein OS=Apis mellifera OX=7460 PE=4 SV=1		0	FALSE	85.701	18	20	78	20	1501	169.1	6.89	14.5	10.38	12.75	2.03	6.66	12.09	15.69	9.23		13.02	10.11	6.06	10.24	4.34	9.89	11.28	12.63	8.42		7.71	5	4	6	1	4	5	6	4		5	4	3	4	3
FALSE	High	Master Protein	A0A088A2F7	Uncharacterized protein OS=Apis mellifera OX=7460 GN=LOC552419 PE=4 SV=1		0	FALSE	12.5	18	3	3	3	193	22.1	8.05																		8.32
FALSE	High	Master Protein	A0A088A2I0	Uncharacterized protein OS=Apis mellifera OX=7460 PE=4 SV=1		0.003	FALSE	3.387	2	1	1	1	456	51.8	5.01																			1.84
FALSE	High	Master Protein	A0A088A2K9	Uncharacterized protein OS=Apis mellifera OX=7460 PE=4 SV=1		0.001	FALSE	5.544	4	1	1	1	472	50.8	6.76						3.86																				1
FALSE	High	Master Protein	A0A088A2M4	Uncharacterized protein OS=Apis mellifera OX=7460 PE=4 SV=1		0.001	FALSE	4.748	32	1	1	1	60	6.9	4.72						2.32																				1
FALSE	High	Master Protein	A0A088A2R1	Uncharacterized protein OS=Apis mellifera OX=7460 GN=LOC409411 PE=4 SV=1		0	FALSE	7.509	8	2	6	2	259	29.3	9.23		2.15					2				2.13		1.94	2.09				2.2				1					1				1		1	1
FALSE	High	Master Protein	A0A088A2R3	Uncharacterized protein OS=Apis mellifera OX=7460 GN=LOC409586 PE=3 SV=1	PREDICTED: Apis mellifera NADH dehydrogenase [ubiquinone] 1 beta subcomplex subunit 9 (LOC409586), mRNA	0	FALSE	52.907	54	9	129	9	145	17.4	9.42	26.98	23.73	30.26	4.42	3.79	22.19	21.1	31.3	19.72	26.91	18.93	12.63	19.89	12.35	15.05	6.27	19.04	10.46	5.7	6.16	8	6	6	3	3	5	3	7	6	5	4	1	3	2
FALSE	High	Master Protein	A0A088A2S3	Uncharacterized protein OS=Apis mellifera OX=7460 GN=nito PE=4 SV=1		0.003	FALSE	3.418	1	1	3	1	771	88	9.51							1.65											1.7									1
FALSE	High	Master Protein	A0A088A2T0	Uncharacterized protein OS=Apis mellifera OX=7460 PE=4 SV=1		0	FALSE	52.733	9	9	27	9	1239	144.1	9.17	4.13		8.05	5.98	3.39	6.25	5.58	3.6	10.37	0	2.12		2.52	3.38		9.11	2.69	9.32			1		2	2	1	1	1	1	4	1	1		2	1
FALSE	High	Master Protein	A0A088A2T2	Uncharacterized protein OS=Apis mellifera OX=7460 GN=stmA PE=4 SV=1		0	FALSE	7.485	2	1	9	1	820	92.7	6.83	3.93		2.36			3.9	7.7	4.39			2.81	3.54		3.05							1		1			1	1	1			1	1		1
FALSE	High	Master Protein	A0A088A2Y3	Uncharacterized protein OS=Apis mellifera OX=7460 PE=4 SV=1	PREDICTED: Apis mellifera proteoglycan 4 (LOC408561), transcript variant X1, mRNA	0	FALSE	160.516	51	23	226	23	663	72.2	8.19	57.9	31.12	21.45	36.75	43.27	64.6	29.49	30.14	52.52	21.2	31.8	22.27	29.78	27.8	11.18	21.37	31.71	25.31	8.01	0	14	8	7	11	10	16	9	8	13	7	9	6	8	8
FALSE	High	Master Protein	A0A088A2Z8	Uncharacterized protein OS=Apis mellifera OX=7460 GN=mRpL17 PE=4 SV=1		0	FALSE	5.868	7	1	5	1	180	21.3	9.82					2.05			3.24			3.26		3.48		2.07										1			1			1		1
FALSE	High	Master Protein	A0A088A314	Uncharacterized protein OS=Apis mellifera OX=7460 GN=LOC726894 PE=4 SV=1		0.005	FALSE	2.961	10	1	1	1	107	12.3	8.53			2.78																				1
FALSE	High	Master Protein	A0A088A315	Uncharacterized protein OS=Apis mellifera OX=7460 PE=4 SV=1		0.002	FALSE	3.898	3	1	1	1	573	62.9	6.62		2.85																				1
FALSE	High	Master Protein	A0A088A330	Uncharacterized protein OS=Apis mellifera OX=7460 GN=LOC552786 PE=4 SV=1	PREDICTED: Apis mellifera charged multivesicular body protein 2a (LOC552786), transcript variant X1, mRNA	0	FALSE	14.966	19	3	8	3	227	25.8	5.62	3.85		3.27	0				2.12			4.19					4.69			3.15		1		2	1				1			1
FALSE	High	Master Protein	A0A088A367	Uncharacterized protein OS=Apis mellifera OX=7460 PE=4 SV=1		0	FALSE	31.045	24	7	18	7	354	40.5	5.3	2.27	2.84			1.69	3.92			1.97	2.25			2.25		7.32	2.99		2.79		7.47	1	1			1	1			1	2			1
FALSE	High	Master Protein	A0A088A371	Uncharacterized protein OS=Apis mellifera OX=7460 GN=LOC726569 PE=4 SV=1		0.002	FALSE	4.243	5	1	1	1	220	25.5	9.39																2.39
FALSE	High	Master Protein	A0A088A376	Uncharacterized protein OS=Apis mellifera OX=7460 PE=3 SV=1	PREDICTED: Apis mellifera myosin-VIIa (LOC726683), transcript variant X3, mRNA	0	FALSE	78.287	11	15	66	15	2094	242.9	9.07	7.37	9.48	2.27	2.22	6.55	12.89	21.95	16.01	0	12.7	22.95	11.51	13.39	14.31	11.87	1.64	2.7			2.46	4	2	1	1	2	3	6	4	1	4	6	4	3	6
FALSE	High	Master Protein	A0A088A390	Uncharacterized protein OS=Apis mellifera OX=7460 GN=Ndufa5 PE=4 SV=1	PREDICTED: Apis mellifera NADH dehydrogenase [ubiquinone] 1 alpha subcomplex subunit 5 (LOC413014), mRNA	0	FALSE	61.226	69	7	135	7	118	13.8	8.37	20.73	37.55	23.69	10.9	14.27	17.28	22.36	34.09	29.11	31.44	18.09	15.95	25.44	19.54	19.89	19.67	29.39	15.44	8.55	15.56	4	5	4	3	3	3	4	6	7	6	3	3	5	4
FALSE	High	Master Protein	A0A088A395	Uncharacterized protein OS=Apis mellifera OX=7460 PE=3 SV=1	PREDICTED: Apis mellifera EH domain-containing protein 3 (LOC413012), mRNA	0	FALSE	118.082	48	21	162	21	534	60.9	6.83	36.03	19.84	2.4	4.59	4.24	45.5	23.86	13.51	6.75	2.56	50.64	23.29	21.36	33.67	15.56	13.76	19.95	33.22	7.41	19.17	10	7	2	5	5	11	7	5	6	3	12	9	7	10
FALSE	High	Master Protein	A0A088A3A2	Uncharacterized protein OS=Apis mellifera OX=7460 GN=mge PE=4 SV=1	PREDICTED: Apis mellifera mitochondrial import receptor subunit TOM22 homolog (LOC409500), mRNA	0	FALSE	30.361	58	5	34	5	143	15.7	4.23	7.71	3.15	5.72			4.92	10.36	5.9	2.14	5.65	9.05		6.54	3.12	5.87	6.57	3.26	8.56	6.79		2	1	1			2	3	1	1	1	2		2	1
FALSE	High	Master Protein	A0A088A3B9	Uncharacterized protein OS=Apis mellifera OX=7460 GN=LOC413796 PE=3 SV=1	PREDICTED: Apis mellifera methionine--tRNA ligase, cytoplasmic (LOC413796), transcript variant X1, mRNA	0	FALSE	22.688	12	6	34	6	960	109.5	8.13	9.19	5.33	0			11.16	5.12	2.49		0	8.31	3.3	2.26	2.17	0	0	2.37			2.04	3	2	2			3	2	2		1	2	1	1	1
FALSE	High	Master Protein	A0A088A3C2	Uncharacterized protein OS=Apis mellifera OX=7460 GN=LOC413204 PE=4 SV=1		0	FALSE	6.203	6	2	7	1	284	32.9	5.19		1.96	1.83	3.36	1.69		1.97		0													1	1	1	1		1		1
FALSE	High	Master Protein	A0A088A3D0	Uncharacterized protein OS=Apis mellifera OX=7460 PE=4 SV=1		0	FALSE	10.918	28	1	12	1	124	11.2	10.1			8.4	9.05	12.11		4.62			4.06			4.54	2.99	2.89								1	1	1		1			1			1	1
FALSE	High	Master Protein	A0A088A3I7	Uncharacterized protein OS=Apis mellifera OX=7460 GN=Vps4 PE=3 SV=1		0	FALSE	26.996	29	8	24	8	441	49.3	6.49					2.06	5.98	4.94	2.85	2.54		2.41			4.29	2.25	4.68	6.09	4.37	2.06						1	2	2	2	1		2			2
FALSE	High	Master Protein	A0A088A3I9	Uncharacterized protein OS=Apis mellifera OX=7460 GN=LOC409755 PE=4 SV=1		0	FALSE	115.148	59	20	187	20	365	41.7	6.49	28.99	19.23	13.52	15.54	5.76	50.35	36.85	30.86	24.33	16.4	32.48	16.97	26.6	37.42	7.13	40.57	17.94	33.65	18.29	13.63	7	5	5	5	3	12	9	9	8	7	10	8	11	10
FALSE	High	Master Protein	A0A088A3K0	Uncharacterized protein OS=Apis mellifera OX=7460 GN=snapin PE=4 SV=1	PREDICTED: Apis mellifera SNAPIN protein homolog (LOC725747), mRNA	0	FALSE	8.658	13	1	12	1	158	18.1	5.08	0	3.49			0	3.23	2.38		0		3.28	2.84	2.07	0			3.66				1	1			1	1	1		1		1	1	1	1
FALSE	High	Master Protein	A0A088A3M1	Uncharacterized protein OS=Apis mellifera OX=7460 GN=LOC410115 PE=3 SV=1		0	FALSE	40.627	28	9	42	9	417	46.8	5.99	13.65	2.58	1.94	0		15.73	11.05	2.12	4.18		12.85	3.76	2.32	10.14	1.74	5.12		0	2.56	2.68	4	1	1	1		3	4	1	2		3	2	1	2
FALSE	High	Master Protein	A0A088A3R4	Uncharacterized protein OS=Apis mellifera OX=7460 GN=100576174 PE=4 SV=1		0.001	FALSE	5.405	10	2	14	2	155	18.1	6.16	4.37		0	0	0	1.67	0	2.48		1.6								4.41	0		2		1	1	1	1	1	2		1
FALSE	High	Master Protein	A0A088A3U0	Uncharacterized protein OS=Apis mellifera OX=7460 GN=LOC408564 PE=4 SV=1		0	FALSE	7.346	2	1	9	1	648	73.1	9.19						3.47	2.96	3.77		3.1	3.68	2.71	3.11	3.25	3.08											1	1	1		1	1	1	1	1
FALSE	High	Master Protein	A0A088A3U8	Uncharacterized protein OS=Apis mellifera OX=7460 GN=Rab14 PE=4 SV=1	PREDICTED: Apis mellifera ras-related protein Rab-14 (LOC413614), mRNA	0	FALSE	31.529	33	6	49	5	218	24.3	6.68	8.66	13.42	5.41	4.93	2.44	10.85	10.59	19.17	2.47	2.41	7.63	2.21		4.85	16.39	8.55		16.85	4.6	2.89	3	4	2	2	1	3	4	4	1	1	3	1		2
FALSE	High	Master Protein	A0A088A3W1	Uncharacterized protein OS=Apis mellifera OX=7460 GN=CPR15 PE=4 SV=1		0	FALSE	78.387	12	8	81	8	442	42.4	5.03	20.76		42.31	40.08	16.99	9.32	2.36	15.65	21.68		6.89	7.4		17.44	19.73	8.09	5.94	27.39	32.82	8.46	3		4	4	3	2	1	3	3		2	2		3
FALSE	High	Master Protein	A0A088A3W2	Uncharacterized protein OS=Apis mellifera OX=7460 PE=4 SV=1		0	FALSE	15.472	5	5	9	5	1023	116.5	5.5						5.35					4.66					4.53	4.78									2					3
FALSE	High	Master Protein	A0A088A3Y0	Uncharacterized protein OS=Apis mellifera OX=7460 GN=TcTex1 PE=4 SV=1		0	FALSE	7.56	16	1	5	1	112	12.5	5.39		3.53				5.25	3.41	3.56			4.99											1				1	1	1			1
FALSE	High	Master Protein	A0A088A411	Uncharacterized protein OS=Apis mellifera OX=7460 PE=4 SV=1		0	FALSE	30.11	13	7	22	7	676	74.1	9.14			3.68	1.7		4.84	1.64	2.2	3.97	2.27	4.83	2.35	2.29	2.29	1.71	2.15		11.61					1	1		2	1	1	3	1	2	1	1	1
FALSE	High	Master Protein	A0A088A432	Uncharacterized protein OS=Apis mellifera OX=7460 PE=4 SV=1		0	FALSE	27.65	11	7	13	7	901	103.2	8	4.63					3.56	2.82		0		0					2.14		3.27	3.42		2					2	1		1		1
FALSE	High	Master Protein	A0A088A448	Uncharacterized protein OS=Apis mellifera OX=7460 PE=3 SV=1	PREDICTED: Apis mellifera UMP-CMP kinase (LOC100578311), transcript variant X1, mRNA	0	FALSE	56.84	52	9	85	9	180	20.4	5.71	14.79		3.62	10.42	6.33	27.98	3.43	7.23	4.06		23.57	13.3	5.33	20.65	3.43	7.95	5.59	12.7	7.44	7.93	4		1	4	2	6	2	2	3		5	2	2	5
FALSE	High	Master Protein	A0A088A460	Uncharacterized protein OS=Apis mellifera OX=7460 PE=3 SV=1		0	FALSE	26.7	17	5	16	3	367	42.3	4.51		3.53				8.9	3.29				5.86					2.66		3.21	7.62	13.97		1				3	1				2
FALSE	High	Master Protein	A0A088A464	Uncharacterized protein OS=Apis mellifera OX=7460 GN=LOC410054 PE=4 SV=1		0	FALSE	21.725	16	5	12	5	529	58.4	5.21						5.43	2.99	2.21	0		2.48	0				0	12.15									1	2	1	1		1	1
FALSE	High	Master Protein	A0A088A494	Uncharacterized protein OS=Apis mellifera OX=7460 GN=LOC725680 PE=4 SV=1	PREDICTED: Apis mellifera vesicle-fusing ATPase 1 (LOC725680), mRNA	0	FALSE	74.754	32	15	75	14	743	82.6	7.33	8.05	15.32	2.1			33.58	21.29	13.49	1.95	0	18.06	13.83	5.84	17.58	10.93	13.36	3.53	10.5		4.38	2	3	2			9	6	4	2	2	5	3	2	6
FALSE	High	Master Protein	A0A088A4B1	Uncharacterized protein OS=Apis mellifera OX=7460 PE=4 SV=1	PREDICTED: Apis mellifera sodium/potassium-transporting ATPase subunit beta-2 (LOC725991), mRNA	0	FALSE	15.789	5	2	22	2	705	81.3	8.28	6.52	3.85	3.6			3.65	6.08	7.44	2.89	3.96	3.45	2.89	3.65	6.77	5.57	6.43		2.84		2.68	1	1	1			1	1	1	1	1	1	1	1	2
FALSE	High	Master Protein	A0A088A4C9	Uncharacterized protein OS=Apis mellifera OX=7460 PE=4 SV=1	PREDICTED: Apis mellifera protein crumbs (LOC725591), transcript variant X1, mRNA	0.001	FALSE	5.461	1	2	4	2	2158	236	4.7											0	0					0	0													1	1
FALSE	High	Master Protein	A0A088A4D4	Uncharacterized protein OS=Apis mellifera OX=7460 GN=LOC408722 PE=4 SV=1	PREDICTED: Apis mellifera sodium/potassium-transporting ATPase subunit beta-2 (LOC408722), mRNA	0	FALSE	6.083	7	2	13	1	315	36	7.97	0	0	0			0	0	0		0			2.87		0						1	1	1			1	1	1		1			2
FALSE	High	Master Protein	A0A088A4D5	Uncharacterized protein OS=Apis mellifera OX=7460 GN=nrv2 PE=4 SV=1	PREDICTED: Apis mellifera sodium/potassium-transporting ATPase subunit beta-2 (LOC410905), mRNA	0	FALSE	84.848	57	12	128	11	322	36.9	7.91	34.5	28.48	31.4	10.96	6.82	26.88	17.54	41.66	0	17.11	30.64	18.56	24.97	22.81	8.58	10.87	17.72	6.33			6	6	8	3	3	7	5	9	2	5	6	5	6	6
FALSE	High	Master Protein	A0A088A4D7	Uncharacterized protein OS=Apis mellifera OX=7460 GN=LOC410906 PE=4 SV=1		0	FALSE	17.379	11	3	22	2	369	43.5	8.72	0	2.79				2.86	2.79	2.25		4.67		4.89	7.42	4.53	5.08		3.03	2.58	2.76	2.52	1	2				1	1	1		2		1	2	2
FALSE	High	Master Protein	A0A088A4H6	Uncharacterized protein OS=Apis mellifera OX=7460 GN=411958 PE=3 SV=1		0.005	FALSE	3.092	1	1	1	1	904	104.1	7.39													1.75																				1
FALSE	High	Master Protein	A0A088A4K3	Uncharacterized protein OS=Apis mellifera OX=7460 GN=LOC409485 PE=3 SV=1	PREDICTED: Apis mellifera cytoplasmic aconitate hydratase (LOC409485), mRNA	0	FALSE	23.673	8	5	9	5	890	98.8	6.95						9.64	2.64							2.27			8.41			2.24						3	1							1
FALSE	High	Master Protein	A0A088A4K9	Uncharacterized protein OS=Apis mellifera OX=7460 PE=4 SV=1	Apis mellifera odorant binding protein 14 (Obp14), mRNA	0	FALSE	9.502	23	2	2	2	130	14.9	5.91																				6.41
FALSE	High	Master Protein	A0A088A4P9	Uncharacterized protein OS=Apis mellifera OX=7460 PE=3 SV=1	PREDICTED: Apis mellifera T-complex protein 1 subunit zeta (LOC551295), mRNA	0	FALSE	66.255	35	13	79	13	529	58.2	6.71	11.68	11.78	0	2.05	2.05	20.59	19.9	2.84		0	23.96	12.5		13.48	4.52	17.15	3.14	21.34	15.79	4.85	4	2	2	1	1	5	5	1		1	6	3		5
FALSE	High	Master Protein	A0A088A4T4	Uncharacterized protein OS=Apis mellifera OX=7460 PE=4 SV=1	PREDICTED: Apis mellifera endocuticle structural glycoprotein SgAbd-8-like (LOC724735), transcript variant X1, mRNA	0	FALSE	23.322	33	4	44	4	161	17.8	5.54	2.77	3.01	14.42	2.97	12.71	5.51	4.82	5.43	12.99	7.48	6.28	5.2	5.85		6.02	3.56	3.09	6.63	8.56	11.65	1	1	3	1	2	2	2	2	2	2	2	2	2
FALSE	High	Master Protein	A0A088A4U6	Uncharacterized protein OS=Apis mellifera OX=7460 GN=CPR17 PE=4 SV=1	Apis mellifera cuticular protein 17 (CPR17), mRNA	0	FALSE	33.696	27	3	125	3	158	17.5	6.3	11.8	1.7	20.33	3.51	8.58	12.79	10.8	8.89	16.53	0	8.6	4.19	13.21	8.6	6.49	21.93	18.42	111.16	41.44	15.96	2	1	3	2	3	2	2	2	2	1	2	2	2	2
FALSE	High	Master Protein	A0A088A4U8	Uncharacterized protein OS=Apis mellifera OX=7460 PE=4 SV=1		0	FALSE	78.846	49	4	1640	4	185	19.7	4.45	121.57	63.09	68.22	68.54	89.58	95.35	41.37	115.22	43.15	93.19	92.29	82.33	96.7	83.23	77.74	388.62	137.63	708.39	286.29	445.69	3	3	3	3	3	3	3	3	3	3	3	3	3	3
FALSE	High	Master Protein	A0A088A4X3	Uncharacterized protein OS=Apis mellifera OX=7460 GN=Trap1 PE=3 SV=1	PREDICTED: Apis mellifera heat shock protein 75 kDa, mitochondrial (LOC550968), mRNA	0	FALSE	41.448	12	7	28	7	693	79.5	8.32	0		2.82			13.38	7.56		2.01		6.66	5.16	5.34	0	0	0		9			1		1			4	2		1		3	2	4	1
FALSE	High	Master Protein	A0A088A4Z4	Uncharacterized protein OS=Apis mellifera OX=7460 GN=IGFn3-12 PE=4 SV=1		0	FALSE	20.222	8	5	9	5	778	87.2	6.51	5.5					2.41				2.15	0			2.28		5.04					2					1				1	1			2
FALSE	High	Master Protein	A0A088A500	Uncharacterized protein OS=Apis mellifera OX=7460 PE=3 SV=1		0.002	FALSE	4.038	6	1	1	1	263	28.8	8.31	2.33																				1
FALSE	High	Master Protein	A0A088A503	Uncharacterized protein OS=Apis mellifera OX=7460 GN=Cyc1 PE=4 SV=1	PREDICTED: Apis mellifera cytochrome c1, heme protein, mitochondrial (LOC413605), transcript variant X1, mRNA	0	FALSE	118.761	45	8	280	8	311	34.9	8.12	59.76	66.92	68.96	38.87	37.96	49.82	54.81	63.98	20.24	50.37	51.87	37.81	54.96	39.99	48.41	46.47	26.55	42.56	44.67	51.14	7	7	7	6	6	7	7	7	4	7	7	5	6	7
FALSE	High	Master Protein	A0A088A510	Uncharacterized protein OS=Apis mellifera OX=7460 GN=tral PE=4 SV=1		0	FALSE	18.184	11	4	5	4	509	55.4	9.31	5.48					3.85					2.07						3.99				2					1					1
FALSE	High	Master Protein	A0A088A558	Uncharacterized protein OS=Apis mellifera OX=7460 GN=ebony PE=4 SV=1	PREDICTED: Apis mellifera mycosubtilin synthase subunit C (LOC409109), transcript variant X1, mRNA	0	FALSE	85.173	31	16	40	16	860	98.2	5.15						0	5.42	7.15			42.89	0		0	0	4.43	16.36	7.02								1	2	4			11	1		2
FALSE	High	Master Protein	A0A088A569	Uncharacterized protein OS=Apis mellifera OX=7460 PE=4 SV=1		0	FALSE	7.386	41	2	20	2	64	7.6	4.61		2.39	2.51			3.42		3.87	1.81	5	1.86	1.76	4.11	1.84	1.85	1.65	2.07	1.96		3.56		1	1			1		1	1	2	1	1	1	1
FALSE	High	Master Protein	A0A088A5A6	Uncharacterized protein OS=Apis mellifera OX=7460 GN=LOC409481 PE=3 SV=1		0	FALSE	76.091	71	11	202	10	182	20.7	6.58	31.46	26.66	27.81	25.98	13.03	29.84	22.39	29.31	17.56	7.81	36.57	15.56	26.97	34.13	24.4	24.41	3.23	21.97	15.43	11.85	7	6	6	7	6	7	6	7	7	3	8	5	6	7
FALSE	High	Master Protein	A0A088A5C5	Uncharacterized protein OS=Apis mellifera OX=7460 GN=LOC724680 PE=4 SV=1		0	FALSE	22.425	48	4	42	4	128	15.3	5.74	13.74	8.23	13.16	7.93	5.77	2	2.96	7.86	2.53	2.21	6.73	5.11	9.24	3.35	7.47	5.42	3.3		3.12		4	2	3	3	2	1	2	2	1	1	1	1	2	1
FALSE	High	Master Protein	A0A088A5E0	Uncharacterized protein OS=Apis mellifera OX=7460 GN=102656491 PE=4 SV=1	PREDICTED: Apis mellifera signal peptidase complex subunit 1 (LOC102656491), mRNA	0	FALSE	7.581	17	1	5	1	95	11	9.94						0		2.57					3.12	2.74	3.64											1		1					1	1
FALSE	High	Master Protein	A0A088A5E3	Uncharacterized protein OS=Apis mellifera OX=7460 GN=Vps26 PE=4 SV=1		0.002	FALSE	3.955	5	1	1	1	374	42.5	6.3																				3.21
FALSE	High	Master Protein	A0A088A5E4	Uncharacterized protein OS=Apis mellifera OX=7460 GN=LOC409739 PE=4 SV=1	PREDICTED: Apis mellifera motile sperm domain-containing protein 2 (LOC409739), mRNA	0	FALSE	19.097	9	3	13	3	493	56.6	7.24		2.2					5.82	5.45			0		5.12		0		2.62	2.19	0	0		1					2	2			1		2
FALSE	High	Master Protein	A0A088A5F7	Uncharacterized protein OS=Apis mellifera OX=7460 GN=LOC725740 PE=4 SV=1		0.004	FALSE	3.243	3	1	1	1	373	44.3	9.74																		1.68
FALSE	High	Master Protein	A0A088A5I7	Uncharacterized protein OS=Apis mellifera OX=7460 PE=4 SV=1		0	FALSE	1456.82	38	191	2344	191	6182	662.9	6.27	566.64	393.35	191.16	246.76	239.6	535.91	397.91	359.42	372.76	320.47	519.58	346.86	472.9	332.1	186.79	358.54	442.36	423.74	208.7	69.2	112	76	56	66	67	104	89	80	101	74	102	76	93	68
FALSE	High	Master Protein	A0A088A5J1	Uncharacterized protein OS=Apis mellifera OX=7460 GN=Droj2 PE=3 SV=1	PREDICTED: Apis mellifera dnaJ homolog subfamily A member 1 (LOC724368), transcript variant X1, mRNA	0	FALSE	90.643	50	14	162	14	399	44.8	6.61	27.93	28.02	16.97	9.64	9.39	54.67	34.79	29.22	10.04	17.33	46.42	34.56	23.32	28.98	17.63	21.39	23.8	14.02	6.33	19.31	7	5	4	4	3	10	8	7	6	5	8	8	7	7
FALSE	High	Master Protein	A0A088A5N5	Uncharacterized protein OS=Apis mellifera OX=7460 GN=LOC726955 PE=4 SV=1		0.002	FALSE	4.364	5	1	2	1	252	29.4	8.35							2.53					2.94															1					1
FALSE	High	Master Protein	A0A088A5N6	Uncharacterized protein OS=Apis mellifera OX=7460 PE=4 SV=1	PREDICTED: Apis mellifera laminin subunit gamma-1 (LOC409474), mRNA	0	FALSE	910.12	57	91	2422	91	1585	176.6	5.27	361.07	313.93	214.85	348.96	399.3	348.34	302.59	361.72	294.1	372.35	290.08	332.45	304.58	282.96	300.83	242.11	379.19	352.49	386.19	322.23	56	51	53	62	66	54	53	54	53	56	47	57	51	50
FALSE	High	Master Protein	A0A088A5P8	Uncharacterized protein OS=Apis mellifera OX=7460 GN=100577504 PE=4 SV=1		0	FALSE	14.601	5	2	7	2	788	88.1	5.29						3.77	3.74				3.99	4.86				2.65	5	3.15								1	1				1	1
FALSE	High	Master Protein	A0A088A5R3	Uncharacterized protein OS=Apis mellifera OX=7460 GN=Rab21 PE=4 SV=1		0	FALSE	7.651	10	2	3	2	222	25	6.64		2.76																2.3		2.85		1
FALSE	High	Master Protein	A0A088A5R5	Uncharacterized protein OS=Apis mellifera OX=7460 PE=4 SV=1		0	FALSE	7.937	22	2	7	2	119	13.4	7.37	2.28	2.75	0					2.72									2.45	2.74		2.56	1	1	1					1
FALSE	High	Master Protein	A0A088A5V3	Uncharacterized protein OS=Apis mellifera OX=7460 GN=kinesin-4A PE=3 SV=1		0.001	FALSE	5.672	2	2	2	2	1485	165.9	6.96											2.71																				2
FALSE	High	Master Protein	A0A088A5W0	Uncharacterized protein OS=Apis mellifera OX=7460 PE=4 SV=1		0	FALSE	106.622	12	13	151	9	1362	152.3	5.27	22	16.94	28.45	11.78	6.56	20.41	37.47	48.18	21.63	25.67	36.25	19.69	29.66	28.23	13.9	2.58	19.95	13.86	2.54	5.09	4	3	6	4	2	4	7	10	8	6	5	4	5	4
FALSE	High	Master Protein	A0A088A5W4	Uncharacterized protein OS=Apis mellifera OX=7460 PE=4 SV=1		0.001	FALSE	4.664	1	1	1	1	1291	146.1	4.96																		1.88
FALSE	High	Master Protein	A0A088A5W9	Uncharacterized protein OS=Apis mellifera OX=7460 GN=Unc-89 PE=4 SV=1	PREDICTED: Apis mellifera obscurin (LOC408830), transcript variant X1, mRNA	0	FALSE	1316.93	40	180	2446	179	5693	641.3	5.62	572.37	307.62	203.11	129.62	109.06	617.84	356.3	541.15	144.91	372.39	507.82	266.23	506.67	442.34	161.39	433.23	257.4	340.12	264.17	210.87	113	70	60	49	42	115	81	109	55	87	106	70	102	91
FALSE	High	Master Protein	A0A088A5X1	Uncharacterized protein OS=Apis mellifera OX=7460 GN=Vps25 PE=4 SV=1		0.001	FALSE	5.261	9	1	3	1	175	20.5	5		2.76									3.54			2.74								1									1			1
FALSE	High	Master Protein	A0A088A5Z6	Uncharacterized protein OS=Apis mellifera OX=7460 GN=LOC726653 PE=4 SV=1		0	FALSE	12.583	21	2	13	2	116	12.8	10.08		2.84					6.03	3.54		0	5.54		3.59	0		0		3.51				1					2	1		1	2		2	1
FALSE	High	Master Protein	A0A088A612	Uncharacterized protein OS=Apis mellifera OX=7460 GN=RpS16 PE=3 SV=1		0	FALSE	22.804	43	7	115	7	148	16.9	10.18	10.09	13.98	11.27	6.4	7.82	11.94	6.26	7.66	1.95	9.74	9.47	3.75	9.21	11.54	7.26	10.24	5.65	21.04	12.79	14.4	4	4	4	4	3	4	3	4	3	4	4	2	4	4
FALSE	High	Master Protein	A0A088A633	Uncharacterized protein OS=Apis mellifera OX=7460 GN=LOC725146 PE=4 SV=1		0	FALSE	30.226	20	6	92	6	300	34.5	9.69	6.31	10.82	11.5	3.92	3.91	8.87	19.96	18.21		9.55	18.57	16.47	17.46	12.23	7.04	6.14		23.13	11.15	4.2	3	3	4	3	2	5	6	6		4	4	5	5	3
FALSE	High	Master Protein	A0A088A656	Uncharacterized protein OS=Apis mellifera OX=7460 PE=4 SV=1	PREDICTED: Apis mellifera papilin (LOC413021), transcript variant X1, mRNA	0	FALSE	1046.71	45	97	2759	97	2885	316.3	4.72	352.57	461.82	293.79	346.94	400.04	329.61	392.58	604.09	230.53	504.01	410.14	410.88	445.34	298.05	359.2	118.52	243.08	248.98	156.35	372.14	67	72	60	66	79	65	68	81	65	78	70	68	72	62
FALSE	High	Master Protein	A0A088A661	Uncharacterized protein OS=Apis mellifera OX=7460 GN=Aats-trp PE=3 SV=1	PREDICTED: Apis mellifera tryptophan--tRNA ligase, cytoplasmic (LOC727582), mRNA	0	FALSE	24.257	15	4	27	4	410	46.7	7.34	2.06	2.12	2.17	2.48	0	6.96	6.03	5.92	2.18	0	10.95	6.08	2.86	3.86	2.06	3.93		3.96			1	1	1	2	1	2	2	2	1	1	3	2	1	1
FALSE	High	Master Protein	A0A088A6M3	Uncharacterized protein OS=Apis mellifera OX=7460 PE=4 SV=1	PREDICTED: Apis mellifera translocon-associated protein subunit alpha (LOC551353), mRNA	0	FALSE	12.604	12	2	10	2	296	33.4	5.06			6.22				7.65	6.74					3.55			3.03	3.67			3.16			2				2	2					1
FALSE	High	Master Protein	A0A088A6M9	Uncharacterized protein OS=Apis mellifera OX=7460 GN=RpL12 PE=3 SV=1		0	FALSE	57.902	61	8	134	8	165	17.9	9.69	29.31	16.11	10.69	2.38	12.95	30.39	21.24	27.21	5.87	16.1	33	20.2	25.06	33.8	22.24	12.07	15.96	12.88	7.57		5	4	5	1	5	4	4	4	3	4	5	4	4	5
FALSE	High	Master Protein	A0A088A6Q9	Uncharacterized protein OS=Apis mellifera OX=7460 PE=4 SV=1	PREDICTED: Apis mellifera kynurenine--oxoglutarate transaminase 3-like (LOC724811), transcript variant X1, mRNA	0	FALSE	19.194	43	3	6	3	122	13.8	9.73						10.57					3.5						2.45			3.7						3					1
FALSE	High	Master Protein	A0A088A6T0	Uncharacterized protein OS=Apis mellifera OX=7460 PE=3 SV=1	PREDICTED: Apis mellifera dynamin (LOC410923), transcript variant X1, mRNA	0	FALSE	21.221	7	4	5	4	909	101.7	8.25						4.71	0										2.43			2.86						2	1
FALSE	High	Master Protein	A0A088A6U0	Uncharacterized protein OS=Apis mellifera OX=7460 PE=4 SV=1		0	FALSE	88.839	10	13	71	13	1870	206.5	5.92	22.03	7.53	2.64	1.72	4.83	23.3	17.46	6.48	2.47	6.76	11.83	3.3	12.31	11.42		11.13	13.15	11.46	4.87		6	3	1	3	2	6	4	2	4	2	3	1	5	3
FALSE	High	Master Protein	A0A088A6Y5	Uncharacterized protein OS=Apis mellifera OX=7460 GN=LOC727354 PE=4 SV=1	PREDICTED: Apis mellifera vacuolar protein sorting-associated protein VTA1 homolog (LOC727354), transcript variant X1, mRNA	0	FALSE	22.298	21	4	8	4	286	32.5	5.1		2.34				4.23					3.67			0			5.66	2.5	2.79			1				1					1			1
FALSE	High	Master Protein	A0A088A6Z1	Uncharacterized protein OS=Apis mellifera OX=7460 GN=Ef1beta PE=4 SV=1	PREDICTED: Apis mellifera elongation factor 1-beta' (LOC552649), mRNA	0	FALSE	76.177	65	10	106	10	217	24.6	4.79	29.29	18.23				38.27	17.99	6.16	9.99	11.91	44.17	11.64	0	23.89		19.03	37.74	14.59	8.2	13.57	5	5				6	4	2	3	4	7	2	1	4
FALSE	High	Master Protein	A0A088A6Z2	Uncharacterized protein OS=Apis mellifera OX=7460 GN=Lys-3 PE=4 SV=1	PREDICTED: Apis mellifera lysozyme (LOC409663), mRNA	0.004	FALSE	3.145	7	1	2	1	153	17.1	4.88																0			0
FALSE	High	Master Protein	A0A088A6Z4	Uncharacterized protein OS=Apis mellifera OX=7460 PE=3 SV=1	Apis mellifera NADH dehydrogenase (ubiquinone) Fe-S protein 1, 75kDa (NADH-coenzyme Q reductase) (Ndufs1), mRNA	0	FALSE	260.303	60	34	461	34	711	78.4	6.05	100.18	80.37	107.5	36.98	37.47	107.58	75.47	105.26	68.1	83.29	96.64	76.56	99.26	73.07	76.94	53.62	23.09	35.89	34.85	49.34	22	18	22	10	11	22	16	23	20	20	22	18	21	16
FALSE	High	Master Protein	A0A088A6Z7	Uncharacterized protein OS=Apis mellifera OX=7460 GN=LOC551755 PE=4 SV=1		0	FALSE	6.719	20	2	26	2	156	17.7	9.73	7.72	5.04	5.09	2.17		6.42	4.53	5.09			4.68	2.27	2.43	4.79	6.41						1	1	2	1		1	1	1			1	1	1	1
FALSE	High	Master Protein	A0A088A704	Uncharacterized protein OS=Apis mellifera OX=7460 GN=100576748 PE=4 SV=1		0	FALSE	9.128	24	2	4	2	127	14.3	9.09				3.11	5.36															4.15				1	2
FALSE	High	Master Protein	A0A088A722	Uncharacterized protein OS=Apis mellifera OX=7460 PE=4 SV=1	PREDICTED: Apis mellifera renin receptor (LOC552228), transcript variant X2, mRNA	0	FALSE	13.419	12	3	7	3	432	48.4	5.78	3.04					4.24			2.09			2.63					2.87	0			1					1			2			1
FALSE	High	Master Protein	A0A088A730	Uncharacterized protein OS=Apis mellifera OX=7460 PE=4 SV=1		0	FALSE	17.513	27	4	7	4	273	29.8	6.8									2.4		0		0			3.15	3.65	3.94	1.64										1		1		1
FALSE	High	Master Protein	A0A088A763	Uncharacterized protein OS=Apis mellifera OX=7460 PE=4 SV=1	PREDICTED: Apis mellifera 39S ribosomal protein L42, mitochondrial (LOC102656685), transcript variant X1, mRNA	0	FALSE	6.08	22	1	1	1	96	11.6	9.07						4.05																				1
FALSE	High	Master Protein	A0A088A768	Uncharacterized protein OS=Apis mellifera OX=7460 GN=Ndufs4 PE=4 SV=1	PREDICTED: Apis mellifera NADH dehydrogenase [ubiquinone] iron-sulfur protein 4, mitochondrial (LOC727599), mRNA	0	FALSE	48.161	51	7	41	7	186	21.6	9.52	8.24	10.13	6.81		4.01	15.99	9.6	12.14	6.34	12.39	12.19	7.84	11.89	8.24	8.63					2.07	2	2	2		1	5	3	3	2	3	4	2	3	2
FALSE	High	Master Protein	A0A088A786	Uncharacterized protein OS=Apis mellifera OX=7460 GN=Nmdmc PE=3 SV=1		0	FALSE	7.955	9	2	2	2	336	37.1	9.33						1.96					2.42															1					1
FALSE	High	Master Protein	A0A088A787	Uncharacterized protein OS=Apis mellifera OX=7460 PE=3 SV=1	PREDICTED: Apis mellifera bifunctional methylenetetrahydrofolate dehydrogenase/cyclohydrolase, mitochondrial (LOC551667), transcript variant X1, mRNA	0	FALSE	8.499	11	2	4	2	325	35.7	8.27			1.69			3.23							2.84	3.28									1			1							1	1
FALSE	High	Master Protein	A0A088A7A0	Uncharacterized protein OS=Apis mellifera OX=7460 PE=4 SV=1		0	FALSE	7.883	3	1	3	1	383	42.6	8.1	2.97	3.23									2.66										1	1									1
FALSE	High	Master Protein	A0A088A7C0	Uncharacterized protein OS=Apis mellifera OX=7460 GN=nkd PE=4 SV=1		0	FALSE	17.887	12	4	7	4	604	66.6	9.77							4.22			2.91	4.63							2.46	3.28								1			1	2
FALSE	High	Master Protein	A0A088A7D1	Uncharacterized protein OS=Apis mellifera OX=7460 GN=LOC410306 PE=3 SV=1	PREDICTED: Apis mellifera ADP-ribosylation factor 2 (LOC410306), mRNA	0	FALSE	26.846	36	5	66	4	180	20.4	7.37	10.28	4.83	11.79	14.81	10.16	8.8	9.85	10.15	2.19	5.34	7.37	4.9	10.48	13.62	9.8	8.46		17.11	4.7	2.21	2	1	3	4	3	2	2	3	1	2	2	2	2	3
FALSE	High	Master Protein	A0A088A7D2	Uncharacterized protein OS=Apis mellifera OX=7460 GN=LOC724580 PE=4 SV=1		0	FALSE	19.552	22	2	7	2	128	13.9	7.42																		7.18	4.57	10.32
FALSE	High	Master Protein	A0A088A7E2	Uncharacterized protein OS=Apis mellifera OX=7460 PE=4 SV=1	PREDICTED: Apis mellifera collagen alpha-2(IX) chain (LOC412865), transcript variant X10, mRNA	0	FALSE	43.067	10	5	61	5	742	77	9.2	11.07		0	7.36	7.05	17.75	12.13	11.68	4.23	13.38	3.63	6.71	11.82	11.23	6.48		0				3		1	2	2	3	3	4	3	5	1	2	3	4
FALSE	High	Master Protein	A0A088A7F3	Uncharacterized protein OS=Apis mellifera OX=7460 PE=3 SV=1	Apis cerana cerana cytochrome P450 4AZ1 mRNA, complete cds	0	FALSE	46.537	28	9	43	9	488	57.7	8.75		19.21	3.07			6.41	17.22	18.1			6.36	3.01	6.68	3.21					4.79			5	2			2	7	8			3	2	5	2
FALSE	High	Master Protein	A0A088A7G1	Uncharacterized protein OS=Apis mellifera OX=7460 PE=3 SV=1	PREDICTED: Apis mellifera cytochrome P450 6k1 (LOC551560), mRNA	0	FALSE	21.958	13	5	13	5	518	60	9.13		9.97				2.85	5.44	2.26			2.91				5.46					2.29		2				1	2	1			2
FALSE	High	Master Protein	A0A088A7H9	Uncharacterized protein OS=Apis mellifera OX=7460 PE=4 SV=1		0	FALSE	9.933	4	3	3	3	1199	139.5	7.17											0							2.85		2.21											1
FALSE	High	Master Protein	A0A088A7J1	Uncharacterized protein OS=Apis mellifera OX=7460 PE=3 SV=1		0	FALSE	26.467	18	8	32	4	430	49	8.92	3.64			1.61		2.34			1.85		2.55	2.14	9.57	3.28	2.53	1.63		1.68	1.78	7.58	2			1		1			2		4	2	4	2
FALSE	High	Master Protein	A0A088A7M1	Uncharacterized protein OS=Apis mellifera OX=7460 GN=100577870 PE=4 SV=1		0	FALSE	15.239	17	3	33	1	201	23	8.98	5.25	2.94	2.59	2.09	2.62	5.14	5.2	10.5	4.84		8.75			2.9	8.92	3.03		14.82	2.74	5.64	2	1	1	1	1	2	2	2	1		2			1
FALSE	High	Master Protein	A0A088A7R3	Uncharacterized protein OS=Apis mellifera OX=7460 GN=LOC551843 PE=4 SV=1	PREDICTED: Apis mellifera mitochondrial proton/calcium exchanger protein (LOC551843), mRNA	0	FALSE	34.415	14	7	25	7	773	88.8	8.4	9.23		5.35			9.45	3.8	6.68		2.95	3.64	4.9	8.73	3.56	3.33	2.75	6.26	3.21	3.82	0	3		2			3	1	2		2	1	1	2	1
FALSE	High	Master Protein	A0A088A7T5	Uncharacterized protein OS=Apis mellifera OX=7460 PE=3 SV=1	PREDICTED: Apis mellifera glycerol kinase (LOC409261), transcript variant X1, mRNA	0	FALSE	17.585	10	4	16	4	614	68.7	6.57		2.52				6.6	9.79	7.7		2.58	6.26		5.02	6.1								1				1	3	3		1	2		2	2
FALSE	High	Master Protein	A0A088A7V7	Uncharacterized protein OS=Apis mellifera OX=7460 PE=3 SV=1	PREDICTED: Apis mellifera acetyl-CoA acetyltransferase, mitochondrial (LOC726218), mRNA	0	FALSE	93.521	37	14	69	14	501	55	8.4	9.28	12.62	2.43			37.75	24.56	3.27	0		24.94	9.36	0	2.96	12.8	6.96	8.42	16.4	0	6.5	4	4	1			9	5	1	1		6	3	1	2
FALSE	High	Master Protein	A0A088A7W1	Uncharacterized protein OS=Apis mellifera OX=7460 GN=Drp1 PE=3 SV=1		0	FALSE	117.956	38	19	128	19	739	83	7.33	29.86	19.56	5.73	5.79	5.52	45.3	20.67	7.52	5.42	11.87	45.72	6.21	11.34	28.21	5.88	33.16	8.75	28.53	11.23	3.08	9	6	1	3	1	12	5	2	5	3	12	2	2	11
FALSE	High	Master Protein	A0A088A7W9	Uncharacterized protein OS=Apis mellifera OX=7460 GN=LOC411474 PE=4 SV=1		0.002	FALSE	4.212	1	1	2	1	1906	219.7	6.79						0	0																			1	1
FALSE	High	Master Protein	A0A088A7X2	Uncharacterized protein OS=Apis mellifera OX=7460 PE=4 SV=1	PREDICTED: Apis mellifera dynein heavy chain, cytoplasmic (LOC725068), transcript variant X1, mRNA	0	FALSE	207.865	17	43	145	43	3368	386.7	6.49	13.52	20.54	4.95	4.16		38.15	42.88	35.3		14.7	48.59	14.45	13.07	28.13	5.81	10.1	28.15	21.06	12.39	16.84	6	7	2	2		10	12	12		6	16	5	6	11
FALSE	High	Master Protein	A0A088A7X3	Uncharacterized protein OS=Apis mellifera OX=7460 PE=4 SV=1	PREDICTED: Apis mellifera dynein heavy chain, cytoplasmic (LOC725068), transcript variant X1, mRNA	0	FALSE	118.103	25	21	125	21	1136	128.8	6.23	5.08	17.35	0	0	1.67	37.6	31.6	20.14		6.63	34.14	15.42	13.59	18.81	0	1.72	5.13	9.06	4.87	10.42	4	7	1	1	2	6	10	7		5	8	6	6	7
FALSE	High	Master Protein	A0A088A7Y3	Uncharacterized protein OS=Apis mellifera OX=7460 GN=LOC411704 PE=4 SV=1		0	FALSE	10.581	6	2	17	1	356	40.3	6.43		0								2.86	2.62	4.89	5.18	2.84	5.08		3.03	2.58	2.76	2.52		2								1	1	1	2	1
FALSE	High	Master Protein	A0A088A7Z3	Uncharacterized protein OS=Apis mellifera OX=7460 PE=4 SV=1		0.001	FALSE	4.654	14	1	8	1	71	8.3	9.67						2.87	2.9	2.83	2.02	2.82	2.8				2.32	2.8										1	1	1	1	1	1
FALSE	High	Master Protein	A0A088A819	Uncharacterized protein OS=Apis mellifera OX=7460 PE=4 SV=1	PREDICTED: Apis mellifera protein Skeletor, isoforms B/C (LOC410021), transcript variant X1, mRNA	0	FALSE	17.468	7	4	7	4	856	96.2	6.3	3.24					5.4		2.47							1.65	0				0	1					2		1
FALSE	High	Master Protein	A0A088A820	Uncharacterized protein OS=Apis mellifera OX=7460 GN=LOC410022 PE=3 SV=1	PREDICTED: Apis mellifera mitochondrial-processing peptidase subunit beta (LOC410022), mRNA	0	FALSE	227.352	70	23	590	23	477	53.3	5.53	131.92	99.54	99.3	62.69	85.66	118.05	107.11	91.09	102.76	85.97	91.22	52.93	99.47	97.86	103.29	89.62	81.42	53.68	40.9	127.12	17	13	16	14	15	18	16	13	17	14	14	9	12	11
FALSE	High	Master Protein	A0A088A871	Uncharacterized protein OS=Apis mellifera OX=7460 GN=mRpL22 PE=3 SV=1		0.001	FALSE	4.695	9	2	3	2	211	24.9	9.48		0										0	2.18									1										1	1
FALSE	High	Master Protein	A0A088A873	Uncharacterized protein OS=Apis mellifera OX=7460 PE=4 SV=1	PREDICTED: Apis mellifera apoptosis inhibitor 5 (LOC551686), mRNA	0	FALSE	31.109	16	5	42	5	526	60	8.4	8.35	7.28	2.64	4.51	5.61	5.15	9	8.93	2.84	6.15	9.45	9.93	3.76	2.08		4.4	8.41	3.05	2.19		2	2	2	3	3	2	1	2	2	2	2	2	2	2
FALSE	High	Master Protein	A0A088A884	Uncharacterized protein OS=Apis mellifera OX=7460 GN=100577163 PE=4 SV=1	PREDICTED: Apis mellifera insulin-like growth factor-binding protein complex acid labile subunit (LOC100577163), mRNA	0	FALSE	45.739	31	7	20	7	346	38.8	8.22		3.47		2.07	0			0		26.15	2.34				2.02	2.99						1		2	1			1		6	1
FALSE	High	Master Protein	A0A088A891	Uncharacterized protein OS=Apis mellifera OX=7460 PE=3 SV=1	PREDICTED: Apis mellifera bifunctional glutamate/proline--tRNA ligase (LOC725395), mRNA	0	FALSE	84.238	17	19	86	19	1556	180.3	8.44	9.97	7.08	2.97	0	2.97	16.66	17.71	20.05		8.33	17.59	13.89	6.38	5.56	3.23	2.1	3.72	8.97	0		3	3	1	2	1	8	9	9		5	7	6	5	5
FALSE	High	Master Protein	A0A088A892	Uncharacterized protein OS=Apis mellifera OX=7460 GN=LOC551436 PE=3 SV=1	PREDICTED: Apis mellifera T-complex protein 1 subunit theta (LOC551436), mRNA	0	FALSE	120.325	57	21	128	21	544	59.1	5.91	20.27	21.57	5.04	2.29	2.78	32	24.34	9.87	0	4.65	41.39	24.32	12.06	25.96	7.73	14.56	9.66	20.53	15.35	24.85	7	6	2	1	2	9	7	3	1	2	13	7	3	7
FALSE	High	Master Protein	A0A088A8A2	Uncharacterized protein OS=Apis mellifera OX=7460 PE=4 SV=1	PREDICTED: Apis mellifera sorbin and SH3 domain-containing protein 1 (LOC409655), transcript variant X1, mRNA	0	FALSE	196.08	47	31	239	31	859	98.3	8.09	62.25	21.94	16.61	19.41	16.19	70.48	35.8	25.58	50.43	25.45	37.56	6.99	44.75	36.2	11.35	43.52	41.35	31.72	14.5	1.83	17	5	8	8	8	18	13	8	20	10	12	3	15	13
FALSE	High	Master Protein	A0A088A8C5	Uncharacterized protein OS=Apis mellifera OX=7460 PE=4 SV=1	PREDICTED: Apis mellifera long-chain fatty acid transport protein 4 (LOC552113), transcript variant X1, mRNA	0	FALSE	33.061	23	7	20	7	538	59.7	7.88		5.93				5.67	8.66	7.32			5.75	5.9	9.51	2.77			2.23					2				2	3	3			3	2	3	1
FALSE	High	Master Protein	A0A088A8C7	Uncharacterized protein OS=Apis mellifera OX=7460 GN=Cox5b PE=4 SV=1	PREDICTED: Apis mellifera cytochrome c oxidase subunit 5B, mitochondrial (LOC552610), mRNA	0	FALSE	104.128	55	6	229	6	122	13.9	8.32	49.53	59.6	29.57	15.03	36.01	48.12	55.3	54.9	41.2	52.14	25.97	31.34	37.35	34.55	34.26	48.92	46.27	26.36	15.55	7.47	5	6	4	2	4	5	5	5	5	5	3	5	4	4
FALSE	High	Master Protein	A0A088A8G1	Uncharacterized protein OS=Apis mellifera OX=7460 GN=Rpl39 PE=3 SV=1		0	FALSE	7.181	20	1	7	1	51	6.4	12.56			3.06	3.1	2.89						3.78	3.47	6.23										1	1	1						1	1	1
FALSE	High	Master Protein	A0A088A8G2	Uncharacterized protein OS=Apis mellifera OX=7460 GN=LOC413120 PE=4 SV=1		0.001	FALSE	4.649	4	1	1	1	364	42.4	8.81																		2.51
FALSE	High	Master Protein	A0A088A8I0	Uncharacterized protein OS=Apis mellifera OX=7460 PE=4 SV=1	PREDICTED: Apis mellifera transcription factor SPT20 homolog (LOC409852), mRNA	0	FALSE	98.333	28	14	86	14	779	89.2	5.34	10.12	7.72	29.22	0	2.49	31.26	20.07	17.94	2.73	6.13	22.78	15.7	16.98	7.8	4.3	3.77	21.44	17.44	6.47	1.97	2	2	7	1	1	7	3	3	3	2	5	3	3	2
FALSE	High	Master Protein	A0A088A8I9	Uncharacterized protein OS=Apis mellifera OX=7460 GN=LOC409930 PE=4 SV=1		0	FALSE	69.312	64	6	284	6	121	14.3	9.79	46.57	38.63	54.43	24.62	38.01	47.27	30.09	48.43	22.97	42.1	35.44	29.8	37.97	41.14	37.35	24.55	31.88	94.83	53.45	4.6	5	4	6	6	6	4	4	5	4	6	5	4	5	5
FALSE	High	Master Protein	A0A088A8V7	Uncharacterized protein OS=Apis mellifera OX=7460 GN=SrpRbeta PE=4 SV=1	PREDICTED: Apis mellifera signal recognition particle receptor subunit beta (LOC410469), mRNA	0	FALSE	15.696	23	4	4	4	244	27.7	8.21		0	2.75				2.3											3.11				1	1				1
FALSE	High	Master Protein	A0A088A8Y3	Uncharacterized protein OS=Apis mellifera OX=7460 PE=4 SV=1	PREDICTED: Apis mellifera high mobility group protein DSP1 (LOC725551), mRNA	0	FALSE	12.064	10	3	4	3	396	44.6	9.63						3.15										5.04	3.36									1
FALSE	High	Master Protein	A0A088A8Y4	Uncharacterized protein OS=Apis mellifera OX=7460 GN=msps PE=4 SV=1		0	FALSE	27.749	3	5	23	5	1985	223	7.99	6.64	5.22	1.72		2.14	5.74	8.71	2.16		2.5	6.39	2.76	2.9		2.1	2.3	2.71	2.85			2	1	1		1	2	2	1		1	2	1	1
FALSE	High	Master Protein	A0A088A8Z2	Uncharacterized protein OS=Apis mellifera OX=7460 GN=scf PE=4 SV=1	PREDICTED: Apis mellifera calumenin (LOC411647), mRNA	0	FALSE	34.322	30	6	18	6	324	37.7	4.61	3.65		0			9.01	4.49	2.49			2.29					2.62	20.97			3.85	2		1			3	2	1			1
FALSE	High	Master Protein	A0A088A932	Uncharacterized protein OS=Apis mellifera OX=7460 PE=3 SV=1		0	FALSE	13.599	2	3	6	3	2118	239.7	7.75						2.21					2.05	0		2.28												1					2	1		2
FALSE	High	Master Protein	A0A088A939	Uncharacterized protein OS=Apis mellifera OX=7460 GN=LOC724264 PE=4 SV=1	PREDICTED: Apis mellifera NADH dehydrogenase [ubiquinone] 1 alpha subcomplex subunit 7 (LOC724264), mRNA	0	FALSE	9.35	24	2	30	2	98	11.2	9.99	5.19	7.72	2.54	2.41	5.04	2.35	2.6	8.17	4.95	5.44	5.88	2.86	5.43	2.92	4.85	2.27	5.64				1	2	1	1	1	1	1	2	1	2	1	1	2	1
FALSE	High	Master Protein	A0A088A941	Uncharacterized protein OS=Apis mellifera OX=7460 GN=LOC411905 PE=4 SV=1		0.001	FALSE	5.633	2	1	1	1	928	103.8	5.11																	3.21
FALSE	High	Master Protein	A0A088A955	Uncharacterized protein OS=Apis mellifera OX=7460 GN=724624 PE=4 SV=1	PREDICTED: Apis mellifera endocuticle structural glycoprotein SgAbd-1 (LOC724624), mRNA	0	FALSE	18.067	27	3	7	3	137	15.4	5.8								4.35					3.35			4.9		3.14	4.65									1					1
FALSE	High	Master Protein	A0A088A956	Uncharacterized protein OS=Apis mellifera OX=7460 GN=CPR24 PE=4 SV=1		0	FALSE	25.829	19	3	30	3	171	19.2	7.33	4.37	7.98	11.61	7.31	7.51		3.86	7.52	6.9	8.39	2.28	5.18	3.51	8.48	7.55			3.21		2.26	1	2	3	2	2		1	2	2	3	1	2	1	2
FALSE	High	Master Protein	A0A088A958	Uncharacterized protein OS=Apis mellifera OX=7460 GN=LOC552758 PE=3 SV=1	PREDICTED: Apis mellifera retinol dehydrogenase 12 (LOC552758), mRNA	0	FALSE	27.345	23	6	29	5	328	36.8	7.96	6.22	2.74	8.88		2.94	7.73	5.23	7.89		2.64	5.68		2.78	7.44	2.37	4.64		2.32		6.31	2	1	2		1	3	1	3		1	2		1	2
FALSE	High	Master Protein	A0A088A959	Uncharacterized protein OS=Apis mellifera OX=7460 GN=LOC726995 PE=4 SV=1	PREDICTED: Apis mellifera endocuticle structural glycoprotein ABD-4 (LOC726995), transcript variant X2, mRNA	0	FALSE	47.227	37	6	121	6	183	20.7	5.41	26.69	10.71	23.11	24.7	24.8	13.28	13.97	17.51	31.2	15.52	10.82	8.16	21.19	8.08	14.32	16.74	8.76	20.59	14.09	9.64	6	2	4	5	4	3	3	4	6	2	2	3	4	2
FALSE	High	Master Protein	A0A088A988	Uncharacterized protein OS=Apis mellifera OX=7460 GN=CTL4 PE=4 SV=1	PREDICTED: Apis mellifera sushi, von Willebrand factor type A, EGF and pentraxin domain-containing protein 1 (LOC412825), transcript variant X1, mRNA	0	FALSE	436.491	28	66	462	66	3510	383.4	5.17	65.19	35.74	2.29	13.12	56.88	128.71	115.35	52.56	1.95	41.05	177.47	61.15	38.34	95.53	72.73	28.31	90.29	57.21	18.36	46.51	16	13	2	6	15	37	32	21	2	18	43	17	14	31
FALSE	High	Master Protein	A0A088A995	Uncharacterized protein OS=Apis mellifera OX=7460 PE=4 SV=1	PREDICTED: Apis mellifera titin homolog (LOC725936), mRNA	0.002	FALSE	4.304	19	1	1	1	53	6.3	6.68																			2.51
FALSE	High	Master Protein	A0A088A996	Uncharacterized protein OS=Apis mellifera OX=7460 PE=4 SV=1	PREDICTED: Apis mellifera titin homolog (LOC725936), mRNA	0	FALSE	123.45	12	23	76	23	3062	346.8	5	24.61	17.08				18.53	13.33	4.47		5.28	17.09	1.81	19.76	10.06		8.86	22.52	8.19	4.35	2.14	8	6				6	6	3		3	8	1	8	6
FALSE	High	Master Protein	A0A088A997	Uncharacterized protein OS=Apis mellifera OX=7460 PE=4 SV=1	PREDICTED: Apis mellifera titin homolog (LOC725936), mRNA	0	FALSE	209.477	15	46	121	46	4413	514.9	5.16	26.31			0		46.32	17.68	4.97		7.5	18.71	2.02	24.78	16.23		6.52	18.27	12.64	29.42	10.74	10			1		18	8	2		4	5	4	13	7
FALSE	High	Master Protein	A0A088A998	Uncharacterized protein OS=Apis mellifera OX=7460 PE=4 SV=1	PREDICTED: Apis mellifera titin homolog (LOC725936), mRNA	0	FALSE	45.796	9	9	33	9	1487	165.4	7.43	8.85			1.84	1.78	6.84	3.85	3.81		5.45	7.79	0	24.58	5.74	2.21	3.09		0	3.17	0	3			1	1	2	1	2		3	3	1	7	3
FALSE	High	Master Protein	A0A088A9A7	Uncharacterized protein OS=Apis mellifera OX=7460 GN=LOC725594 PE=4 SV=1	PREDICTED: Apis mellifera PDZ and LIM domain protein Zasp (LOC725594), transcript variant X4, mRNA	0	FALSE	27.97	49	6	21	6	288	31.7	9.76	5.68	2.97				3.06	15.1	2.88	5.47	2.94	2.78	2.6	2.87			2.85	8.03				1	1				1	4	1	3	1	1	1	1
FALSE	High	Master Protein	A0A088A9B3	Uncharacterized protein OS=Apis mellifera OX=7460 GN=LOC725515 PE=4 SV=1	PREDICTED: Apis mellifera zinc finger protein 543 (LOC725515), transcript variant X2, mRNA	0.006	FALSE	2.895	2	1	3	1	439	50.1	7.47						0					0	0														1					1	1
FALSE	High	Master Protein	A0A088A9C2	Uncharacterized protein OS=Apis mellifera OX=7460 GN=LOC413354 PE=4 SV=1	PREDICTED: Apis mellifera integrin-linked protein kinase homolog pat-4 (LOC413354), mRNA	0	FALSE	126.997	45	20	178	20	449	50.5	7.62	30.05	11.5	7.2	8.92	8.03	41.79	23.56	17.38	11.62	18.99	57.55	30.64	20.63	39.02	16.73	27.57	8.19	12.94	13.67	13.41	9	4	3	5	4	12	8	4	5	5	13	10	8	9
FALSE	High	Master Protein	A0A088A9C5	Uncharacterized protein OS=Apis mellifera OX=7460 PE=4 SV=1	PREDICTED: Apis mellifera titin (LOC551259), transcript variant X10, mRNA	0	FALSE	63.127	10	11	79	11	1218	137	5.38	15.88	12.15	1.77			10.92	11.39	13.52	4.73	10.36	9.69	6.58	11.42	8.61	2.12	7.22	2.22	12.1	10.2	4.34	5	2	1			4	3	5	4	5	4	3	5	4
FALSE	High	Master Protein	A0A088A9C6	Uncharacterized protein OS=Apis mellifera OX=7460 PE=4 SV=1	PREDICTED: Apis mellifera titin (LOC551259), transcript variant X21, mRNA	0	FALSE	6130.54	51	803	8944	803	23421	2662.1	5.47	2406.47	1281.09	437.65	695.48	860.53	2169.08	1429.27	968.79	994.43	1311.76	1761.59	986.96	1762.34	1102.45	657.8	1514.09	1554.62	1259.25	1410.94	561.67	451	297	130	213	239	430	335	235	305	311	403	247	412	279
FALSE	High	Master Protein	A0A088A9D8	Uncharacterized protein OS=Apis mellifera OX=7460 GN=LOC408414 PE=3 SV=1	PREDICTED: Apis mellifera tropomyosin-1 (LOC408414), mRNA	0	FALSE	557.616	75	38	1169	36	284	32.1	4.78	188.77	449.28	155.3	67.94	75.85	220.03	278.57	172.13	302.51	193.47	63.14	131.28	91.12	87.04	209.66	46.28	307.41	135.43	48.03	616.65	22	33	24	15	15	25	30	20	31	23	11	21	16	14
FALSE	High	Master Protein	A0A088A9G7	Uncharacterized protein OS=Apis mellifera OX=7460 PE=4 SV=1		0	FALSE	31.256	7	8	71	8	904	91.4	4.92	0	0	1.73		20.48	3.75	17.64		1.71		8.35	5.46	4.91	2.26	12.94			1.82	8.38	24.08	1	1	1		7	2	4		2		3	3	2	2
FALSE	High	Master Protein	A0A088A9I3	Uncharacterized protein OS=Apis mellifera OX=7460 GN=LOC412017 PE=4 SV=1	PREDICTED: Apis mellifera etoposide-induced protein 2.4 (LOC412017), transcript variant X1, mRNA	0.002	FALSE	3.819	5	1	3	1	318	35.9	9.31		0									0	0										1									1	1
FALSE	High	Master Protein	A0A088A9K7	Uncharacterized protein OS=Apis mellifera OX=7460 GN=107964828 PE=4 SV=1	PREDICTED: Apis mellifera cuticle protein 19 (LOC107964828), mRNA	0	FALSE	16.785	25	4	9	4	203	22	8.38			2.6	10.13	1.61				6.42														1	3	1				3
FALSE	High	Master Protein	A0A088A9Q2	Uncharacterized protein OS=Apis mellifera OX=7460 GN=Pros26 PE=4 SV=1	PREDICTED: Apis mellifera proteasome subunit beta type-1 (LOC411695), mRNA	0	FALSE	50.404	44	8	56	8	236	26.1	5.95	2.76	9.96	6.91			27.51	19.07	5.9		1.96	28.53	15.79	9.81	7.21			11.16	4.01	1.61	10.88	1	2	3			4	2	1		1	4	3	2	2
FALSE	High	Master Protein	A0A088A9R3	Uncharacterized protein OS=Apis mellifera OX=7460 GN=LOC408904 PE=3 SV=1	PREDICTED: Apis mellifera non-specific lipid-transfer protein (LOC408904), mRNA	0	FALSE	230.338	66	25	468	25	539	59	8.47	74.59	78.35	102.14	18.34	12.86	156.3	90.04	78.97	18.14	4.29	94.27	82	30.15	91.71	39.44	99.31	31.46	132.75	44.97	39.13	13	15	17	8	7	22	15	17	10	4	16	13	8	15
FALSE	High	Master Protein	A0A088A9U9	Uncharacterized protein OS=Apis mellifera OX=7460 PE=4 SV=1		0	FALSE	39.099	8	10	45	10	2153	242.6	6.58	8.87	4.98		13.71	14.54	2.61	2.3	2.62	7.48	2.45	2.64		5.31			1.99	2.59	9.75	3.24		4	2		6	5	1	1	1	3	1	1		2
FALSE	High	Master Protein	A0A088A9V5	Uncharacterized protein OS=Apis mellifera OX=7460 PE=4 SV=1	PREDICTED: Apis mellifera actin cytoskeleton-regulatory complex protein PAN1 (LOC100577498), transcript variant X3, mRNA	0	FALSE	114.564	19	22	90	22	1562	177.9	5.74	22.38	12.38	5.03	1.89	1.7	8.42	4.89	10.89	12.49	4.7	10.45	2.37	17.82	13.04	3.8	16.04	33.93	14.8	20.94	12.42	7	4	2	2	2	4	2	3	6	2	4	1	7	5
FALSE	High	Master Protein	A0A088A9Y7	Uncharacterized protein OS=Apis mellifera OX=7460 GN=mRpL53 PE=4 SV=1		0.002	FALSE	3.803	13	1	2	1	120	13.3	9						2.97	2.69																			1	1
FALSE	High	Master Protein	A0A088A9Y9	Uncharacterized protein OS=Apis mellifera OX=7460 PE=4 SV=1	PREDICTED: Apis mellifera laminin subunit beta-1 (LOC726736), transcript variant X1, mRNA	0	FALSE	1034.34	60	95	2827	95	1840	205.5	5.35	473.1	378.66	302.93	519.05	539.59	415.04	430.49	488.88	358.27	482.06	314.37	422.66	413.26	362.54	433.35	346.4	387.31	373.06	401.36	395.53	62	55	55	71	71	60	60	62	63	64	51	60	58	57
FALSE	High	Master Protein	A0A088A9Z0	Uncharacterized protein OS=Apis mellifera OX=7460 GN=TEPA PE=4 SV=1	PREDICTED: Apis mellifera CD109 antigen (LOC413980), transcript variant X2, mRNA	0	FALSE	305.451	42	49	390	49	1612	184.9	6.62	85.49	90.57	46.57	10.35	21.95	83.77	87.67	120.9	0	64.46	104.2	39.94	53.72	66.22	58.32	21.28	53.1	54.81	16.11	18.54	22	22	13	5	10	22	24	29	1	19	26	10	14	19
FALSE	High	Master Protein	A0A088AA39	Uncharacterized protein OS=Apis mellifera OX=7460 PE=4 SV=1		0.001	FALSE	4.761	12	1	1	1	146	16.5	8.94		2.43																				1
FALSE	High	Master Protein	A0A088AA90	Uncharacterized protein OS=Apis mellifera OX=7460 GN=LOC552534 PE=4 SV=1		0	FALSE	42.911	44	5	109	5	153	16.1	9.85	30.16	17.81	35.85	20.54	30.3	18.93	26.01	29.73	7.31	33.17	25.59	12.93	28.3	18.33	24.62	0		4.56			3	2	5	5	5	3	4	5	1	5	5	3	5	4
FALSE	High	Master Protein	A0A088AA98	Uncharacterized protein OS=Apis mellifera OX=7460 PE=3 SV=1	PREDICTED: Apis mellifera ectonucleoside triphosphate diphosphohydrolase 5 (LOC551373), transcript variant X3, mRNA	0	FALSE	12.09	19	3	30	3	191	21	5.54	2.12	1.99	0	0	1.62	3.56	3.62	2.1	0		4.1	1.99	3.88	1.72	1.75	1.76	5.44	10.7	1.99	1.7	1	1	1	1	1	1	1	1	1		1	1	1	1
FALSE	High	Master Protein	A0A088AAC0	Uncharacterized protein OS=Apis mellifera OX=7460 GN=LOC412607 PE=4 SV=1		0	FALSE	22.077	6	5	19	5	1173	131	8.38	5.2	6.21			0	5.14	1.67			1.74	5.5		1.6	1.65	0	1.96		1.63			2	2			1	2	1			1	2		2	2
FALSE	High	Master Protein	A0A088AAC3	Uncharacterized protein OS=Apis mellifera OX=7460 GN=100576193 PE=4 SV=1		0	FALSE	8.031	11	1	3	1	251	27.2	9.33			3.74		3.47					4.09													1		1					1
FALSE	High	Master Protein	A0A088AAE1	Uncharacterized protein OS=Apis mellifera OX=7460 GN=Pka-C3 PE=3 SV=1		0	FALSE	8.997	8	2	7	2	331	37.9	6.47	2.14					5.21	2.56	5.03			3.01										1					2	1	2			1
FALSE	High	Master Protein	A0A088AAI5	Uncharacterized protein OS=Apis mellifera OX=7460 GN=Catsup PE=4 SV=1		0	FALSE	13.262	9	3	16	3	404	45.5	6.4	2.14				2.33	2.23		5.55		0	2.4	2.47	2.28		0	5.08		2.47	2.52		1				1	1		1		1	1	1	1
FALSE	High	Master Protein	A0A088AAI6	Uncharacterized protein OS=Apis mellifera OX=7460 GN=LOC412598 PE=4 SV=1	PREDICTED: Apis mellifera transmembrane protein 268 (LOC412598), transcript variant X2, mRNA	0	FALSE	20.16	13	5	14	5	457	52.2	7.84							6.5	2.45			1.95	2.21	2.27		0	4.88		6.98	1.85	2.16							3	1			1	1	1
FALSE	High	Master Protein	A0A088AAK6	Uncharacterized protein OS=Apis mellifera OX=7460 GN=LOC551499 PE=4 SV=1	PREDICTED: Apis mellifera FIT family protein CG10671 (LOC551499), mRNA	0.002	FALSE	4.43	3	1	6	1	392	44.2	9.82		2.66	2.02			2.72	2.74	2.24					1.81									1	1			1	1	1					1
FALSE	High	Master Protein	A0A088AAV2	Uncharacterized protein OS=Apis mellifera OX=7460 PE=4 SV=1		0	FALSE	9.388	4	3	13	3	929	105.3	7.72		2.27		0		1.89	2.36	2.41			0	2.64		0	1.92	1.61		1.94		3.63		1		1		1	1	1			1	1		1
FALSE	High	Master Protein	A0A088AAV5	Uncharacterized protein OS=Apis mellifera OX=7460 GN=LOC409809 PE=3 SV=1		0	FALSE	171.036	61	23	131	23	534	57.9	6.64	31.44	28.74	1.8	0	2.02	54	29.11	3.45	2.37	6.62	67.46	19.89	5.89	34.53	5.11	19.1	17.92	35.64	17.36	7.17	8	6	1	1	1	13	7	1	1	2	15	6	2	8
FALSE	High	Master Protein	A0A088AB18	Uncharacterized protein OS=Apis mellifera OX=7460 PE=4 SV=1		0	FALSE	53.169	24	10	34	10	544	58.9	9.26	8.56	6.14				10.29	9.17	2.74		0	14.69	2.5		1.9		15.36		8.14	2.66		2	2				3	3	2		1	5	2		2
FALSE	High	Master Protein	A0A088AB23	Uncharacterized protein OS=Apis mellifera OX=7460 PE=4 SV=1		0	FALSE	10.129	14	1	24	1	70	8.5	9.28	2.83	1.99	4.79	0		5.05	4.34	5.22		2.41	2.31	1.75	3.02	2.84	2.15	2.49	2.6	5.01	2.45		1	1	1	1		1	1	1		1	1	1	1	1
FALSE	High	Master Protein	A0A088AB41	Uncharacterized protein OS=Apis mellifera OX=7460 GN=LOC410165 PE=4 SV=1	PREDICTED: Apis mellifera RNA-binding protein Nova-1 (LOC410165), transcript variant X2, misc_RNA	0	FALSE	56.628	29	10	72	10	514	54.2	7.74	18.01	12.53	0	2.32	2.28	22	12.63	2.65	5.2	2.06	22.37	16.45	16.42	20.91	0	2.44	12.75	5.42	2.61		3	2	1	1	1	5	3	2	3	1	6	5	5	5
FALSE	High	Master Protein	A0A088AB56	Uncharacterized protein OS=Apis mellifera OX=7460 PE=4 SV=1		0	FALSE	13.847	7	4	16	4	735	83.6	8.82	2.02		0			4.93	6.47	2.24		2.12	0	2.69	0	0							1		2			1	2	2		1	1	1	1	1
FALSE	High	Master Protein	A0A088AB84	Uncharacterized protein OS=Apis mellifera OX=7460 GN=GstZ1 PE=3 SV=1		0	FALSE	6.482	6	1	6	1	217	24.8	7.77	0	2.36				2.61			0		2.39			2.44							1	1				1			1		1			1
FALSE	High	Master Protein	A0A088AB99	Uncharacterized protein OS=Apis mellifera OX=7460 PE=4 SV=1	PREDICTED: Apis mellifera fibrillin-2 (LOC724421), mRNA	0	FALSE	140.325	14	16	208	1	1552	168.2	6.49		12.75	5.19	41.13	32.55	19.81	5.96	44.27	36.05	91.42	9.47	0	12.07	14.59	10.8	44.93	8.79	13.35	15.08	10.2		6	2	12	10	8	3	11	11	14	6	1	7	7
FALSE	High	Master Protein	A0A088ABA5	Uncharacterized protein OS=Apis mellifera OX=7460 GN=LOC409457 PE=4 SV=1		0	FALSE	28.772	5	8	21	8	2646	293.7	7.53	2.23	2.03				2.01	5.49	1.98			4.58	0	1.92	0	1.79				1.68		2	1				2	4	2			3	1	2	1
FALSE	High	Master Protein	A0A088ABB1	Uncharacterized protein OS=Apis mellifera OX=7460 PE=4 SV=1		0	FALSE	17.362	6	3	59	3	563	65.3	9.54	6.36	14.59	6.36	5.46	6.51	5.88	8.58	6.41	2.45	6.44	13.06	12.49	5.96	6.57	5.46	14.89		12.56	7.78	5.66	1	2	1	1	1	2	2	2	1	1	3	3	2	3
FALSE	High	Master Protein	A0A088ABG0	Uncharacterized protein OS=Apis mellifera OX=7460 GN=ebi PE=4 SV=1		0.001	FALSE	5.71	4	1	4	1	512	56.1	5.5						2.53		2.56			3.14						3.32									1		1			1
FALSE	High	Master Protein	A0A088ABI0	Uncharacterized protein OS=Apis mellifera OX=7460 GN=LOC551682 PE=4 SV=1		0.001	FALSE	5.719	6	2	3	2	425	48.5	7.01						2.15					2.03					2.71										1					1
FALSE	High	Master Protein	A0A088ABI6	Uncharacterized protein OS=Apis mellifera OX=7460 PE=3 SV=1		0	FALSE	6.353	3	1	2	1	603	68.1	8.29											2.33	0																			1	1
FALSE	High	Master Protein	A0A088ABL3	Uncharacterized protein OS=Apis mellifera OX=7460 GN=P58IPK PE=4 SV=1		0	FALSE	6.174	4	2	2	2	482	55.5	6.95																0			0
FALSE	High	Master Protein	A0A088ABM3	Uncharacterized protein OS=Apis mellifera OX=7460 GN=CPR2 PE=4 SV=1	Apis mellifera cuticular protein 2 (CPR2), mRNA	0.002	FALSE	4.27	11	1	1	1	264	26.4	8.28									2.45																				1
[truncated: 526 more rows]
[truncated: 37 more columns]
